# Supplementary material for: Tipifarnib as a Precision Therapy for HRAS -Mutant Head and Neck Squamous Cell Carcinomas
Source: Oxford University Press journal article supplement (doi:10.1158/1535-7163.mct-19-0958), 2020-07-29
Supplement: 15357163mct190958-sup-230212_2_supp_6334023_qbcrlf.xlsx [file 15357163mct190958-sup-230212_2_supp_6334023_qbcrlf.xlsx]

## Sheet: Tipi_modulated genes_sensitive 
Name	Description	Fold Change	Log Fold Change	p-Value	pAdj	Average Log2 Expression	Cluster	HN2579_veh1_rep1	HN3504_Tipifarnib2_rep2	HN2579_veh3_rep2	HN3504_Tipifarnib3_rep1	HN3504_veh3_rep1	HN3504_Tipifarnib2_rep3	HN3504_veh3_rep3	HN2579_Tipifarnib1_rep2	HN3504_veh3_rep2	HN3504_Tipifarnib2_rep1	HN3504_veh2_rep2	HN3504_Tipifarnib1_rep3	HN3504_veh2_rep3	HN3504_Tipifarnib1_rep2	HN3504_veh2_rep1	HN3504_Tipifarnib1_rep1	HN3504_veh1_rep2	HN2579_Tipifarnib3_rep3	HN3504_veh1_rep1	HN2579_Tipifarnib3_rep2	HN2579_veh3_rep3	HN2579_Tipifarnib3_rep1	HN2579_veh1_rep3	HN2579_Tipifarnib2_rep3	HN2579_veh2_rep2	HN2579_Tipifarnib2_rep1	HN2579_veh2_rep3	HN2579_Tipifarnib2_rep2	HN2579_veh2_rep1	HN2579_Tipifarnib1_rep1	Gene ID	Alias
DOWNREGULATED
SERPINA11	serpin peptidase inhibitor_ clade A (alpha-1 antiproteinase_ antitrypsin)_ member 11	-8.86991	-3.14892	1.96e-13	2.32e-10	4.9909	2	0.626283	1.4946	4.36264	0	6.48362	0	4.7348	3.02008	7.0354	2.9344	7.28521	0	6.72403	0.852901	6.50228	0.939183	7.06151	2.15621	7.04287	0.665856	3.941	2.10339	4.31026	0	2.55322	1.6076	0.963007	1.77678	3.27282	0	256394	-
FBXO15	F-box protein 15	-7.71604	-2.94786	3.66e-12	2.3e-09	4.5105	2	0.626283	0.932761	2.97276	0	6.58746	0.881014	5.21926	0.775017	7.22148	1.30832	6.79199	2.65944	6.46001	0	5.90439	2.22335	4.37921	2.54606	6.18142	1.1197	2.10889	2.10339	0.923789	0.700864	2.29147	1.24181	1.53542	2.08253	3.60183	0.99088	201456	FBX15
SERPINA9	serpin peptidase inhibitor_ clade A (alpha-1 antiproteinase_ antitrypsin)_ member 9	-7.60859	-2.92763	6.28e-11	2.77e-08	7.2158	2	1.06154	3.57375	2.97276	2.12489	8.58246	3.76819	8.35435	1.27645	10.0959	4.62202	8.52213	3.10382	8.73002	2.33074	8.21965	3.21054	9.32593	0.758289	9.67846	1.97546	3.12626	1.86304	2.19798	1.52428	0.981038	0	0.963007	2.33467	0	2.79168	327657	GCET1, SERPINA11, SERPINA11B
CRLF1	cytokine receptor-like factor 1	-6.42876	-2.68454	1.97e-10	7.35e-08	6.6392	2	3.10604	5.22331	3.97079	4.34552	8.88974	3.35873	7.80423	2.57978	9.26273	5.15779	8.23889	2.26258	8.16282	3.71061	8.28769	4.20409	7.52248	4.34777	8.43708	1.1197	4.22284	3.04506	3.31772	2.58588	3.28761	0.750588	2.74334	1.38832	4.09531	1.57279	9244	CISS, CISS1, CLF, CLF-1, NR6, ZCYTOR5
CRHR1	corticotropin releasing hormone receptor 1	-6.3813	-2.67385	1.5e-09	4.47e-07	3.6314	2	0.626283	0	4.05814	0	5.49965	0	4.89491	0	6.7828	0	5.0392	1.71329	4.70922	0	4.86489	0	4.0875	2.98456	5.15799	0	3.29811	1.21342	1.88412	0	2.29147	1.24181	0	1.38832	3.27282	0	1394	CRF-R, CRF-R-1, CRF-R1, CRF1, CRFR-1, CRFR1, CRH-R-1, CRH-R1, CRHR, CRHR1L
STC1	stanniocalcin 1	-6.37321	-2.67202	1.87e-12	1.43e-09	7.5191	2	5.73292	5.38893	5.49307	5.45488	9.01141	5.28077	8.76828	4.69445	8.99557	6.67443	9.16485	3.87524	9.98023	4.82824	9.51693	5.49305	8.60013	2.85267	9.1493	3.60213	5.38776	2.10339	5.93322	4.43568	4.87	4.55593	4.62844	4.95085	6.16109	4.93649	6781	STC
CRTAM	cytotoxic and regulatory T cell molecule	-6.10119	-2.60909	1.66e-09	4.65e-07	3.7342	2	1.06154	1.89793	2.29704	0	6.11796	0	5.80745	1.64783	6.07078	0	5.87193	1.33307	5.49817	1.77332	4.989	2.22335	4.37921	1.25276	4.25359	0	2.10889	2.10339	0	0.700864	2.29147	1.24181	0	1.38832	2.84589	0	56253	CD355
LGALS1	lectin_ galactoside-binding_ soluble_ 1	-5.82234	-2.5416	5.32e-11	2.39e-08	11.881	1	9.2419	9.9839	9.81591	9.50939	14.1918	9.58609	12.3629	8.50102	13.5775	10.4228	13.9505	9.61376	13.7836	9.7848	13.3234	11.1772	13.3931	7.91669	13.3606	7.24539	9.89983	7.89323	10.4415	8.57475	8.88077	8.03931	8.942	8.01246	9.34903	8.19122	3956	GAL1, GBP
KLK1	kallikrein 1	-5.36873	-2.42458	4.35e-09	9.69e-07	5.2843	2	2.8031	0.932761	2.97276	1.42269	7.36299	0	6.3838	3.85927	7.68422	3.0674	7.32559	4.08352	6.76068	2.73181	7.24951	3.47143	6.15172	1.62033	6.47905	3.53072	3.941	2.79388	3.55644	1.52428	1.55962	3.39981	0.963007	3.18408	2.57328	1.9863	3816	KLKR, KLK6, HK1
LOC100506474	uncharacterized LOC100506474	-5.35204	-2.42009	4.65e-08	6.56e-06	1.2738	2	1.06154	0.932761	0.984495	0	1.80916	0.881014	4.05537	0	3.09167	0	1.4705	0.815325	3.57039	0	3.67573	0	2.26592	0	1.66401	0	2.93115	0.730693	0.923789	0	0	0	0	0	2.23686	0	100506474	-
ARC	activity-regulated cytoskeleton-associated protein	-5.18538	-2.37445	1.31e-08	2.4e-06	6.5425	2	3.01196	5.95182	3.55641	2.3791	8.46467	4.84675	8.47583	2.8877	8.93475	5.03322	7.80274	5.10545	8.21987	4.09783	7.70805	3.58608	7.89457	1.91301	8.40359	3.00686	3.83333	1.57449	2.45561	3.37604	2.96665	2.34905	3.83705	3.0496	3.44668	3.30547	23237	ARG3.1
TIMP1	TIMP metallopeptidase inhibitor 1	-4.93117	-2.30193	3.62e-07	3.53e-05	9.681	2	2.8031	7.52116	2.97276	6.83866	11.7557	7.3377	10.8826	3.5445	11.7679	7.27201	11.8551	6.88256	11.8704	6.48662	11.9554	6.63178	10.1009	2.15621	11.1167	1.1197	4.04119	2.10339	6.01555	2.2488	3.28761	2.14156	0.963007	2.9013	3.7419	0.99088	7076	CLGI, EPA, EPO, HCI, TIMP
HBA1	hemoglobin_ alpha 1	-4.86143	-2.28138	1.51e-07	1.73e-05	4.2573	2	3.01196	1.4946	0.984495	0	6.77509	0.881014	5.61848	2.8877	7.31988	0	5.78192	3.71755	5.75588	0	5.73748	2.89183	3.95201	1.25276	4.30726	1.74245	2.43779	1.86304	1.48243	0.700864	2.29147	1.6076	0	2.54923	2.57328	0.99088	3039	HBA-T3, HBH
COL5A3	collagen_ type V_ alpha 3	-4.79603	-2.26184	1.31e-12	1.11e-09	7.2673	2	5.65724	5.07559	7.48469	4.9267	7.92534	5.6865	7.19608	5.27404	9.23598	5.79783	7.58713	5.39312	8.39909	4.02825	8.60628	4.13043	8.75063	6.85532	9.90315	4.17063	6.92355	4.73974	6.35294	4.86525	6.67644	5.50338	5.78435	6.34124	6.76417	5.65449	50509	-
TMEM97	transmembrane protein 97	-4.78348	-2.25806	3.7e-13	4.01e-10	8.7023	1	7.97182	7.28934	7.19785	6.84922	10.1191	6.77578	10.5956	7.20466	10.6913	7.2158	10.3494	7.47581	10.0402	7.15048	10.4391	6.81926	9.19327	6.40377	9.88341	6.5129	6.88362	6.5339	7.16629	6.30715	7.50892	6.86219	7.00243	6.3977	7.61903	6.80204	27346	MAC30
APOC1	apolipoprotein C-I	-4.78275	-2.25784	7.92e-16	3.15e-12	5.3053	2	4.99929	2.47109	5.52408	3.09825	6.37172	2.38082	5.33549	4.28477	6.349	3.5028	7.53297	3.54049	6.21793	2.54517	6.68772	3.69229	6.33989	4.57404	6.6341	4.07346	5.66402	2.64973	5.89023	2.72886	4.48707	4.17488	4.25081	4.79144	5.62288	3.30547	341	APO-CI, APOC-I
ROS1	ROS proto-oncogene 1 _ receptor tyrosine kinase	-4.74695	-2.247	5.1e-09	1.12e-06	6.5062	2	4.06729	5.03617	4.92404	3.85267	6.85008	4.01347	8.69837	4.69445	8.75546	6.15249	8.00527	5.00663	8.2297	3.52101	7.93718	4.27417	7.78421	3.21689	8.3212	2.65044	4.13487	3.9549	4.17351	3.8212	3.28761	4.06152	4.32102	4.46144	3.44668	4.3749	6098	MCF3, ROS, C-ROS-1
BEGAIN	brain-enriched guanylate kinase-associated	-4.65906	-2.22004	8.33e-09	1.64e-06	2.6877	2	1.89449	0.932761	1.97668	0.880037	4.557	2.38082	4.39241	1.27645	5.29926	1.30832	3.74398	0	4.05651	0	2.91533	0	3.22977	1.91301	4.35901	1.1197	2.43779	1.21342	2.67413	1.17054	0.981038	0.750588	0.963007	1.38832	3.44668	2.56973	57596	-
TMEM92	transmembrane protein 92	-4.64311	-2.21509	9.03e-12	5.13e-09	5.3366	2	3.97055	3.19855	5.36189	3.3568	7.00813	0	6.39456	4.38639	6.98487	2.22999	6.3503	2.47461	6.638	2.54517	6.17652	3.05997	6.66639	4.0793	7.26257	3.29243	5.66402	3.44514	4.55012	3.54017	5.17232	4.3298	3.83705	4.10244	4.75467	5.06971	162461	-
KLK4	kallikrein-related peptidase 4	-4.63394	-2.21224	1.33e-07	1.58e-05	3.7801	2	0.626283	3.04813	2.29704	2.12489	5.20539	2.12654	4.47583	0.775017	5.29926	1.68473	4.73781	0	4.8855	1.3853	3.59989	1.50329	6.58857	3.1054	6.4315	0.665856	2.10889	0	2.86387	0	1.55962	2.53041	1.53542	2.54923	3.86957	0.99088	9622	AI2A1, ARM1, EMSP, EMSP1, KLK-L1, PRSS17, PSTS, KALLIKREIN
PDE7B	phosphodiesterase 7B	-4.60835	-2.20425	2.31e-08	3.88e-06	4.1862	2	1.66645	1.4946	4.1405	1.81609	5.65113	1.81763	6.16249	1.94292	6.29472	2.78787	5.73471	2.26258	5.64263	3.30267	5.87252	3.05997	5.49798	2.85267	5.18691	0	4.30575	1.86304	2.45561	0.700864	2.29147	3.0887	0	3.0496	1.79735	1.57279	27115	BA472E5.1
2019-09-03	septin 3	-4.57585	-2.19404	3.13e-12	2.19e-09	4.4201	2	3.27759	1.4946	4.5551	1.42269	5.62696	1.42403	5.69009	3.78678	6.28083	3.30147	5.35232	0.815325	6.06515	1.3853	5.23445	2.70147	5.20204	3.74918	5.60636	2.50895	5.56652	2.64973	4.55012	2.58588	4.21179	1.89914	3.83705	4.23229	4.09531	3.5682	55964	SEP3, BK250D10.3
IGFL3	IGF-like family member 3	-4.52796	-2.17886	1.48e-06	0.000115	9.2465	2	2.68613	6.30684	3.67168	3.76621	11.4512	5.4006	10.9872	4.17545	11.3948	6.8135	11.741	7.93134	11.3921	6.32194	11.3021	7.79509	9.18196	2.85267	9.24351	3.00686	2.10889	2.48956	2.45561	1.52428	0.981038	3.0887	1.53542	2.08253	4.09531	2.984	388555	UNQ483
C6orf223	chromosome 6 open reading frame 223	-4.40741	-2.13993	8.6e-08	1.1e-05	5.5258	2	3.10604	4.86674	2.78067	1.81609	7.54812	4.80392	7.55852	1.64783	7.87202	4.86067	6.82617	4.42705	6.79642	3.30267	6.38292	4.34101	6.59995	1.91301	6.71576	1.74245	3.83333	1.57449	5.84591	2.04523	2.77469	2.6915	3.83705	1.77678	2.84589	2.984	221416	-
SHF	Src homology 2 domain containing F	-4.29792	-2.10364	1.8e-08	3.15e-06	9.2503	1	6.13	7.65079	6.82708	5.79773	11.2219	6.3688	10.1291	7.2989	11.4436	8.38352	10.7942	8.49015	10.9624	7.00415	10.9383	7.90961	10.311	7.00262	10.779	6.4072	7.64252	6.92691	6.99424	7.2573	6.11211	7.10324	6.5108	7.07107	6.76417	7.20099	90525	-
PRKCDBP	protein kinase C_ delta binding protein	-4.28876	-2.10056	2.23e-12	1.66e-09	7.4164	1	5.65724	6.22155	6.91159	6.0381	9.66013	6.39789	7.87123	5.51747	8.99131	6.61047	8.82226	5.9666	8.96016	5.71678	8.52659	6.0869	8.3367	5.79772	8.75214	5.15397	7.44635	4.87557	7.28722	5.61947	5.89319	4.67634	6.58401	5.19339	5.29921	5.62593	112464	CAVIN3, HSRBC, SRBC, CAVIN-3
MMP7	matrix metallopeptidase 7	-4.24781	-2.08672	8.7e-08	1.1e-05	7.9897	2	5.45756	6.86336	6.65563	5.68441	8.50501	4.46216	7.77159	6.25528	8.96765	7.67258	9.77181	4.93678	9.34511	5.47674	8.92066	6.462	10.7891	5.66638	10.4952	5.94041	6.33138	5.71249	5.43173	4.73577	5.51723	4.63731	5.0971	5.48153	3.7419	6.56686	4316	MMP-7, MPSL1, PUMP-1
CCK	cholecystokinin	-4.22631	-2.0794	3.51e-06	0.000226	1.4011	2	0.626283	0.932761	0.984495	0	4.70286	0	1.16998	0	3.78578	0	3.64532	0	3.084	0	2.78442	1.90778	2.0171	0.758289	1.29041	0	1.0735	0	0.923789	0	0.981038	0.750588	0	0	1.16215	0	885	-
C7orf33	chromosome 7 open reading frame 33	-4.21628	-2.07597	6.38e-07	5.59e-05	2.2511	2	0.626283	0	2.55903	0	3.22464	0	3.94261	0.775017	4.81195	2.22999	4.68911	2.47461	2.96341	0	4.1177	0	2.97404	1.62033	2.59954	0	1.68215	1.21342	2.19798	0.700864	1.55962	0.750588	0.963007	1.38832	2.23686	0	202865	-
LY6G6C	lymphocyte antigen 6 complex_ locus G6C	-4.21537	-2.07566	2.91e-07	2.99e-05	10.2489	1	6.18493	8.84551	6.80199	6.11008	12.3106	8.2197	11.8567	7.95711	12.4982	9.10011	11.9096	9.51236	12.1529	8.55401	12.0931	8.76471	10.7539	7.2389	11.1725	7.67609	7.6184	7.74589	6.43001	7.33201	6.1718	6.9121	6.59822	7.7342	6.96336	7.35685	80740	C6ORF24, G6C, NG24
KISS1R	KISS1 receptor	-4.21467	-2.07542	4.41e-12	2.69e-09	5.4578	2	5.57737	4.11775	5.01417	0.880037	7.49569	4.01347	6.05809	2.8877	7.37324	2.9344	5.52874	3.44308	7.19488	1.77332	4.7291	4.05281	6.28456	4.34777	6.50224	3.85696	5.04576	4.73974	5.30651	4.73577	5.24822	3.57527	5.59897	4.65913	6.32599	4.44197	84634	AXOR12, CPPB1, GPR54, HH8, HOT7T175, KISS-1R
CES5A	carboxylesterase 5A	-4.15716	-2.0556	7.74e-08	1.03e-05	4.5756	2	1.89449	3.57375	5.13962	1.42269	5.4175	2.12654	6.19977	2.18778	6.52435	2.9344	6.59461	4.01738	5.92687	3.87816	6.63169	4.27417	5.47345	2.98456	4.86773	1.46442	4.89325	1.86304	3.03152	1.17054	2.96665	2.34905	0.963007	2.73598	3.07509	0.99088	221223	CAUXIN, CES4C1, CES5, CES7, HEL126
CLMP	CXADR-like membrane protein	-4.08289	-2.02959	3.1e-07	3.14e-05	5.2283	2	2.68613	4.19137	4.29233	4.15449	6.81842	4.01347	7.64215	0	6.08684	5.12764	6.3503	1.71329	6.54651	3.41597	6.41647	3.58608	7.4235	2.36426	6.73547	3.10846	4.13487	2.64973	3.31772	2.58588	2.29147	2.6915	2.26227	3.52548	3.44668	1.57279	79827	ACAM, ASAM, CSBM, CSBS
FAM132A	family with sequence similarity 132_ member A	-4.05783	-2.02071	9.98e-09	1.9e-06	6.6731	2	4.11332	5.56545	5.25503	4.61658	8.27164	3.6762	6.71949	5.42497	8.93475	6.49713	8.16959	4.97213	8.22643	3.95516	7.77854	5.98609	7.79414	4.19275	8.50469	4.42813	6.04804	3.35503	6.87801	4.83395	3.96424	4.17488	4.78567	5.09439	5.05248	4.3749	388581	C1QDC2, C1QTNF12, CTRP12
GIMAP8	GTPase_ IMAP family member 8	-4.04579	-2.01642	1.21e-07	1.47e-05	2.1265	2	1.66645	0.932761	3.97079	2.59515	3.34805	1.81763	4.05537	0	2.25169	0.797647	3.30099	0	3.084	0.852901	2.09492	1.50329	3.72146	0.758289	3.80877	0	2.70546	0	2.45561	0.700864	2.55322	1.6076	0	2.08253	3.07509	0	155038	IAN-9, IAN6, IAN9, IANT
SELE	selectin E	-4.02057	-2.0074	5.19e-07	4.76e-05	2.2422	2	0.626283	0.932761	2.78067	0.880037	3.56709	0	2.42634	2.18778	3.86242	0	4.22588	2.01392	2.68699	0.852901	3.8819	0.939183	4.0875	2.36426	4.35901	0.665856	2.10889	0.730693	1.88412	0	2.29147	0	0	0.85509	2.84589	1.57279	6401	CD62E, ELAM, ELAM1, ESEL, LECAM2
ITM2C	integral membrane protein 2C	-3.99047	-1.99656	7.34e-10	2.4e-07	7.0591	2	5.79073	6.14949	6.0778	6.14476	8.85374	6.24619	7.98594	5.19221	9.34349	6.32182	8.50113	6.01824	8.5428	4.50878	8.1973	5.27109	7.73861	5.28657	8.43708	4.89428	5.63225	4.12812	6.35294	4.10956	5.69047	4.75137	5.54132	4.83297	5.6936	5.70997	81618	BRI3, BRICD2C, E25, E25C, ITM3
POLN	polymerase (DNA directed) nu	-3.98243	-1.99365	3.42e-11	1.57e-08	5.5589	2	3.81209	3.95818	5.17913	2.59515	7.15901	2.38082	6.33995	3.62986	7.77127	2.78787	7.42559	4.47712	7.11928	4.45676	6.10973	4.58111	5.97076	4.87533	6.07713	3.96926	5.22687	3.25892	4.97733	4.34978	5.35506	4.00131	5.0971	4.79144	5.34386	4.56743	353497	POL4P
LIPM	lipase_ family member M	-3.94419	-1.97973	5.52e-06	0.000316	3.518	2	0	1.4946	2.78067	0	4.83532	1.42403	6.12422	0	6.19452	2.9344	4.83053	1.71329	5.04257	2.54517	5.07554	3.21054	4.57639	1.25276	3.27439	1.1197	2.93115	0.730693	0.923789	0	0.981038	2.34905	0	0.85509	1.79735	0.99088	340654	LIPL3, BA304I5.1
THEG	theg spermatid protein	-3.90445	-1.96512	7.25e-06	0.000389	4.4769	2	0.626283	3.33475	2.78067	1.81609	6.48362	2.59694	6.51777	0	6.19452	3.67945	6.03669	2.97035	6.05042	3.41597	5.73748	2.70147	5.7018	2.36426	6.59148	0	1.68215	0.730693	2.86387	0	1.97146	1.24181	0	3.42041	2.23686	0	51298	CT56, THEG1
PCDHGC5	protocadherin gamma subfamily C_ 5	-3.89089	-1.9601	5.07e-06	0.000301	3.4754	2	0	2.21279	0.984495	0.880037	4.07562	1.42403	4.43472	0.775017	6.25263	1.68473	4.58649	0.815325	5.28828	0	4.41187	0.939183	5.54583	1.25276	5.64856	2.89755	1.0735	0.730693	0	2.72886	1.55962	1.89914	2.26227	2.33467	1.16215	2.56973	56097	PCDH-GAMMA-C5
SRPX	sushi-repeat containing protein_ X-linked	-3.84704	-1.94375	2.48e-11	1.21e-08	2.9723	2	3.35627	2.47109	3.97079	2.12489	3.66529	0.881014	3.28549	1.94292	3.52791	2.22999	4.78491	1.33307	4.05651	1.3853	4.1177	0	2.663	2.15621	4.83155	1.46442	2.93115	1.57449	2.67413	2.85893	2.77469	1.24181	4.17701	2.73598	3.7419	1.9863	8406	DRS, ETX1, HEL-S-83P, SRPX1
PDZRN3	PDZ domain containing ring finger 3	-3.81692	-1.93241	4.4e-07	4.13e-05	6.6755	2	3.10604	5.32495	5.01417	4.9267	7.64757	4.22304	7.85963	5.7257	8.85494	5.9434	8.00029	5.8191	7.56491	4.1642	8.10087	5.52214	8.58016	3.82153	8.79269	4.0223	6.02376	2.79388	5.40143	3.68752	3.96424	3.73168	2.74334	4.95085	3.7419	5.70997	23024	LNX3, SEMACAP3, SEMCAP3
COMP	cartilage oligomeric matrix protein	-3.77538	-1.91662	5.85e-07	5.27e-05	4.2252	2	3.19436	1.4946	5.64187	1.81609	4.70286	0.881014	4.47583	3.02008	6.58214	0	5.0392	2.26258	5.26296	0	6.81055	1.90778	2.47808	4.29793	2.59954	3.53072	4.78182	1.57449	4.37407	3.08844	3.13604	2.6915	3.5164	3.95974	4.68695	2.79168	1311	EDM1, EPD1, MED, PSACH, THBS5
POSTN	periostin_ osteoblast specific factor	-3.76691	-1.91338	2.2e-05	0.000897	3.6844	2	1.06154	1.4946	1.97668	2.94923	4.557	2.95109	4.15996	0	5.98768	2.44084	6.99594	2.65944	5.36169	0	5.52838	0.939183	4.97623	0.758289	0.784913	0	1.68215	1.21342	1.88412	0	0	1.24181	0	0	1.79735	0	10631	OSF-2, OSF2, PDLPOSTN, PN
PALD1	phosphatase domain containing_ paladin 1	-3.7553	-1.90893	2.31e-06	0.000162	6.0541	2	3.27759	5.77153	5.42897	2.59515	7.2249	4.88834	7.27971	2.18778	8.16083	6.15249	6.6843	5.00663	7.56491	3.30267	6.90811	3.69229	8.15196	4.34777	8.21287	1.97546	5.49765	2.79388	4.2435	1.80814	3.77194	3.80396	2.26227	4.29308	3.60183	0.99088	27143	KIAA1274, PALD
TNNT2	troponin T type 2 (cardiac)	-3.73889	-1.90261	9.48e-06	0.000477	7.7591	2	2.68613	7.12057	3.55641	4.84468	10.1406	6.3688	9.04756	4.38639	10.0969	6.50888	9.18913	7.01556	9.85236	6.3364	8.91285	6.50636	8.32647	2.54606	9.23488	4.30512	3.45164	5.08627	4.17351	3.8212	2.77469	3.73168	3.39145	3.52548	4.37896	3.88982	7139	CMD1D, CMH2, CMPD2, LVNC6, RCM3, TNTC, CTNT
ANKFN1	ankyrin-repeat and fibronectin type III domain containing 1	-3.69171	-1.88429	6.58e-07	5.75e-05	3.4673	2	1.06154	2.21279	4.29233	2.12489	4.60728	3.35873	5.11904	0	6.0215	1.98297	4.91765	2.82325	5.07203	2.73181	4.36682	2.89183	4.02135	2.36426	4.25359	1.74245	3.12626	0.730693	2.45561	0.700864	2.29147	1.6076	1.53542	2.54923	2.84589	0	162282	-
METTL7B	methyltransferase like 7B	-3.69133	-1.88414	4.04e-06	0.000252	2.2283	2	1.89449	0	4.29233	0	3.84365	0	3.08755	0.775017	2.64786	0	4.00496	2.01392	4.11429	0.852901	4.1177	0.939183	2.26592	2.7075	0	1.1197	1.68215	1.57449	2.86387	0	2.77469	0.750588	0.963007	2.33467	3.07509	0	196410	ALDI
HBA2	hemoglobin_ alpha 2	-3.6865	-1.88225	2.2e-05	0.000898	3.2456	2	2.8031	1.4946	0.984495	0	5.4175	0	4.30387	2.74194	6.54775	0	4.58649	3.10382	4.55083	0	4.79859	2.48213	3.34243	0	3.04087	1.46442	2.10889	2.10339	1.48243	0	1.55962	0.750588	0.963007	1.77678	0	0	3040	HBA-T2, HBH
IGSF9B	immunoglobulin superfamily_ member 9B	-3.64702	-1.86672	9.78e-06	0.000489	3.5297	2	0.626283	3.19855	0.984495	2.12489	4.74838	2.78486	5.17002	2.18778	5.72577	2.62477	4.58649	2.65944	4.37288	1.3853	4.65609	0	5.86157	0	5.49513	2.35207	3.45164	0.730693	1.48243	0	0.981038	0	1.94415	2.54923	2.23686	1.57279	22997	-
PLA2G2F	phospholipase A2_ group IIF	-3.63416	-1.86162	1.72e-07	1.89e-05	7.8814	1	5.07103	6.72146	6.0778	4.75772	9.7327	6.2301	8.79492	6.98737	10.2294	7.28573	8.64531	6.52612	9.04617	5.25103	8.11115	6.59117	9.60675	6.34362	9.87343	5.71734	7.25097	5.61879	6.11226	5.26786	5.28472	5.99521	5.85704	6.43863	5.82542	6.90072	64600	-
IGFBP6	insulin-like growth factor binding protein 6	-3.60413	-1.84965	7.75e-07	6.65e-05	7.8843	1	6.0845	6.77033	5.92353	7.17704	10.4642	6.96261	7.68221	5.83758	8.53906	7.02454	8.11993	4.74575	9.44981	6.64607	8.09398	6.18111	10.7099	6.39194	9.375	5.92657	5.38776	5.69423	6.30464	5.74255	5.35506	5.6866	5.68135	5.76515	4.94062	5.47396	3489	IBP6
CYP4A11	cytochrome P450_ family 4_ subfamily A_ polypeptide 11	-3.60166	-1.84866	3.94e-07	3.79e-05	3.0103	2	1.89449	1.89793	2.97276	2.12489	3.56709	1.42403	4.80099	2.18778	4.36208	1.98297	4.78491	2.47461	4.74624	2.54517	4.53914	0.939183	4.52956	2.54606	3.37835	1.74245	2.43779	1.57449	4.43517	0	0	1.24181	1.53542	1.77678	1.16215	1.9863	1579	CP4Y, CYP4A2, CYP4AII
CMTM7	CKLF-like MARVEL transmembrane domain containing 7	-3.56322	-1.83318	3.41e-07	3.33e-05	4.8468	2	3.19436	3.19855	3.14225	4.01146	6.70755	3.47249	5.48391	2.8877	6.03812	5.00032	5.93594	3.94806	6.78756	2.73181	6.58328	2.89183	6.4191	3.32038	6.59148	2.65044	3.83333	3.35503	2.67413	1.80814	3.55001	2.83639	2.26227	3.62342	3.44668	2.984	112616	CKLFSF7
TLDC2	TBC/LysM-associated domain containing 2	-3.56203	-1.8327	6.26e-07	5.51e-05	3.5635	2	2.41918	3.04813	3.67168	0.880037	5.30014	2.38082	4.43472	1.27645	5.43092	1.98297	5.35232	1.71329	5.04257	3.17972	4.76427	1.50329	3.72146	4.2463	3.73236	1.1197	4.66104	1.21342	3.44201	1.17054	3.55001	1.24181	0.963007	3.0496	3.44668	0	140711	C20ORF118
PIPOX	pipecolic acid oxidase	-3.56198	-1.83268	2.99e-08	4.65e-06	3.6392	2	2.26456	2.47109	4.29233	0.880037	4.00236	0.881014	4.10862	2.74194	5.18454	2.44084	5.68591	2.01392	3.86782	1.77332	5.25931	3.05997	4.37921	3.67302	5.44812	1.97546	3.71697	2.79388	3.03152	1.52428	3.77194	0.750588	2.26227	3.52548	4.19618	2.56973	51268	LPIPOX
PMP22	peripheral myelin protein 22	-3.5503	-1.82794	8.34e-08	1.09e-05	3.9699	2	1.66645	3.45919	3.87781	2.59515	5.47278	2.38082	4.55468	3.71046	5.97047	3.83681	5.58305	2.01392	5.1009	2.54517	5.42229	1.90778	5.17187	2.15621	5.44812	0.665856	2.93115	2.30936	3.66245	1.80814	3.55001	2.6915	2.52277	2.08253	3.27282	3.44281	5376	CMT1A, CMT1E, DSS, GAS-3, HMSNIA, HNPP, SP110
CYTH4	cytohesin 4	-3.54442	-1.82555	1.84e-05	0.000791	1.4651	2	1.06154	0.932761	2.97276	0	4.45087	0.881014	2.58504	0	2.81144	0.797647	2.44041	0	1.89525	0	3.14614	0	2.97404	2.7075	2.41628	0.665856	1.0735	0	0.923789	0	0.981038	0	0.963007	0.85509	1.79735	0.99088	27128	CYT4, DJ63G5.1, PSCD4
LHX1	LIM homeobox 1	-3.51438	-1.81327	1.84e-06	0.000137	4.6531	2	1.66645	3.87124	3.67168	4.40396	5.30014	3.23522	5.75832	2.74194	5.98768	4.78542	5.55615	2.97035	6.1226	3.41597	6.05399	3.47143	6.28456	2.7075	7.26257	1.97546	2.70546	2.10339	4.37407	0.700864	2.55322	2.53041	2.74334	2.54923	4.19618	0.99088	3975	LIM-1, LIM1
P2RX6	purinergic receptor P2X_ ligand gated ion channel_ 6	-3.49422	-1.80497	7.31e-12	4.25e-09	4.2577	2	3.43089	2.47109	4.92404	2.78303	5.47278	2.95109	4.05537	3.5445	5.78604	3.67945	4.68911	3.44308	5.12921	1.77332	5.42229	1.50329	4.86746	4.34777	5.8787	1.74245	4.30575	3.44514	4.43517	3.37604	5.42213	2.83639	4.32102	3.30708	4.37896	2.56973	9127	P2RXL1, P2X6, P2XM
TNFRSF19	tumor necrosis factor receptor superfamily_ member 19	-3.49054	-1.80345	5.36e-06	0.000313	2.9174	2	1.89449	1.89793	3.87781	0	3.75722	0	4.00009	0	4.46398	1.98297	4.87475	1.33307	3.9335	0	4.7291	3.47143	4.21135	1.62033	4.25359	0.665856	3.29811	1.86304	2.86387	2.58588	2.55322	1.24181	0	2.9013	1.79735	0	55504	TAJ, TAJ-ALPHA, TRADE, TROY
SCART1	scavenger receptor protein family member	-3.48597	-1.80156	1.88e-06	0.000138	6.7223	2	3.50183	5.3573	3.77843	4.46012	7.39196	5.90489	9.23432	4.23114	9.02504	5.67813	7.37261	5.87619	7.88428	4.02825	8.18113	3.05997	7.39113	5.31191	8.40667	4.89428	5.13916	4.80925	3.66245	5.69108	4.42301	4.3298	5.75928	5.86863	3.98685	5.26758	619207	-
TAGLN3	transgelin 3	-3.45278	-1.78776	6.45e-05	0.002034	7.3336	2	2.55882	6.41836	3.43112	3.67422	9.42107	5.4006	8.82107	3.02008	9.59019	6.01102	9.15144	6.26621	8.95027	6.27765	8.6656	6.72231	9.078	1.62033	8.59377	1.46442	4.66104	0	1.88412	2.04523	2.29147	2.34905	0.963007	3.42041	2.23686	2.79168	29114	NP22, NP24, NP25
SLC2A6	solute carrier family 2 (facilitated glucose transporter)_ member 6	-3.42794	-1.77734	2.02e-10	7.42e-08	7.3236	1	6.27882	6.35569	6.42861	6.50661	8.54748	6.24619	8.97952	6.11429	8.66207	6.19672	8.53941	5.89473	8.78887	4.28843	8.72259	5.20086	8.14421	5.95071	8.78088	6.14557	6.33138	5.86718	5.60127	6.18844	6.84479	5.79697	7.00243	6.32678	6.18583	6.24873	11182	GLUT6, GLUT9, HSA011372
FXYD6	FXYD domain containing ion transport regulator 6	-3.4229	-1.77522	8.79e-06	0.000448	4.3329	2	2.55882	3.04813	5.01417	0.880037	6.02854	0.881014	4.83298	1.27645	6.9325	1.68473	4.73781	3.10382	5.77392	2.54517	5.60796	2.70147	5.3168	4.76958	5.06757	0	3.941	2.30936	4.02242	0.700864	3.28761	3.49021	0.963007	4.56367	4.54116	0.99088	53826	-
LINC00086	small integral membrane protein 10 like 2A	-3.41326	-1.77115	3.35e-06	0.000219	3.9544	2	2.55882	3.33475	0.984495	2.78303	5.57738	4.15651	5.90096	1.64783	5.80558	3.59383	5.6354	2.26258	5.43155	2.33074	5.60796	1.90778	4.43109	1.62033	4.97111	1.1197	1.0735	1.57449	3.31772	2.97824	2.77469	1.6076	3.39145	3.18408	2.57328	0.99088	399668	LED, LINC00086, NCRNA00086, SMIM10L2A
RPSAP52	ribosomal protein SA pseudogene 52	-3.40468	-1.76752	6.22e-06	0.000349	2.1751	2	2.26456	0.932761	1.97668	0	4.14534	0.881014	2.85806	2.74194	2.25169	1.30832	3.30099	0	3.9335	0	2.91533	0.939183	4.02135	1.62033	2.90822	0.665856	3.12626	0	2.19798	0.700864	3.55001	0	1.94415	3.30708	2.23686	0	204010	RPSA_17_1251
CITED1	Cbp/p300-interacting transactivator_ with Glu/Asp-rich carboxy-terminal domain_ 1	-3.39655	-1.76407	3.04e-05	0.001151	3.2205	2	0.626283	3.19855	0.984495	0.880037	6.04688	2.12654	3.88273	0	5.12357	1.98297	5.11489	2.01392	4.91831	1.77332	4.00461	1.90778	3.22977	1.62033	4.59309	0.665856	3.29811	0	1.48243	2.04523	2.77469	0.750588	0	2.9013	0	1.9863	4435	MSG1
MMP1	matrix metallopeptidase 1	-3.37976	-1.75692	2.84e-05	0.001091	7.4643	2	5.80482	7.33066	4.49375	6.27572	9.43506	7.07495	7.17127	2.39705	8.81693	6.18213	8.98491	6.33571	9.37496	6.47359	8.69095	6.462	9.71273	0.758289	9.07388	1.74245	5.13916	2.10339	5.51899	4.92588	5.17232	2.83639	5.78435	3.52548	5.50984	3.88982	4312	CLG, CLGN
LRRC10B	leucine rich repeat containing 10B	-3.37084	-1.75311	2.78e-05	0.001074	1.6323	2	0	1.89793	2.55903	0	2.37127	0.881014	2.728	1.27645	3.43059	0	2.44041	0	2.68699	0	2.78442	0.939183	3.34243	2.15621	4.19784	0	1.68215	1.86304	2.19798	0.700864	0.981038	0.750588	0	0	2.84589	0	390205	-
SNCB	synuclein_ beta	-3.36305	-1.74977	3.08e-05	0.001158	1.8805	2	0.626283	2.21279	0.984495	0	4.21184	0	2.85806	1.94292	3.52791	0.797647	1.87057	0.815325	3.29859	0	1.20715	2.22335	3.44692	0.758289	3.37835	0	4.30575	0	2.45561	1.17054	1.55962	0.750588	0	0.85509	1.16215	0.99088	6620	-
SERPINA4	serpin peptidase inhibitor_ clade A (alpha-1 antiproteinase_ antitrypsin)_ member 4	-3.33998	-1.73984	3.26e-06	0.000213	3.0935	2	2.55882	1.4946	4.21841	1.42269	3.08969	0	2.728	2.18778	4.81195	0.797647	5.28838	2.26258	4.37288	1.77332	3.51985	2.89183	3.34243	3.21689	4.25359	1.1197	4.38415	0	3.66245	0	2.55322	1.6076	0	2.9013	4.09531	2.984	5267	KAL, KLST, KST, PI-4, PI4, KALLISTATIN
CDHR1	cadherin-related family member 1	-3.33565	-1.73797	3.62e-05	0.00132	5.9063	2	2.09136	5.50898	5.13962	4.01146	7.18407	5.86378	8.36259	0.775017	7.86273	5.29975	6.85956	5.13694	7.11928	4.40281	7.10612	3.58608	6.91435	4.48774	7.87804	1.1197	3.71697	2.10339	3.31772	1.17054	3.28761	2.6915	1.53542	3.0496	4.29046	1.57279	92211	CORD15, PCDH21, PRCAD, RP65
PSAPL1	prosaposin-like 1 (gene/pseudogene)	-3.31176	-1.7276	7.31e-06	0.000391	10.6877	1	7.32924	9.77677	7.80816	7.37263	12.0093	8.84985	11.789	9.46459	12.8828	10.1503	12.2288	10.0937	12.1393	8.87703	12.4621	9.55533	12.1988	8.22748	12.1644	8.6911	8.59425	8.75359	7.11119	8.46667	7.2382	8.48081	7.81411	8.13376	7.83778	9.52669	768239	-
KRT79	keratin 79_ type II	-3.29466	-1.72013	4.5e-05	0.001552	9.4913	1	5.3463	8.84836	5.52408	6.01953	10.6637	7.49406	10.4562	6.86066	11.8372	9.17204	11.5544	9.32342	10.493	7.47202	11.8133	8.66062	10.6551	5.70514	10.732	6.23815	6.77141	6.37104	6.61303	6.35203	4.82114	6.14186	4.92744	7.05361	4.09531	6.45764	338785	K6L, KRT6L
MIR4697HG	MIR4697 host gene	-3.28672	-1.71665	5.07e-05	0.001696	2.6147	2	2.09136	2.47109	0.984495	1.42269	2.58706	1.81763	2.97736	0.775017	4.36208	2.62477	2.65845	2.26258	2.83181	0.852901	2.64044	0	5.10956	0	5.8428	0.665856	1.68215	0	2.67413	0	0	1.89914	2.74334	1.77678	1.16215	1.57279	283174	LINC00947
HBB	hemoglobin_ beta	-3.27263	-1.71045	2.63e-05	0.001022	1.9717	2	1.06154	1.4946	2.78067	0.880037	4.50491	1.81763	1.80742	0	3.2137	0	2.18345	0.815325	3.19528	1.3853	3.74778	0	3.54436	2.98456	2.90822	0	2.10889	0	2.67413	0	2.55322	2.14156	0.963007	0.85509	2.23686	0	3043	CD113T-C, BETA-GLOBIN
ADTRP	androgen-dependent TFPI-regulating protein	-3.26395	-1.70662	1.34e-05	0.000616	7.3357	2	4.32376	6.29018	4.49375	5.79773	8.47825	5.4006	8.88732	5.13496	9.1041	6.96611	9.37379	6.60705	8.8833	6.64607	9.13733	6.8654	8.80078	4.73253	8.37245	4.67995	5.46194	4.77492	5.33885	3.75591	4.48707	3.93848	3.92984	5.6303	3.27282	5.19165	84830	AIG1L, C6ORF105, DJ413H6.1
PLA2G7	phospholipase A2_ group VII (platelet-activating factor acetylhydrolase_ plasma)	-3.24566	-1.69851	0.000149	0.00392	4.4706	2	0	3.67988	2.29704	2.94923	5.55193	2.95109	6.18745	0	7.08421	4.16833	6.48477	3.79855	6.03555	2.73181	6.33695	2.89183	5.26057	0.758289	5.54065	0	3.83333	0	2.19798	0.700864	0.981038	0.750588	0.963007	2.54923	0	0	7941	LDL-PLA2, LP-PLA2, PAFAD, PAFAH
PRKCQ-AS1	PRKCQ antisense RNA 1	-3.23988	-1.69594	4.27e-05	0.001492	1.5095	2	2.41918	0.932761	1.56425	0.880037	1.41661	0	1.52363	1.94292	0.809399	0	1.4705	0.815325	1.23874	1.3853	1.56716	0	2.663	0.758289	1.96049	0.665856	1.68215	0	2.19798	0	4.48707	0.750588	3.63139	2.33467	3.44668	0	439949	-
STK32C	serine/threonine kinase 32C	-3.23788	-1.69505	3.26e-11	1.55e-08	4.6389	2	4.3624	3.77873	4.72488	2.12489	6.78604	3.10014	4.70053	3.71046	5.97047	3.18918	5.41356	2.65944	5.66213	0.852901	5.28375	3.97077	5.37093	3.32038	5.09835	3.96926	5.13916	3.9549	4.65658	3.68752	4.66375	4.11931	4.78567	3.18408	5.05248	4.56743	282974	PKE, YANK3
C5orf46	chromosome 5 open reading frame 46	-3.22022	-1.68716	1.89e-05	0.000808	8.107	1	5.36545	7.12996	6.77646	4.84468	9.99711	5.61398	9.31581	6.24178	9.77253	6.8783	10.3688	7.92684	9.73409	7.10896	9.94143	8.43062	8.84687	5.18053	8.42499	5.28995	5.99906	5.657	4.09994	5.77587	5.69047	5.36689	4.38796	5.12815	5.91694	5.53668	389336	SSSP1
DCSTAMP	dendrocyte expressed seven transmembrane protein	-3.20817	-1.68175	0.00011	0.003077	0.9204	2	1.06154	0.932761	0.984495	0	2.11742	0	2.248	1.27645	2.25169	0	2.65845	0	2.13744	0	2.30054	0.939183	3.72146	0	3.37835	0.665856	0	1.21342	0.923789	0	0.981038	0	0	1.38832	0	0.99088	81501	FIND, TM7SF4, HDC-STAMP
KRT17	keratin 17_ type I	-3.18131	-1.66962	7e-08	9.43e-06	17.889	1	16.6153	17.2155	16.8133	15.4296	19.9078	16.9549	18.948	17.1311	19.4673	17.407	19.4192	16.2102	19.4883	15.7583	19.1268	16.3144	18.554	15.9344	18.8188	16.1849	17.3172	16.5809	16.1668	16.5474	16.1522	16.5459	15.9002	17.0227	16.7563	16.6261	3872	K17, PC, PC2, PCHC1
PGLYRP2	peptidoglycan recognition protein 2	-3.17329	-1.66598	4.99e-05	0.001677	5.6328	2	3.43089	5.38893	5.66987	3.09825	7.87493	5.34193	7.23252	0.775017	7.29245	4.0447	6.69667	5.44437	7.11928	4.09783	6.81894	4.87974	6.1671	4.0793	6.96152	0.665856	5.18368	2.48956	4.60433	0	3.42477	3.30337	0	4.35141	4.94062	2.30731	114770	HMFT0141, PGLYRPL, PGRP-L, PGRPL, TAGL-LIKE, TAGL, TAGL-ALPHA, TAGL-BETA
MVD	mevalonate (diphospho) decarboxylase	-3.17138	-1.66511	1.75e-06	0.000131	11.9449	1	10.4191	11.5043	9.9245	10.7964	14.1871	11.2508	13.3707	10.379	13.568	11.1184	13.199	11.4017	13.4567	10.832	13.613	10.83	12.196	9.60917	13.051	9.57197	9.94579	9.85208	10.225	9.70522	9.81673	10.1609	9.66996	9.42401	10.0321	10.1238	4597	FP17780, MDDASE, MPD
IGFN1	immunoglobulin-like and fibronectin type III domain containing 1	-3.16944	-1.66423	7.72e-05	0.002356	6.2057	2	3.10604	6.53608	5.49307	2.94923	6.18571	5.53761	6.4677	0.775017	7.13916	6.23964	5.95666	3.71755	6.33191	2.33074	6.3134	3.88378	8.73265	5.18053	9.57286	1.97546	4.66104	2.48956	4.17351	1.52428	5.21077	3.0887	3.83705	5.34464	4.61589	2.30731	91156	EEF1A2BP1
P2RX5	purinergic receptor P2X_ ligand gated ion channel_ 5	-3.16102	-1.66039	5.53e-05	0.001795	1.5619	2	2.41918	0	2.78067	1.42269	0.875615	0.881014	0.700477	0.775017	0	1.30832	2.84783	0.815325	1.89525	0.852901	1.20715	0	2.26592	2.36426	0.784913	0.665856	1.68215	0.730693	3.44201	1.17054	3.66524	0	3.25464	0.85509	4.09531	0	5026	LRH-1, P2X5, P2X5R
SHC4	SHC (Src homology 2 domain containing) family_ member 4	-3.15697	-1.65854	3.22e-07	3.24e-05	3.9731	2	2.8031	3.19855	4.5551	2.78303	4.83532	3.23522	4.39241	1.94292	5.40553	3.90949	5.18681	2.82325	4.8855	3.52101	4.989	3.34687	5.34412	2.36426	6.29204	2.35207	4.38415	2.48956	3.66245	1.80814	2.55322	3.39981	0.963007	2.08253	3.07509	2.30731	399694	RALP, SHCD
INHBB	inhibin_ beta B	-3.15498	-1.65763	0.00011	0.003071	5.6947	2	1.89449	5.32495	3.67168	2.78303	7.37028	5.04367	7.10731	0.775017	8.25623	5.83562	6.28626	5.31268	7.05434	4.09783	6.7851	4.13043	6.98547	2.7075	7.80529	1.1197	2.70546	0.730693	3.66245	2.72886	0.981038	2.96805	2.52277	1.77678	3.7419	2.30731	3625	-
ITGAX	integrin_ alpha X (complement component 3 receptor 4 subunit)	-3.15386	-1.65712	9.45e-05	0.002739	5.4797	2	2.91131	5.29186	5.39582	1.81609	6.53647	4.22304	7.704	0.775017	7.90863	4.89687	5.87193	5.19793	6.67687	3.52101	5.70164	4.20409	6.67717	4.69451	7.4768	0.665856	4.59664	3.04506	3.44201	0.700864	3.55001	1.89914	0	4.23229	3.98685	0	3687	CD11C, SLEB6
ASIC4	acid sensing (proton gated) ion channel family member 4	-3.13921	-1.6504	0.000105	0.002979	3.7103	2	1.66645	3.45919	4.36264	2.78303	5.83114	2.78486	4.59255	0.775017	5.66288	3.40564	5.71051	4.01738	4.85192	1.3853	4.65609	2.48213	4.79011	2.36426	5.32342	1.1197	2.70546	0.730693	1.88412	0	0.981038	0.750588	0	0	2.23686	0	55515	ACCN4, BNAC4
LINC00659	long intergenic non-protein coding RNA 659	-3.13375	-1.64789	0.000178	0.00448	1.3744	2	0.626283	1.4946	0.984495	0	3.66529	0.881014	3.37513	0	3.09167	1.68473	2.84783	1.33307	3.99632	0	3.14614	1.50329	2.0171	0.758289	0.784913	0	0	0	0.923789	0	0.981038	0	0	1.38832	1.79735	0	100652730	-
NRGN	neurogranin (protein kinase C substrate_ RC3)	-3.1129	-1.63826	5.36e-05	0.001762	3.3434	2	1.39547	2.21279	0	0.880037	5.91337	3.10014	5.09285	1.64783	4.3083	3.18918	4.47601	2.97035	4.98178	2.89705	4.86489	2.22335	4.2695	2.15621	4.40896	2.17602	1.0735	1.21342	3.31772	0.700864	0	0	2.74334	2.08253	2.57328	0.99088	4900	RC3, HNG
SHISA2	shisa family member 2	-3.10183	-1.63312	5.02e-06	0.0003	4.8418	2	3.43089	2.21279	4.05814	1.42269	5.60238	0.881014	5.52366	3.5445	6.61574	2.9344	5.89358	1.71329	6.15048	2.54517	5.95092	1.90778	6.24162	3.67302	6.26517	2.65044	5.04576	3.04506	5.40143	2.97824	4.60723	4.71434	4.5132	3.88272	4.09531	6.09049	387914	C13ORF13, PRO28631, TMEM46, WGAR9166, BA398O19.2, HSHISA
KLK6	kallikrein-related peptidase 6	-3.08911	-1.62719	2e-06	0.000143	12.4601	1	10.3354	12.1468	10.3154	10.9298	14.1442	12.2233	13.8503	10.6647	14.212	11.8695	13.3806	11.3518	13.87	11.6979	13.588	11.8831	14.1332	9.8313	13.7945	10.23	11.3045	10.1479	10.5908	10.274	10.3595	10.2758	10.832	10.1598	11.4695	10.3025	5653	BSSP, KLK7, PRSS18, PRSS9, SP59, HK6
THRSP	thyroid hormone responsive	-3.07569	-1.62091	0.000257	0.00586	3.7628	2	0.626283	0.932761	3.77843	0.880037	3.56709	2.38082	5.82346	0.775017	6.13398	0.797647	6.16687	4.01738	4.91831	3.41597	6.41647	3.88378	1.71623	2.36426	3.27439	0	1.0735	0	1.48243	0.700864	2.29147	1.24181	0.963007	1.38832	1.16215	0	7069	LPGP1, LPGP, S14, SPOT14, THRP
PAEP	progestagen-associated endometrial protein	-3.06093	-1.61397	8.05e-07	6.86e-05	7.5127	1	5.79073	6.8176	6.30906	3.57598	9.44719	5.66273	7.63309	7.44148	9.35846	5.52463	8.6163	4.82523	9.04617	4.50878	7.49431	5.08865	8.46356	6.08903	8.50469	6.3461	8.50934	6.27602	5.91188	6.13808	6.5014	5.62807	7.44116	7.60229	7.18819	7.20099	5047	GD, GDA, GDF, GDS, PAEG, PEP, PP14
FAM131B	family with sequence similarity 131_ member B	-3.05474	-1.61105	3.45e-05	0.001266	4.0892	2	1.39547	3.45919	4.96981	3.67422	5.44541	4.15651	5.35765	0.775017	5.24304	4.38772	5.41356	2.01392	5.80934	2.54517	5.64617	3.21054	4.90464	3.32038	5.51807	1.1197	4.38415	0.730693	3.55644	1.52428	3.28761	1.24181	0	2.54923	2.57328	0.99088	9715	-
FLRT3	fibronectin leucine rich transmembrane protein 3	-3.05288	-1.61017	3.25e-05	0.001206	5.1786	2	3.91964	4.26142	4.05814	3.23331	6.08286	4.71425	6.92639	2.8877	7.29245	5.42898	6.41162	3.79855	6.41474	3.52101	6.53319	3.79121	6.58857	3.1054	7.09721	4.26167	1.68215	3.9549	3.18171	2.97824	1.97146	3.20002	2.52277	3.0496	1.16215	2.30731	23767	HH21
GPAT2	glycerol-3-phosphate acyltransferase 2_ mitochondrial	-3.05081	-1.60919	0.000395	0.008189	4.1398	2	5.42142	0	2.78067	0	0.875615	0	0.700477	3.5445	1.70374	0	0.915019	0	0	0	1.20715	0.939183	0.817153	2.85267	0	1.46442	2.10889	1.21342	3.76121	2.58588	7.24747	1.89914	7.19233	3.42041	6.91977	2.30731	150763	CT123
IFITM1	interferon induced transmembrane protein 1	-3.04263	-1.60532	1.68e-08	3e-06	8.446	1	8.6121	8.61076	7.46085	8.10757	9.63763	7.48052	8.64756	5.4949	9.20136	7.65684	10.0245	7.17575	9.97439	8.02108	9.67311	8.11929	9.63606	6.11805	9.40915	6.53131	7.69729	6.68023	7.55836	5.98977	8.60578	6.51995	8.46441	6.68535	8.30116	5.56705	8519	9-27, CD225, DSPA2A, IFI17, LEU13
RIMS3	regulating synaptic membrane exocytosis 3	-3.03661	-1.60246	0.000123	0.00335	7.1701	2	3.69586	6.75827	5.55444	5.86168	8.89986	6.4818	8.63173	3.35695	9.20688	7.33274	8.08271	6.91016	8.86448	5.88365	8.34107	5.73591	8.75572	3.74918	8.85484	2.35207	5.75535	1.86304	4.80285	3.37604	3.42477	4.00131	2.26227	4.51346	4.99763	2.984	9783	NIM3, RIM3
HMCN1	hemicentin 1	-3.01841	-1.59379	4.53e-06	0.000277	5.0207	2	2.26456	3.87124	5.25503	4.71219	5.89325	4.46216	6.71949	3.25316	6.76294	5.29975	6.42655	4.61768	6.03555	3.79681	5.88854	3.79121	6.49418	4.19275	6.45547	2.50895	4.72269	1.86304	4.09994	2.42716	2.77469	2.83639	3.73788	2.9013	4.19618	2.30731	83872	ARMD1, FBLN6, FIBL-6, FIBL6
NOS1	nitric oxide synthase 1 (neuronal)	-3.01392	-1.59164	2.47e-05	0.000974	5.7734	2	3.81209	4.04017	7.26364	2.94923	6.95087	4.75978	6.99869	3.25316	7.44353	4.38772	5.6354	4.26549	6.17784	3.95516	6.5734	3.47143	6.70904	6.70087	7.11236	1.74245	6.81452	3.61004	5.72877	1.80814	5.35506	4.67634	1.94415	5.82813	6.18583	0	4842	IHPS1, N-NOS, NC-NOS, NOS, BNOS, NNOS
OCSTAMP	osteoclast stimulatory transmembrane protein	-3.00501	-1.58737	0.000466	0.009314	-0.3844	2	0.626283	0	2.29704	0	2.11742	0	1.52363	0	2.00358	0	1.87057	0	1.89525	0	1.20715	0	0	0	0.784913	0	1.68215	0	0	0	0	0.750588	0	0	0	0	128506	C20ORF123, OC-STAMP, DJ257E24.3
LINC00911	long intergenic non-protein coding RNA 911	-2.99914	-1.58455	0.000413	0.008476	0.8765	2	0	0	2.29704	0	2.77474	0	2.248	2.18778	2.81144	0	2.65845	0.815325	2.13744	0	2.48048	0.939183	2.82688	0	2.76212	0.665856	0	0.730693	0	0	2.29147	0	0	0	0	0	100996280	-
FDPS	farnesyl diphosphate synthase	-2.99736	-1.58369	4.36e-07	4.11e-05	12.5608	1	11.5611	11.796	11.5552	11.4044	14.3318	11.6635	14.0056	11.1338	14.1779	11.4651	14.1617	11.895	14.0622	11.9492	14.0488	12.0156	13.1158	10.8343	13.1377	10.9362	10.4742	11.0952	11.2163	10.729	11.048	11.1019	10.5435	10.1841	11.1934	11.0417	2224	FPPS, FPS
LGI2	leucine-rich repeat LGI family_ member 2	-2.99084	-1.58055	0.00021	0.005061	1.6966	2	0.626283	0.932761	2.55903	0	3.66529	1.81763	2.248	0.775017	3.43059	1.30832	0.915019	0	2.96341	1.3853	1.56716	1.90778	4.15075	2.15621	2.90822	0	3.71697	0	0	0	0	1.24181	0.963007	0.85509	2.57328	0	55203	LGIL2
ACSS2	acyl-CoA synthetase short-chain family member 2	-2.96317	-1.56714	6.63e-06	0.000363	9.7602	1	7.81698	9.13159	7.61284	8.87638	11.2344	9.11587	11.8601	8.21711	11.3254	9.0427	11.1096	9.38701	11.3419	9.0138	11.36	8.68333	10.3136	7.67939	10.6858	7.75263	7.95018	7.50005	7.82126	7.7518	7.62735	7.85598	7.59075	7.7342	7.82995	7.74997	55902	ACAS2, ACECS, ACS, ACSA, DJ1161H23.1
CTSV	cathepsin V	-2.96198	-1.56656	2.97e-05	0.00113	13.0997	1	10.2132	12.9524	10.3076	10.7323	14.6793	12.2577	14.2054	11.1251	15.2322	13.0061	14.4548	12.5933	14.4605	12.186	14.0643	12.6091	14.7734	10.1165	14.5202	10.4492	11.7895	10.6362	10.6652	10.341	10.5039	10.0668	10.9674	10.8771	11.3322	11.0075	1515	CATL2, CTSL2, CTSU
ADAMTS15	ADAM metallopeptidase with thrombospondin type 1 motif_ 15	-2.95398	-1.56266	5.52e-05	0.001793	7.8366	1	4.92379	7.74549	6.13919	6.09241	8.3984	6.85134	8.95974	6.0994	9.87204	8.40253	8.54284	7.27107	9.31462	5.76034	9.14068	6.50636	9.83932	5.43231	9.8202	4.30512	6.74194	4.80925	5.62769	4.47679	5.69047	4.37795	5.17499	5.16114	5.05248	6.09049	170689	-
LINC01245	cancer susceptibility candidate 19 (non-protein coding)	-2.95011	-1.56077	3.06e-08	4.71e-06	3.6425	2	3.43089	2.21279	3.97079	0.880037	4.07562	3.10014	5.06618	3.62986	4.51235	2.62477	5.11489	1.33307	4.59208	0.852901	4.41187	1.50329	4.62174	3.21689	5.00398	3.67018	4.38415	3.44514	3.85363	1.52428	3.28761	2.96805	3.25464	3.30708	3.7419	2.56973	103021165	CARLO-6, LINC01245, CASC19
LTBP1	latent transforming growth factor beta binding protein 1	-2.93705	-1.55437	1.69e-07	1.88e-05	5.3286	2	5.07103	3.87124	6.46103	3.3568	6.06498	3.85466	5.37947	4.33647	6.47639	4.82353	4.58649	2.47461	5.54094	2.54517	5.10327	3.05997	6.19737	5.86773	6.81173	2.89755	6.94957	4.07266	6.7151	3.94354	5.42213	4.59719	4.09923	5.45517	5.62288	3.79037	4052	-
LINC00277	Ewing sarcoma associated transcript 1	-2.93272	-1.55224	0.000364	0.007701	0.2772	2	0.626283	0	0.984495	1.42269	0.875615	0	1.52363	0	2.25169	0	0.915019	0.815325	2.83181	0.852901	0.72631	0.939183	2.0171	1.25276	2.41628	0	1.68215	0	0.923789	0	0	0	0.963007	0	2.23686	0	283673	LINC00277, NCRNA00277, TMEM84, EWSAT1
SNX10	sorting nexin 10	-2.93124	-1.55151	2.11e-11	1.05e-08	5.3534	2	4.6391	3.19855	5.75076	3.76621	6.37172	3.76819	6.67605	4.65427	6.91462	4.38772	6.48477	4.70431	6.06515	4.40281	6.28946	4.87974	6.1671	4.44258	6.20988	5.13001	5.69511	3.9549	5.13297	4.00103	5.82047	4.63731	4.32102	4.40747	4.29046	3.88982	29887	OPTB8
IL1R2	interleukin 1 receptor_ type II	-2.92785	-1.54984	7.03e-06	0.000381	5.0752	2	4.15794	5.15134	4.29233	4.34552	7.04507	2.38082	5.85496	3.45377	7.18464	4.86067	5.80495	3.94806	6.2697	3.41597	5.44414	5.12703	6.95035	4.0793	5.58479	2.50895	4.9967	3.44514	4.09994	3.37604	3.42477	3.39981	1.53542	3.0496	4.68695	2.79168	7850	CD121B, CDW121B, IL-1R-2, IL-1RT-2, IL-1RT2, IL1R2C, IL1RB
KLK9	kallikrein-related peptidase 9	-2.91895	-1.54545	0.000124	0.003355	8.5585	1	5.57737	9.0399	7.01346	6.91097	11.0916	8.67075	10.1137	5.22001	10.0237	7.93008	9.61446	7.34709	10.2088	7.53608	9.41689	7.18939	9.8643	6.71043	9.49982	4.38828	6.74194	4.80925	6.58634	4.34978	6.07091	5.54616	5.01476	6.02017	6.53301	3.88982	284366	KLK-L3, KLKL3
TOX	thymocyte selection-associated high mobility group box	-2.91434	-1.54317	0.000621	0.011656	0.2385	2	0	0.932761	1.56425	0	2.11742	0.881014	2.248	0	0	0	0.915019	0	2.68699	0	0	1.50329	2.0171	0.758289	2.90822	0	1.68215	0	1.48243	0	0	0	0.963007	0	1.16215	0	9760	TOX1
PITX3	paired-like homeodomain 3	-2.91154	-1.54178	0.000116	0.003199	1.3273	2	2.26456	0	3.2939	0.880037	1.41661	0.881014	0.700477	1.64783	2.00358	0	1.4705	0	1.60402	0	0.72631	0.939183	0.817153	1.91301	1.66401	0	2.93115	1.21342	1.88412	0.700864	2.77469	1.24181	3.10349	0.85509	3.86957	1.57279	5309	ASMD, ASOD, CTPP4, CTRCT11, PTX3
SERPINA12	serpin peptidase inhibitor_ clade A (alpha-1 antiproteinase_ antitrypsin)_ member 12	-2.91083	-1.54143	0.000272	0.006132	3.8335	2	0.626283	3.04813	1.97668	1.42269	4.70286	2.12654	5.26688	0.775017	6.4141	2.44084	5.52874	4.52551	4.59208	3.41597	5.04726	3.97077	5.01073	1.25276	5.72942	1.1197	3.5904	1.21342	3.03152	0.700864	0.981038	1.24181	0	1.38832	1.16215	1.57279	145264	OL-64
PCSK9	proprotein convertase subtilisin/kexin type 9	-2.90829	-1.54017	0.000213	0.005097	8.8101	1	5.79073	8.44381	6.21716	9.22328	10.1331	8.29121	10.251	5.47196	10.5722	8.5405	9.87474	7.89956	10.4565	6.80012	10.6454	6.43166	10.1208	4.48774	10.8014	5.47254	6.11854	5.08627	6.44494	5.03999	5.13282	5.83196	4.92744	4.79144	4.68695	6.30386	255738	FH3, HCHOLA3, LDLCQ1, NARC-1, NARC1, PC9
CORO1A	coronin_ actin binding protein_ 1A	-2.90595	-1.53901	8.39e-08	1.09e-05	4.6555	2	4.54145	3.57375	4.21841	3.23331	5.80983	3.47249	6.39456	3.85927	6.2668	4.38772	5.07754	4.14676	6.19133	2.89705	5.87252	4.46605	4.82931	3.59261	5.78723	3.45558	3.71697	1.57449	4.60433	3.94354	3.13604	4.17488	4.17701	3.42041	4.54116	2.30731	11151	CLABP, CLIPINA, HCORO1, IMD8, TACO, P57
SLC38A3	solute carrier family 38_ member 3	-2.89965	-1.53588	0.000585	0.011087	4.6697	2	1.89449	4.26142	2.55903	1.81609	6.06498	2.12654	6.11123	0.775017	7.34013	1.68473	5.99723	4.93678	6.30735	3.0453	5.58847	4.40488	6.18231	3.67302	6.39478	0	1.0735	0	2.19798	0	0.981038	1.6076	0	0	3.07509	2.984	10991	G17, NAT1, SN1, SNAT3
CCAT1	colon cancer associated transcript 1 (non-protein coding)	-2.88486	-1.5285	1.68e-06	0.000127	6.1846	2	5.403	5.3573	4.87676	3.93425	7.2646	5.58897	7.90924	5.27404	7.72584	6.01102	7.28521	4.74575	7.45179	4.45676	7.60513	4.73814	7.55791	4.19275	7.5894	5.20073	4.9967	5.16792	4.17351	4.16091	4.71814	4.51345	4.38796	5.60654	4.61589	5.40839	100507056	CARLO-5, ONCO-LNCRNA-40
SERPINA3	serpin peptidase inhibitor_ clade A (alpha-1 antiproteinase_ antitrypsin)_ member 3	-2.87478	-1.52345	0.000106	0.002986	11.4943	1	8.73314	10.1174	9.67794	11.0445	11.8617	10.3699	10.8266	9.26224	12.5859	11.2458	12.7395	10.5903	12.1454	10.5565	12.51	11.6285	14.0686	9.06479	14.2691	9.03065	9.58203	9.00759	9.27193	8.61673	8.79163	8.48356	8.42908	8.03933	8.45667	9.24383	12	AACT, ACT, GIG24, GIG25
RTN2	reticulon 2	-2.87462	-1.52337	1.65e-09	4.65e-07	6.4529	2	6.19567	5.22331	7.29095	4.08475	7.97884	5.28077	6.90398	6.03826	7.89501	5.37867	7.12968	4.01738	7.19488	3.79681	6.66928	4.20409	7.09405	6.45015	7.6633	5.31142	6.98773	5.57954	6.11226	5.29109	5.71743	5.86612	5.31919	6.10738	7.2944	5.7634	6253	NSP2, NSPL1, NSPLI, SPG12
CDH22	cadherin 22_ type 2	-2.87448	-1.5233	0.000352	0.00749	4.2239	2	1.66645	3.57375	2.78067	4.22102	5.30014	3.57794	5.33549	0	5.82486	4.10784	5.66087	2.65944	6.29491	2.33074	5.88854	3.21054	5.61475	3.59261	5.8787	0	3.29811	0	3.94049	0	2.29147	1.24181	0	3.18408	2.57328	1.57279	64405	C20ORF25, DJ998H6.1
LINC00866	long intergenic non-protein coding RNA 866	-2.87312	-1.52262	0.000457	0.009162	-0.0256	2	1.06154	0.932761	1.56425	0.880037	1.41661	0.881014	2.42634	0	1.32479	0	1.87057	0	1.60402	0	1.20715	0	0.817153	1.25276	1.29041	0	0	0.730693	0.923789	0	2.29147	0	0	0	1.16215	0	100505561	-
SSPN	sarcospan	-2.86881	-1.52045	2.54e-06	0.000173	6.3399	2	4.67023	5.25799	6.5985	5.07795	7.1249	4.75978	6.93379	4.52654	8.01318	5.18732	8.27233	5.34	7.09795	6.08552	8.22597	6.26955	7.27528	5.99831	7.40477	5.08085	5.30956	4.01498	6.50317	5.38045	4.35598	4.75137	4.45194	4.16883	3.7419	4.07025	8082	DAGA5, KRAG, NSPN, SPN1, SPN2
ADRA2B	adrenoceptor alpha 2B	-2.86805	-1.52007	0.000333	0.007133	2.3874	2	1.06154	2.21279	1.56425	2.12489	3.22464	1.42403	3.53925	0	4.55915	0.797647	3.64532	2.01392	4.46459	2.07879	5.25931	2.70147	2.26592	1.25276	2.76212	0	1.68215	0.730693	1.48243	0.700864	0	1.24181	0	1.77678	1.16215	0	151	ADRA2L1, ADRA2RL1, ADRARL1, ALPHA2BAR, FAME2, ALPHA-2BAR
ATP8B2	ATPase_ aminophospholipid transporter_ class I_ type 8B_ member 2	-2.867	-1.51954	2.53e-05	0.000996	4.7055	2	3.10604	3.95818	4.96981	4.40396	5.52603	4.406	6.25984	1.27645	6.81208	4.89687	5.60946	2.82325	5.73761	2.07879	5.42229	2.70147	6.58857	4.29793	5.74895	2.17602	4.66104	2.79388	3.31772	2.42716	3.87129	3.6556	1.53542	4.35141	3.07509	1.9863	57198	ATPID
LOXL1-AS1	LOXL1 antisense RNA 1	-2.86392	-1.51799	0.000155	0.004069	1.6133	2	1.66645	0	3.14225	0	2.77474	0.881014	2.04447	0.775017	3.78578	0	2.84783	2.01392	2.526	0.852901	3.4351	0.939183	2.0171	2.7075	2.20631	0	1.68215	0.730693	3.03152	0	1.55962	0	0	2.33467	2.23686	0.99088	100287616	-
DPYSL2	dihydropyrimidinase-like 2	-2.85999	-1.51601	5.04e-05	0.001689	6.5257	2	5.07103	5.95182	5.21758	5.81936	7.83329	5.53761	8.3405	4.77161	8.10278	6.61047	7.25206	6.47775	7.80753	5.60174	8.16148	5.85503	7.75397	5.15276	8.04925	2.35207	5.69511	2.64973	5.16939	1.80814	5.05042	4.00131	3.83705	4.7046	4.88126	3.30547	1808	CRMP-2, CRMP2, DHPRP2, DRP-2, DRP2, N2A3, ULIP-2, ULIP2
RNASE1	ribonuclease_ RNase A family_ 1 (pancreatic)	-2.84887	-1.51039	0.000102	0.002906	2.1068	2	2.26456	0.932761	1.56425	0.880037	4.8769	0	2.728	1.64783	2.64786	1.30832	1.87057	0	4.11429	0	1.85504	1.90778	2.663	0.758289	3.16235	1.1197	2.10889	2.10339	2.86387	1.17054	0.981038	0.750588	2.93463	3.42041	2.84589	0.99088	6035	RAC1, RIB1, RNS1
KLK5	kallikrein-related peptidase 5	-2.83064	-1.50113	2.32e-05	0.000933	12.9274	1	10.9242	12.5795	11.1989	11.6384	14.9077	12.6486	13.9804	10.7422	14.5428	12.3512	14.3512	12.2454	14.4521	12.5807	14.1671	12.6013	14.3439	10.4425	13.8935	10.7673	10.9967	10.6629	10.9714	10.5978	10.8026	10.5159	10.8894	10.4093	11.2488	10.7931	25818	KLK-L2, KLKL2, SCTE
LIFR	leukemia inhibitory factor receptor alpha	-2.82694	-1.49924	6.57e-06	0.000361	2.1117	2	1.89449	2.69009	2.97276	1.81609	2.77474	2.12654	3.45952	1.27645	3.78578	2.22999	1.87057	0.815325	2.83181	0	2.64044	0.939183	3.44692	1.25276	2.76212	1.46442	3.83333	1.86304	3.44201	1.52428	1.55962	0.750588	0	0.85509	3.07509	1.57279	3977	CD118, LIF-R, SJS2, STWS, SWS
TET1	tet methylcytosine dioxygenase 1	-2.82461	-1.49805	7.99e-06	0.000415	3.8652	2	3.43089	2.47109	5.21758	1.81609	4.14534	1.81763	5.5813	3.14132	5.0599	3.18918	4.87475	2.82325	4.27493	1.77332	5.07554	1.50329	4.57639	4.97385	4.59309	1.46442	4.13487	0.730693	3.85363	1.80814	4.1339	2.83639	1.53542	3.95974	4.61589	2.79168	80312	CXXC6, LCX, MLL-TET1, TET1-MLL, BA119F7.1
SNCA	synuclein_ alpha (non A4 component of amyloid precursor)	-2.82134	-1.49638	0.000449	0.009062	5.8081	2	3.91964	5.64622	4.61394	5.18181	7.44821	5.42906	7.06753	3.02008	7.67363	5.75902	7.6835	4.93678	7.57008	4.86861	7.38559	4.92401	7.10208	2.85267	6.62357	2.17602	2.93115	1.21342	4.84849	2.04523	0	0.750588	1.94415	0.85509	3.27282	2.30731	6622	NACP, PARK1, PARK4, PD1
ACLY	ATP citrate lyase	-2.80692	-1.48899	6.85e-08	9.29e-06	11.0152	1	10.3972	9.91086	9.75513	9.94664	11.9182	10.0723	13.1435	10.0824	12.4096	10.3593	12.2967	10.2539	12.2858	9.67669	12.3859	9.55004	11.4284	9.58339	11.796	9.62223	10.3269	9.44167	9.5833	9.64563	9.8837	10.1454	9.89378	10.1941	9.92409	10.4226	47	ACL, ATPCL, CLATP
MICA	MHC class I polypeptide-related sequence A	-2.79566	-1.48319	3.77e-05	0.001354	7.1395	2	4.75979	6.65795	5.66987	6.59706	8.51163	6.73076	8.32371	5.10546	8.85494	6.58851	8.69856	6.74628	8.73463	6.6805	8.63743	6.89905	8.3196	5.09555	8.29487	4.57736	4.38415	4.4224	6.1492	4.16091	5.76987	4.59719	5.48126	4.46144	4.99763	4.88921	100507436	MIC-A, PERB11.1
CYS1	cystin 1	-2.79328	-1.48196	5.9e-05	0.001882	3.3958	2	1.89449	0.932761	4.7773	0.880037	5.06853	1.81763	3.68659	0.775017	4.9933	3.5028	4.08242	2.47461	4.27493	1.77332	4.53914	1.90778	4.15075	4.0793	3.37835	0.665856	3.71697	2.30936	3.76121	1.17054	3.13604	1.89914	1.94415	4.23229	4.75467	0	192668	-
GALNT6	polypeptide N-acetylgalactosaminyltransferase 6	-2.78443	-1.47738	1.13e-07	1.4e-05	8.3853	1	7.38191	7.41759	7.72386	6.91097	9.3873	6.50872	9.04586	7.6242	10.0708	7.64624	9.57982	8.21199	9.37052	7.12571	9.72311	7.51297	9.54776	7.07099	10.1789	7.28933	7.93723	7.32718	6.88897	7.3264	7.3371	7.4738	7.35175	6.77332	6.67959	7.13158	11226	GALNAC-T6, GALNACT6
HAS2	hyaluronan synthase 2	-2.77918	-1.47466	1.44e-05	0.000651	4.9912	2	3.56945	4.77394	5.21758	4.15449	6.48362	4.61863	6.29472	3.02008	5.86266	4.86067	5.25531	3.33861	6.28236	4.74395	6.05399	4.58111	6.90521	4.01905	6.6341	1.46442	4.30575	3.75801	4.80285	2.85893	3.13604	2.96805	2.52277	3.62342	3.7419	1.9863	3037	-
RASSF8-AS1	RASSF8 atnisense RNA 1	-2.77597	-1.47299	0.001181	0.019188	-0.1981	2	0	0	0.984495	0.880037	1.80916	0	2.04447	0	0.809399	0	2.84783	0	1.23874	0	0.72631	0	0	0	2.41628	0.665856	1.68215	0	1.48243	0	0	0	0	0.85509	0	0	100506451	-
FAM26E	family with sequence similarity 26_ member E	-2.76669	-1.46816	0.000253	0.005794	7.943	1	4.40003	7.07266	5.77674	5.30959	8.27553	6.02163	8.83496	6.88691	9.70129	7.97734	9.6999	7.81449	9.09901	6.69179	9.50138	7.80104	10.1443	5.15276	9.7721	5.45336	5.09322	6.00688	4.84849	4.73577	4.35598	5.04773	5.31919	4.91262	3.98685	6.53649	254228	C6ORF188, DJ493F7.3
LONRF3	LON peptidase N-terminal domain and ring finger 3	-2.75733	-1.46327	0.000726	0.013187	0.2872	2	1.66645	1.4946	1.97668	0	0.875615	0	2.85806	0.775017	1.32479	0	0	0	0.74843	0	1.56716	0.939183	1.71623	1.25276	1.66401	0.665856	2.43779	0	1.88412	0	0	0	0	0.85509	1.79735	0	79836	RNF127
LOC100132781	cyclin Y-like 1 pseudogene	-2.75013	-1.4595	0.001227	0.019786	6.2347	2	1.89449	6.11206	2.97276	3.57598	8.17077	5.42906	7.36423	0	8.84789	5.27245	7.76799	5.10545	7.92117	5.6255	6.71493	5.73591	8.02267	1.25276	7.68374	1.74245	2.43779	0.730693	0.923789	0.700864	1.55962	1.24181	1.94415	0	1.79735	0.99088	100132781	-
KCNK7	potassium channel_ two pore domain subfamily K_ member 7	-2.74912	-1.45897	1.82e-05	0.000781	7.5983	1	5.64162	7.2468	6.61299	6.68217	9.62396	6.5611	8.28376	6.37137	9.058	6.41214	9.57145	6.70485	9.07192	7.06621	9.18839	6.81926	8.11279	5.66638	8.35981	6.1926	5.34919	6.91119	5.40143	6.04548	5.66301	5.94815	5.05652	5.65367	6.00299	5.70997	10089	K2P7.1, TWIK3
DOCK10	dedicator of cytokinesis 10	-2.74358	-1.45606	0.000207	0.004992	2.4612	2	1.89449	2.47109	4.61394	1.42269	2.37127	2.12654	3.28549	1.94292	2.25169	1.68473	2.18345	0	3.29859	0	1.85504	0.939183	3.54436	2.98456	2.59954	0.665856	4.78182	1.21342	3.31772	0	3.28761	1.6076	0	3.0496	3.86957	0	55619	DRIP2, NBLA10300, ZIZ3
TDH	L-threonine dehydrogenase (pseudogene)	-2.74001	-1.45418	0.000736	0.013299	0.6488	2	0.626283	0.932761	2.55903	0	2.11742	0	2.04447	0	2.64786	0.797647	1.87057	0	0.74843	0	0.72631	1.50329	1.33563	0	1.29041	0	2.10889	0	2.45561	0	1.55962	0.750588	0	2.33467	2.57328	0	157739	SDR14E1P
RASD2	RASD family_ member 2	-2.73879	-1.45354	0.000277	0.006248	2.4388	2	2.09136	3.33475	2.97276	0.880037	3.92519	0	4.10862	0	3.93519	1.98297	3.53942	3.22599	3.57039	0.852901	4.06226	0.939183	3.72146	1.91301	3.56618	0	2.10889	0.730693	3.31772	1.17054	0.981038	0.750588	0.963007	2.33467	0	0.99088	23551	MGC:4834, RHES, TEM2
ENTPD2	ectonucleoside triphosphate diphosphohydrolase 2	-2.73807	-1.45316	7.36e-10	2.4e-07	6.9064	2	7.20718	5.4502	6.29114	3.93425	7.38477	4.51623	7.76745	6.68233	8.32555	5.69878	7.60035	5.22748	7.87595	4.40281	7.97894	5.12703	6.95921	5.77967	7.93029	6.24932	6.97512	6.61378	6.78719	6.22509	7.24747	6.42	7.45684	6.65093	7.32813	6.68232	954	CD39L1, NTPDASE-2
KRT42P	keratin 42 pseudogene	-2.73754	-1.45288	8.51e-05	0.002533	6.3382	2	4.06729	6.55014	4.82789	5.33984	8.56348	5.79982	7.13324	4.48132	7.73606	5.71914	8.20898	4.97213	8.08547	5.64886	7.22448	5.96506	7.5403	3.89041	7.00277	4.38828	4.22284	4.28275	3.18171	3.61572	4.87	3.0887	3.39145	4.7046	5.15629	5.11151	284116	-
NXPH3	neurexophilin 3	-2.73174	-1.44982	5.22e-05	0.001735	4.215	2	1.89449	2.69009	2.29704	2.3791	5.95279	2.95109	5.17002	4.57038	6.32212	1.68473	5.22146	3.54049	5.38535	2.89705	5.35468	2.22335	5.01073	2.15621	6.07713	3.53072	4.13487	3.68592	2.86387	2.97824	2.29147	2.96805	2.74334	3.18408	2.23686	3.98285	11248	NPH3
AK7	adenylate kinase 7	-2.731	-1.44943	4.81e-05	0.001634	3.3656	2	2.41918	0	5.17913	2.3791	3.56709	0	4.76828	1.64783	4.95881	1.30832	4.68911	3.87524	4.16985	3.0453	4.22256	3.05997	3.34243	2.98456	3.65166	2.17602	4.22284	2.79388	3.85363	1.17054	0	2.6915	2.52277	3.30708	4.19618	0.99088	122481	AK 7
TMEM121	transmembrane protein 121	-2.72321	-1.44531	0.000115	0.003193	3.1119	2	1.66645	2.88019	3.67168	1.42269	3.92519	2.95109	2.728	0.775017	4.00447	3.90949	4.95931	0	5.4541	0.852901	4.32032	2.22335	4.02135	2.15621	4.01638	1.74245	0	2.64973	4.09994	2.58588	3.13604	1.89914	2.93463	1.38832	1.16215	1.57279	80757	HOLE
MT2A	metallothionein 2A	-2.7194	-1.44329	1.27e-07	1.53e-05	8.7652	1	9.24449	6.89676	9.90843	6.39578	9.22571	6.5611	7.20222	8.99097	8.92808	7.57542	8.85574	6.00123	9.04803	6.26259	8.62553	6.49172	8.45419	7.8534	8.76658	7.98747	10.4089	7.6963	9.25508	7.99049	10.0387	7.94657	9.84845	8.95663	9.84668	8.3437	4502	MT2
TBX2	T-box 2	-2.71652	-1.44176	0.000554	0.010641	3.6583	2	1.06154	1.89793	2.29704	3.67422	5.23767	2.59694	4.7348	0.775017	5.40553	3.83681	5.1513	3.33861	4.8855	0.852901	5.46567	4.20409	5.17187	2.98456	5.21527	1.1197	2.10889	1.21342	2.67413	0	2.55322	0.750588	0	0.85509	2.84589	0.99088	6909	-
RTN4R	reticulon 4 receptor	-2.70693	-1.43666	0.000108	0.003031	6.2416	2	4.3624	5.81876	4.92404	6.11008	7.95477	5.86378	7.15238	4.88012	8.02573	6.33508	7.34929	5.36681	7.81191	5.80263	7.55581	5.37042	7.37135	1.62033	7.81459	3.29243	3.941	3.82667	4.60433	3.46043	5.09221	3.87279	3.92984	3.52548	4.75467	4.2306	65078	NGR, NOGOR
EMX1	empty spiracles homeobox 1	-2.70139	-1.4337	0.001161	0.018946	1.4381	2	0	0	0.984495	0.880037	3.92519	0	1.80742	0.775017	3.61909	0	0.915019	0.815325	1.23874	0	1.56716	2.22335	3.22977	1.91301	4.13986	0.665856	0	1.21342	1.88412	0	0.981038	0	0	1.38832	2.84589	0.99088	2016	-
PRPH	peripherin	-2.70049	-1.43322	0.00131	0.020807	0.588	2	0	0.932761	2.55903	0	1.80916	0	2.42634	0	2.25169	0	1.87057	0.815325	2.34477	0	2.64044	0.939183	1.33563	2.36426	2.20631	0	1.0735	0	0.923789	0	0	0	0	0	2.23686	0	5630	NEF4, PRPH1
CAPN6	calpain 6	-2.69933	-1.4326	0.001535	0.023707	2.863	2	0	0	0	2.12489	3.46172	0	5.09285	0	5.68415	1.98297	4.63871	2.47461	4.16985	2.33074	4.989	1.90778	4.52956	0	3.47532	0	0	0	0	0	0	0.750588	0	0	1.79735	0	827	CANPX, CAPNX, CALPM, DJ914P14.1
OLFM2	olfactomedin 2	-2.69922	-1.43254	7.99e-06	0.000415	3.7858	2	4.01973	0	4.49375	2.12489	3.34805	1.42403	2.85806	2.74194	4.73251	2.9344	4.58649	1.71329	4.50835	1.3853	4.57919	2.70147	4.15075	2.54606	4.13986	1.97546	5.53249	3.04506	5.62769	3.75591	4.1339	2.83639	2.93463	4.74867	4.37896	3.68356	93145	NOE2, NOELIN2, NOELIN2_V1, OLFC
ACY3	aminoacylase 3	-2.68699	-1.42599	5.02e-06	0.0003	1.9249	2	2.09136	1.89793	3.14225	2.12489	3.34805	0.881014	2.42634	2.18778	2.00358	1.98297	2.44041	0.815325	1.60402	0	3.14614	2.48213	2.663	1.62033	3.16235	1.74245	2.93115	1.57449	2.67413	0.700864	3.55001	1.24181	2.26227	0	2.57328	0	91703	ACY-3, HCBP1
SLC26A4	solute carrier family 26 (anion exchanger)_ member 4	-2.68697	-1.42598	0.000858	0.015042	2.0737	2	1.89449	0	4.36264	0.880037	1.41661	0	0.700477	0.775017	0	0.797647	1.87057	1.71329	1.23874	0.852901	1.85504	0	2.97404	2.85267	1.29041	1.74245	3.71697	1.57449	4.80285	1.52428	3.66524	1.24181	0	2.08253	3.86957	0	5172	DFNB4, EVA, PDS, TDH2B
LINGO1	leucine rich repeat and Ig domain containing 1	-2.68676	-1.42587	0.000832	0.014677	1.7234	2	1.06154	1.4946	2.78067	0.880037	2.58706	0.881014	2.04447	1.27645	4.25244	0.797647	2.44041	0	2.13744	0.852901	1.20715	0	3.80248	2.54606	4.01638	0	1.0735	0	0.923789	2.04523	0	1.89914	0	0.85509	3.27282	0	84894	LERN1, LRRN6A, UNQ201
LINC00087	small integral membrane protein 10 like 2B	-2.68578	-1.42534	5.62e-05	0.001816	3.0888	2	3.19436	2.69009	2.55903	2.3791	5.10399	2.59694	5.37947	1.64783	4.64843	2.44084	3.74398	3.54049	4.32474	2.89705	4.00461	1.90778	3.22977	2.7075	3.73236	1.46442	2.70546	1.86304	1.88412	0.700864	0.981038	0.750588	2.26227	2.73598	2.57328	0.99088	644596	LINC00087, NCRNA00087, SMIM10L2B
SLC22A3	solute carrier family 22 (organic cation transporter)_ member 3	-2.68369	-1.42422	0.000307	0.006719	7.185	2	4.50737	6.47842	3.87781	5.66064	8.21197	6.77578	8.62032	6.22816	9.14686	7.11952	8.47623	7.12168	8.39909	6.39285	8.21011	6.67127	8.85639	3.21689	9.10642	4.26167	5.59976	2.48956	5.30651	3.75591	4.1339	4.27999	5.21241	5.28603	4.37896	5.26758	6581	EMT, EMTH, OCT3
EGFEM1P	EGF-like and EMI domain containing 1_ pseudogene	-2.67855	-1.42145	0.001733	0.025646	0.814	2	1.06154	0.932761	4.36264	0.880037	0	0	0	0.775017	0	0	0.915019	0	0	0	0.72631	0	0.817153	1.25276	1.29041	0	2.10889	0.730693	3.03152	0	1.55962	0.750588	0	0.85509	3.44668	0	93556	C3ORF50, NCRNA00259
SDC3	syndecan 3	-2.67584	-1.41999	4.77e-06	0.00029	5.8155	2	4.54145	5.56545	3.97079	4.96602	7.07218	5.98376	7.38596	3.45377	7.13144	5.85415	6.44133	5.04033	7.11221	3.30267	7.18609	4.7869	6.85861	4.2463	7.37366	4.12286	5.09322	4.33082	4.80285	4.92588	4.48707	4.37795	5.01476	4.40747	5.42924	3.98285	9672	SDCN, SYND3
DSC1	desmocollin 1	-2.67513	-1.41961	0.001611	0.024439	6.6847	2	1.39547	6.50753	3.87781	3.67422	7.68901	5.45697	8.42426	1.27645	9.51651	6.49713	7.53985	6.10041	8.08186	5.88365	7.06441	6.16275	8.46667	1.25276	8.60988	2.17602	2.10889	1.21342	1.48243	0	2.29147	1.6076	2.26227	2.08253	1.16215	2.30731	1823	CDHF1, DG2/DG3
ZSCAN5A	zinc finger and SCAN domain containing 5A	-2.6743	-1.41916	1.23e-05	0.00058	4.7095	2	3.19436	4.11775	4.05814	4.15449	6.49701	2.95109	5.46362	2.39705	6.70169	4.38772	5.66087	4.74575	6.02051	3.71061	5.42229	4.27417	5.78389	3.21689	6.18142	3.53072	3.71697	2.64973	3.85363	2.58588	3.42477	3.73168	2.52277	4.29308	4.09531	3.15367	79149	ZNF495, ZSCAN5
DIRC3	disrupted in renal carcinoma 3	-2.67037	-1.41704	0.001336	0.021172	4.1888	2	0.626283	4.51186	2.29704	1.81609	6.38619	3.10014	4.47583	0	6.7224	3.90949	5.0392	3.71755	6.00532	3.41597	4.41187	3.88378	5.95313	1.91301	5.70963	0.665856	2.70546	1.21342	2.19798	0	2.29147	2.53041	0	0	1.79735	0	729582	-
TUBA3FP	tubulin_ alpha 3f_ pseudogene	-2.66348	-1.41331	0.000353	0.007501	1.0613	2	1.06154	1.4946	0.984495	0	2.37127	0.881014	2.04447	0.775017	2.00358	0.797647	2.44041	0.815325	0.74843	0.852901	2.78442	1.50329	0.817153	1.25276	3.04087	0	2.10889	0.730693	1.88412	0.700864	3.55001	0.750588	0	1.77678	1.16215	0	113691	-
CELF4	CUGBP_ Elav-like family member 4	-2.6608	-1.41186	0.000133	0.003547	3.0052	2	1.66645	1.4946	2.97276	1.81609	4.557	1.42403	4.00009	1.94292	4.85009	0	4.47601	2.82325	4.05651	0	4.86489	2.89183	3.80248	3.67302	3.37835	2.17602	2.43779	0	2.19798	1.80814	2.55322	2.14156	3.39145	3.42041	1.79735	1.57279	56853	BRUNOL-4, BRUNOL4
SMIM24	small integral membrane protein 24	-2.6511	-1.40659	5.94e-08	8.19e-06	4.092	2	3.81209	3.95818	4.87676	2.94923	5.17238	2.78486	3.28549	2.8877	5.29926	4.10784	5.28838	2.97035	4.91831	2.54517	4.1177	3.88378	5.04443	4.2463	5.80599	3.00686	4.30575	2.79388	4.37407	3.28639	3.77194	1.89914	3.39145	3.18408	4.75467	2.56973	284422	C19ORF77, HSPC323
EMP3	epithelial membrane protein 3	-2.64884	-1.40536	2.46e-06	0.000169	4.593	2	4.54145	4.39207	4.49375	3.67422	6.44267	3.85466	3.37513	4.77161	5.32657	3.76027	4.99981	1.33307	6.07973	3.0453	4.61815	3.34687	5.89889	4.44258	5.99774	1.1197	5.46194	2.92493	4.2435	3.37604	4.35598	3.6556	4.25081	4.40747	4.68695	3.15367	2014	YMP
DUSP9	dual specificity phosphatase 9	-2.64345	-1.40242	0.000213	0.005097	3.0285	2	2.09136	3.04813	1.97668	2.78303	5.20539	3.23522	3.94261	2.39705	5.15438	3.30147	3.0152	0	4.46459	0.852901	4.45555	1.90778	3.34243	1.25276	4.40896	0.665856	0	2.10339	3.18171	2.2488	1.55962	1.24181	2.93463	2.08253	2.23686	1.9863	1852	MKP-4, MKP4
C1QL1	complement component 1_ q subcomponent-like 1	-2.63684	-1.39881	0.000645	0.012006	2.7204	2	0	1.89793	2.29704	2.78303	3.92519	1.81763	3.28549	0	4.81195	3.0674	3.42513	1.33307	4.78233	2.54517	3.67573	1.90778	4.2695	1.62033	4.86773	0	1.68215	1.86304	0.923789	1.17054	1.55962	0	0.963007	2.08253	1.79735	2.30731	10882	C1QRF, C1QTNF14, CRF
TTLL10	tubulin tyrosine ligase-like family member 10	-2.63583	-1.39826	0.000943	0.016146	3.0266	2	2.26456	0	4.61394	0.880037	1.41661	2.95109	0.700477	0	2.81144	2.9344	0.915019	1.33307	3.19528	0	3.24903	1.50329	4.82931	2.98456	6.0459	0.665856	4.52923	1.57449	2.67413	0	3.42477	2.34905	1.53542	3.0496	3.7419	3.30547	254173	TTLL5
AJAP1	adherens junctions associated protein 1	-2.62979	-1.39495	0.001553	0.023932	1.5517	2	0.626283	2.69009	1.56425	0	4.45087	2.12654	3.28549	0	2.25169	0	1.87057	0	3.29859	0	2.48048	0	2.47808	1.25276	3.04087	0	1.68215	0	0	0	1.97146	1.24181	0	0.85509	2.23686	1.9863	55966	MOT8, SHREW-1, SHREW1
PROC	protein C (inactivator of coagulation factors Va and VIIIa)	-2.62402	-1.39178	0.000696	0.012766	5.1345	2	1.39547	4.77394	4.36264	5.50914	6.67256	4.15651	4.98309	3.14132	7.24314	5.54758	6.38129	4.47712	6.95505	3.79681	6.90811	3.97077	6.44456	1.91301	6.60225	2.35207	3.29811	1.21342	1.88412	2.97824	3.13604	2.14156	1.53542	2.73598	2.84589	1.57279	5624	APC, PC, PROC1, THPH3, THPH4
AQP9	aquaporin 9	-2.61697	-1.3879	0.002241	0.031205	0.8982	2	0.626283	0	0.984495	0	2.58706	0.881014	4.55468	0	3.43059	0.797647	0	2.01392	1.89525	0	1.20715	0.939183	1.71623	0	2.20631	0	0	0.730693	0	0	0.981038	0	0	0	0	0	366	AQP-9, HST17287, SSC1
TREM2	triggering receptor expressed on myeloid cells 2	-2.61326	-1.38585	0.000431	0.00876	5.0813	2	2.68613	5.50898	3.87781	5.14801	7.08996	3.93625	5.5813	1.27645	6.50057	5.06538	6.84852	3.22599	6.29491	4.34675	6.66928	4.73814	6.36678	4.34777	6.10771	2.50895	3.71697	0.730693	4.65658	2.04523	3.87129	2.53041	2.52277	2.9013	3.07509	0.99088	54209	TREM-2, TREM2A, TREM2B, TREM2C
ROPN1	rhophilin associated tail protein 1	-2.61302	-1.38572	0.002268	0.031458	5.3453	2	1.66645	2.88019	1.56425	0	6.67256	2.38082	6.03076	1.94292	7.12367	4.0447	8.11072	5.28484	6.92307	4.74395	7.31026	5.83198	6.74022	0	6.56968	0.665856	1.68215	1.86304	0.923789	0.700864	0	0.750588	0.963007	0	0	0.99088	54763	CT91, ODF6, RHPNAP1, ROPN1A, ROPPORIN
SLC36A2	solute carrier family 36 (proton/amino acid symporter)_ member 2	-2.61221	-1.38527	0.002102	0.029664	1.5657	2	1.89449	0	3.77843	0	0.875615	0	0	0.775017	0.809399	0	0	0	1.23874	0.852901	0.72631	0	1.71623	3.21689	2.76212	0	4.52923	0.730693	3.55644	0.700864	1.97146	0.750588	0.963007	0.85509	3.7419	0	153201	PAT2, TRAMD1
GPR55	G protein-coupled receptor 55	-2.61129	-1.38476	0.001573	0.024071	0.7551	2	1.66645	0	3.55641	0	1.80916	0	1.16998	0	0	0	2.18345	0	1.23874	0	1.20715	0	1.33563	2.15621	0	0.665856	2.70546	0.730693	1.88412	0	1.55962	1.89914	1.94415	0.85509	2.57328	0	9290	LPIR1
TACR1	tachykinin receptor 1	-2.60902	-1.38351	0.002075	0.029389	0.089	2	0	0	2.55903	0	2.37127	1.42403	0.700477	0	0.809399	0.797647	0	0	1.89525	0	1.56716	0.939183	2.26592	1.25276	1.66401	0	2.10889	0	1.48243	0	0.981038	0	0	0	0	0	6869	NK1R, NKIR, SPR, TAC1R
SPTBN5	spectrin_ beta_ non-erythrocytic 5	-2.60808	-1.38299	0.000164	0.004218	8.4302	1	5.74759	8.56302	5.52408	6.4243	8.82482	8.34448	9.07958	7.17657	9.81894	8.53477	8.56998	6.95502	9.09363	5.33986	9.06161	6.52084	10.4652	5.91809	11.1975	6.5129	7.91099	6.44933	6.11226	6.52857	6.78234	6.22318	8.03384	8.03933	6.30356	7.38269	51332	BSPECV, HUBSPECV, HUSPECV
CD6	CD6 molecule	-2.60684	-1.3823	2.89e-05	0.001105	5.4269	2	4.73055	2.47109	5.39582	1.42269	5.76624	0.881014	5.80745	4.23114	7.22148	3.83681	6.59461	5.07326	6.28236	2.89705	7.37993	4.87974	5.14105	5.40902	6.85742	4.61237	4.83861	4.54972	6.05501	5.22024	5.00739	5.34283	4.32102	4.29308	4.61589	4.73727	923	TP120
C14orf23	long intergenic non-protein coding RNA 1551	-2.60682	-1.38229	0.001991	0.028438	0.6314	2	1.66645	0.932761	3.55641	0.880037	1.41661	0.881014	0	0	0	0	0	0.815325	0.74843	0	0	0	1.33563	0.758289	1.66401	0	3.12626	0.730693	2.67413	0	0.981038	0	2.26227	1.77678	1.79735	0	387978	C14ORF23, C14_5148, LINC01551
MYRF	myelin regulatory factor	-2.60572	-1.38168	1.95e-05	0.000819	5.6268	2	3.86686	4.56822	5.09901	4.56629	6.79691	4.66723	6.96299	4.17545	7.11587	4.62202	4.87475	3.63174	6.67687	2.89705	5.15718	3.97077	7.01127	6.05942	7.95572	4.71259	4.59664	3.25892	5.97497	5.40196	5.17232	5.18939	4.62844	4.95085	4.19618	3.88982	745	C11ORF9, MRF, NDT80, PQN-47
FIBCD1	fibrinogen C domain containing 1	-2.60176	-1.37949	0.00073	0.0132	3.1781	2	2.09136	1.89793	4.1405	0.880037	4.8769	2.78486	3.08755	2.39705	5.45587	2.62477	4.41742	1.33307	5.01249	2.07879	4.41187	2.89183	4.66571	4.34777	3.37835	0.665856	1.68215	1.57449	1.88412	0	1.55962	1.24181	0	2.08253	2.23686	0	84929	-
LINC00898	long intergenic non-protein coding RNA 898	-2.60027	-1.37866	0.000284	0.006329	1.9268	2	0	0.932761	2.29704	1.42269	3.22464	1.81763	3.68659	1.27645	3.32622	1.98297	2.18345	2.01392	2.96341	0	2.91533	0.939183	3.10756	2.7075	3.80877	1.1197	2.93115	0	1.88412	0	2.77469	1.24181	0	2.08253	1.79735	0.99088	400932	-
OSBPL6	oxysterol binding protein-like 6	-2.59791	-1.37735	0.00046	0.009226	4.9743	2	2.09136	4.99564	4.72488	2.78303	6.58746	5.42906	6.76165	2.18778	6.349	5.03322	5.95666	5.00663	6.02051	4.28843	6.21516	4.40488	6.39317	2.15621	6.45547	0.665856	3.5904	2.10339	3.66245	1.80814	3.55001	1.89914	3.39145	3.30708	3.86957	0.99088	114880	ORP6
LY6G6E	lymphocyte antigen 6 complex_ locus G6E (pseudogene)	-2.59413	-1.37525	0.002248	0.031266	0.7384	2	0.626283	0	2.97276	0	0	0	0.700477	0	2.25169	1.30832	2.84783	0	3.084	0	1.20715	0.939183	1.33563	2.36426	0	0	2.10889	0	1.88412	0.700864	2.55322	0	0	0	2.23686	0	79136	C6ORF22, G6E
SCG5	secretogranin V	-2.59262	-1.37441	0.000262	0.005949	1.7944	2	3.75514	0	3.43112	0.880037	2.94079	1.42403	1.80742	1.27645	1.32479	1.30832	2.44041	0.815325	1.23874	0	2.30054	0	1.33563	1.25276	1.66401	1.46442	1.0735	1.86304	1.48243	0.700864	4.1339	1.89914	3.25464	2.08253	2.84589	2.56973	6447	7B2, P7B2, SGNE1, SGV
NR2F1-AS1	NR2F1 antisense RNA 1	-2.58454	-1.36991	0.000578	0.011012	5.9347	2	2.68613	5.07559	4.29233	5.27869	7.27241	5.4006	7.63763	2.18778	7.54001	5.42898	7.62645	5.04033	7.16784	5.55303	7.46254	6.53518	7.25383	4.44258	7.16419	3.45558	4.13487	1.57449	4.89273	3.08844	1.97146	2.6915	3.10349	3.30708	3.60183	4.15265	441094	-
KCNIP3	Kv channel interacting protein 3_ calsenilin	-2.58435	-1.3698	0.000162	0.004197	3.4724	2	3.10604	3.45919	5.29154	2.3791	4.50491	2.38082	4.00009	0	4.3083	2.62477	3.64532	2.26258	3.99632	0.852901	4.22256	0.939183	3.72146	4.19275	4.97111	1.74245	4.38415	2.10339	3.76121	0	3.66524	2.96805	0.963007	4.23229	4.54116	0.99088	30818	CSEN, DREAM, KCHIP3
DNAJC22	DnaJ (Hsp40) homolog_ subfamily C_ member 22	-2.58154	-1.36823	1.95e-06	0.000142	3.0547	2	2.91131	3.57375	4.29233	1.81609	2.58706	0.881014	3.28549	1.94292	4.41393	2.78787	2.84783	0.815325	3.99632	0.852901	3.24903	2.70147	4.15075	2.98456	4.63567	3.10846	4.22284	2.48956	4.02242	2.42716	3.13604	1.6076	2.74334	2.54923	3.44668	1.9863	79962	WUS
SCNN1D	sodium channel_ non voltage gated 1 delta subunit	-2.58084	-1.36784	0.000405	0.008362	8.4566	1	6.17411	8.94996	6.50832	7.78915	9.9504	8.50015	7.78391	6.70218	9.49561	8.65854	8.66117	6.44038	9.51428	6.84127	8.56449	7.70915	10.95	5.18053	10.9932	5.26816	7.62648	5.49768	6.83331	5.6377	5.86936	5.16215	6.7712	6.2368	6.55217	6.52106	6339	ENACD, ENACDELTA, SCNED, DNACH
BAI2	adhesion G protein-coupled receptor B2	-2.57926	-1.36696	1.63e-05	0.000713	3.7237	2	1.89449	4.11775	1.97668	2.59515	4.70286	3.57794	4.34882	2.74194	5.45587	4.0447	4.58649	2.47461	4.78233	2.33074	4.45555	2.22335	4.43109	3.1054	5.56289	1.1197	4.13487	2.10339	4.2435	1.80814	3.42477	1.89914	3.25464	2.73598	3.86957	3.5682	576	BAI2, ADGRB2
GRK1	G protein-coupled receptor kinase 1	-2.57187	-1.36282	0.002619	0.034919	0.3587	2	0	0	3.2939	0	1.41661	0	0.700477	0	3.52791	0	0.915019	0	2.13744	0	0	0	2.0171	2.15621	0.784913	0	1.68215	0	0.923789	0	0.981038	0	0	0	1.16215	0	6011	GPRK1, RHOK, RK
C16orf45	chromosome 16 open reading frame 45	-2.5717	-1.36272	2.41e-06	0.000167	4.5644	2	3.35627	3.57375	5.66987	1.81609	4.74838	3.76819	4.62945	2.57978	5.66288	4.74627	4.08242	2.82325	5.49817	3.0453	5.30778	2.89183	5.61475	5.09555	5.56289	3.53072	5.89579	3.25892	4.37407	2.72886	5.45454	4.11931	3.5164	4.7046	5.54851	2.56973	89927	-
MROH2A	maestro heat-like repeat family member 2A	-2.56404	-1.35842	0.000519	0.010103	4.0321	2	3.01196	2.21279	6.0778	2.94923	4.70286	2.12654	4.7348	1.94292	5.21409	3.83681	5.22146	1.71329	5.38535	2.54517	5.04726	0.939183	3.34243	5.12444	4.40896	0.665856	4.52923	1.86304	4.2435	0	3.87129	3.93848	0.963007	4.35141	4.88126	0	339766	HEATR7B1
AAED1	AhpC/TSA antioxidant enzyme domain containing 1	-2.5639	-1.35834	5.77e-14	8.09e-11	4.7707	2	5.20463	3.77873	5.72429	4.01146	5.72129	4.15651	5.03901	3.92829	5.98768	4.82353	5.38327	3.71755	5.1009	2.54517	5.28375	3.88378	6.03922	3.74918	5.42403	4.64656	4.78182	3.89221	4.93565	3.46043	4.87	3.73168	5.17499	4.16883	4.61589	4.15265	195827	C9ORF21
EGR3	early growth response 3	-2.55802	-1.35503	3.47e-06	0.000224	4.5618	2	3.35627	3.77873	3.67168	0.880037	5.06853	3.10014	5.93083	4.17545	6.23832	4.78542	5.6354	3.79855	5.58248	2.54517	4.83213	4.05281	5.65893	3.21689	5.76821	2.50895	4.30575	3.04506	4.2435	4.10956	4.05156	4.06152	5.21241	2.9013	4.61589	4.73727	1960	EGR-3, PILOT
KLHL32	kelch-like family member 32	-2.55547	-1.35359	0.002804	0.036979	0.2405	2	0.626283	0	2.78067	0	0.875615	0	1.52363	0	0	0	0.915019	0	0	0.852901	1.85504	0	0	1.25276	0	0	2.43779	0.730693	1.88412	0	2.55322	0	0	0.85509	2.84589	0.99088	114792	BKLHD5, KIAA1900, UG0030H05, DJ21F7.1
DGAT2L6	diacylglycerol O-acyltransferase 2-like 6	-2.55503	-1.35334	0.002837	0.037353	0.5618	2	1.06154	0	3.14225	0	0	0	0.700477	0	0	0	0	0	0.74843	0	0	0	0.817153	0.758289	0	0.665856	3.83333	0.730693	2.45561	0	2.29147	0.750588	0	1.38832	3.07509	0	347516	DC3
ELFN1-AS1	ELFN1 antisense RNA 1	-2.55031	-1.35067	0.00178	0.026216	0.2389	2	0	0.932761	0.984495	0	0.875615	0	3.08755	0	0	0.797647	0.915019	0.815325	1.89525	0	2.09492	0	0.817153	0.758289	2.20631	0.665856	1.68215	0.730693	0.923789	0	1.55962	0.750588	1.53542	1.38832	1.16215	0	101927125	MYCLO-2
MYCT1	myc target 1	-2.55025	-1.35064	0.001357	0.0214	1.7481	2	3.43089	0	1.56425	0.880037	2.77474	0	1.16998	1.64783	2.46333	0.797647	0.915019	0	2.34477	0	2.30054	0	0	2.85267	0.784913	0.665856	1.68215	0.730693	1.88412	0.700864	4.60723	1.6076	3.83705	2.08253	2.84589	1.9863	80177	MTLC
NGFR	nerve growth factor receptor	-2.54524	-1.3478	0.002476	0.033472	7.8534	2	3.69586	7.72084	2.78067	7.75588	9.1106	7.71819	8.96335	2.74194	9.78612	8.38988	8.94399	6.33571	9.4872	5.71678	9.60442	5.04922	9.58115	3.1054	9.89988	3.45558	3.5904	2.64973	6.01555	0.700864	3.77194	3.39981	2.93463	1.77678	3.27282	2.984	4804	CD271, GP80-LNGFR, TNFRSF16, P75(NTR), P75NTR
KRT9	keratin 9_ type I	-2.54413	-1.34717	0.000286	0.006363	5.4411	2	3.91964	4.82109	3.14225	3.23331	7.34828	4.01347	6.95575	4.33647	7.55163	4.93218	6.59461	6.41492	6.79642	4.22765	7.35131	5.08865	4.48116	3.59261	5.21527	3.29243	4.38415	2.30936	4.49379	3.8212	3.13604	3.57527	3.25464	3.80136	4.46234	3.44281	3857	CK-9, EPPK, K9
GSDMA	gasdermin A	-2.54395	-1.34707	0.000498	0.009794	8.7324	1	5.28728	8.79327	5.80227	6.55899	10.4912	8.65878	10.7976	6.74107	10.7397	8.73802	9.476	8.60438	9.98023	8.07382	9.63205	7.88182	9.88885	5.83315	9.8202	5.6346	7.30235	6.05059	5.82323	5.70844	5.96243	6.14186	6.65369	6.84613	6.82844	6.97053	284110	FKSG9, GSDM, GSDM1
CDSN	corneodesmosin	-2.54208	-1.34601	4.73e-05	0.001609	11.5083	1	9.5931	10.7669	9.39932	8.26563	12.94	10.6829	13.3945	11.3406	13.1971	10.7767	11.854	11.0885	12.5446	10.3141	12.4324	9.73847	13.0484	9.91428	12.7549	10.3874	11.2074	10.1002	9.29889	10.0249	9.33039	10.1454	9.75326	10.7324	10.1687	11.0288	1041	HTSS, HTSS1, HYPT2, PSS, PSS1, S
KRTAP5-10	keratin associated protein 5-10	-2.53787	-1.34362	0.003087	0.039913	0.1951	2	0	0.932761	1.56425	0	1.80916	0.881014	2.85806	0	2.25169	0	3.0152	0	0.74843	0.852901	0.72631	0	0	1.25276	2.20631	0	0	0	0	0	2.29147	0	0	0	0	0	387273	KRTAP5.10
KRT14	keratin 14_ type I	-2.52697	-1.33741	2.36e-05	0.000942	15.1968	1	14.4101	15.105	14.2449	13.9654	17.3854	15.1664	16.4201	14.2155	17.0684	15.0851	16.2081	14.8774	16.4871	14.1591	15.8041	14.1916	15.3141	12.6415	15.8591	12.8848	14.6813	13.2907	13.8062	13.4581	13.6292	13.8152	13.4674	13.5698	13.7728	13.8723	3861	CK14, EBS3, EBS4, K14, NFJ
CD320	CD320 molecule	-2.52696	-1.3374	8.77e-17	4.18e-13	6.7936	2	7.53352	6.59152	7.61284	6.17863	8.29866	6.07664	6.53731	5.97442	7.15448	6.18213	6.97578	5.49385	7.80315	5.18863	7.07844	5.96506	7.05325	6.41551	6.95313	5.96771	7.0371	6.28825	7.14815	5.5049	7.66937	5.89949	6.8205	5.40096	7.30573	5.59679	51293	8D6, 8D6A, TCBLR
RASSF8	Ras association (RalGDS/AF-6) domain family (N-terminal) member 8	-2.52613	-1.33693	0.000295	0.006536	2.437	2	2.09136	1.4946	3.2939	2.3791	3.08969	2.78486	3.82027	2.18778	3.61909	2.78787	4.00496	0	2.13744	0.852901	3.74778	1.50329	3.87918	3.32038	3.47532	0.665856	2.93115	0.730693	3.31772	0	2.29147	2.34905	0.963007	0	2.57328	0	11228	C12ORF2, HOJ1
GOLGA7B	golgin A7 family_ member B	-2.52454	-1.33602	0.002004	0.02858	8.5792	1	4.3624	8.89868	5.29154	7.04555	10.5128	8.61299	10.0657	4.48132	10.339	8.68207	9.74228	7.72925	9.97634	7.59742	9.77252	8.09529	9.96121	4.19275	10.4704	3.10846	5.75535	4.37734	6.58634	4.83395	4.66375	2.6915	4.73514	3.62342	4.75467	4.62629	401647	C10ORF132, C10ORF133, BA451M19.3, BA459F3.4
LOC101928767	uncharacterized LOC101928767	-2.51783	-1.33218	0.000871	0.015232	2.7761	2	1.39547	2.21279	3.2939	2.12489	4.65586	1.81763	4.70053	0	3.52791	0.797647	4.68911	2.65944	4.16985	2.89705	4.7291	3.58608	2.663	2.36426	2.76212	1.46442	1.0735	1.86304	1.88412	1.17054	0	0.750588	0.963007	1.77678	2.84589	0	101928767	-
CCDC3	coiled-coil domain containing 3	-2.51485	-1.33047	0.003212	0.041199	5.6419	2	2.09136	5.29186	3.67168	3.3568	7.48901	5.66273	7.51973	1.64783	8.06679	5.89052	6.62081	4.66165	7.16784	4.65443	7.33386	3.88378	6.85861	2.15621	6.58062	0.665856	2.10889	0	1.88412	0	0	0.750588	0	2.9013	3.07509	0	83643	-
GJB4	gap junction protein_ beta 4_ 30.3kDa	-2.51397	-1.32997	1.11e-05	0.00054	9.6317	1	8.36574	9.16624	8.10849	7.92006	11.0933	8.55283	10.4059	8.30083	11.2027	9.41919	10.7797	9.41136	11.1175	8.52273	10.8258	9.09749	10.7847	8.28298	11.0221	8.80521	7.75006	8.61972	8.13847	8.56286	8.11678	8.43318	8.49889	7.44376	8.61991	8.30819	127534	CX30.3, EKV
SEMA6D	sema domain_ transmembrane domain (TM)_ and cytoplasmic domain_ (semaphorin) 6D	-2.51364	-1.32978	2.22e-05	0.0009	3.6891	2	3.19436	3.77873	4.29233	2.12489	4.00236	3.93625	4.43472	2.39705	4.9933	3.97868	4.87475	3.33861	4.85192	2.54517	5.10327	3.79121	4.82931	3.41694	4.83155	1.46442	3.83333	1.21342	2.67413	0.700864	3.87129	1.6076	3.39145	1.77678	3.07509	2.79168	80031	-
BAI1	adhesion G protein-coupled receptor B1	-2.5122	-1.32895	0.001116	0.018468	8.3841	1	4.47247	8.55607	4.21841	5.70779	8.47148	7.08393	8.60187	6.11429	10.0829	9.32102	9.20221	8.2267	9.5263	6.64607	9.79182	7.41555	10.5556	5.03599	10.8372	5.08085	6.81452	4.80925	7.24518	6.09912	5.13282	4.82269	6.83257	6.28249	4.99763	6.28572	575	BAI1, GDAIF, ADGRB1
OAF	out at first homolog	-2.50698	-1.32595	1.72e-07	1.89e-05	6.2583	2	5.70312	5.3573	6.03538	5.0043	7.20054	5.96444	6.88121	4.91455	7.85805	5.90836	6.95533	4.26549	7.27939	3.95516	6.81894	3.69229	7.55207	5.06608	7.65297	5.91259	5.97392	5.69423	4.93565	5.6377	6.11211	5.31836	6.11592	6.22125	6.08421	5.56705	220323	NS5ATP13TP2
KIZ	kizuna centrosomal protein	-2.50679	-1.32584	5.98e-05	0.001905	6.8094	2	4.92379	6.41836	4.82789	5.86168	8.30629	6.3088	7.85185	4.94817	8.38521	6.41214	8.42511	6.37586	8.17644	6.42027	8.24165	6.6842	7.99708	4.84093	7.67865	5.17754	5.18368	5.2199	5.27343	5.70844	5.28472	5.50338	4.97176	4.65913	5.65867	4.73727	55857	C20ORF19, HT013, KIZUNA, NCRNA00153, PLK1S1, RP69
CLC	Charcot-Leyden crystal galectin	-2.49767	-1.32058	0.002902	0.038012	0.1964	2	0.626283	0	2.55903	0	1.80916	0	1.80742	0	0.809399	0	1.4705	0	2.13744	0.852901	0.72631	0	2.0171	0.758289	0	0.665856	0	0.730693	0	0	2.55322	1.24181	0	1.38832	2.23686	0	1178	GAL10, GAL-10, LGALS10, LGALS10A, LPPL_HUMAN
TMEM221	transmembrane protein 221	-2.49746	-1.32046	0.000353	0.007501	3.0722	2	2.26456	2.69009	4.67047	2.3791	4.60728	2.78486	4.25748	1.27645	4.07057	3.67945	3.83632	2.01392	4.59208	0.852901	4.1177	1.90778	3.22977	3.59261	3.37835	0	2.70546	0.730693	2.19798	0.700864	3.87129	1.24181	1.53542	3.62342	3.60183	0	100130519	-
ASPRV1	aspartic peptidase_ retroviral-like 1	-2.49291	-1.31783	0.001098	0.018264	9.2615	1	6.71183	9.64212	6.92327	6.14476	11.1564	8.42441	10.3885	6.49027	11.592	8.93584	10.779	9.4728	10.6508	8.8318	9.90545	9.47577	10.1902	5.79772	10.2956	5.49147	6.9624	5.89941	7.48801	5.77587	5.86936	5.99521	6.87986	6.22125	7.49582	6.15188	151516	MUNO, SASP, SASPASE, TAPS
COL9A3	collagen_ type IX_ alpha 3	-2.4926	-1.31765	1.17e-06	9.41e-05	7.0902	1	7.19653	4.95394	6.99143	4.08475	7.67729	4.51623	7.2385	6.44388	8.39814	5.32654	7.67727	5.77974	8.0746	4.55898	7.89814	5.04922	7.80893	6.69125	8.80906	6.5129	7.37134	6.16108	7.3756	7.07524	6.37167	6.68214	6.87986	7.47689	7.0195	6.80204	1299	DJ885L7.4.1, EDM3, IDD, MED
PAPL	iron/zinc purple acid phosphatase-like protein	-2.49246	-1.31757	0.001543	0.023818	9.5199	1	5.3463	9.88751	5.82735	7.9741	10.8144	9.41877	10.6683	6.21441	11.3733	9.94089	10.3871	8.97922	10.9878	8.42122	10.2667	8.67364	11.57	5.83315	11.5642	5.92657	6.9624	5.43309	6.66497	5.91696	6.26609	5.99521	6.91433	6.57951	6.36984	6.92437	390928	-
ADAMTS5	ADAM metallopeptidase with thrombospondin type 1 motif_ 5	-2.48742	-1.31465	0.003334	0.042503	0.4594	2	0	0	1.56425	0	2.37127	0	0.700477	0	2.25169	0.797647	2.18345	0	0	0	0	0.939183	0	1.25276	2.20631	0	2.10889	1.21342	2.67413	0.700864	0.981038	0.750588	0	0.85509	3.07509	0	11096	ADAM-TS 11, ADAM-TS 5, ADAM-TS5, ADAMTS-11, ADAMTS-5, ADAMTS11, ADMP-2
LOC101928894	uncharacterized LOC101928894	-2.48556	-1.31357	0.003769	0.046364	1.5702	2	2.09136	0	4.29233	0	0.875615	0	0	0.775017	0	0.797647	0	0	0	0	0	0	0	2.15621	1.96049	0.665856	4.22284	0.730693	3.03152	0.700864	2.55322	1.24181	1.94415	2.08253	4.29046	0.99088	101928894	-
CCNA1	cyclin A1	-2.48404	-1.31269	2.02e-05	0.000843	9.3399	1	10.0797	6.82917	9.98566	6.45226	10.5087	6.71928	10.3757	9.91073	10.1703	7.43476	9.98979	6.17814	10.1837	5.96037	9.93565	5.52214	9.97766	8.28618	9.77448	8.81087	9.83675	8.47483	9.04082	8.6075	9.39651	8.75825	8.63258	9.04544	9.68686	9.91689	8900	CT146
CERCAM	cerebral endothelial cell adhesion molecule	-2.48378	-1.31254	6.64e-09	1.38e-06	9.4283	1	8.71833	8.20253	8.78588	8.22163	10.6836	8.2559	10.5264	8.93127	10.682	8.52034	10.6664	8.64602	10.8323	8.03	10.7722	8.40742	9.83331	8.54043	10.0011	8.75321	8.99176	8.63655	8.68289	8.98231	8.82918	8.54548	8.91954	8.54021	8.65134	8.87352	51148	CEECAM1, GLT25D3
GLIS1	GLIS family zinc finger 1	-2.47787	-1.3091	0.000346	0.007363	4.3645	2	2.8031	0.932761	5.58418	3.93425	4.60728	0.881014	1.52363	3.02008	5.91758	4.10784	4.08242	2.01392	4.95039	2.07879	4.1177	1.90778	5.28896	2.98456	6.20988	3.53072	6.77141	3.68592	3.18171	4.76925	3.87129	3.30337	3.92984	3.95974	3.86957	4.50606	148979	-
KCNK13	potassium channel_ two pore domain subfamily K_ member 13	-2.47521	-1.30755	0.003379	0.0429	0.6586	2	1.89449	0	3.77843	0	0	0	1.16998	0.775017	0.809399	0.797647	0.915019	0	0	0	0.72631	0.939183	0	1.25276	0	1.1197	3.12626	1.21342	2.67413	0.700864	1.97146	0	0.963007	0.85509	2.23686	0	56659	K2P13.1, THIK-1, THIK1
SNAI3-AS1	SNAI3 antisense RNA 1	-2.47476	-1.30729	3.9e-05	0.001389	4.2036	2	2.41918	4.26142	4.29233	2.59515	5.47278	3.57794	5.52366	1.64783	5.70511	3.5028	5.25531	3.94806	5.49817	3.87816	5.56872	4.34101	5.17187	4.0793	5.24307	2.89755	2.70546	2.10339	3.18171	2.72886	4.21179	3.0887	2.52277	2.73598	3.60183	2.56973	197187	-
EBP	emopamil binding protein (sterol isomerase)	-2.47193	-1.30564	0.000156	0.004081	11.457	1	9.8475	11.1898	10.0173	11.0231	13.3459	10.8948	12.5461	9.53128	12.7802	10.7154	13.0981	11.2493	12.9037	11.2581	12.9571	11.4508	12.1906	9.56243	12.2393	9.38973	9.44013	9.73862	10.0626	9.294	9.6744	9.52094	9.06728	8.93056	9.75044	9.11873	10682	CDPX2, CHO2, CPX, CPXD
RHEBL1	Ras homolog enriched in brain like 1	-2.46466	-1.30139	5.95e-06	0.000336	2.6562	2	2.91131	2.69009	3.77843	1.81609	3.66529	2.95109	1.52363	0	3.78578	2.44084	3.83632	1.71329	3.084	3.17972	3.67573	2.89183	3.63562	2.15621	3.56618	1.46442	3.12626	1.57449	3.18171	1.17054	2.29147	1.24181	2.74334	2.08253	3.7419	1.57279	121268	RHEBL1C
ARNT2	aryl-hydrocarbon receptor nuclear translocator 2	-2.46254	-1.30015	1.17e-05	0.000562	4.0769	2	3.50183	3.57375	4.05814	2.94923	4.74838	4.51623	4.98309	2.18778	5.68415	3.97868	5.18681	3.33861	5.64263	3.41597	5.1834	2.89183	5.26057	3.59261	4.25359	1.97546	3.45164	1.21342	4.17351	1.80814	3.42477	3.93848	4.17701	4.03286	3.44668	2.30731	9915	WEDAS, BHLHE1
ITGA7	integrin_ alpha 7	-2.45849	-1.29777	0.000137	0.00365	4.036	2	3.91964	4.04017	5.21758	1.42269	5.99117	3.10014	4.47583	2.18778	5.18454	1.30832	4.00496	2.47461	4.67122	2.33074	3.14614	3.58608	4.79011	5.12444	4.50396	1.74245	4.30575	1.57449	4.2435	1.17054	3.42477	3.6556	3.10349	4.10244	5.62288	3.15367	3679	-
IL2RB	interleukin 2 receptor_ beta	-2.45765	-1.29728	0.00119	0.019307	1.4415	2	1.06154	0.932761	1.56425	2.12489	2.58706	2.12654	3.45952	0.775017	3.32622	2.44084	2.18345	0	2.13744	0.852901	1.85504	0	2.47808	1.62033	3.47532	0	2.70546	0	1.88412	0	0.981038	0.750588	0.963007	1.77678	1.16215	0	3560	CD122, IL15RB, P70-75
PCYT1B	phosphate cytidylyltransferase 1_ choline_ beta	-2.45685	-1.29681	0.000882	0.015386	3.0294	2	1.89449	1.89793	4.42969	1.81609	4.65586	2.12654	3.94261	0	4.77277	3.0674	3.74398	1.71329	3.48536	1.3853	4.79859	1.90778	3.63562	3.59261	4.01638	0.665856	3.71697	1.21342	2.45561	0	1.55962	2.96805	0	3.88272	2.57328	0.99088	9468	CCTB, CTB
GLI1	GLI family zinc finger 1	-2.45465	-1.29552	0.000457	0.009172	3.8113	2	2.41918	3.95818	1.56425	4.15449	5.10399	4.56834	5.40097	1.64783	3.78578	3.90949	4.73781	2.01392	5.33764	2.73181	4.79859	1.50329	5.4485	1.62033	5.64856	1.46442	4.22284	1.86304	1.88412	2.42716	3.13604	2.14156	2.26227	2.33467	3.27282	2.30731	2735	GLI
DPF1	D4_ zinc and double PHD fingers family 1	-2.45297	-1.29453	0.000123	0.003346	4.7059	2	4.4367	4.45321	5.87624	3.23331	6.66071	4.08676	4.7348	3.92829	5.35338	3.18918	4.29259	2.47461	4.95039	0.852901	4.1177	2.22335	5.54583	5.6466	5.89632	4.17063	5.26881	3.04506	4.93565	1.17054	5.13282	4.17488	3.5164	4.87335	5.91694	1.57279	8193	BAF45B, NEUD4, NEURO-D4
SLC20A1	solute carrier family 20 (phosphate transporter)_ member 1	-2.44981	-1.29267	2.73e-09	6.92e-07	8.9261	1	8.81203	8.58025	8.09306	8.40092	9.81923	8.90155	9.97541	8.23765	10.033	8.96384	9.50969	7.74466	10.0429	7.79886	9.70626	7.5698	9.78179	7.56288	10.4096	7.83276	8.51806	7.49479	8.51616	7.47074	8.85975	7.50123	8.95309	7.77739	8.30116	8.08506	6574	GLVR1, GLVR-1, PIT1, PIT-1
CNTNAP4	contactin associated protein-like 4	-2.44933	-1.29239	0.001053	0.017735	1.7492	2	2.55882	1.4946	3.43112	0	3.34805	0.881014	2.04447	1.94292	2.46333	1.98297	0	0.815325	0.74843	0.852901	1.20715	0.939183	0	2.15621	0	1.46442	3.45164	1.21342	3.76121	1.17054	2.55322	1.24181	3.73788	1.38832	2.57328	0.99088	85445	CASPR4
TMC7	transmembrane channel-like 7	-2.44725	-1.29116	1.21e-08	2.24e-06	6.0368	2	5.83261	6.18597	6.30906	4.88628	6.62455	5.86378	6.94846	3.45377	6.94136	6.23964	6.73316	5.04033	6.85691	4.40281	6.87632	5.27109	7.01127	5.56466	7.34828	4.86554	5.84124	4.54972	6.32092	4.51675	5.74389	4.17488	6.21143	5.80744	5.88707	4.68285	79905	-
NLRP10	NLR family_ pyrin domain containing 10	-2.4388	-1.28617	4.33e-06	0.000267	3.4442	2	2.8031	2.88019	3.87781	0	3.22464	2.38082	5.21926	3.14132	4.51235	3.0674	3.30099	2.97035	3.99632	1.3853	3.51985	2.89183	4.57639	2.7075	4.45724	2.50895	4.13487	2.64973	4.31026	1.52428	3.87129	2.96805	2.52277	3.18408	4.37896	4.07025	338322	CLR11.1, NALP10, NOD8, PAN5, PYNOD
SPRR4	small proline-rich protein 4	-2.42822	-1.2799	0.002802	0.036969	11.3674	1	6.44105	11.0057	7.2728	8.69226	13.126	10.6417	12.5013	8.83344	13.5664	11.1015	12.8325	11.5744	12.9694	11.0066	12.9208	11.4246	12.6074	7.78267	12.4608	7.90514	8.33279	7.74589	7.42162	7.60658	5.93972	8.12293	6.7071	8.66621	6.5136	8.44528	163778	-
GATA6	GATA binding protein 6	-2.42511	-1.27805	1.68e-05	0.000731	4.3423	2	2.91131	2.21279	4.61394	2.78303	4.65586	3.35873	4.92491	3.14132	5.8995	4.43772	5.25531	3.10382	4.98178	3.95516	5.996	4.05281	5.7638	3.32038	5.58479	3.67018	4.22284	2.79388	5.0956	3.46043	1.97146	3.39981	2.74334	3.52548	3.7419	4.50606	2627	-
PLEK2	pleckstrin 2	-2.42494	-1.27795	9.02e-09	1.76e-06	8.3255	1	7.6822	7.87402	8.22631	8.06746	9.71275	8.01899	8.77447	6.32092	9.40724	8.10661	9.45976	7.64961	9.43713	7.86021	9.16719	7.81286	9.40589	6.83798	9.12335	6.79784	8.44221	6.81307	7.78651	7.37613	7.74336	6.74775	7.80801	7.16351	8.07481	7.46562	26499	-
CALHM2	calcium homeostasis modulator 2	-2.42311	-1.27686	0.000306	0.006701	4.6191	2	3.43089	4.86674	2.55903	5.0043	5.89325	4.406	6.00291	2.18778	5.93542	4.70603	5.93594	2.97035	5.92687	3.87816	6.18951	4.52473	5.17187	2.15621	6.0459	1.97546	3.71697	2.64973	3.76121	2.97824	4.1339	2.14156	4.25081	3.0496	1.79735	2.984	51063	FAM26B
HES6	hes family bHLH transcription factor 6	-2.42158	-1.27595	1.07e-07	1.32e-05	6.9183	2	6.52008	5.99358	6.82708	5.27869	8.45784	5.82146	8.15048	6.21441	8.16083	5.57018	8.30905	5.56503	7.72648	5.67186	8.05901	5.98609	7.20251	6.21524	7.54541	6.29314	6.09542	6.91119	5.95425	6.0039	6.43799	6.44282	6.55517	5.53284	6.08421	6.77628	55502	C-HAIRY1, HES-6, BHLHB41, BHLHC23
KIAA1045	PHD finger protein 24	-2.42046	-1.27528	5.79e-05	0.001854	2.3838	2	1.39547	0	2.55903	0	2.77474	1.81763	2.728	2.18778	3.32622	1.98297	3.0152	1.33307	2.68699	2.07879	3.24903	1.50329	3.34243	2.85267	2.20631	1.46442	4.59664	1.57449	3.66245	1.80814	3.13604	1.6076	1.94415	3.0496	3.44668	1.9863	23349	KIAA1045, PHF24
CARD18	caspase recruitment domain family_ member 18	-2.41828	-1.27398	0.000413	0.008476	10.2452	1	8.00578	9.85106	8.89962	7.76705	11.806	8.42794	11.1094	8.58625	11.7003	9.39249	12.1834	10.3478	11.5486	10.0124	11.6467	11.1082	11.4996	7.80068	10.9464	8.08729	9.08273	8.35209	8.37125	8.2407	7.99539	7.81284	8.12006	8.48266	8.44134	8.32605	59082	ICEBERG, UNQ5804, PSEUDO-ICE
GPSM1	G-protein signaling modulator 1	-2.40973	-1.26887	0.00183	0.026761	8.3085	1	4.73055	8.89318	4.29233	6.72864	9.71562	8.29121	8.93231	5.6044	9.72842	8.84612	8.45454	7.71888	9.42719	7.03994	8.67487	7.39996	10.5716	4.44258	10.7979	4.86554	6.51682	4.62876	6.18522	5.61947	5.98479	4.75137	6.7071	5.67666	5.79358	5.95927	26086	AGS3
LOC100507540	NA	-2.40827	-1.268	0.000334	0.007151	2.7614	2	1.66645	0	3.2939	0	3.92519	1.81763	3.68659	1.27645	4.81195	2.22999	4.22588	2.47461	3.084	2.33074	3.8164	3.05997	3.54436	2.7075	4.19784	1.74245	1.0735	1.57449	1.48243	2.97824	1.97146	1.24181	2.74334	3.30708	3.44668	0.99088	-1005	NA
EPHB2	EPH receptor B2	-2.40819	-1.26795	0.000278	0.00626	7.1595	2	4.50737	6.37162	6.0778	7.54484	7.71217	6.75344	7.66898	4.43463	9.01458	7.5642	7.75622	6.13201	8.42786	5.99725	8.2786	5.96506	8.87758	6.55995	9.15845	5.49147	5.97392	5.24521	6.66497	5.67351	5.24822	5.16215	4.88172	4.9881	5.4701	4.84032	2048	CAPB, DRT, EK5, EPHT3, ERK, HEK5, PCBC, TYRO5
GEM	GTP binding protein overexpressed in skeletal muscle	-2.40516	-1.26613	0.002378	0.032458	1.9025	2	1.89449	2.69009	1.97668	1.42269	3.92519	0.881014	1.52363	0	3.78578	1.68473	2.44041	0	1.89525	0.852901	2.91533	2.22335	4.21135	2.15621	3.80877	0.665856	2.93115	1.57449	1.48243	1.52428	0	0	0	1.77678	0	0	2669	KIR
APOD	apolipoprotein D	-2.40152	-1.26395	0.000159	0.004139	7.4499	1	4.99929	6.35569	5.61331	3.47055	8.98551	5.82146	8.02108	7.08128	9.57604	6.38691	8.7995	7.09788	9.08101	6.42027	8.71137	6.57738	7.63182	6.24184	8.09956	6.67072	7.22989	6.47094	5.16939	6.04548	5.24822	6.42	5.90354	7.30306	6.93445	6.8645	347	-
CA9	carbonic anhydrase IX	-2.39707	-1.26127	1.19e-05	0.000565	7.2499	1	8.23129	6.1309	7.75687	5.36948	7.44821	4.46216	6.14984	7.14791	7.29245	6.41214	7.19217	5.83838	7.88428	4.78671	6.40537	6.80749	7.02821	6.62204	6.94468	4.54147	8.74671	6.13424	8.91241	7.1597	6.60607	6.16948	8.2153	5.78645	8.62444	7.88265	768	CAIX, MN
MFGE8	milk fat globule-EGF factor 8 protein	-2.39574	-1.26047	6.49e-05	0.002045	10.6701	1	8.81378	10.1741	8.94043	9.52429	12.1822	9.91017	11.6937	9.599	12.175	10.334	12.0409	10.3025	12.207	9.94439	11.9639	10.175	11.5815	9.47261	11.8453	9.31995	8.75041	9.62634	9.50353	9.70954	8.81677	9.22276	9.24709	8.17875	8.92924	9.66822	4240	BA46, EDIL1, HMFG, HST19888, MFG-E8, MFGM, OACGD3S, SED1, SPAG10, HP47
ISLR	immunoglobulin superfamily containing leucine-rich repeat	-2.39263	-1.2586	0.001265	0.020234	6.7042	2	3.75514	2.47109	5.61331	0.880037	7.65953	2.38082	5.98878	7.11868	8.9806	5.90836	7.61997	4.26549	7.50677	2.89705	8.18438	4.13043	7.65927	6.26797	8.61521	6.38712	7.14236	6.05059	4.60433	6.34094	4.42301	5.66735	5.75928	6.15728	5.82542	6.26734	3671	HST17563
SPATA22	spermatogenesis associated 22	-2.39224	-1.25836	0.003185	0.040908	1.0019	2	0.626283	0.932761	2.78067	0.880037	0	0.881014	1.16998	0.775017	2.46333	0	3.9231	1.33307	0	0	2.48048	1.50329	2.82688	1.25276	1.29041	0.665856	2.43779	0	0.923789	0.700864	0.981038	0	0	1.38832	1.79735	1.57279	84690	NYD-SP20, NYDSP20
MCAM	melanoma cell adhesion molecule	-2.38756	-1.25554	0.001104	0.018308	7.2955	2	4.9494	7.37872	4.87676	6.53303	8.5571	7.38205	8.67649	3.45377	9.43259	7.39734	8.66747	7.48195	8.67107	6.47359	8.5368	6.88792	8.0353	4.0793	8.5303	4.50467	4.72269	4.54972	5.05725	4.66639	5.76987	4.37795	6.28353	4.74867	5.20552	4.98228	4162	CD146, MUC18
ATP12A	ATPase_ H+/K+ transporting_ nongastric_ alpha polypeptide	-2.37124	-1.24564	0.000317	0.006891	12.5265	1	9.85345	12.1957	10.2073	10.9514	12.7759	11.9279	13.811	11.8039	14.2899	12.6247	13.4242	12.2808	13.9523	11.0821	13.5426	11.3275	14.2536	10.4849	14.2477	10.9065	11.9596	10.6582	10.1755	10.6554	10.277	10.6965	10.9433	11.0746	10.5	12.3943	479	ATP1AL1
ISLR2	immunoglobulin superfamily containing leucine-rich repeat 2	-2.37089	-1.24543	0.001212	0.019605	3.2495	2	2.26456	2.47109	3.14225	0	1.41661	2.38082	1.16998	1.27645	5.0599	3.40564	1.4705	2.01392	3.29859	1.77332	3.67573	2.89183	5.2316	3.74918	5.62761	0.665856	3.5904	2.10339	3.85363	2.97824	3.87129	1.89914	0.963007	3.18408	4.54116	2.30731	57611	LINX
AADAT	aminoadipate aminotransferase	-2.36095	-1.23937	8.23e-06	0.000424	3.7306	2	3.50183	3.77873	3.14225	2.78303	4.83532	3.76819	5.01132	3.25316	5.0599	3.40564	4.99981	4.14676	4.27493	2.89705	4.53914	3.34687	4.62174	1.62033	4.54922	2.50895	4.13487	2.48956	4.17351	3.08844	3.55001	0	2.74334	2.54923	3.44668	2.79168	51166	KAT2, KATII
CXCL11	chemokine (C-X-C motif) ligand 11	-2.36069	-1.23921	0.003029	0.039276	2.5249	2	1.06154	1.89793	2.97276	3.3568	2.94079	3.10014	0	0.775017	2.00358	2.9344	4.63871	1.33307	3.79901	2.07879	4.00461	1.90778	5.04443	1.25276	4.13986	0.665856	0	1.21342	2.19798	0.700864	1.55962	0.750588	2.26227	0	2.84589	0	6373	H174, I-TAC, IP-9, IP9, SCYB11, SCYB9B, B-R1
MRC2	mannose receptor_ C type 2	-2.35973	-1.23862	0.000518	0.010089	9.6398	1	7.31454	9.58008	7.25443	9.33451	10.5202	9.5718	10.189	8.27125	11.4744	10.1882	10.3396	9.02622	11.0217	7.89483	10.9838	8.10974	10.8535	7.23228	11.7774	7.47675	8.46944	7.55167	7.92075	8.16726	7.72355	7.28469	8.15892	7.77739	7.21247	8.25322	9902	CD280, CLEC13E, ENDO180, UPARAP
CKMT1B	creatine kinase_ mitochondrial 1B	-2.35701	-1.23696	7.18e-08	9.62e-06	6.3148	2	5.9129	6.16784	6.49273	5.68441	7.80125	5.77786	7.50492	5.56159	7.34681	5.37867	7.34143	6.16293	7.05434	5.96037	6.65998	6.40066	6.40619	4.13714	6.89296	5.08085	6.97512	4.4661	6.54536	5.171	5.74389	4.00131	5.5116	5.50741	6.4124	5.3397	1159	CKMT, CKMT1, UMTCK
GMPR	guanosine monophosphate reductase	-2.35584	-1.23624	0.001229	0.019807	2.386	2	2.26456	0	4.1405	0	2.77474	0	2.85806	1.27645	3.52791	0.797647	3.0152	1.71329	2.96341	0	2.30054	0.939183	1.71623	3.82153	2.90822	1.74245	3.12626	2.10339	2.45561	0	3.96424	2.6915	3.10349	3.0496	3.98685	0.99088	2766	GMPR1
TMEM45A	transmembrane protein 45A	-2.35127	-1.23344	0.000495	0.009748	12.791	1	10.4305	12.4043	11.1916	11.8093	13.9655	11.6706	13.8929	11.8455	14.4179	12.3496	14.6035	12.7831	14.1397	12.4813	14.3602	12.9754	13.7818	10.6824	13.8109	10.8739	11.1084	11.4277	11.0866	10.7559	10.0199	10.7328	10.0595	10.3479	10.868	10.9999	55076	DERP7
DEPDC1B	DEP domain containing 1B	-2.34858	-1.23179	1.05e-12	9.67e-10	4.7966	2	5.42142	4.45321	5.66987	4.84468	4.95664	4.28664	5.01132	4.48132	5.27143	4.10784	6.13085	3.94806	5.26296	4.40281	5.42229	4.40488	5.4485	3.32038	5.47181	4.12286	5.09322	4.07266	5.16939	3.61572	5.63501	4.17488	4.45194	3.42041	4.81935	2.56973	55789	BRCC3, XTP1
VASH2	vasohibin 2	-2.34231	-1.22793	0.002254	0.031313	1.4341	2	1.66645	1.4946	4.42969	0	1.41661	0	2.58504	0	0.809399	0	2.18345	1.33307	2.13744	0	1.85504	0	1.71623	2.36426	2.41628	1.74245	3.12626	1.21342	1.88412	1.17054	0.981038	1.6076	0.963007	2.08253	2.23686	0.99088	79805	-
CPT1C	carnitine palmitoyltransferase 1C	-2.33433	-1.22301	3.57e-05	0.001305	5.1649	2	3.97055	4.99564	6.25463	3.3568	6.6367	4.96809	6.3838	3.25316	6.05454	4.5781	6.41162	4.37518	5.54094	4.60749	5.46567	3.69229	5.82325	5.83315	6.16697	3.29243	5.63225	3.82667	4.84849	2.42716	4.77056	4.22839	2.74334	5.05983	5.15629	3.15367	126129	CATL1, CPT1-B, CPT1P, CPTI-B, CPTIC, SPG73
LYG2	lysozyme G-like 2	-2.33242	-1.22183	0.000116	0.003199	3.7869	2	2.91131	3.33475	5.13962	2.3791	3.92519	2.38082	5.11904	2.18778	4.25244	2.78787	5.55615	3.71755	4.70922	3.0453	4.36682	4.73814	4.2695	3.21689	5.00398	2.35207	4.9967	2.64973	2.67413	2.72886	2.29147	2.96805	1.94415	3.42041	3.60183	0.99088	254773	LYGH
DHDH	dihydrodiol dehydrogenase (dimeric)	-2.32952	-1.22003	4.72e-05	0.001609	5.1203	2	4.3624	4.72519	5.21758	2.3791	6.37172	4.75978	4.20955	3.5445	5.35338	4.89687	6.21925	3.94806	5.54094	3.71061	4.36682	5.90005	6.4191	5.36128	5.72942	1.97546	5.53249	3.75801	6.35294	3.94354	4.05156	3.93848	5.35309	3.71513	6.71402	3.5682	27294	2DD, HUM2DD
TUBB3	tubulin_ beta 3 class III	-2.32866	-1.2195	1.52e-07	1.73e-05	8.3073	1	8.5465	6.75827	9.01054	6.41011	9.45921	6.2301	8.18807	8.53738	9.12952	7.40364	8.48695	6.14755	8.86868	6.36491	8.12136	6.57738	9.13581	7.70352	9.34804	7.58207	9.54624	7.40783	7.74488	8.19216	8.42136	7.65081	8.35989	7.92873	8.61536	8.56295	10381	CDCBM, CDCBM1, CFEOM3, CFEOM3A, FEOM3, TUBB4, BETA-4
HMGCS1	3-hydroxy-3-methylglutaryl-CoA synthase 1 (soluble)	-2.32764	-1.21887	0.000856	0.01501	12.1362	1	10.2026	11.908	10.1475	11.6614	13.5788	12.0611	13.958	10.2212	13.6623	11.8735	13.4291	12.1991	13.3419	12.0083	13.58	11.6289	12.9335	9.60661	13.3751	9.86295	10.132	9.8177	9.83075	9.47734	10.0117	9.88188	9.81539	10.0887	9.72112	10.0784	3157	HMGCS
CSPG4	chondroitin sulfate proteoglycan 4	-2.32689	-1.2184	0.000597	0.011278	6.1023	2	4.01973	5.25799	4.67047	6.25999	7.19233	5.51123	5.69009	5.27404	7.84395	6.52052	6.2363	2.82325	7.4235	3.0453	6.90022	4.20409	7.78421	4.94175	8.28821	4.46691	3.941	4.12812	5.62769	5.67351	4.5484	5.04773	6.09603	4.16883	3.60183	5.81491	1464	HMW-MAA, MCSP, MCSPG, MEL-CSPG, MSK16, NG2
ACTN1	actinin_ alpha 1	-2.32563	-1.21762	8.38e-07	7.09e-05	10.8008	1	10.4587	9.32392	10.1783	9.15898	11.5835	9.63425	11.9031	10.5605	12.2478	10.3993	11.5269	9.39842	11.8378	8.54158	11.7081	8.73705	11.6539	9.73273	12.1013	10.0179	10.8559	9.85927	10.0121	10.3902	10.1443	10.4258	10.3302	10.4747	10.0372	10.9576	87	BDPLT15
STMN3	stathmin-like 3	-2.32497	-1.21721	1.42e-06	0.000111	6.7105	2	5.74759	6.05404	6.01369	6.35192	8.15395	5.63856	6.89643	5.68639	8.25978	6.9746	7.58713	5.54169	7.52818	4.78671	7.5151	4.7869	7.68621	5.40902	7.8557	6.1926	6.44548	5.34221	5.49049	6.13808	6.54719	5.26815	7.20166	6.50438	5.97488	6.26734	50861	SCLIP
VPS37D	vacuolar protein sorting 37 homolog D (S. cerevisiae)	-2.32241	-1.21562	5.18e-06	0.000305	3.7905	2	3.69586	1.4946	4.36264	3.23331	5.76624	3.47249	4.30387	2.39705	4.81195	3.5028	4.29259	3.33861	4.8855	2.33074	4.27227	3.34687	3.87918	4.69451	4.30726	2.77928	3.29811	2.48956	4.55012	2.42716	3.13604	3.20002	4.01702	3.18408	3.98685	2.30731	155382	WBSCR24
GAL	galanin/GMAP prepropeptide	-2.32133	-1.21495	0.001748	0.025834	1.6234	2	3.01196	0.932761	3.43112	0	1.80916	1.42403	2.04447	2.57978	1.70374	0	0.915019	0	0.74843	0	0.72631	0.939183	1.71623	1.62033	3.16235	2.17602	3.29811	0.730693	3.18171	1.52428	3.28761	0.750588	2.52277	2.33467	1.79735	0.99088	51083	GAL-GMAP, GALN, GLNN, GMAP
BMX	BMX non-receptor tyrosine kinase	-2.31816	-1.21298	0.001868	0.027119	1.0355	2	1.06154	0	3.14225	0.880037	0.875615	0.881014	1.80742	1.27645	2.64786	1.68473	2.44041	0.815325	2.13744	0.852901	0	0	2.663	0	0.784913	1.1197	2.70546	1.21342	2.45561	0	1.55962	1.89914	0.963007	1.38832	1.79735	0.99088	660	ETK, PSCTK2, PSCTK3
IGFL2	IGF-like family member 2	-2.31626	-1.2118	0.000239	0.005565	9.7053	1	8.08589	7.96079	8.94043	5.77576	11.4696	7.16231	10.4835	9.46604	11.3468	8.07536	11.42	8.63227	10.9456	8.10795	10.2192	9.70397	10.9791	9.00779	10.0072	9.00946	8.54391	10.0669	8.68604	9.22329	7.80748	8.85073	8.07506	7.91429	8.77472	8.76965	147920	UNQ645, VPRI645
NOX5	NADPH oxidase_ EF-hand calcium binding domain 5	-2.31277	-1.20962	5.48e-06	0.000315	4.9394	2	3.27759	4.99564	5.49307	3.3568	5.36001	3.47249	5.98878	4.57038	6.40131	4.48605	5.6354	4.08352	5.95877	4.86861	5.50777	4.40488	6.31249	3.95616	6.4673	3.9142	5.13916	3.44514	4.17351	3.94354	3.87129	4.46968	3.83705	3.52548	4.46234	4.30455	79400	-
GAL3ST4	galactose-3-O-sulfotransferase 4	-2.3116	-1.20889	0.001239	0.019913	5.553	2	2.91131	5.47989	5.01417	5.58687	6.67256	5.94486	6.45748	2.8877	7.36009	5.81685	6.64654	5.28484	6.78756	4.82824	6.75044	4.83407	6.44456	4.48774	7.27609	1.97546	4.66104	3.44514	4.37407	2.2488	4.82114	1.6076	4.01702	3.71513	4.19618	1.57279	79690	GAL3ST-4
ETV5	ets variant 5	-2.30921	-1.2074	0.001056	0.017767	6.2476	2	4.01973	6.22155	4.82789	5.81936	7.62943	6.49533	7.64666	4.38639	7.46826	6.58851	8.16959	5.34	7.80315	5.64886	7.72153	5.46335	7.06971	3.95616	7.20718	4.0223	4.30575	4.90762	4.09994	4.16091	3.28761	4.37795	4.25081	3.88272	3.98685	3.88982	2119	ERM
CCDC136	coiled-coil domain containing 136	-2.30296	-1.20349	0.00135	0.02133	1.4117	2	2.26456	1.4946	3.97079	1.42269	2.11742	0	2.04447	0	1.70374	1.98297	2.18345	0.815325	1.23874	0.852901	1.85504	0	1.71623	1.91301	2.20631	0.665856	2.93115	1.21342	2.67413	0.700864	2.55322	2.34905	0	1.77678	1.79735	0	64753	NAG6
SGTB	small glutamine-rich tetratricopeptide repeat (TPR)-containing_ beta	-2.2976	-1.20013	1.74e-07	1.9e-05	5.0563	2	4.87117	3.19855	5.32714	4.08475	5.97211	3.85466	6.39456	4.88012	6.37539	4.53281	6.07509	4.42705	6.07973	5.12339	5.87252	5.20086	5.82325	4.2463	5.39952	3.9142	5.30956	4.01498	4.37407	3.88367	4.48707	4.59719	4.17701	3.42041	4.88126	4.30455	54557	SGT2
LUM	lumican	-2.29444	-1.19814	0.001858	0.027035	2.8444	2	2.68613	0	4.36264	4.01146	3.66529	0.881014	2.248	2.18778	3.52791	2.44084	4.15593	1.71329	3.48536	0.852901	3.24903	1.50329	4.2695	3.21689	2.59954	2.35207	3.941	1.86304	5.05725	1.80814	0	1.89914	0	2.54923	2.57328	0	4060	LDC, SLRR2D
MATN3	matrilin 3	-2.29364	-1.19764	0.001448	0.022631	1.9796	2	2.8031	1.4946	4.36264	0	2.11742	0	1.16998	0.775017	2.46333	0	2.44041	2.01392	2.68699	2.33074	1.85504	0.939183	2.663	3.1054	2.41628	1.74245	3.941	0.730693	2.86387	1.80814	2.29147	0	0.963007	2.08253	2.84589	1.9863	4148	DIPOA, EDM5, HOA, OADIP, OS2
APOE	apolipoprotein E	-2.29351	-1.19756	0.000244	0.005622	9.8058	1	9.8944	6.47842	10.3962	4.88628	10.6115	5.21691	8.86235	10.503	10.9348	8.66904	10.5905	7.00707	10.4648	6.43379	10.2239	8.12878	10.028	8.7542	10.8497	9.43688	10.4356	9.06378	10.6058	9.42972	10.2275	9.11856	9.8764	9.93506	10.1389	9.89311	348	AD2, APO-E, LDLCQ5, LPG
BEST2	bestrophin 2	-2.2904	-1.1956	0.000526	0.010194	5.0437	2	3.56945	3.67988	5.36189	2.3791	5.91337	2.12654	5.77488	4.05716	6.29472	3.59383	6.03669	2.65944	6.88208	3.52101	6.01071	2.48213	6.12046	5.79772	6.55866	4.92246	4.9459	5.24521	3.55644	3.54017	4.1339	4.82269	1.94415	4.16883	4.09531	4.56743	54831	VMD2L1
PYCARD	PYD and CARD domain containing	-2.28539	-1.19244	0.000102	0.002906	9.3676	1	7.99352	8.75432	8.24039	8.74972	11.2961	8.06506	9.90755	8.08353	10.5907	8.6638	10.9853	9.29055	10.6459	9.02724	10.6872	9.57802	10.0675	8.03171	10.0402	7.59526	8.50496	8.07708	8.3868	8.17665	7.73018	8.00139	7.22931	8.59556	8.09454	7.31273	29108	ASC, CARD5, TMS, TMS-1, TMS1
IFITM3	interferon induced transmembrane protein 3	-2.282	-1.1903	1.84e-13	2.31e-10	11.2424	1	12.3346	10.5688	11.5968	10.3914	11.8435	9.93147	10.5572	10.7666	11.0488	10.0713	11.4874	10.1136	11.7537	10.5449	11.3948	10.3885	11.1102	10.3206	11.3136	10.6218	11.9564	10.5309	11.662	10.4649	12.4547	10.6476	11.7304	11.3612	12.4039	10.1666	10410	1-8U, DSPA2B, IP15
KCNN4	potassium channel_ calcium activated intermediate/small conductance subfamily N alpha_ member 4	-2.26907	-1.1821	0.000122	0.003337	7.1546	1	8.1508	5.77153	7.82071	4.34552	7.28018	5.00638	6.70227	7.10384	7.47438	6.05973	6.09392	3.63174	7.32293	3.41597	7.0287	3.34687	7.46142	6.77562	7.93456	7.19431	8.0255	6.09302	7.50948	7.19708	7.9732	6.40845	8.62913	7.2427	8.10755	7.31273	3783	IK, IK1, IKCA1, KCA4, KCA3.1, SK4, HIKCA1, HKCA4, HSK4
SH3KBP1	SH3-domain kinase binding protein 1	-2.26618	-1.18026	5.42e-06	0.000313	8.1902	1	7.1309	7.65079	6.71058	7.77814	9.55198	7.65333	9.51752	8.02565	9.33847	8.21094	8.8585	7.61089	9.25325	6.96744	9.09824	7.43097	9.14555	6.71992	9.34804	6.4072	8.5693	6.76139	7.23663	6.75431	7.18125	6.82793	7.42531	7.13058	7.46583	7.7762	30011	CD2BP3, CIN85, GIG10, HSB-1, HSB1, MIG18
FAM64A	family with sequence similarity 64_ member A	-2.26608	-1.1802	7.56e-05	0.002314	5.3583	2	5.30722	4.39207	4.42969	5.84067	6.59993	5.15009	6.13709	3.45377	6.5593	5.18732	6.69667	5.44437	6.61816	4.82824	6.72389	5.12703	6.18231	4.34777	6.25154	3.10846	4.45852	3.68592	4.80285	3.28639	4.05156	4.3298	3.83705	3.80136	5.20552	3.30547	54478	CATS, RCS1
TRIM69	tripartite motif containing 69	-2.26401	-1.17888	0.0019	0.027472	2.0803	2	2.09136	2.21279	4.29233	0.880037	1.80916	0.881014	2.728	1.64783	2.25169	1.68473	1.4705	1.33307	2.34477	2.07879	0.72631	2.70147	1.71623	2.15621	2.59954	0.665856	4.38415	1.57449	3.31772	0	2.96665	0.750588	0	2.54923	3.60183	0.99088	140691	HSD-34, HSD34, RNF36, TRIF
CYB5R2	cytochrome b5 reductase 2	-2.26382	-1.17876	9.65e-07	7.91e-05	10.0827	1	9.95965	8.63735	9.74035	7.90497	11.4743	8.49005	10.7564	9.86525	11.2812	9.07861	11.0165	8.49624	11.3267	8.28617	10.751	8.5625	10.9371	9.7902	10.958	9.54956	10.0259	9.81981	9.71541	9.77383	9.01446	9.70915	9.20361	9.72083	9.68034	9.82564	51700	B5R.2
LRAT	lecithin retinol acyltransferase (phosphatidylcholine--retinol O-acyltransferase)	-2.25978	-1.17618	7.17e-05	0.002213	3.0802	2	2.26456	2.47109	3.2939	1.42269	3.75722	3.23522	4.10862	1.27645	3.32622	2.9344	4.53231	2.65944	4.16985	1.3853	4.49795	4.05281	4.15075	2.54606	4.13986	1.74245	3.83333	2.48956	3.03152	1.80814	3.13604	2.83639	1.53542	2.08253	2.84589	2.30731	9227	LCA14
CAMK4	calcium/calmodulin-dependent protein kinase IV	-2.25943	-1.17596	0.002654	0.035336	0.6166	2	1.89449	0.932761	1.97668	0.880037	1.41661	1.81763	1.16998	0	2.00358	0	1.87057	0.815325	0.74843	0	1.56716	0	2.47808	0.758289	2.41628	1.1197	2.10889	0.730693	1.88412	0	0	0.750588	0.963007	0.85509	1.16215	1.9863	814	CAMK IV, CAMK-GR, IV, CAMK
WIPF3	WAS/WASL interacting protein family_ member 3	-2.25942	-1.17595	0.001758	0.025974	3.2864	2	3.10604	2.21279	5.13962	2.12489	2.77474	2.95109	2.248	2.18778	3.86242	2.78787	1.4705	1.71329	2.68699	0.852901	2.64044	1.50329	2.47808	4.2463	2.76212	2.35207	5.69511	1.86304	4.49379	0.700864	4.1339	3.57527	2.26227	3.42041	5.25312	0.99088	644150	CR16
SLC6A15	solute carrier family 6 (neutral amino acid transporter)_ member 15	-2.25849	-1.17536	0.000371	0.007797	5.5635	2	5.30722	5.97285	5.58418	5.53552	6.51029	6.2621	6.66721	3.78678	6.57077	5.83562	6.7211	4.37518	6.64781	5.08964	6.82728	4.73814	6.84911	2.15621	6.47905	3.45558	4.78182	3.89221	5.40143	2.72886	4.71814	2.14156	4.5132	3.88272	4.54116	3.68356	55117	NTT73, SBAT1, V7-3, HV7-3
LOC100506844	uncharacterized LOC100506844	-2.25499	-1.17312	0.000143	0.003792	3.0043	2	2.09136	4.11775	3.67168	2.3791	4.65586	2.12654	3.28549	1.27645	4.25244	2.44084	4.68911	1.71329	3.9335	2.54517	3.8819	3.58608	3.44692	2.15621	3.16235	1.1197	2.70546	2.30936	3.31772	2.2488	2.29147	1.24181	2.74334	2.08253	3.60183	2.30731	100506844	-
TNNT1	troponin T type 1 (skeletal_ slow)	-2.25383	-1.17238	5.17e-06	0.000305	5.5005	2	5.32689	5.03617	6.37858	3.47055	7.32594	4.01347	4.92491	5.44866	5.64129	3.5028	5.68591	4.66165	5.95877	4.09783	4.17108	4.73814	5.17187	5.72414	5.06757	4.74451	6.93662	4.66671	6.27151	4.59351	6.04985	5.18939	5.05652	4.91262	6.84407	4.84032	7138	ANM, NEM5, STNT, TNT, TNTS
SCARF2	scavenger receptor class F_ member 2	-2.24988	-1.16985	3.81e-05	0.001365	3.1989	2	2.68613	3.19855	3.67168	3.23331	4.91732	3.10014	3.68659	2.74194	4.51235	3.18918	4.15593	2.01392	3.79901	1.3853	3.74778	0	3.72146	2.7075	4.30726	2.50895	2.10889	2.10339	4.17351	3.61572	3.42477	2.6915	2.52277	2.54923	3.27282	0.99088	91179	NSR1, SREC-II, SREC2, SRECRP-1, VDEGS
TEAD2	TEA domain family member 2	-2.24982	-1.16981	6.39e-12	3.81e-09	7.1078	1	6.75603	6.23901	6.8639	6.63415	8.03042	6.33911	7.51481	6.39595	7.91314	7.11184	8.17402	5.67638	8.15595	5.82331	7.83751	6.18111	8.23092	6.63213	7.82842	6.27139	7.14236	6.16108	6.86697	6.40623	7.34576	6.44282	6.56967	6.49147	7.22447	6.55175	8463	ETF, TEAD-2, TEF-4, TEF4
NRSN2	neurensin 2	-2.24823	-1.16879	0.000611	0.011498	6.7293	2	5.0236	6.7461	5.32714	6.38131	8.09791	6.5611	7.34217	4.98103	8.5036	6.73568	7.63933	6.72571	8.48921	6.21641	7.5954	6.10624	7.68621	4.8057	8.32445	5.10564	5.53249	4.4661	5.46141	4.86525	5.21077	4.71434	5.17499	5.42832	3.60183	4.98228	80023	C20ORF98, DJ1103G7.6
RTN4RL2	reticulon 4 receptor-like 2	-2.24688	-1.16792	0.003743	0.046142	2.8474	2	1.39547	0	4.1405	0.880037	4.00236	2.78486	3.45952	0.775017	4.85009	1.98297	1.4705	1.33307	4.16985	0	2.09492	1.50329	2.82688	4.73253	4.25359	0.665856	4.04119	0.730693	3.31772	1.17054	3.66524	1.6076	1.94415	1.38832	2.84589	3.15367	349667	NGRH1, NGR2
NXPH4	neurexophilin 4	-2.24684	-1.1679	0.000453	0.009129	8.616	1	7.22302	8.48831	6.61299	7.89481	9.67494	7.86605	9.28579	6.86947	10.2066	9.06872	9.7045	8.75911	9.93985	8.03445	9.83381	8.61746	9.64432	7.0181	10.1174	4.92246	7.04918	6.18742	8.04846	7.29227	6.75659	6.51995	7.85017	6.07312	8.17089	7.17165	11247	NPH4
FZD8	frizzled class receptor 8	-2.24252	-1.16512	0.001714	0.025442	3.4641	2	2.26456	2.21279	0.984495	3.23331	4.95664	2.12654	3.75498	0.775017	5.18454	4.28219	4.15593	3.33861	5.33764	1.77332	2.91533	3.88378	5.2316	1.25276	5.24307	2.35207	2.70546	2.30936	2.67413	2.58588	2.29147	1.24181	2.74334	3.0496	2.23686	2.56973	8325	FZ-8, HFZ8
LOC100129940	uncharacterized LOC100129940	-2.24042	-1.16377	0.003491	0.043792	4.2232	2	5.3463	3.19855	5.42897	1.42269	3.56709	2.95109	1.52363	4.38639	0	1.98297	0.915019	1.33307	1.60402	3.17972	2.48048	3.34687	3.63562	3.95616	4.97111	3.9142	4.66104	4.01498	5.01784	2.72886	6.71707	3.6556	6.49571	4.16883	4.81935	2.30731	100129940	-
LOXHD1	lipoxygenase homology domains 1	-2.23738	-1.16181	0.002708	0.035949	3.3782	2	2.91131	3.87124	5.46138	2.3791	3.84365	0.881014	2.42634	0.775017	3.70484	3.0674	3.74398	1.71329	2.526	2.73181	2.64044	3.58608	4.62174	4.13714	2.90822	0.665856	4.89325	1.86304	4.60433	0	3.87129	2.53041	0.963007	3.42041	5.10532	0	125336	DFNB77, LH2D1
CD164L2	CD164 sialomucin-like 2	-2.2369	-1.1615	1.58e-05	0.000701	6.9706	2	5.9387	6.56406	5.52408	4.88628	8.5539	6.35403	7.93157	6.34637	8.34237	5.40404	8.05896	6.47775	8.24918	5.94157	7.86612	6.57738	7.35801	6.2286	8.13338	5.88422	5.75535	6.3595	5.75297	6.58605	6.04985	5.41384	7.08545	6.29741	6.16109	6.65431	388611	EAPG6122, UNQ6122
EGR2	early growth response 2	-2.23685	-1.16147	0.000179	0.00448	8.724	1	7.32436	7.60438	7.53123	5.0043	9.52117	6.2934	10.0572	8.90368	10.2748	8.6559	9.7348	8.32567	9.74556	6.89111	9.74748	7.7771	9.89464	7.59419	10.1798	7.7007	8.47392	7.96732	7.80977	7.95457	6.83252	7.77288	7.59784	8.02147	7.30573	8.56671	1959	AT591, CMT1D, CMT4E, KROX20
SLC22A4	solute carrier family 22 (organic cation/zwitterion transporter)_ member 4	-2.23293	-1.15894	0.000211	0.005081	2.7176	2	3.01196	0	2.55903	2.78303	3.84365	1.81763	2.58504	0	4.13378	2.44084	3.16516	1.71329	3.65069	0	3.51985	3.05997	2.97404	2.85267	4.59309	2.77928	2.70546	1.86304	3.03152	1.52428	3.55001	2.14156	2.52277	3.42041	2.84589	2.30731	6583	OCTN1
ST3GAL5	ST3 beta-galactoside alpha-2_3-sialyltransferase 5	-2.23255	-1.15869	7.63e-08	1.02e-05	4.5699	2	3.69586	3.95818	4.67047	3.47055	5.36001	3.35873	4.76828	4.77161	4.77277	3.83681	5.32071	3.54049	4.95039	3.17972	4.86489	3.79121	5.80371	4.0793	5.58479	3.9142	4.9459	2.30936	5.51899	3.46043	4.1339	4.37795	5.17499	4.74867	5.54851	4.2306	8869	SATI, SIAT9, SIATGM3S, ST3GALV
CHRDL2	chordin-like 2	-2.23188	-1.15826	0.001301	0.020712	3.1276	2	2.91131	1.4946	3.55641	0	4.21184	0	3.94261	2.8877	4.69108	1.30832	4.53231	1.33307	4.41946	3.30267	4.69306	2.89183	3.80248	3.82153	3.04087	2.50895	3.941	2.30936	1.88412	1.52428	1.97146	2.34905	0	3.52548	3.44668	2.79168	25884	BNF1, CHL2
SERTAD4-AS1	SERTAD4 antisense RNA 1	-2.23135	-1.15792	0.004146	0.049844	2.4813	2	0	1.4946	0.984495	1.81609	3.66529	2.95109	3.53925	0.775017	3.09167	2.78787	4.73781	1.71329	3.084	3.41597	4.49795	2.89183	3.63562	0	3.47532	1.1197	2.93115	1.57449	2.67413	1.17054	0.981038	0	1.94415	1.38832	1.79735	0	574036	C1ORF133
MMP28	matrix metallopeptidase 28	-2.22729	-1.15529	2.12e-06	0.000151	4.7099	2	4.47247	4.19137	4.42969	3.23331	6.15223	4.15651	4.62945	4.05716	6.47639	4.89687	4.08242	4.08352	5.36169	2.89705	5.70164	3.88378	5.68052	4.29793	5.58479	3.37631	5.34919	4.23303	4.89273	4.59351	3.42477	3.93848	4.73514	3.80136	4.46234	3.79037	79148	EPILYSIN, MM28, MMP-25, MMP-28, MMP25
LOC101927027	uncharacterized LOC101927027	-2.22627	-1.15463	1.61e-09	4.65e-07	4.643	2	4.75979	4.26142	5.29154	4.84468	4.74838	4.15651	4.95429	4.52654	5.27143	4.48605	4.99981	3.94806	5.43155	3.61892	4.83213	4.20409	5.4231	4.01905	5.86086	3.79735	4.38415	3.61004	4.02242	2.85893	5.66301	3.0887	5.38622	3.95974	5.34386	3.44281	101927027	-
C16orf98	PYCARD antisense RNA 1	-2.22553	-1.15415	0.00123	0.019807	2.4538	2	1.89449	1.4946	2.97276	1.42269	4.60728	0.881014	2.97736	1.27645	2.95835	3.0674	3.53942	2.97035	3.29859	2.07879	3.8164	2.22335	3.63562	2.15621	1.96049	2.50895	3.12626	1.21342	2.67413	0.700864	1.55962	0	0	0.85509	3.60183	2.984	100652740	C16ORF98, PYCARDOS, PYCARD-AS1
CASP14	caspase 14_ apoptosis-related cysteine peptidase	-2.22333	-1.15272	0.000154	0.004033	7.4228	1	7.05036	6.86336	6.42861	6.51988	7.18407	4.96809	8.60881	7.04289	9.00405	7.78309	7.1834	7.58829	7.90489	6.95812	8.02679	6.854	9.15136	5.40902	8.81138	3.79735	7.98204	4.99971	8.03372	6.61396	5.96243	5.83196	6.33534	6.36975	6.67959	7.07987	23581	-
CAMK2B	calcium/calmodulin-dependent protein kinase II beta	-2.21868	-1.1497	0.003527	0.044144	4.7973	2	2.55882	3.77873	5.05721	2.3791	6.58746	3.10014	5.5813	0.775017	5.09209	3.90949	6.18454	3.71755	6.19133	1.77332	6.70592	0.939183	5.59214	5.7614	4.93746	1.97546	4.66104	1.21342	4.97733	1.52428	3.55001	4.59719	2.74334	4.29308	3.7419	5.8889	816	CAM2, CAMK2, CAMKB
KIF14	kinesin family member 14	-2.21362	-1.14641	3.51e-12	2.26e-09	5.3396	2	6.09601	3.95818	6.34424	4.71219	5.47278	4.56834	6.17502	5.58315	5.29926	5.06538	5.18681	4.61768	5.86089	4.1642	5.68339	4.63538	5.78389	5.12444	5.8428	4.0223	5.72555	4.90762	5.51899	3.75591	6.22911	4.17488	5.92624	5.12815	5.91694	4.56743	9928	MKS12
ZBTB10	zinc finger and BTB domain containing 10	-2.2048	-1.14065	0.000354	0.007507	2.9731	2	3.19436	0.932761	5.36189	2.94923	3.34805	2.12654	2.728	1.64783	3.2137	2.22999	3.16516	1.33307	2.526	0	2.78442	1.50329	2.47808	3.89041	3.16235	2.65044	3.83333	2.48956	3.94049	2.42716	3.87129	2.83639	3.10349	3.0496	4.29046	2.30731	65986	RINZF
POPDC3	popeye domain containing 3	-2.20228	-1.139	0.000311	0.006786	4.5144	2	4.60727	4.72519	3.97079	2.78303	6.54939	5.00638	5.11904	3.78678	5.45587	4.70603	5.07754	3.63174	6.06515	4.02825	5.07554	3.88378	5.56917	3.50745	5.6692	2.89755	4.38415	2.64973	4.09994	2.97824	2.29147	2.6915	3.10349	2.73598	2.84589	4.07025	64208	POP3, BA355M14.1
AHSG	alpha-2-HS-glycoprotein	-2.20192	-1.13876	0.001954	0.027985	2.4115	2	1.06154	0.932761	3.14225	0.880037	2.77474	0	3.37513	1.64783	3.52791	2.22999	4.83053	1.71329	2.68699	0	3.8164	3.34687	0.817153	2.7075	3.37835	1.97546	2.43779	1.86304	3.18171	2.97824	3.13604	0.750588	1.53542	2.08253	2.23686	1.57279	197	A2HS, AHS, FETUA, HSGA
MAGEC1	melanoma antigen family C1	-2.195	-1.13422	0.002485	0.033532	2.1756	2	2.41918	1.4946	2.78067	0	2.58706	0	1.80742	3.14132	2.64786	1.30832	4.00496	0.815325	2.83181	0	3.51985	2.22335	0.817153	2.15621	0	1.97546	3.12626	1.86304	2.67413	2.2488	3.42477	1.89914	4.32102	0.85509	1.79735	2.30731	9947	CT7, CT7.1
KIAA0040	KIAA0040	-2.1874	-1.12922	1.94e-05	0.000819	6.1656	2	5.73292	6.16784	4.49375	5.70779	7.03592	6.33911	7.52953	5.04459	7.46826	6.43694	7.26873	5.36681	7.50136	5.6255	7.26801	5.37042	6.92344	4.34777	6.7058	5.10564	5.53249	4.90762	5.62769	4.59351	5.79539	5.01766	5.59897	4.56367	5.4701	5.06971	9674	-
CHI3L1	chitinase 3-like 1 (cartilage glycoprotein-39)	-2.18232	-1.12586	0.002795	0.036939	8.0514	1	4.9494	7.63108	5.21758	6.58448	8.83012	6.87222	9.50888	6.42011	9.86391	7.72387	9.75564	8.50229	9.4596	7.73479	9.92112	8.32314	8.61702	6.13234	8.71291	6.32515	5.86877	6.63308	7.14815	6.0039	4.60723	5.45931	5.54132	6.80498	4.94062	6.30386	1116	ASRT7, CGP-39, GP-39, GP39, HC-GP39, HCGP-3P, YKL-40, YKL40, YYL-40, HCGP-39
CRISPLD2	cysteine-rich secretory protein LCCL domain containing 2	-2.17733	-1.12256	0.000192	0.004725	4.7319	2	4.47247	3.04813	5.36189	2.94923	4.557	2.12654	5.21926	5.13496	6.61574	1.68473	3.53942	3.22599	4.63219	1.77332	5.04726	3.47143	5.7638	4.65546	5.80599	4.57736	5.99906	4.96966	4.55012	3.88367	4.77056	4.37795	4.83449	4.7046	5.15629	4.44197	83716	CRISP11, LCRISP2
RASD1	RAS_ dexamethasone-induced 1	-2.17302	-1.1197	0.002491	0.033593	2.6323	2	1.06154	1.4946	2.29704	0.880037	5.03219	2.78486	4.66543	2.8877	3.43059	1.68473	3.30099	1.71329	3.57039	1.3853	2.64044	1.50329	2.97404	2.85267	1.96049	1.97546	4.04119	0.730693	2.86387	0.700864	0.981038	1.6076	1.53542	3.52548	2.57328	2.56973	51655	AGS1, DEXRAS1, MGC:26290
RPLP0P2	ribosomal protein_ large_ P0 pseudogene 2	-2.17226	-1.1192	0.000972	0.016559	5.1305	2	4.75979	4.45321	6.66957	3.47055	5.7882	3.23522	4.66543	3.35695	5.70511	5.37867	6.01709	3.94806	5.62285	3.61892	5.6649	4.58111	5.9172	5.70514	6.20988	2.50895	6.40844	4.01498	5.27343	2.58588	5.13282	4.46968	1.53542	5.96519	5.54851	0	113157	RPLP0L2, RPLP0_3_1146
LOXL2	lysyl oxidase-like 2	-2.17127	-1.11854	4.83e-05	0.001634	5.6626	2	5.56085	5.07559	6.50832	5.30959	5.47278	4.80392	3.82027	4.91455	6.65935	5.9606	5.52874	2.65944	6.33191	2.54517	5.56872	3.58608	6.96802	6.02919	7.11988	4.26167	6.22888	4.54972	6.20289	5.4646	6.07091	4.67634	6.13553	4.61219	5.9462	5.50566	4017	LOR2, WS9-14
LIPK	lipase_ family member K	-2.17049	-1.11802	0.004148	0.049844	9.5179	1	6.46788	9.8296	7.3784	8.56037	10.5788	9.36638	10.7275	7.36885	11.4088	9.16834	11.3937	9.26048	10.9241	9.55982	10.7543	9.85738	10.8313	6.67181	10.2154	7.07386	7.41867	6.87111	6.63923	6.88221	6.30215	6.55178	7.05487	6.8257	7.24816	7.2856	643414	LIPL2, BA186O14.2
MYO15B	myosin XVB	-2.17041	-1.11797	0.000331	0.007112	5.916	2	4.54145	6.16784	6.80199	4.80186	6.20216	5.00638	7.64666	3.02008	7.16208	5.73922	6.3503	5.13694	7.06902	4.55898	6.61252	4.83407	6.44456	6.66199	6.53636	3.73516	5.42533	3.44514	5.65363	3.54017	5.60645	4.98694	4.88172	6.36975	6.39128	2.984	80022	MYO15BP
PDE10A	phosphodiesterase 10A	-2.1699	-1.11763	0.000158	0.004115	3.6117	2	4.20121	1.89793	5.42897	2.59515	3.22464	2.38082	5.09285	2.57978	4.36208	3.5028	3.74398	2.47461	4.46459	0.852901	4.17108	2.48213	3.63562	3.50745	2.20631	2.77928	4.13487	2.10339	4.49379	3.19081	4.5484	4.11931	2.93463	4.10244	2.84589	3.44281	10846	HSPDE10A
TK1	thymidine kinase 1_ soluble	-2.16673	-1.11552	3.32e-11	1.55e-08	8.3532	1	8.66136	7.8286	8.34396	8.2418	9.67199	7.61047	8.69402	7.31187	9.3216	8.12198	9.2365	7.94475	9.40276	7.87515	9.1034	7.97945	8.7013	7.47589	8.97992	7.16513	8.2825	7.3565	8.50195	7.38696	8.11678	7.36453	7.72628	7.61425	8.08142	7.1815	7083	TK2
CENPI	centromere protein I	-2.16625	-1.1152	2.32e-05	0.000933	3.8754	2	3.91964	3.95818	4.29233	3.47055	4.27541	3.6762	5.70745	3.35695	4.36208	4.0447	4.41742	3.10382	4.37288	0.852901	4.69306	2.70147	5.04443	3.82153	4.63567	3.00686	4.38415	2.10339	3.18171	2.04523	4.42301	3.57527	3.10349	2.9013	3.27282	3.88982	2491	CENP-I, FSHPRH1, LRPR1, MIS6
FDFT1	farnesyl-diphosphate farnesyltransferase 1	-2.16612	-1.11511	0.000179	0.00448	12.0774	1	11.1646	11.823	10.9836	11.6231	13.5185	11.572	13.6318	10.8124	13.2871	11.5781	13.4838	11.9207	13.3314	12.0439	13.3528	11.8694	12.5784	10.5973	12.6836	10.598	10.5151	10.7854	10.8406	10.6391	10.7042	10.9618	10.326	10.3551	10.7844	10.7532	2222	DGPT, ERG9, SQS, SS
LOC100996693	CAVP-target protein-like	-2.16491	-1.11431	0.001638	0.024701	1.8315	2	1.39547	1.4946	1.56425	0.880037	1.80916	1.42403	2.04447	2.18778	3.2137	1.68473	3.64532	1.33307	3.48536	1.3853	3.74778	3.05997	1.33563	0.758289	3.27439	0.665856	2.43779	1.21342	1.88412	1.52428	1.55962	2.14156	1.53542	0.85509	2.23686	0.99088	100996693	-
LINC00669	long intergenic non-protein coding RNA 669	-2.16419	-1.11383	0.000123	0.00335	2.095	2	2.8031	0.932761	1.97668	2.59515	3.46172	2.59694	3.53925	2.18778	2.64786	1.68473	2.84783	1.71329	2.526	2.07879	3.67573	2.48213	2.47808	0.758289	2.41628	0.665856	2.10889	2.30936	2.67413	1.80814	2.77469	0.750588	2.52277	1.77678	2.23686	0.99088	647946	-
LHX5	LIM homeobox 5	-2.15813	-1.10978	0.000116	0.003199	3.7117	2	3.91964	1.89793	2.97276	2.3791	4.8769	2.38082	3.18991	3.92829	5.15438	3.59383	5.32071	2.82325	4.91831	0.852901	4.06226	2.22335	4.2695	3.1054	4.79444	3.20338	4.13487	2.79388	3.31772	2.97824	2.96665	3.57527	4.17701	4.16883	2.84589	3.79037	64211	-
FMNL3	formin-like 3	-2.15713	-1.10911	3.65e-05	0.001325	6.2927	2	5.11695	5.81876	5.49307	5.58687	6.8077	6.07664	6.9702	5.32613	7.7207	6.8135	6.80347	5.54169	7.4235	4.1642	7.35131	4.7869	7.60948	5.66638	7.93029	5.08085	5.63225	5.114	5.30651	5.48489	5.57732	5.43675	6.26584	5.55783	5.10532	5.59679	91010	FHOD3, FRL2, WBP-3, WBP3
LOC148709	actin pseudogene	-2.15587	-1.10827	0.000855	0.01501	2.8164	2	1.06154	1.89793	2.55903	1.42269	3.92519	2.95109	4.80099	1.94292	4.07057	2.9344	2.84783	3.22599	3.99632	3.0453	3.8819	2.48213	3.54436	1.91301	3.04087	1.46442	3.5904	2.30936	3.76121	0.700864	3.28761	1.89914	0.963007	2.9013	1.16215	1.57279	148709	-
CA2	carbonic anhydrase II	-2.15247	-1.10599	0.001926	0.027745	8.1005	1	6.20633	8.31386	5.66987	7.04555	9.61937	7.48731	9.88675	6.5788	9.65491	8.22525	9.53575	7.31991	9.48172	8.14128	9.07217	8.69615	8.77341	5.99831	7.95572	5.56481	6.60131	5.5993	8.13847	6.2371	5.17232	5.93211	6.59822	6.00207	6.49392	6.22987	760	CA-II, CAC, CAII, CAR2, HEL-76
BMP6	bone morphogenetic protein 6	-2.15053	-1.10469	0.000604	0.011383	4.5658	2	3.75514	4.26142	4.21841	2.3791	4.39472	1.42403	4.95429	4.52654	5.37969	4.66464	4.99981	2.82325	4.91831	1.77332	5.20915	0	5.93527	3.59261	6.35711	4.50467	5.89579	3.25892	4.17351	4.76925	4.48707	3.20002	4.83449	4.10244	4.54116	5.15214	654	VGR, VGR1
GNA14	guanine nucleotide binding protein (G protein)_ alpha 14	-2.14847	-1.10331	0.001841	0.026849	3.0538	2	3.01196	3.57375	3.77843	1.42269	4.21184	3.6762	3.94261	1.64783	4.3083	3.18918	4.73781	2.82325	3.39499	2.73181	3.34506	3.05997	4.86746	2.36426	3.56618	0.665856	3.5904	2.48956	0.923789	1.80814	1.97146	0.750588	0	2.08253	3.44668	0.99088	9630	-
BHLHE41	basic helix-loop-helix family_ member e41	-2.1461	-1.10172	0.000605	0.011389	7.3815	1	4.6391	6.52188	5.852	6.4243	7.98835	6.78682	8.7027	6.29502	8.90109	8.01899	7.99529	6.17814	8.05997	5.73872	8.60385	6.16275	8.80571	6.55995	9.19983	7.0162	6.31146	5.91526	6.76356	6.40623	6.26609	6.20994	6.72015	6.02017	4.09531	7.07987	79365	BHLHB3, DEC2, SHARP1, HDEC2
EXTL2	exostosin-like glycosyltransferase 2	-2.14442	-1.10059	1.7e-07	1.88e-05	5.5433	2	5.16146	5.29186	5.66987	4.34552	6.18571	5.53761	6.40524	4.80869	6.86891	4.78542	6.63373	5.07326	6.36799	4.74395	6.55344	5.2364	5.95313	4.53154	6.67551	5.24603	5.09322	4.80925	5.20491	4.39337	5.71743	4.67634	5.35309	5.05983	3.98685	4.2306	2135	EXTR2
C17orf96	chromosome 17 open reading frame 96	-2.14279	-1.09949	2.25e-06	0.000158	6.5507	2	7.05036	5.72271	6.32676	4.34552	7.23292	5.31168	7.3366	6.9711	7.26448	5.81685	6.11251	4.57233	6.88208	3.95516	7.05023	4.68767	7.04495	5.68589	6.94468	6.2823	7.68186	5.9618	6.13085	5.42314	7.1909	6.15573	7.04453	6.59166	7.32813	6.81475	100170841	PRR28
KCNQ5	potassium channel_ voltage gated KQT-like subfamily Q_ member 5	-2.14182	-1.09884	0.000956	0.016338	3.879	2	3.75514	4.39207	3.14225	3.67422	4.39472	4.61863	5.40097	0.775017	4.77277	4.0447	4.95931	2.65944	5.01249	3.0453	5.20915	3.79121	5.26057	2.98456	4.90302	2.17602	3.941	2.10339	2.67413	1.17054	3.13604	2.14156	3.10349	2.08253	2.84589	3.44281	56479	KV7.5
HMMR	hyaluronan-mediated motility receptor (RHAMM)	-2.14108	-1.09834	3.88e-08	5.61e-06	6.2946	2	6.3952	5.90882	6.92327	6.25999	6.57488	5.98376	6.83457	5.22001	7.0271	5.09685	7.5467	6.0681	7.24747	6.49953	7.28627	5.73591	6.95921	5.45523	7.04287	5.7648	6.11854	5.08627	5.9954	4.2105	6.42169	5.34283	5.5116	4.79144	6.28077	5.47396	3161	CD168, IHABP, RHAMM
ARHGAP25	Rho GTPase activating protein 25	-2.13988	-1.09753	0.001655	0.024815	4.6089	2	3.56945	4.32822	3.67168	4.01146	5.52603	4.34755	5.69009	2.57978	6.20927	4.96665	5.91492	4.97213	5.71911	4.09783	6.03971	4.46605	5.65893	4.13714	5.54065	1.74245	4.13487	0.730693	4.02242	1.80814	2.77469	2.83639	1.94415	3.88272	4.46234	3.44281	9938	HEL-S-308, KAIA0053
FAM178B	family with sequence similarity 178_ member B	-2.13917	-1.09705	0.004152	0.049875	4.4103	2	3.91964	2.88019	6.09856	2.94923	5.10399	2.95109	4.39241	2.18778	5.29926	1.68473	5.82763	4.47712	4.78233	2.73181	5.28375	2.89183	2.97404	5.93449	4.13986	1.1197	5.09322	2.48956	4.60433	1.52428	5.13282	4.42454	0.963007	4.7046	5.85657	0	51252	-
PLEKHO1	pleckstrin homology domain containing_ family O member 1	-2.13231	-1.09242	0.001494	0.023177	5.2681	2	2.09136	5.07559	3.43112	5.92291	7.04507	4.71425	5.60001	3.78678	6.80238	5.73922	6.51303	4.14676	6.62811	4.09783	6.63169	4.63538	6.32625	3.67302	6.20988	3.00686	4.13487	4.01498	4.49379	3.75591	4.35598	3.30337	4.32102	3.95974	3.07509	4.50606	51177	CKIP-1, CKIP1, JBP, OC120
RASA4B	RAS p21 protein activator 4B	-2.13115	-1.09163	1.13e-05	0.000547	6.5402	2	5.96405	5.50898	6.69704	3.57598	8.02117	4.34755	6.9702	6.25528	7.98346	5.42898	7.69588	5.77974	7.58549	4.82824	7.11976	5.80855	7.26816	6.34362	6.60225	6.07201	6.56811	5.99201	5.89023	6.32976	5.76987	6.04079	6.22979	6.54243	6.28077	6.28572	100271927	-
SPTLC3	serine palmitoyltransferase_ long chain base subunit 3	-2.12483	-1.08735	0.001565	0.02403	7.4206	1	5.4396	6.78229	5.72429	5.56142	8.16658	6.27783	9.16375	6.2819	9.37653	6.90521	8.89653	8.06422	8.5585	7.11736	8.70233	7.728	8.06433	5.72414	8.13338	6.32515	5.63225	6.17431	5.77677	5.85595	5.13282	6.14186	5.62696	5.48153	5.6936	5.8889	55304	C20ORF38, LCB2B, LCB3, SPT3, SPTLC2L, DJ718P11, DJ718P11.1, HLCB2B
GNB4	guanine nucleotide binding protein (G protein)_ beta polypeptide 4	-2.12458	-1.08718	1.54e-09	4.53e-07	8.2513	1	8.1508	7.36288	8.2818	7.43	8.84853	7.11929	9.27418	7.98977	9.50161	7.9125	9.41367	8.05188	9.21744	7.82474	9.24082	7.93146	8.61422	7.1713	8.71291	7.36827	8.11443	7.3623	7.88835	7.28071	7.86887	7.35253	7.6189	7.47689	7.98602	7.64713	59345	CMTD1F
FA2H	fatty acid 2-hydroxylase	-2.12436	-1.08703	0.000428	0.008722	6.394	2	5.22574	6.68369	5.92353	6.50661	7.28791	5.34193	7.79614	4.77161	7.97053	6.55491	6.99594	6.69431	6.97078	6.23197	7.72153	5.85503	7.33096	5.66638	7.17866	3.79735	6.22888	3.44514	6.27151	3.88367	5.35506	4.51345	5.0971	5.25581	6.05764	4.15265	79152	FAAH, FAH1, FAXDC1, SCS7, SPG35
TRIM36	tripartite motif containing 36	-2.11706	-1.08206	5.2e-06	0.000305	3.9573	2	3.56945	4.62247	4.21841	2.78303	4.557	3.6762	5.09285	1.94292	4.9933	4.28219	4.22588	3.63174	4.32474	3.61892	4.7291	3.21054	5.07736	2.7075	5.24307	2.77928	4.04119	2.92493	4.2435	2.85893	4.21179	3.57527	3.83705	3.62342	3.44668	2.56973	55521	HAPRIN, RBCC728, RNF98
DUSP6	dual specificity phosphatase 6	-2.11643	-1.08163	2.6e-06	0.000176	10.3212	1	9.60724	9.61562	9.49439	9.00938	11.2269	9.61115	11.7166	9.6317	11.7538	10.3528	11.3131	9.79371	11.2519	9.42758	11.392	9.7307	11.0152	9.36175	11.1598	9.64988	9.81922	9.54717	9.56462	9.36961	9.36702	9.46492	9.4931	9.74007	9.55299	9.69769	1848	HH19, MKP3, PYST1
NT5M	5'_3'-nucleotidase_ mitochondrial	-2.11503	-1.08068	0.001642	0.024705	3.3125	2	2.41918	2.88019	4.72488	2.3791	4.70286	2.38082	4.20955	1.27645	4.41393	2.44084	4.22588	3.63174	4.50835	3.30267	4.69306	2.89183	2.26592	3.41694	3.73236	0	4.30575	2.30936	2.45561	0.700864	2.77469	2.83639	0.963007	3.95974	3.27282	2.30731	56953	DNT-2, DNT2, MDN
EVA1C	eva-1 homolog C (C. elegans)	-2.11475	-1.08049	0.002245	0.031241	6.878	2	5.3463	6.46364	5.58418	7.23453	8.52803	6.522	7.788	4.65427	8.56795	6.86922	8.05896	6.40201	8.2297	7.16676	8.22597	6.99556	7.67549	4.94175	7.79594	4.0223	5.49765	4.54972	5.16939	4.86525	5.45454	5.36689	4.68277	5.19339	5.15629	3.88982	59271	B18, B19, C21ORF63, C21ORF64, FAM176C, PRED34, SUE21
GRAMD1A	GRAM domain containing 1A	-2.11332	-1.07951	1.58e-05	0.000701	6.3742	2	5.83261	6.14949	6.68337	6.47969	7.2249	6.61164	7.09417	5.4949	7.43728	6.30845	6.79199	5.44437	7.17465	5.50262	7.15331	5.16442	7.18751	6.57049	7.60019	4.07346	6.48159	3.52994	6.39967	5.14573	6.15218	4.42454	5.45027	5.98375	6.55217	4.84032	57655	KIAA1533
NES	nestin	-2.1119	-1.07854	0.000392	0.00814	7.4178	1	6.67393	6.23901	6.25463	5.56142	8.22812	5.58897	7.13965	7.93631	8.66742	6.55491	6.74512	5.93111	8.20332	3.95516	8.09743	4.46605	8.85164	6.39194	9.24523	7.02272	8.49174	6.58434	7.0636	6.94214	6.74353	6.71062	6.9917	7.36808	6.88997	7.85215	10763	NBLA00170
CCL5	chemokine (C-C motif) ligand 5	-2.109	-1.07656	0.000271	0.006121	4.8004	2	3.97055	4.51186	5.69734	2.78303	6.64875	2.38082	4.89491	3.71046	4.60448	3.40564	5.66087	1.71329	5.64263	2.54517	5.07554	3.05997	5.72276	5.45523	4.93746	4.57736	4.89325	5.24521	3.94049	4.10956	5.21077	4.85707	4.92744	4.56367	5.62288	3.68356	6352	D17S136E, RANTES, SCYA5, SIS-DELTA, SISD, TCP228, EOCP
WDR54	WD repeat domain 54	-2.10846	-1.07619	9.52e-10	3.03e-07	6.2415	2	6.60309	5.11396	7.06708	5.70779	6.75293	5.21691	5.65473	6.15805	6.46414	5.21626	6.41162	5.07326	6.79642	4.40281	6.49183	4.7869	6.27039	5.6466	6.27867	6.09695	7.08484	5.45494	7.48078	6.2371	6.57693	5.76111	6.7459	5.6303	7.08673	6.15188	84058	-
GJC2	gap junction protein_ gamma 2_ 47kDa	-2.10421	-1.07328	0.001884	0.027302	1.5855	2	2.09136	2.21279	1.97668	0.880037	3.22464	0.881014	1.16998	1.27645	1.70374	2.44084	1.4705	2.01392	2.13744	0	2.48048	2.22335	2.663	1.25276	1.29041	0	2.43779	1.21342	3.18171	0.700864	1.55962	1.24181	3.10349	1.77678	3.07509	0.99088	57165	CX46.6, CX47, GJA12, HLD2, LMPH1C, PMLDAR, SPG44
TGFB1I1	transforming growth factor beta 1 induced transcript 1	-2.10255	-1.07214	1.96e-06	0.000142	7.3692	1	7.05626	6.33959	7.24515	5.96234	8.49837	6.62401	7.81227	7.41166	8.38196	6.78481	7.85885	5.13694	8.33977	4.74395	7.93718	5.37042	7.99708	7.07099	8.50469	6.64559	7.73518	6.85477	7.31187	7.24546	6.99554	6.77497	7.48004	7.4167	7.0195	7.22023	7041	ARA55, HIC-5, HIC5, TSC-5
GDPD5	glycerophosphodiester phosphodiesterase domain containing 5	-2.10235	-1.072	0.002762	0.03657	1.9467	2	1.66645	0.932761	3.55641	1.81609	0.875615	1.81763	0.700477	2.18778	3.09167	1.98297	1.87057	0.815325	1.60402	1.3853	1.20715	0	3.72146	2.36426	2.20631	1.1197	3.5904	2.10339	3.31772	2.2488	3.28761	0.750588	3.25464	2.08253	1.79735	0.99088	81544	GDE2, PP1665
XKR9	XK_ Kell blood group complex subunit-related family_ member 9	-2.08927	-1.063	3.31e-07	3.29e-05	4.0382	2	3.75514	3.77873	5.21758	2.78303	3.84365	3.57794	4.59255	3.85927	4.92347	2.78787	4.68911	2.82325	4.81755	3.30267	4.57919	4.27417	4.3254	3.41694	4.59309	3.29243	3.12626	4.12812	4.84849	2.97824	4.66375	3.20002	4.25081	4.29308	4.88126	2.30731	389668	XRG9
CACNA1B	calcium channel_ voltage-dependent_ N type_ alpha 1B subunit	-2.08903	-1.06283	0.001038	0.017507	6.3617	2	5.96405	6.43361	6.58385	4.56629	7.86979	6.05854	7.39134	2.74194	7.83447	5.89052	6.82617	6.59576	7.68418	6.40663	6.21516	6.95347	5.74343	5.5	6.97816	1.46442	6.35104	4.01498	6.86697	4.7015	5.35506	4.89065	5.68135	5.88847	6.62635	4.2306	774	BIII, CACNL1A5, CACNN, CAV2.2, DYT23
CDC25B	cell division cycle 25B	-2.08849	-1.06246	1.99e-06	0.000143	8.1515	1	8.083	7.88516	7.36989	7.74461	9.09086	8.10088	9.08125	8.20325	9.02087	8.26041	8.71081	7.45721	9.21909	6.91058	8.991	7.01616	8.95049	6.1605	9.47072	7.0162	7.91759	6.5744	7.50948	6.85128	8.01725	7.18671	7.93657	7.57195	7.46583	7.52869	994	-
PHLDA2	pleckstrin homology-like domain_ family A_ member 2	-2.08842	-1.06241	1.4e-07	1.64e-05	10.6404	1	10.5483	9.64703	10.5964	9.41308	12.2929	9.64491	11.3622	10.3257	11.5232	9.97091	11.6253	9.72284	11.5165	9.55982	11.5299	9.8416	10.9954	9.89555	11.1725	10.0097	10.6912	10.1479	10.2336	9.89724	10.0546	10.2574	9.3556	10.7262	10.2339	9.99574	7262	BRW1C, BWR1C, HLDA2, IPL, TSSC3
ITGA5	integrin_ alpha 5 (fibronectin receptor_ alpha polypeptide)	-2.08739	-1.0617	0.00013	0.00349	7.6812	1	7.78534	6.9186	7.46085	6.43834	7.59247	6.97231	6.43681	6.70218	8.71211	8.14098	7.13877	4.61768	8.26521	4.28843	7.5356	5.27109	8.86113	7.27799	9.23661	6.89346	8.18183	6.44933	8.30732	7.789	7.98434	7.00701	8.47599	6.8257	8.11401	8.06923	3678	CD49E, FNRA, VLA-5, VLA5A
OSMR-AS1	OSMR antisense RNA 1 (head to head)	-2.08719	-1.06156	0.001619	0.024515	2.2014	2	1.06154	1.89793	3.67168	3.09825	3.34805	0	2.97736	2.57978	3.09167	0	2.84783	2.01392	1.60402	2.89705	3.67573	1.90778	3.22977	1.91301	2.41628	0	3.12626	1.21342	2.67413	1.80814	3.28761	1.24181	2.26227	2.08253	1.79735	1.57279	101929768	CTD-2127H9.1
DHCR7	7-dehydrocholesterol reductase	-2.08435	-1.0596	6.11e-05	0.001941	11.4538	1	10.8209	11.3466	10.3461	11.065	12.4374	11.1319	12.7092	10.741	12.8027	11.1683	12.4318	11.2734	12.6769	10.7068	12.7265	10.3666	12.0966	10.1503	12.5965	10.426	10.5162	10.2823	10.212	10.4546	10.4477	10.4722	10.1382	10.175	10.1795	10.7433	1717	SLOS
KLF12	Kruppel-like factor 12	-2.0803	-1.05679	0.002197	0.03073	4.7471	2	3.81209	4.77394	4.42969	4.56629	5.36001	4.80392	6.3838	2.39705	6.13398	5.06538	5.38327	5.00663	5.82673	3.95516	5.62719	4.58111	6.18231	4.13714	6.23779	1.74245	3.12626	2.92493	4.75572	2.42716	2.77469	2.6915	2.26227	3.62342	3.44668	3.15367	11278	AP-2REP, AP2REP, HSPC122
CKMT1A	creatine kinase_ mitochondrial 1A	-2.07602	-1.05382	2.05e-05	0.000851	6.8054	2	6.20633	6.73383	6.56906	6.49321	8.33268	6.02163	7.91299	6.00669	7.7613	5.83562	7.96493	7.04076	7.70313	6.64607	7.67147	6.97467	7.0366	5.45523	7.20718	5.20073	7.08484	4.96966	6.51737	5.85595	6.42169	4.92346	5.48126	6.22125	6.25761	5.50566	548596	CKMT1
CDC20	cell division cycle 20	-2.07378	-1.05226	1.82e-10	6.99e-08	8.3529	1	8.65748	7.78764	8.76331	8.27349	9.62396	7.96656	8.94518	7.98977	8.85494	8.21453	9.14694	7.85765	9.37939	7.72932	9.08091	7.64447	8.75063	7.50913	8.89483	6.94931	8.19276	7.50005	8.41362	6.98551	8.37133	7.55981	7.54014	7.34673	8.07481	7.72998	991	CDC20A, BA276H19.3, P55CDC
FAM46C	family with sequence similarity 46_ member C	-2.06901	-1.04894	0.001641	0.024705	3.2599	2	2.09136	3.67988	4.82789	1.42269	3.75722	2.59694	2.728	1.64783	4.73251	2.44084	3.53942	2.65944	4.05651	2.07879	2.91533	3.05997	4.52956	4.01905	4.01638	2.17602	4.04119	1.21342	4.17351	1.80814	4.05156	3.73168	0	3.18408	3.44668	0.99088	54855	-
HABP4	hyaluronan binding protein 4	-2.06571	-1.04664	7.07e-05	0.002196	5.791	2	4.54145	5.59288	4.87676	4.84468	7.2087	5.42906	7.30274	4.88012	7.28551	5.81685	6.30254	5.8191	6.84842	4.82824	6.67853	5.40207	6.1671	4.19275	6.64457	4.42813	5.75535	4.93897	4.75572	4.66639	5.38899	4.89065	4.5132	5.22494	4.94062	5.15214	22927	IHABP-4, IHABP4, KI-1/57, SERBP1L
NKAIN1	Na+/K+ transporting ATPase interacting 1	-2.06321	-1.04489	0.000786	0.014061	3.8605	2	1.66645	4.04017	3.67168	2.78303	5.74394	3.93625	4.80099	2.18778	5.15438	3.83681	4.73781	4.01738	5.01249	3.87816	4.57919	4.13043	4.02135	3.1054	4.83155	1.1197	3.83333	2.64973	3.66245	3.19081	3.28761	2.14156	2.93463	2.33467	3.7419	2.56973	79570	FAM77C
FHL2	four and a half LIM domains 2	-2.06149	-1.04369	0.000312	0.006816	7.7446	1	6.72671	7.75766	6.80199	7.50534	9.27709	7.70661	8.20038	6.43204	8.96982	7.98996	8.89115	7.46963	8.76426	7.43217	8.62074	7.81286	8.74551	6.2286	8.76897	5.94041	7.38093	4.70369	7.47352	6.42735	6.71707	6.1137	6.68064	5.76515	6.93445	6.53649	2274	AAG11, DRAL, FHL-2, SLIM-3, SLIM3
NEDD9	neural precursor cell expressed_ developmentally down-regulated 9	-2.05922	-1.0421	1.64e-05	0.000718	4.8299	2	4.15794	4.56822	4.67047	4.51418	4.557	4.406	4.55468	4.69445	6.0215	4.43772	5.60946	3.22599	5.80934	2.54517	5.48687	3.05997	6.48193	4.48774	5.89632	4.07346	5.13916	3.52994	4.2435	3.88367	4.77056	4.89065	5.31919	4.61219	4.61589	4.62629	4739	CAS-L, CAS2, CASL, CASS2, HEF1
LOC729080	glycine cleavage system protein H (aminomethyl carrier) pseudogene	-2.05828	-1.04144	0.002982	0.038811	1.9308	2	1.89449	2.47109	2.29704	0	2.94079	1.42403	2.42634	1.94292	3.32622	1.30832	2.84783	2.82325	2.34477	2.54517	3.67573	2.22335	2.663	0.758289	2.76212	1.1197	2.10889	0	1.48243	2.04523	2.96665	0	0	0.85509	3.27282	1.9863	729080	-
SMIM3	small integral membrane protein 3	-2.05804	-1.04127	2.39e-08	3.99e-06	7.7827	1	7.71243	6.98221	7.66941	6.21173	8.84853	6.92313	8.419	7.14791	8.70433	6.85089	9.03448	6.88256	8.63698	7.15865	8.4824	7.4538	8.6086	7.5146	8.31466	7.64683	7.46451	7.47353	6.88897	7.59729	7.51662	7.12457	7.58363	6.32678	7.75752	7.10078	85027	C5ORF62, MST150, NID67
PTAFR	platelet-activating factor receptor	-2.05307	-1.03778	0.00045	0.009073	7.0261	2	5.96405	6.97181	6.11901	7.29755	8.35492	6.76465	7.72972	5.70617	8.06679	6.76536	7.94951	6.33571	8.16282	6.72515	8.26024	6.84251	8.17876	6.40377	8.47861	5.28995	5.53249	5.36547	6.82192	6.20076	5.45454	5.45931	5.57043	5.19339	5.62288	5.3397	5724	PAFR
DMKN	dermokine	-2.05019	-1.03576	0.000499	0.009809	13.2788	1	11.7071	13.3043	11.6667	11.8237	14.5861	13.2481	14.3602	12.4978	14.8908	13.0139	14.274	13.646	14.5825	12.6175	14.3815	13.0169	13.7675	11.6306	14.33	11.7632	12.5775	11.9849	11.843	12.009	11.6683	11.7061	12.1037	12.0742	12.691	11.9359	93099	UNQ729, ZD52F10
TREX2	three prime repair exonuclease 2	-2.05012	-1.03571	0.000924	0.015908	5.9493	2	5.0236	6.47842	4.72488	4.75772	7.54812	5.56352	6.94114	4.28477	7.74114	6.07561	6.87052	5.85741	7.20821	6.10255	6.24035	5.57862	6.70904	4.65546	6.69578	3.45558	5.89579	4.28275	4.97733	3.46043	4.71814	4.46968	4.68277	5.48153	4.94062	4.30455	11219	-
IMPDH1	IMP (inosine 5'-monophosphate) dehydrogenase 1	-2.04446	-1.03172	3.28e-09	7.98e-07	9.2101	1	9.20517	8.63075	8.84847	8.47093	10.4112	9.02789	10.0152	9.10529	10.1048	9.12322	9.70908	8.59023	10.1761	8.2973	10.0371	7.9151	9.63606	8.24402	10.1098	8.03985	9.37443	8.07356	8.91777	8.37451	8.78846	8.82924	8.95309	8.54959	8.89589	8.71984	3614	IMPD, IMPD1, IMPDH-I, LCA11, RP10, SWSS2608
EN2	engrailed homeobox 2	-2.04436	-1.03165	0.003396	0.042976	2.2929	2	1.39547	0.932761	3.67168	1.81609	2.58706	2.95109	3.08755	0	2.25169	2.62477	3.53942	0.815325	2.526	2.54517	1.85504	0	2.97404	2.98456	3.27439	2.35207	4.04119	1.86304	2.19798	0.700864	3.13604	1.24181	0.963007	2.54923	3.86957	0.99088	2020	-
AATK	apoptosis-associated tyrosine kinase	-2.04241	-1.03027	0.000361	0.007646	5.3434	2	5.51013	3.33475	5.46138	1.81609	5.85214	3.47249	6.67605	5.66632	6.13398	4.16833	4.87475	3.22599	5.95877	2.54517	5.78961	2.48213	5.86157	5.06608	5.99774	5.15397	4.9459	4.87557	5.43173	5.22024	5.86936	5.56708	6.26584	5.12815	5.88707	5.86466	9625	AATYK, AATYK1, LMR1, LMTK1, PPP1R77, P35BP
PLEKHA4	pleckstrin homology domain containing_ family A (phosphoinositide binding specific) member 4	-2.03912	-1.02795	1.76e-05	0.000759	7.5736	1	6.58687	7.8458	7.36133	7.70449	8.51493	6.95284	7.4544	6.56803	8.70172	7.85846	8.11072	6.77658	8.66867	6.13601	8.46113	6.61837	8.7013	7.2055	9.0544	6.30389	7.11963	6.2133	7.14815	6.53831	7.16176	6.49833	7.38491	6.71897	6.9917	6.06944	57664	PEPP1
TGIF2	TGFB-induced factor homeobox 2	-2.03605	-1.02577	0.001858	0.027035	4.7921	2	4.20121	4.86674	5.09901	4.51418	5.76624	5.00638	5.54313	1.94292	5.61938	5.29975	5.58305	3.33861	5.49817	3.95516	5.90439	4.7869	5.4485	5.31191	5.34924	1.74245	4.89325	2.64973	6.13085	2.85893	4.28568	3.0887	1.94415	4.16883	4.99763	0.99088	60436	-
TNFRSF13C	tumor necrosis factor receptor superfamily_ member 13C	-2.03493	-1.02498	0.000829	0.014646	2.3866	2	2.8031	1.4946	2.55903	1.81609	1.41661	2.95109	4.51579	0.775017	3.2137	1.68473	2.84783	2.47461	2.34477	1.3853	3.59989	2.22335	2.26592	2.7075	2.20631	1.1197	2.93115	2.30936	2.86387	1.80814	2.55322	2.83639	3.39145	2.33467	3.44668	0.99088	115650	BAFF-R, BAFFR, BROMIX, CD268, CVID4, PROLIXIN
C21orf67	long intergenic non-protein coding RNA 1547	-2.03092	-1.02213	0.001179	0.019173	2.9991	2	1.39547	2.88019	1.97668	3.3568	4.50491	2.12654	3.18991	1.27645	4.13378	2.62477	4.63871	3.22599	3.99632	2.33074	3.94456	3.05997	4.2695	3.1054	3.88135	2.77928	2.43779	2.92493	3.03152	2.04523	1.55962	1.24181	3.5164	1.38832	2.84589	1.57279	84536	C21ORF67, C21ORF69, PRED54, LINC01547
IFI6	interferon_ alpha-inducible protein 6	-2.02755	-1.01974	0.000519	0.010103	11.8547	1	12.3716	13.1774	11.5669	11.5174	13.1918	11.6647	11.4742	9.71219	11.1753	10.3149	12.6149	9.6263	12.6724	11.829	12.3331	11.8991	12.5861	9.85519	12.5185	10.9829	10.7113	10.7255	11.4199	10.1524	12.8366	10.4736	12.6043	9.41206	12.5364	9.4994	2537	6-16, FAM14C, G1P3, IFI-6-16, IFI616
CEP112	centrosomal protein 112kDa	-2.02678	-1.01919	3.4e-05	0.001252	4.7033	2	4.24323	2.21279	4.82789	3.76621	5.20539	3.76819	5.03901	3.92829	5.45587	4.0447	6.07509	3.79855	5.21094	3.0453	5.60796	3.05997	5.68052	5.18053	6.0925	4.26167	5.13916	4.28275	5.05725	4.66639	3.96424	4.27999	3.92984	4.46144	3.98685	4.73727	201134	CCDC46, MACOCO
GRB10	growth factor receptor-bound protein 10	-2.02428	-1.01741	1.17e-07	1.43e-05	7.1862	1	7.39595	6.43361	7.22642	5.68441	7.46875	6.41222	7.84009	7.38121	8.05867	7.02454	7.60692	5.77974	7.241	5.73872	7.62918	6.00682	7.72828	6.01383	8.04531	6.4072	7.99459	5.73052	6.57281	6.42735	7.74336	6.7293	7.94215	6.90574	7.22447	7.78268	2887	GRB-IR, GRB-10, IRBP, MEG1, RSS
FAM101B	family with sequence similarity 101_ member B	-2.02424	-1.01738	7.25e-07	6.28e-05	6.198	2	5.9387	5.25799	6.1787	5.14801	7.23292	5.04367	6.61296	5.94141	7.38628	6.44918	6.39653	5.19793	6.94712	4.65443	7.00684	5.20086	6.74022	5.58559	7.47094	5.73334	6.85638	5.45494	5.30651	5.38045	5.84512	6.04079	5.38622	6.14084	6.39128	5.53668	359845	CFM1
DCBLD1	discoidin_ CUB and LCCL domain containing 1	-2.02382	-1.01708	5.75e-05	0.001848	8.0294	1	7.44178	7.38658	7.2819	7.4016	7.80664	7.92719	9.48769	7.35638	9.55454	7.97734	8.72295	6.92827	9.08823	6.77909	8.88116	6.75943	9.19889	7.19191	9.21044	7.2565	7.2085	7.10332	7.1842	7.51581	7.36293	7.4288	7.53276	6.8257	6.43321	7.99858	285761	DJ94G16.1
CEBPA-AS1	CEBPA antisense RNA 1 (head to head)	-2.01338	-1.00962	0.000884	0.015401	3.2373	2	4.3624	1.89793	3.43112	2.12489	2.77474	0	2.58504	3.92829	3.52791	2.78787	3.30099	3.10382	3.72676	2.07879	3.24903	0.939183	3.63562	2.98456	2.90822	2.35207	3.12626	2.10339	4.707	3.37604	5.24822	2.96805	3.39145	3.62342	4.29046	2.984	80054	-
KLC3	kinesin light chain 3	-2.00828	-1.00596	6.35e-06	0.000353	9.5165	1	9.1524	8.72673	9.05369	7.53179	11.0181	8.48328	10.2606	9.43525	10.753	9.10593	10.4359	8.49015	10.4593	8.15767	10.2857	8.33549	9.87955	8.7952	10.2696	8.95935	9.21732	9.1281	8.62506	9.40198	8.80426	9.06074	8.85298	8.89913	9.38953	9.4915	147700	KLC2, KLC2L, KLCT, KNS2B
WDR66	WD repeat domain 66	-2.0075	-1.0054	7.55e-07	6.5e-05	8.8	1	8.18623	8.33025	8.63778	8.14232	9.93572	8.1909	9.17315	7.97353	9.66163	8.05548	10.1389	8.29808	9.65963	8.65844	9.6615	9.24875	9.67423	8.08779	9.44251	7.71688	8.44678	8.1692	8.61849	7.74761	8.43361	7.86445	7.91403	7.57195	8.67775	7.63285	144406	CAM-IP4
GPRC5B	G protein-coupled receptor_ class C_ group 5_ member B	-2.00721	-1.00519	0.000119	0.003263	5.7097	2	4.24323	5.38893	5.852	5.45488	5.6749	5.45697	6.50789	4.23114	6.22387	6.16738	6.56792	4.14676	7.17465	4.34675	7.07844	4.20409	7.0366	5.45523	6.69578	5.24603	5.59976	4.90762	5.16939	5.09383	4.71814	4.92346	5.54132	4.03286	4.68695	5.47396	51704	RAIG-2, RAIG2
LOC283335	uncharacterized LOC283335	-2.00683	-1.00492	0.000767	0.013803	2.8967	2	3.10604	2.47109	4.42969	2.12489	4.14534	1.42403	3.08755	1.64783	3.52791	1.68473	2.84783	0.815325	3.72676	0.852901	2.48048	1.90778	2.663	3.74918	3.27439	2.17602	3.941	2.48956	3.66245	3.68752	3.96424	2.96805	3.39145	3.30708	2.57328	1.57279	283335	-
DNM1	dynamin 1	-2.00591	-1.00426	0.00025	0.005747	5.9834	2	4.70071	5.32495	5.66987	3.67422	5.52603	3.85466	6.93379	5.83758	7.14684	5.69878	7.04514	6.14755	6.79642	3.61892	7.4838	4.68767	6.99412	5.20778	7.07417	5.00383	5.49765	5.19415	5.20491	5.33647	5.21077	5.41384	6.31827	5.96519	5.42924	6.28572	1759	DNM, EIEE31
MARVELD1	MARVEL domain containing 1	-2.00555	-1.004	1.54e-07	1.74e-05	8.3426	1	8.58377	8.05748	7.92315	7.93004	9.00205	8.15301	8.60419	8.0217	9.58455	8.47915	8.6228	7.01556	9.13435	6.94874	9.22986	6.98515	8.98994	7.44187	9.42289	7.69663	7.99459	7.33309	8.02877	7.5738	8.44977	7.99754	8.5102	6.49147	8.26097	8.29464	83742	GB14, MARVD1, MRVLDC1, BA548K23.8
CPNE5	copine V	-2.00193	-1.00139	0.004002	0.04849	2.4585	2	1.39547	1.4946	4.05814	1.42269	3.46172	2.78486	3.08755	1.27645	3.93519	1.30832	3.83632	2.47461	1.89525	2.89705	3.67573	3.69229	2.26592	2.7075	2.59954	0.665856	3.45164	0.730693	3.03152	0.700864	2.55322	1.24181	0.963007	2.33467	2.84589	1.57279	57699	COPN5, CPN5
HSD17B1	hydroxysteroid (17-beta) dehydrogenase 1	-1.99894	-0.999233	3.54e-06	0.000227	9.224	1	8.7405	8.77841	8.86976	8.77762	10.7942	8.34074	9.44434	8.4314	10.2642	8.79668	10.4741	8.71545	10.1701	8.64107	10.1209	9.49424	10.0531	8.49691	9.66439	8.45352	8.40037	8.3752	8.53023	8.44352	8.83842	8.4131	8.54729	7.99427	8.80298	8.24386	3292	EDH17B2, EDHB17, HSD17, SDR28C1
NT5E	5'-nucleotidase_ ecto (CD73)	-1.99273	-0.994748	3.69e-05	0.001334	7.4038	1	8.41712	5.93048	8.42424	5.70779	7.70641	6.64842	6.92639	7.17657	6.59343	5.87245	6.95533	5.8191	7.38294	5.88365	7.20541	5.65941	7.11799	7.0181	7.48265	7.71285	7.89769	7.01781	7.31999	6.89743	8.9219	7.18671	8.70657	6.99077	8.19547	7.66829	4907	CALJA, CD73, E5NT, NT, NT5, NTE, EN, ENT
FGF1	fibroblast growth factor 1 (acidic)	-1.99263	-0.994674	3.18e-05	0.001188	6.4728	2	6.2482	6.01402	6.58385	4.88628	8.00251	5.08002	7.36969	6.43204	7.44353	4.86067	7.40312	4.86338	7.38294	4.86861	7.13327	5.37042	7.39766	5.91809	6.76454	6.39719	6.20748	6.25126	5.75297	6.20076	6.24772	6.49833	5.21241	5.92734	5.88707	6.39131	2246	AFGF, ECGF, ECGF-BETA, ECGFA, ECGFB, FGF-1, FGF-ALPHA, FGFA, GLIO703, HBGF-1, HBGF1
PHLPP2	PH domain and leucine rich repeat protein phosphatase 2	-1.99003	-0.99279	0.000193	0.004748	4.4928	2	3.97055	4.62247	5.64187	4.15449	4.00236	4.406	5.60001	2.8877	4.55915	4.96665	4.83053	2.82325	4.67122	3.0453	4.22256	2.70147	5.20204	4.90892	5.99774	2.77928	5.66402	3.15595	4.707	3.46043	4.48707	3.87279	3.73788	4.56367	5.15629	3.44281	23035	PHLPPL
HLA-G	major histocompatibility complex_ class I_ G	-1.98909	-0.992105	2.98e-07	3.05e-05	5.5077	2	5.88663	5.6198	5.13962	5.1134	6.26615	5.11548	5.01132	4.98103	6.05454	5.29975	5.87193	4.93678	5.98997	4.28843	5.35468	5.2364	6.07227	5.00525	5.29713	4.26167	6.24998	4.28275	7.23663	5.171	5.13282	4.46968	6.31827	4.79144	5.6936	4.78971	3135	MHC-G
PCYT2	phosphate cytidylyltransferase 2_ ethanolamine	-1.98355	-0.988088	5.45e-06	0.000314	9.2816	1	8.81203	8.7143	8.93755	8.95422	10.7779	8.67075	10.1789	8.32022	10.3449	8.87363	10.3415	8.88035	10.3235	8.62643	10.358	8.77984	9.6402	8.59562	9.96603	8.46314	8.46944	8.71789	8.68289	8.58183	8.46576	8.61493	8.34733	8.59556	8.32363	8.44936	5833	ET
HOXA11	homeobox A11	-1.98326	-0.987873	0.00048	0.009531	2.6804	2	3.27759	0.932761	4.05814	3.3568	3.46172	1.42403	3.08755	2.74194	3.86242	1.68473	3.30099	0.815325	2.34477	0.852901	2.64044	1.50329	3.34243	3.1054	3.88135	2.65044	3.5904	2.48956	2.67413	3.19081	2.29147	1.89914	3.5164	2.73598	2.57328	1.9863	3207	HOX1, HOX1I
FLNA	filamin A_ alpha	-1.98167	-0.986719	0.0006	0.011315	11.962	1	11.3208	11.6732	10.6545	11.5845	12.9822	11.9617	12.6755	11.6992	13.0981	12.1587	12.1214	10.3274	13.1316	9.53338	12.8613	9.48133	13.1979	10.6153	13.6552	11.0147	11.3455	10.7456	10.4489	11.358	11.1361	11.4162	11.6762	10.8889	10.6296	12.0675	2316	ABP-280, ABPX, CSBS, CVD1, FLN, FLN-A, FLN1, FMD, MNS, NHBP, OPD, OPD1, OPD2, XLVD, XMVD
CHRNA9	cholinergic receptor_ nicotinic_ alpha 9 (neuronal)	-1.98056	-0.985907	0.000805	0.014287	5.621	2	3.50183	5.59288	4.96981	3.3568	6.90135	4.01347	7.36969	4.94817	7.40562	4.62202	6.33456	5.89473	6.24405	4.98335	6.32522	5.12703	5.74343	4.73253	5.62761	4.77573	6.46365	4.54972	4.80285	4.39337	4.35598	4.67634	4.38796	5.84852	4.94062	5.44155	55584	HSA243342, NACHRA9
NPR2	natriuretic peptide receptor 2	-1.97541	-0.982153	0.001492	0.023152	6.2037	2	4.50737	6.59152	5.13962	3.47055	7.61722	5.53761	7.93894	5.24728	7.81049	6.76536	6.76875	5.25645	7.38294	5.22017	6.06813	5.30497	7.33096	4.73253	6.31842	4.67995	5.26881	5.08627	4.84849	5.12001	5.17232	4.85707	6.48045	5.94639	4.99763	6.33948	4882	AMDM, ANPRB, ANPB, ECDM, GUC2B, GUCY2B, NPRB, NPRBI, SNSK
ARHGEF25	Rho guanine nucleotide exchange factor (GEF) 25	-1.97315	-0.980503	0.001044	0.017606	3.412	2	3.27759	2.88019	2.55903	3.67422	3.75722	3.76819	3.53925	1.64783	4.07057	3.97868	2.18345	1.33307	4.95039	1.3853	4.49795	3.58608	4.15075	2.36426	4.40896	3.29243	3.29811	1.57449	4.43517	3.54017	3.55001	1.24181	4.45194	2.73598	3.7419	2.984	115557	GEFT, P63RHOGEF
BUB1	BUB1 mitotic checkpoint serine/threonine kinase	-1.97313	-0.980487	5.3e-17	3.7e-13	6.6817	2	7.40523	6.16784	7.40363	6.32192	7.08996	6.59917	6.93379	6.47881	6.76294	6.49713	7.34929	5.79955	7.26032	6.42027	7.26187	5.92205	6.91435	6.17438	6.95313	5.6346	6.92355	6.00688	6.87801	5.7593	7.53188	6.04079	6.55517	5.67666	6.9917	5.81491	699	BUB1A, BUB1L, HBUB1
SLC25A35	solute carrier family 25_ member 35	-1.97202	-0.979677	0.001123	0.018539	3.7762	2	2.09136	3.57375	3.77843	2.59515	4.07562	2.95109	5.29011	2.74194	5.09209	2.44084	4.35636	4.01738	4.55083	3.30267	4.36682	1.90778	4.02135	4.61532	5.12848	2.35207	3.12626	1.57449	4.09994	3.61572	4.48707	2.14156	4.25081	4.03286	2.23686	3.5682	399512	-
SNAI2	snail family zinc finger 2	-1.97063	-0.978657	2.22e-09	5.75e-07	7.8332	1	7.85474	7.28093	8.15381	7.0547	8.5856	7.50078	8.70702	7.67529	8.61578	7.63557	8.49406	6.26621	8.402	6.82084	8.57196	6.35288	8.53938	6.94711	8.44009	7.23419	8.39565	7.30329	7.45888	7.07524	7.42965	7.11749	7.83825	7.71766	7.36109	7.80196	6591	SLUG, SLUGH1, SNAIL2, WS2D
C10orf10	chromosome 10 open reading frame 10	-1.97038	-0.978477	5.14e-08	7.21e-06	8.9394	1	9.01969	8.1801	8.59826	8.5213	10.148	7.82914	8.36806	8.42544	9.7065	8.4581	8.93879	8.07645	9.6825	7.67913	9.03125	7.84775	10.0164	8.65622	10.2881	8.50566	8.96011	8.41477	8.56482	8.82208	8.53557	8.6324	9.26501	8.06134	9.42634	8.52478	11067	DEPP, FIG, FSEG
PLK1	polo-like kinase 1	-1.96937	-0.977736	4.41e-14	6.57e-11	7.8278	1	8.50177	7.22067	8.09822	7.512	8.61968	7.3377	8.67208	7.96534	8.30853	7.61399	8.0348	6.86386	8.54805	6.703	8.26945	6.65823	8.13251	7.39523	8.53312	7.08637	7.70495	7.33309	8.19256	6.96399	8.02266	7.50123	7.68028	6.8257	7.89892	7.17165	5347	PLK, STPK13
C14orf1	chromosome 14 open reading frame 1	-1.96786	-0.976625	0.001514	0.023416	10.0201	1	8.71833	9.72658	8.70699	9.67725	11.5669	9.70725	11.4457	8.43436	11.2724	9.34906	11.363	10.3761	11.0867	10.2808	11.3902	9.97384	10.1854	8.39982	10.54	8.71747	9.22799	8.64371	8.82665	8.52172	8.60578	8.59978	8.34312	8.87944	8.35124	8.41638	11161	ERG28, NET51
DIAPH3	diaphanous-related formin 3	-1.96775	-0.976547	1.55e-07	1.75e-05	5.8815	2	6.85419	4.72519	6.56906	5.30959	6.00998	5.28077	6.0169	5.76396	5.55156	5.69878	5.99723	4.66165	5.84391	5.08964	6.15018	4.63538	5.7018	5.66638	5.86086	5.43392	6.27076	5.29452	6.62619	4.25843	7.13202	5.99521	5.75928	5.6303	7.15097	5.15214	81624	AN, AUNA1, DIA2, DRF3, NSDAN, DIAP3, MDIA2
ELMO1	engulfment and cell motility 1	-1.96758	-0.97642	0.002067	0.029314	4.0526	2	2.8031	3.95818	4.49375	3.57598	5.33038	4.56834	4.98309	1.94292	5.02699	4.38772	4.68911	4.37518	5.21094	2.73181	4.76427	4.05281	5.01073	3.21689	4.93746	2.17602	4.72269	1.57449	4.02242	1.17054	3.55001	2.6915	1.53542	4.10244	3.60183	3.15367	9844	CED-12, CED12, ELMO-1
PSRC1	proline/serine-rich coiled-coil 1	-1.96581	-0.975124	3.93e-09	9.08e-07	6.569	2	6.53707	6.23901	6.32676	6.19528	7.85945	6.2934	7.35324	6.08436	7.19949	6.32182	7.36488	6.1932	7.49049	5.84371	7.24951	6.06729	7.09405	5.81554	7.30935	5.6346	6.11854	5.76592	6.63923	5.48489	6.71707	5.60803	6.15488	6.07312	5.9462	6.11125	84722	DDA3, FP3214
FLRT2	fibronectin leucine rich transmembrane protein 2	-1.96231	-0.972556	0.003551	0.044371	6.4027	2	4.15794	6.65795	5.17913	6.6463	7.04507	6.5739	7.36969	5.27404	7.63045	7.51847	7.25206	5.49385	7.61581	4.94611	7.59051	4.7869	7.74887	4.53154	7.83301	4.86554	5.89579	4.07266	6.01555	4.25843	4.77056	4.22839	5.73377	5.37308	4.81935	4.93649	23768	-
S100A2	S100 calcium binding protein A2	-1.96167	-0.972079	0.000165	0.004249	15.4293	1	15.7712	14.1352	16.3556	13.2303	16.7979	14.0047	15.1043	15.814	15.7843	13.2528	16.3087	12.5196	16.0289	13.1397	15.7089	13.5775	15.6793	15.3114	15.6855	15.2884	15.7767	15.6344	15.6014	15.3064	15.6362	15.4019	14.8715	15.3209	15.8009	15.0091	6273	CAN19, S100L
SLC16A1	solute carrier family 16 (monocarboxylate transporter)_ member 1	-1.95901	-0.970123	0.000646	0.012006	8.7776	1	8.66329	9.08164	7.91732	8.21349	9.89455	9.10047	9.74262	7.61376	10.136	9.28562	9.52711	8.63503	9.74442	8.51957	9.21405	8.47965	9.84052	6.68156	9.89112	6.90763	7.72014	6.90326	7.84397	6.67705	8.34132	6.8017	8.18739	7.25803	8.12044	7.53639	6566	HHF7, MCT, MCT1, MCT1D
KNSTRN	kinetochore-localized astrin/SPAG5 binding protein	-1.95598	-0.967892	5.35e-09	1.15e-06	6.175	2	6.3952	5.67217	6.37858	6.24408	6.92136	5.98376	6.61296	5.32613	7.0354	6.29495	6.99594	5.63286	6.85691	5.84371	7.09235	5.92205	6.85861	4.61532	6.20988	5.17754	6.27076	5.08627	6.09343	4.83395	6.73036	5.50338	5.7078	5.6993	6.05764	5.40839	90417	C15ORF23, HSD11, SKAP, TRAF4AF1
DNA2	DNA replication helicase/nuclease 2	-1.95456	-0.966841	0.001159	0.018938	6.258	2	5.83261	6.33959	6.13919	6.53303	6.37172	6.73076	8.04517	4.88012	6.86891	6.50888	6.8814	5.75965	6.93915	5.73872	6.92374	6.33659	7.56373	4.90892	7.57306	4.38828	4.9459	3.9549	4.93565	3.8212	6.22911	4.46968	5.59897	5.09439	5.9462	4.3749	1763	DNA2L, HDNA2
AURKB	aurora kinase B	-1.95376	-0.966251	4.05e-14	6.44e-11	7.5996	1	8.36336	7.013	8.48854	6.91097	8.09791	7.04767	7.41267	7.4649	7.31988	7.0569	7.76211	7.08985	7.88012	6.44718	7.69444	6.72231	7.75397	7.22563	7.93456	6.75147	8.46493	6.99562	8.18369	6.80361	8.35426	7.37643	7.54748	7.40297	8.28979	6.80204	9212	AIK2, AIM-1, AIM1, ARK2, AURB, IPL1, PPP1R48, STK12, STK5, AURKB-SV1, AURKB-SV2
LIMA1	LIM domain and actin binding 1	-1.95371	-0.966219	5.84e-10	1.99e-07	9.406	1	9.18779	8.82542	9.02958	9.01876	10.2063	8.90155	10.3668	8.93546	10.3925	9.2121	10.1824	8.59874	10.1111	8.99797	10.1676	8.73395	10.1911	8.73794	10.1042	8.67877	8.87443	8.55796	9.12436	8.89402	9.5203	8.90719	9.17546	8.15028	9.20516	8.96758	51474	EPLIN, SREBP3
SYNC	syncoilin_ intermediate filament protein	-1.95343	-0.966009	0.001392	0.02188	3.2699	2	3.43089	2.47109	3.2939	3.57598	3.84365	0.881014	4.62945	3.02008	4.55915	2.9344	4.35636	0.815325	3.72676	1.3853	4.61815	2.89183	3.44692	3.1054	4.59309	3.20338	3.12626	2.30936	2.19798	3.61572	3.66524	2.53041	2.52277	2.33467	1.79735	3.88982	81493	SYNC1, SYNCOILIN
CDH11	cadherin 11_ type 2_ OB-cadherin (osteoblast)	-1.9533	-0.965911	0.001933	0.027805	6.3096	2	4.50737	6.22155	6.80199	6.17863	6.88106	6.3088	7.10731	6.08436	7.45595	6.23964	7.37261	4.47712	7.58549	4.28843	7.19256	5.12703	7.95783	5.5	7.48847	4.61237	4.45852	5.47647	4.43517	5.26786	5.13282	5.41384	5.38622	4.46144	4.61589	6.68232	1009	CAD11, CDHOB, OB, OSF-4
PLCG2	phospholipase C_ gamma 2 (phosphatidylinositol-specific)	-1.95068	-0.963976	3.39e-06	0.00022	7.0812	1	6.49422	6.52188	6.99143	5.77576	7.79041	6.32403	8.13773	6.8429	8.31536	6.71555	8.15621	6.76655	8.08186	6.37895	7.93718	7.17114	7.74887	6.83798	7.67355	6.31456	6.89705	5.74832	6.50317	6.6682	6.13229	6.18309	6.56967	6.52986	6.64432	5.91274	5336	APLAID, FCAS3, PLC-IV, PLC-GAMMA-2
PRKAR2B	protein kinase_ cAMP-dependent_ regulatory_ type II_ beta	-1.94623	-0.960685	0.003411	0.043126	3.8009	2	3.63404	1.89793	4.05814	1.42269	3.56709	2.12654	4.80099	3.02008	3.52791	1.98297	4.15593	1.33307	3.57039	1.3853	4.83213	2.70147	5.01073	3.67302	4.71724	4.42813	5.84124	3.52994	4.60433	4.55564	3.13604	3.20002	3.25464	3.62342	2.57328	4.30455	5577	PRKAR2, RII-BETA
GPR37	G protein-coupled receptor 37 (endothelin receptor type B-like)	-1.94494	-0.959726	0.000302	0.006645	4.1969	2	4.3624	3.45919	4.72488	3.67422	4.21184	4.46216	5.09285	3.85927	5.15438	3.67945	4.22588	2.01392	4.63219	1.77332	4.89694	4.63538	5.68052	4.34777	4.45724	3.96926	4.83861	2.79388	5.33885	2.97824	2.77469	3.73168	4.09923	2.33467	3.44668	4.30455	2861	EDNRBL, PAELR, HET(B)R-LP
EIF5A2	eukaryotic translation initiation factor 5A2	-1.94455	-0.95944	5.27e-05	0.001738	4.2539	2	4.11332	4.45321	5.21758	3.57598	4.60728	4.61863	4.83298	3.14132	5.45587	3.83681	4.95931	3.22599	4.98178	3.17972	4.95896	3.58608	5.49798	4.13714	5.29713	3.29243	4.04119	4.23303	3.94049	2.2488	2.96665	3.73168	4.17701	3.71513	3.44668	3.88982	56648	EIF-5A2, EIF5AII
TM4SF19	transmembrane 4 L six family member 19	-1.94245	-0.957878	0.001635	0.024672	4.0319	2	4.01973	3.95818	1.97668	3.85267	4.74838	3.93625	4.98309	2.57978	5.68415	4.10784	4.58649	3.63174	4.85192	3.30267	4.45555	3.58608	5.54583	2.85267	5.39952	2.89755	3.45164	2.64973	2.86387	3.19081	3.77194	3.20002	4.32102	2.33467	1.16215	4.68285	116211	OCTM4
SPC24	SPC24_ NDC80 kinetochore complex component	-1.93587	-0.952982	2.21e-05	0.000899	4.4124	2	4.01973	4.32822	5.29154	4.01146	5.36001	4.28664	5.33549	3.02008	5.40553	4.70603	4.73781	4.08352	4.8855	4.28843	5.30778	3.47143	5.14105	4.34777	5.32342	3.9142	3.941	2.64973	3.44201	3.08844	4.1339	3.6556	4.97176	3.0496	3.98685	4.2306	147841	SPBC24
STARD4	StAR-related lipid transfer (START) domain containing 4	-1.9347	-0.952111	0.000218	0.005197	7.1675	1	6.37645	6.67088	6.1787	6.35192	7.68316	7.01987	8.93046	6.712	8.46418	7.09635	8.08742	6.88256	7.86757	6.87138	8.0412	6.81926	8.17496	6.36798	8.05319	6.15747	6.44548	5.78329	6.51737	5.87145	6.40521	5.45931	6.21143	6.54243	5.76101	6.87667	134429	-
FOXA2	forkhead box A2	-1.93388	-0.951495	0.000808	0.014312	5.1331	2	5.22574	4.19137	3.87781	1.81609	6.45645	4.406	6.18745	5.90762	5.29926	4.43772	5.18681	3.94806	5.79174	2.33074	5.52838	2.89183	5.07736	3.82153	5.74895	4.50467	5.59976	5.16792	5.13297	4.73577	5.51723	3.87279	6.19283	6.00207	5.58617	4.56743	3170	HNF3B, TCF3B
ACP5	acid phosphatase 5_ tartrate resistant	-1.9336	-0.951293	7.91e-05	0.002396	9.9979	1	9.33105	9.50085	9.18804	9.51934	11.2816	9.35344	10.362	9.50327	11.3671	9.55706	11.1507	9.90763	11.1442	9.50004	10.934	10.0154	10.653	9.11962	10.9731	8.91621	9.10605	9.30396	9.26353	9.45566	8.90148	9.15529	8.87064	8.41589	9.45969	8.97892	54	HPAP, SPENCDI, TRAP
RAC2	ras-related C3 botulinum toxin substrate 2 (rho family_ small GTP binding protein Rac2)	-1.93348	-0.9512	0.000212	0.005097	6.7865	2	6.82682	6.52188	6.13919	7.39441	7.81201	6.53515	7.17752	5.89043	7.10013	6.74564	6.58133	6.74628	7.41778	6.52501	6.7851	6.8654	7.75905	5.3368	8.13338	4.42813	6.77141	3.68592	7.7569	5.79225	6.15218	5.74284	6.95905	5.6303	7.2944	4.88921	5880	EN-7, GX, HSPC022, P21-RAC2
ALDH1B1	aldehyde dehydrogenase 1 family_ member B1	-1.93239	-0.950385	2.61e-07	2.72e-05	6.5117	2	6.8474	6.18597	6.91159	6.67031	7.37754	6.3688	7.10076	5.87303	7.27152	6.38691	7.20088	5.6106	7.75401	6.13601	7.55078	5.49305	6.80063	6.21524	6.74523	5.24603	5.84124	5.55951	6.30464	5.42314	6.11211	6.02576	5.75928	5.45517	6.81264	5.84	219	ALDH5, ALDHX
EMILIN1	elastin microfibril interfacer 1	-1.93183	-0.949965	0.000916	0.015833	2.6826	2	2.26456	0.932761	3.67168	1.42269	3.34805	2.78486	2.97736	1.27645	4.00447	1.98297	1.87057	1.71329	3.19528	2.07879	3.03535	2.70147	2.47808	3.59261	3.16235	1.74245	3.12626	2.10339	3.66245	2.42716	3.77194	2.6915	2.52277	3.30708	4.19618	1.57279	11117	EMI, EMILIN, GP115
NCF1C	neutrophil cytosolic factor 1C pseudogene	-1.93131	-0.949577	0.00164	0.024705	2.834	2	2.26456	3.19855	3.55641	2.12489	4.50491	2.59694	3.75498	0	2.25169	2.44084	3.16516	2.82325	3.65069	3.61892	3.8164	3.34687	3.10756	3.32038	3.56618	1.1197	2.93115	1.86304	3.44201	1.17054	2.96665	2.34905	3.5164	1.77678	3.07509	0.99088	654817	SH3PXD1C
PRR11	proline rich 11	-1.92992	-0.94854	3.94e-08	5.63e-06	8.3433	1	9.04217	6.99255	9.333	7.35051	8.92485	7.13665	8.53537	8.70656	8.06274	7.49504	8.76761	7.41288	8.70673	7.5108	8.69324	7.41555	7.84284	8.10238	8.43708	7.80654	9.33302	8.03054	9.11739	7.36523	8.88077	8.27688	7.70675	8.1296	8.87702	7.74334	55771	-
FLVCR1	feline leukemia virus subgroup C cellular receptor 1	-1.92983	-0.948476	9.64e-07	7.91e-05	7.0775	1	6.68921	6.72146	7.24515	6.67031	7.44821	6.38342	8.20955	6.55717	8.01737	6.46132	8.12452	6.72571	7.98063	6.72515	8.26024	6.73479	7.22473	6.42714	7.81922	6.73568	6.63377	6.33614	6.67767	5.70844	7.20048	6.0704	6.17398	7.02702	6.53301	5.78939	28982	AXPC1, FLVCR, MFSD7B, PCA, PCARP
DNAJB5	DnaJ (Hsp40) homolog_ subfamily B_ member 5	-1.92797	-0.947081	0.000575	0.010974	4.9994	2	4.28406	3.95818	4.92404	4.46012	6.28171	4.34755	5.77488	3.5445	6.17962	4.96665	5.52874	3.79855	5.70036	3.0453	5.37757	2.48213	5.74343	4.44258	5.91373	3.67018	4.89325	3.68592	5.46141	3.54017	4.96303	5.04773	4.68277	4.51346	4.46234	6.40818	25822	HSC40
HOMER3	homer scaffolding protein 3	-1.92517	-0.944989	9.39e-07	7.74e-05	9.1104	1	8.62606	8.48099	8.79544	8.04008	10.6329	8.14445	9.19023	9.20776	10.0779	8.82043	9.5664	7.88573	9.74671	7.52349	9.6177	7.53454	9.72187	8.51065	10.0442	8.55599	9.3672	8.67197	8.838	8.87493	8.7301	8.63488	9.21288	8.97066	9.01459	8.94463	9454	HOMER-3, VESL3
LPPR1	lipid phosphate phosphatase-related protein type 1	-1.92319	-0.943498	0.002196	0.03073	3.8081	2	2.91131	2.21279	4.67047	2.3791	4.39472	2.59694	3.94261	3.71046	3.70484	2.62477	5.38327	2.01392	4.95039	3.0453	4.83213	3.69229	4.37921	4.44258	2.20631	3.73516	5.42533	3.68592	4.37407	3.61572	3.66524	2.96805	1.53542	4.10244	3.7419	1.57279	54886	PRG-3
CENPH	centromere protein H	-1.92161	-0.942319	1.11e-10	4.7e-08	6.1654	2	6.57046	5.25799	6.81459	5.86168	7.09878	5.31168	6.31751	6.54624	7.26448	5.71914	6.31864	5.8191	6.89037	5.69449	6.60284	5.16442	6.25608	5.7614	6.56968	5.51016	6.33138	5.67574	6.47435	5.09383	6.04985	5.84914	6.19283	5.42832	6.43321	4.93649	64946	-
APOBEC3G	apolipoprotein B mRNA editing enzyme_ catalytic polypeptide-like 3G	-1.91407	-0.936642	0.003682	0.045697	5.4547	2	4.01973	4.72519	4.67047	5.84067	6.21842	3.85466	6.13709	3.5445	6.23832	4.86067	6.79199	5.75965	6.74247	5.55303	6.53319	6.57738	6.98547	4.2463	6.44353	3.96926	4.9459	3.9549	4.84849	3.46043	5.00739	3.80396	4.17701	3.62342	3.86957	3.5682	60489	A3G, ARCD, ARP-9, ARP9, CEM-15, CEM15, MDS019, BK150C2.7, DJ494G10.1
PPM1N	protein phosphatase_ Mg2+/Mn2+ dependent_ 1N (putative)	-1.91154	-0.934736	9.07e-05	0.002671	4.1082	2	3.43089	2.88019	4.21841	2.59515	5.4175	2.59694	4.47583	3.35695	4.92347	2.22999	4.95931	2.97035	4.70922	3.61892	4.83213	3.69229	4.3254	4.34777	4.50396	4.07346	5.04576	4.4224	3.76121	4.2105	4.60723	3.0887	4.73514	4.56367	3.44668	3.15367	147699	-
SGOL1	shugoshin-like 1 (S. pombe)	-1.90437	-0.929313	1.97e-05	0.000827	4.5566	2	5.20463	4.26142	5.21758	3.47055	5.03219	3.85466	4.86428	4.61294	4.36208	4.10784	4.78491	3.44308	4.32474	4.34675	4.69306	3.05997	5.04443	4.34777	4.19784	3.67018	5.38776	4.18153	5.70416	4.05632	6.04985	4.51345	4.01702	4.87335	4.81935	1.9863	151648	CAID, NY-BR-85, SGO, SGO1
PDLIM7	PDZ and LIM domain 7 (enigma)	-1.90386	-0.928925	1.03e-05	0.00051	8.9079	1	8.23129	8.09153	8.46076	7.66918	9.89708	8.11847	9.36451	8.86679	9.97379	8.43058	9.50442	7.78	9.80379	7.18286	9.55005	7.54166	9.51207	8.2208	10.1977	8.52647	9.10605	8.25889	8.12463	8.89402	8.64491	8.47251	9.11993	8.9983	8.00004	8.70967	9260	LMP1, LMP3
IFI35	interferon-induced protein 35	-1.90233	-0.927767	5.09e-07	4.69e-05	7.277	1	8.0743	7.15778	7.40363	7.25055	7.90539	6.78682	6.63127	6.06915	7.01875	6.10686	8.06374	6.4277	8.01896	7.44558	7.73489	7.30271	8.02267	6.36798	7.55098	7.08637	6.51682	6.69866	7.32807	6.44817	8.16653	6.71062	7.99142	5.6993	7.68126	5.95927	3430	IFP35
HYAL3	hyaluronoglucosaminidase 3	-1.90173	-0.927314	0.000579	0.011015	6.1473	2	5.7181	5.72271	5.852	5.98165	7.6355	5.37156	6.56615	5.42497	7.26448	5.54758	7.19217	6.26621	7.3412	6.08552	7.02145	6.73479	6.85861	4.76958	7.12736	3.79735	5.49765	4.54972	5.37048	5.19583	5.13282	5.52493	4.88172	5.28603	5.20552	4.98228	8372	HYAL-3, LUCA-3, LUCA3
B4GALT6	UDP-Gal:betaGlcNAc beta 1_4- galactosyltransferase_ polypeptide 6	-1.89703	-0.923743	0.000171	0.004348	5.0812	2	5.60985	4.26142	6.09856	3.76621	5.65113	3.93625	5.70745	5.89043	5.74614	2.62477	5.73471	3.22599	5.15697	2.73181	5.88854	3.79121	5.26057	4.61532	5.49513	5.54682	4.45852	5.114	4.97733	5.06716	5.51723	4.71434	5.4186	4.79144	5.54851	3.88982	9331	B4GAL-T6, BETA4GAL-T6
COL4A6	collagen_ type IV_ alpha 6	-1.89468	-0.921956	0.002798	0.036953	4.6975	2	2.68613	4.45321	3.87781	4.46012	5.57738	4.71425	5.72461	3.62986	5.66288	5.54758	5.22146	4.08352	5.38535	3.17972	5.996	2.70147	6.05584	4.34777	6.38233	3.00686	4.22284	4.23303	4.09994	2.42716	3.66524	4.22839	4.09923	4.23229	3.27282	3.98285	1288	CXDELQ22.3, DELXQ22.3, DFNX6
ARSB	arylsulfatase B	-1.89191	-0.919841	0.001669	0.024909	4.4689	2	4.01973	3.67988	5.42897	5.36948	5.38904	4.34755	5.42216	3.25316	5.18454	5.35284	4.99981	3.63174	5.1842	4.09783	5.46567	3.97077	5.34412	3.41694	5.64856	2.50895	4.30575	1.86304	4.43517	3.28639	3.87129	2.6915	2.74334	4.16883	3.86957	3.15367	411	ASB, G4S, MPS6
QPCT	glutaminyl-peptide cyclotransferase	-1.89117	-0.919277	0.003389	0.042932	7.6672	1	6.75603	4.72519	8.44464	5.1134	7.49569	4.34755	7.86351	8.17157	8.96548	4.78542	8.67374	5.07326	7.84215	5.22017	8.25716	5.46335	8.4225	7.56815	8.43708	8.24063	8.18731	7.4842	7.66424	8.07658	7.8385	7.10324	7.74556	7.25803	7.66376	7.90659	25797	GCT, QC, SQC
PGP	phosphoglycolate phosphatase	-1.88979	-0.918227	0.000211	0.005081	9.0822	1	8.46006	8.90963	8.51194	8.82384	10.7758	8.62535	9.66699	8.65658	10.3085	8.93802	10.1591	8.85217	10.1075	8.69538	9.70513	9.16591	9.69692	7.81404	9.82825	7.61697	8.35729	7.99742	8.37905	8.07658	8.30179	8.43602	7.75827	7.88003	8.16468	7.88265	283871	PGPASE
IFI30	interferon_ gamma-inducible protein 30	-1.88972	-0.918174	1.87e-14	3.58e-11	7.0965	1	7.57112	6.53608	7.69689	6.39578	7.85426	6.35403	7.08091	7.16231	7.56889	5.90836	7.49806	6.50214	7.6406	6.72515	7.67147	6.12532	7.01127	6.71043	7.56207	7.12325	7.41867	6.51322	6.95305	6.89743	7.68311	6.37326	7.54748	6.41147	7.4039	6.15188	10437	GILT, IFI-30, IP-30, IP30
NRIP3	nuclear receptor interacting protein 3	-1.88882	-0.917489	0.000164	0.00423	4.0191	2	3.86686	3.57375	5.32714	3.3568	3.08969	4.08676	3.88273	3.02008	3.78578	3.5028	4.83053	3.10382	4.16985	2.73181	3.24903	3.69229	4.70838	3.82153	4.25359	2.50895	5.30956	3.52994	5.27343	3.75591	4.21179	3.73168	3.25464	4.29308	5.34386	3.5682	56675	C11ORF14, NY-SAR-105
CST6	cystatin E/M	-1.88818	-0.916997	0.003321	0.042367	14.0551	1	11.9493	13.4612	13.1719	11.3473	15.0397	12.0962	14.2497	13.7706	15.4491	13.1979	16.0639	14.0615	14.825	13.6262	15.446	14.6329	14.9129	12.9639	14.5822	13.4815	13.6747	13.4324	12.2389	13.2234	12.0766	13.1367	12.4734	13.2114	13.1025	13.2905	1474	-
SLC4A7	solute carrier family 4_ sodium bicarbonate cotransporter_ member 7	-1.88806	-0.916903	2.33e-05	0.000933	6.7644	2	6.50289	6.63174	6.78928	6.19528	7.56729	6.97231	8.0001	6.08436	7.29245	6.71555	7.64572	6.1932	7.57008	6.85138	7.52025	6.96411	7.41064	5.45523	7.30276	5.74915	6.1637	5.69423	6.54536	5.06716	7.26585	5.18939	5.75928	6.18962	6.58974	5.30409	9497	NBC2, NBC3, NBCN1, SBC2, SLC4A6
EPOR	erythropoietin receptor	-1.88778	-0.916692	3.63e-05	0.00132	3.8855	2	4.57474	3.33475	4.92404	3.23331	4.60728	2.78486	4.05537	4.38639	4.41393	3.40564	3.74398	1.71329	3.99632	3.17972	4.00461	2.22335	4.21135	3.50745	3.37835	2.65044	4.72269	3.75801	4.37407	4.16091	4.71814	3.39981	4.45194	4.40747	4.61589	2.79168	2057	EPO-R
TOP2A	topoisomerase (DNA) II alpha	-1.88701	-0.916102	1.21e-14	2.62e-11	9.1189	1	9.53191	8.5208	9.60367	8.99519	9.76074	8.53657	9.4585	8.90796	9.29938	8.77981	9.88559	8.62396	9.61654	8.82413	9.70965	8.65077	9.2807	8.47464	9.40608	8.10584	9.7169	8.45599	9.58161	7.87223	9.55433	8.64476	8.58344	8.89423	9.29319	7.90659	7153	TOP2, TP2A
PBK	PDZ binding kinase	-1.8858	-0.915178	7.32e-06	0.000391	7.2967	1	7.41445	7.33066	8.14386	7.60212	7.88005	6.96261	7.5441	6.56803	7.77127	6.88733	8.20898	7.09788	8.08186	7.35613	7.78283	7.39996	7.8853	6.38001	7.80529	6.21556	6.80029	6.61378	7.65142	5.35863	7.78217	5.89949	6.73308	5.34464	7.25986	5.73693	55872	CT84, HEL164, NORI-3, SPK, TOPK
RAD54L	RAD54-like (S. cerevisiae)	-1.88254	-0.912684	1.03e-07	1.29e-05	5.7392	2	6.3952	5.53749	6.42861	4.96602	5.93322	5.63856	6.48794	5.35148	5.84389	5.61433	5.35232	4.74575	5.84391	4.28843	5.6649	4.58111	6.43188	5.83315	6.55866	3.96926	6.20748	5.02914	6.33702	4.73577	6.26609	5.54616	6.21143	5.90804	5.79358	5.19165	8438	HR54, RAD54A, HHR54, HRAD54
PTPLA	3-hydroxyacyl-CoA dehydratase 1	-1.88253	-0.912673	0.000101	0.002879	5.8552	2	5.07103	5.86449	5.99168	6.24408	7.15056	5.98376	6.32877	5.01316	6.70169	5.50131	6.95533	5.49385	6.74247	5.86382	6.32522	5.37042	6.86805	4.44258	6.40713	4.67995	4.38415	5.05799	5.0956	4.51675	5.79539	4.67634	6.22979	4.87335	5.4701	4.44197	9200	CAP, PTPLA, HACD1
BIRC5	baculoviral IAP repeat containing 5	-1.88177	-0.912093	3.01e-05	0.001144	8.9934	1	9.03022	8.83119	9.5444	9.09612	9.97214	8.64671	9.18249	8.01775	9.60978	8.66904	10.1802	8.69444	9.97732	9.02724	9.79502	9.34958	9.72187	7.99699	9.58649	7.73685	8.22508	7.99742	8.67658	7.39234	8.95058	8.00139	7.95876	7.43029	8.57846	7.64713	332	API4, EPR-1
CRMP1	collapsin response mediator protein 1	-1.87681	-0.908283	0.00055	0.010571	5.5396	2	4.87117	4.72519	5.25503	3.85267	6.04688	4.96809	7.04722	5.27404	7.01875	5.00032	4.73781	5.07326	6.00532	3.71061	5.37757	2.48213	5.82325	5.47779	7.11988	5.20073	5.59976	4.80925	4.97733	5.09383	5.21077	4.85707	5.90354	5.86863	5.4701	5.7634	1400	CRMP-1, DPYSL1, DRP-1, DRP1, ULIP-3
PLA2G4E	phospholipase A2_ group IVE	-1.87632	-0.907903	0.004024	0.048721	8.5116	1	7.16409	8.53147	6.5985	6.62189	8.95913	8.83929	10.5786	8.62575	9.64546	8.82043	8.76468	7.85292	9.29445	7.51716	9.31533	7.19843	9.64707	6.41551	9.82481	6.70357	8.44221	6.70779	6.77542	7.3376	7.12196	7.0816	7.44902	8.4056	7.31697	8.25789	123745	-
UBE2C	ubiquitin-conjugating enzyme E2C	-1.87281	-0.905206	7.69e-09	1.54e-06	7.8377	1	8.61611	6.7461	8.59826	7.21017	8.49837	6.91309	7.77159	7.73912	7.61945	7.37184	7.8198	7.16051	7.88842	6.99506	8.14156	6.8767	7.64835	7.41874	7.98894	6.98314	8.87443	7.29725	8.50907	7.08856	8.64491	7.67027	7.56928	8.24179	8.41542	7.02624	11065	UBCH10, DJ447F3.2
ERCC6L	excision repair cross-complementation group 6-like	-1.87191	-0.904509	5.49e-07	4.98e-05	4.8898	2	5.73292	4.11775	6.03538	5.21483	5.20539	4.34755	4.47583	4.61294	4.85009	4.53281	5.50079	4.66165	5.40864	4.28843	5.70164	4.63538	4.94088	4.34777	4.93746	3.53072	5.38776	2.79388	5.27343	3.94354	5.57732	4.67634	4.88172	4.51346	5.05248	4.68285	54821	PICH, RAD26L
AGAP2	ArfGAP with GTPase domain_ ankyrin repeat and PH domain 2	-1.87151	-0.904203	0.000136	0.00361	4.5197	2	4.78845	3.19855	5.66987	3.47055	4.91732	3.23522	5.48391	4.33647	5.76623	3.76027	5.32071	3.71755	4.70922	2.07879	3.94456	1.90778	4.62174	4.29793	5.09835	4.3473	4.45852	4.28275	4.707	4.73577	4.1339	4.37795	4.83449	4.95085	4.88126	4.56743	116986	CENTG1, GGAP2, PIKE
SLC29A4	solute carrier family 29 (equilibrative nucleoside transporter)_ member 4	-1.87076	-0.903626	8.77e-05	0.002604	5.6169	2	5.4396	5.25799	6.39545	3.67422	4.99491	3.85466	4.89491	4.94817	6.40131	5.45349	5.66087	5.6106	6.24405	4.02825	5.62719	4.87974	6.43188	6.52788	6.62357	4.30512	6.04804	4.93897	6.53143	4.80196	5.57732	4.98694	5.7078	5.48153	6.60816	4.88921	222962	ENT4, PMAT
ACOT7	acyl-CoA thioesterase 7	-1.86989	-0.90295	3.72e-07	3.6e-05	10.1027	1	10.2375	8.99177	10.2519	9.00938	11.3625	8.82597	10.6633	10.276	10.9414	9.39091	10.8332	9.22978	10.9521	8.93758	10.8382	9.12857	10.2635	9.58339	10.6257	9.72479	10.0106	9.78357	9.63142	9.87339	9.81673	9.97483	9.37636	9.71945	10.2487	9.95613	11332	ACH1, ACT, BACH, CTE-II, LACH, LACH1, HBACH
MAFG-AS1	MAFG antisense RNA 1 (head to head)	-1.8656	-0.899637	0.003387	0.042932	3.9788	2	3.27759	4.45321	2.78067	3.85267	5.33038	3.93625	5.31298	3.5445	4.85009	3.30147	5.6354	3.87524	4.63219	3.61892	5.25931	4.52473	4.15075	3.1054	4.30726	1.97546	3.29811	3.04506	2.19798	3.75591	3.28761	2.83639	4.01702	1.77678	3.98685	1.57279	92659	-
RAB30	RAB30_ member RAS oncogene family	-1.86549	-0.899557	1.94e-05	0.000818	4.9255	2	5.11695	4.32822	6.09856	4.22102	4.95664	3.85466	5.48391	4.33647	5.35338	4.82353	5.11489	3.63174	5.21094	3.87816	5.25931	3.69229	5.7018	5.36128	5.34924	4.61237	5.89579	4.87557	5.65363	3.08844	3.96424	4.78747	4.01702	4.9881	5.7277	4.30455	27314	-
NUF2	NUF2_ NDC80 kinetochore complex component	-1.86413	-0.898503	3.77e-06	0.000239	6.5628	2	6.71929	6.75827	7.20744	6.76254	7.18407	6.66047	6.59442	5.66632	6.81208	6.19672	7.67102	6.14755	7.05434	5.94157	7.17307	6.84251	7.26816	5.26078	6.81173	5.54682	6.24998	6.03617	6.98405	5.14573	7.2382	5.70559	6.19283	5.05983	6.60816	4.68285	83540	CDCA1, CT106, NUF2R
KIAA1524	KIAA1524	-1.86197	-0.896826	3.86e-10	1.35e-07	5.5386	2	6.09601	5.4502	6.11901	5.58687	5.93322	5.21691	5.90096	5.22001	5.8995	5.32654	5.91492	5.49385	6.24405	4.22765	6.15018	5.12703	6.12046	4.87533	6.07713	5.22356	5.04576	4.33082	5.77677	4.00103	6.04985	5.04773	5.5116	5.05983	5.97488	4.62629	57650	CIP2A, P90
FAM72B	family with sequence similarity 72_ member B	-1.86121	-0.896241	0.002845	0.037396	2.5869	2	3.63404	2.69009	2.97276	1.42269	2.37127	1.42403	2.85806	2.8877	3.32622	0	2.65845	1.33307	3.29859	0	2.78442	2.48213	2.0171	1.91301	3.16235	3.00686	4.13487	2.48956	1.88412	2.42716	3.66524	3.0887	3.5164	1.77678	3.60183	3.30547	653820	P17
MRAP2	melanocortin 2 receptor accessory protein 2	-1.85877	-0.894347	0.001807	0.026499	6.1763	2	4.73055	6.37162	5.66987	5.84067	6.93127	6.09452	7.30274	5.35148	7.7861	5.85415	7.73238	6.1932	7.12632	5.67186	7.2923	6.21714	6.74022	5.18053	6.50224	4.67995	5.63225	5.61879	5.62769	5.22024	4.66375	5.18939	4.25081	4.23229	5.10532	4.78971	112609	BMIQ18, C6ORF117, BA51G5.2
SLC27A1	solute carrier family 27 (fatty acid transporter)_ member 1	-1.85796	-0.893722	2.91e-06	0.000191	7.4038	1	6.77047	6.77033	6.98029	6.82803	8.05327	7.22046	7.92417	7.04289	8.34237	7.50093	7.5603	6.70485	8.28736	6.27765	8.54945	5.85503	8.2199	7.19872	8.58293	6.64559	6.84256	6.28825	7.29548	7.10176	7.17154	6.89565	7.4953	6.86627	7.00567	7.09036	376497	ACSVL5, FATP, FATP-1, FATP1
ANTXR2	anthrax toxin receptor 2	-1.85751	-0.89337	0.003707	0.045817	5.2265	2	3.63404	5.15134	4.92404	5.61188	6.04688	6.3088	6.05809	2.8877	5.76623	5.61433	6.14897	3.10382	6.43755	4.65443	5.88854	3.88378	6.70904	3.95616	6.4315	3.37631	4.13487	3.44514	4.97733	4.16091	4.71814	3.57527	5.17499	4.56367	4.19618	4.73727	118429	CMG-2, CMG2, HFS, ISH, JHF
C18orf54	chromosome 18 open reading frame 54	-1.85405	-0.890677	0.000177	0.004469	4.7453	2	5.13938	3.04813	5.66987	4.15449	4.07562	4.08676	5.37947	5.24728	4.73251	3.90949	4.63871	2.82325	5.31317	4.45676	5.23445	1.90778	5.26057	4.13714	4.71724	4.89428	5.34919	4.70369	5.05725	3.54017	6.1718	3.80396	5.17499	5.19339	4.75467	4.50606	162681	LAS2
MTFR2	mitochondrial fission regulator 2	-1.85173	-0.888874	0.000779	0.013956	4.9268	2	5.68799	3.45919	6.39545	3.93425	4.45087	4.61863	4.55468	5.32613	4.55915	3.59383	5.0392	3.94806	3.99632	3.30267	4.86489	3.97077	4.82931	5.09555	4.54922	4.83622	5.84124	4.66671	5.75297	4.30483	6.28423	4.37795	4.83449	5.40096	6.13591	2.30731	113115	DUFD1, FAM54A
ZNF584	zinc finger protein 584	-1.85172	-0.888869	1.15e-09	3.52e-07	6.4508	2	6.15223	5.38893	7.1086	5.63647	6.9411	5.88448	6.99869	5.68639	7.15448	5.73922	7.20954	5.77974	7.2345	6.11938	7.2923	5.87772	6.84911	6.49508	7.06641	5.7648	6.72697	5.74832	6.23761	6.40623	6.57693	6.02576	5.59897	6.07312	6.58974	6.15188	201514	-
LSM11	LSM11_ U7 small nuclear RNA associated	-1.85169	-0.888841	9.45e-06	0.000476	3.6945	2	4.54145	2.21279	4.29233	2.59515	3.56709	3.76819	4.43472	3.14132	4.46398	2.9344	4.47601	2.97035	3.65069	3.71061	4.65609	3.69229	4.43109	3.21689	3.88135	4.07346	3.83333	2.92493	3.85363	3.19081	4.48707	3.73168	4.25081	3.18408	2.23686	3.15367	134353	-
GJB3	gap junction protein_ beta 3_ 31kDa	-1.84951	-0.887143	9.14e-07	7.59e-05	10.4658	1	10.3672	10.2243	9.79063	9.65786	11.5119	10.0218	11.2193	10.0469	11.6181	10.1992	11.1884	10.0622	11.407	9.75549	11.2418	10.0192	11.0806	9.56375	11.24	9.6739	10.0305	9.86744	10.145	10.0481	9.75953	9.80141	9.83051	9.59067	10.1562	10.1973	2707	CX31, DFNA2, DFNA2B, EKV
FOXD2-AS1	FOXD2 antisense RNA 1 (head to head)	-1.84916	-0.88687	0.003441	0.043415	4.2688	2	3.56945	4.67474	3.97079	3.3568	5.06853	4.01347	5.03901	3.92829	5.0599	4.70603	4.15593	4.66165	4.98178	3.61892	5.75506	2.22335	5.49798	3.41694	6.0616	3.53072	3.5904	2.92493	2.67413	3.94354	3.96424	2.6915	4.38796	3.80136	1.79735	2.56973	84793	-
RBBP8	retinoblastoma binding protein 8	-1.84717	-0.885317	0.000893	0.015542	8.3702	1	7.46416	8.57682	7.69689	8.08988	9.39805	8.31428	9.11904	7.27922	9.60978	8.15599	9.75417	8.11254	9.39404	8.34815	9.34467	8.41131	9.29126	7.40703	9.12522	7.37338	7.30235	7.5415	7.57203	6.7119	7.51662	7.15942	7.07533	7.05361	7.36109	6.6401	5932	COM1, CTIP, JWDS, RIM, SAE2, SCKL2
FBXO17	F-box protein 17	-1.84557	-0.884064	0.000727	0.013187	6.0828	2	5.04751	6.16784	5.55444	5.86168	7.25675	6.05854	7.03352	4.52654	7.09219	6.44918	7.05478	5.98402	7.09795	5.71678	7.05733	5.60606	6.80063	5.88471	7.02696	4.64656	5.49765	3.61004	5.72877	4.80196	5.48623	4.89065	5.13657	5.48153	5.20552	5.02665	115290	FBG4, FBX26, FBXO26, FBX17
ZP1	zona pellucida glycoprotein 1 (sperm receptor)	-1.84124	-0.880674	0.002323	0.031955	4.108	2	3.63404	3.33475	5.09901	1.81609	4.45087	3.10014	3.37513	4.61294	4.95881	2.62477	5.25531	3.33861	5.1842	1.77332	4.86489	4.52473	4.52956	4.01905	4.50396	1.97546	4.72269	3.04506	3.44201	2.2488	3.96424	3.6556	4.68277	5.02441	4.37896	4.3749	22917	HEL163, OOMD
FHL3	four and a half LIM domains 3	-1.84037	-0.879992	2.92e-08	4.64e-06	6.2352	2	6.82682	5.07559	6.7373	4.75772	7.00813	5.08002	6.31751	6.77893	6.85959	5.06538	6.65924	5.8191	6.79642	5.69449	6.24035	5.27109	6.07227	5.83315	6.7741	6.14557	7.02492	5.5993	6.51737	6.03175	6.30215	6.01057	6.41775	5.94639	6.58974	5.50566	2275	SLIM2
IFIT2	interferon-induced protein with tetratricopeptide repeats 2	-1.83856	-0.878578	0.003209	0.041182	5.4996	2	6.75603	4.62247	5.64187	4.9267	4.3363	4.71425	4.66543	5.19221	3.09167	3.67945	4.87475	5.16776	4.91831	5.42353	5.23445	4.58111	5.14105	5.56466	5.32342	5.70117	5.78455	5.57954	5.62769	4.43568	7.16176	4.27999	7.85017	4.56367	5.85657	4.3749	3433	G10P2, GARG-39, IFI-54, IFI-54K, IFI54, IFIT-2, ISG-54 K, ISG-54K, ISG54, P54, CIG42
CDC45	cell division cycle 45	-1.83798	-0.87812	1.07e-11	5.94e-09	6.7507	1	7.1804	6.47842	7.50815	6.82803	7.65356	6.50872	6.78637	5.83758	7.08421	6.72565	6.96559	6.11629	7.6108	6.0683	7.16651	6.57738	7.06151	6.1605	7.10481	6.05938	6.89705	5.80047	6.75159	5.56332	7.07063	6.26219	6.5108	6.17354	7.24816	6.06944	8318	CDC45L, CDC45L2, PORC-PI-1
CRIP2	cysteine-rich protein 2	-1.83535	-0.876055	0.00034	0.007256	10.9451	1	9.9462	10.165	9.96885	9.98303	12.5217	9.60024	11.484	10.1188	12.2024	10.3274	11.8565	10.8064	12.0114	10.9519	11.7893	11.1513	11.399	10.695	11.6046	10.0778	10.4854	10.4475	11.1247	10.4215	9.41309	10.2939	9.95854	10.1403	9.98704	9.83347	1397	CRIP, CRP2, ESP1
CENPE	centromere protein E_ 312kDa	-1.83359	-0.874669	1.65e-08	2.96e-06	7.0642	1	7.91447	6.70898	8.23102	7.10841	7.25675	6.74214	6.92639	7.14066	6.62677	6.30845	7.34929	6.51418	7.43488	6.57466	7.31619	5.83198	6.82022	6.33129	7.39241	6.37697	7.28201	6.80459	7.78064	5.94653	7.9732	6.51995	7.25643	6.78395	7.31697	5.9362	1062	CENP-E, KIF10, MCPH13, PPP1R61
USP2	ubiquitin specific peptidase 2	-1.83147	-0.873006	0.000178	0.00448	6.8281	2	6.57869	6.27332	6.53901	3.93425	7.59247	5.73291	7.73396	6.50164	8.11458	6.42459	7.09271	6.33571	7.50677	5.33986	7.3043	5.33807	7.79414	6.0743	7.87804	6.56745	6.85638	6.2133	6.01555	6.41683	5.96243	6.88736	6.54053	7.13888	6.82844	6.88875	9099	UBP41, USP9
RHOBTB3	Rho-related BTB domain containing 3	-1.8314	-0.872944	2.3e-05	0.000928	5.6365	2	6.34785	4.26142	6.42861	4.22102	5.65113	3.10014	6.58506	5.32613	6.28083	4.5781	6.49897	4.82523	5.79174	4.69988	5.9661	4.68767	6.48193	4.90892	5.86086	5.52861	5.94835	5.657	5.54694	5.94653	5.69047	5.70559	5.75928	5.50741	4.94062	5.73693	22836	-
TUBA1A	tubulin_ alpha 1a	-1.82792	-0.8702	0.00013	0.003499	10.2243	1	9.60019	9.76928	10.238	9.65185	11.3933	9.68382	10.9947	9.53957	11.3422	9.77331	11.6261	10.1332	11.1865	9.89028	10.9531	10.7931	10.7684	8.99612	10.33	9.06423	9.75428	9.16337	9.67323	9.44534	9.45373	9.30133	9.18726	8.93534	9.6158	9.89311	7846	B-ALPHA-1, LIS3, TUBA3
MEX3B	mex-3 RNA binding family member B	-1.82753	-0.869897	0.003922	0.047808	3.8747	2	2.55882	3.04813	4.29233	4.15449	4.07562	3.23522	4.66543	2.57978	4.13378	4.96665	5.28838	3.54049	4.78233	3.79681	4.32032	4.05281	5.54583	2.85267	4.75636	2.77928	3.29811	2.79388	3.31772	3.19081	1.97146	2.34905	4.62844	1.38832	3.7419	3.30547	84206	MEX-3B, RKHD3, RNF195
DDX60	DEAD (Asp-Glu-Ala-Asp) box polypeptide 60	-1.82696	-0.869445	1.64e-05	0.000718	7.4846	1	8.47116	7.8458	7.62003	7.62072	7.15901	7.46686	7.18992	6.34637	6.5593	6.26756	7.72636	6.29442	7.95319	7.31289	7.4518	6.98515	8.00566	6.46151	7.5894	7.3108	7.4735	6.88728	7.56521	6.15083	8.50109	6.9039	8.80172	6.38379	8.37833	6.77628	55601	-
VRK1	vaccinia related kinase 1	-1.82586	-0.868575	1.1e-12	9.7e-10	6.925	1	7.45077	6.75827	7.97457	6.59706	7.28018	6.3088	6.74493	6.1865	6.86891	6.58851	7.56705	6.40201	7.3652	6.39285	7.10612	6.67127	7.08598	6.40377	7.12736	6.08453	7.42796	6.67092	7.4515	5.60099	7.59864	6.48739	6.73308	6.67397	7.30573	6.26734	7443	PCH1, PCH1A
C4orf47	chromosome 4 open reading frame 47	-1.82423	-0.867288	0.00017	0.004318	3.748	2	3.86686	2.88019	4.61394	2.3791	4.39472	2.78486	4.00009	3.25316	3.52791	2.9344	4.08242	2.47461	3.39499	3.41597	3.51985	3.79121	3.44692	3.59261	4.30726	3.9142	4.38415	4.18153	3.94049	3.28639	3.96424	3.20002	5.54132	3.88272	4.68695	2.56973	441054	-
IFI27	interferon_ alpha-inducible protein 27	-1.81927	-0.863359	1.75e-06	0.000131	13.2738	1	13.4185	13.517	13.2292	13.0682	14.5475	12.6277	13.1805	11.9149	13.4482	12.1376	14.2898	12.6067	14.0246	13.3012	13.7887	13.6735	13.7693	12.356	13.5125	12.5781	13.2756	12.7495	12.8981	12.5029	13.5643	12.1824	13.094	12.6852	13.7337	11.9565	3429	FAM14D, ISG12, ISG12A, P27
CDC25C	cell division cycle 25C	-1.81847	-0.862729	0.000188	0.004675	4.5204	2	5.07103	3.87124	5.87624	4.08475	4.74838	3.35873	4.55468	4.38639	3.86242	3.97868	5.0392	3.63174	5.07203	3.71061	4.41187	3.69229	4.79011	5.36128	5.15799	3.60213	4.89325	3.44514	5.20491	3.08844	4.87	4.89065	3.5164	4.51346	5.6936	3.15367	995	CDC25, PPP1R60
RHOBTB2	Rho-related BTB domain containing 2	-1.81828	-0.862571	0.001339	0.021195	5.2532	2	4.54145	4.77394	3.43112	4.28461	5.93322	5.45697	6.58506	4.84485	6.46414	5.54758	5.22146	4.20734	5.87767	3.30267	5.73748	3.58608	6.45713	4.29793	6.59148	4.61237	4.22284	4.18153	5.23958	5.24425	4.60723	4.55593	5.68135	4.51346	4.54116	5.70997	23221	DBC2
CISH	cytokine inducible SH2-containing protein	-1.81821	-0.862515	0.003882	0.04739	5.5811	2	3.86686	5.03617	3.87781	5.1134	6.41471	4.88834	6.5566	5.24728	6.89651	6.07561	6.51303	5.56503	6.91497	4.94611	6.76787	5.12703	6.58857	4.87533	6.83018	3.29243	4.72269	4.50852	3.76121	4.39337	4.28568	4.98694	4.83449	5.19339	4.37896	4.98228	1154	BACTS2, CIS, CIS-1, G18, SOCS
SKA1	spindle and kinetochore associated complex subunit 1	-1.81591	-0.860692	2.89e-08	4.64e-06	5.4687	2	6.2482	5.18777	5.9466	5.21483	5.60238	5.58897	6.12422	5.07535	4.88725	5.15779	6.13085	4.93678	5.86089	5.18863	6.16341	5.16442	5.74343	4.73253	6.0616	4.77573	6.27076	4.37734	5.13297	4.16091	6.02849	4.92346	5.0971	5.42832	5.85657	4.50606	220134	C18ORF24
DNLZ	DNL-type zinc finger	-1.81541	-0.860296	5.57e-06	0.000317	8.1837	1	8.40791	6.99255	8.62711	6.7847	9.55198	6.80865	8.11188	8.53738	8.90109	7.14983	9.15144	7.25681	8.51357	6.57466	8.42313	7.28584	8.14032	7.68909	8.57201	7.94689	8.38615	8.09807	8.33163	8.11939	8.31949	8.03931	7.69358	8.21061	8.38368	7.80196	728489	C9ORF151, HEP, HEP1, TIMM15, ZIM17, BA413M3.2
CENPA	centromere protein A	-1.81496	-0.859938	5.1e-06	0.000301	5.68	2	5.85987	5.74732	5.852	5.63647	6.79691	5.70989	6.14984	4.91455	6.19452	5.9434	6.01709	5.22748	6.41474	5.88365	6.42748	5.55066	6.49418	4.34777	5.80599	4.46691	5.56652	4.58978	6.03542	4.34978	5.51723	4.82269	5.65441	4.9881	5.6936	3.98285	1058	CENP-A, CENH3
CLEC11A	C-type lectin domain family 11_ member A	-1.81299	-0.858374	9.67e-05	0.002785	4.9889	2	4.15794	4.04017	5.32714	4.40396	6.31234	4.46216	5.42216	4.57038	5.8812	4.28219	6.03669	5.07326	6.20469	3.87816	5.60796	5.71085	4.52956	4.53154	4.93746	3.9142	4.72269	4.87557	4.97733	4.30483	5.42213	4.27999	4.92744	4.61219	4.61589	3.44281	6320	CLECSF3, LSLCL, P47, SCGF
FGFR4	fibroblast growth factor receptor 4	-1.81088	-0.856688	0.00037	0.007782	4.9669	2	5.1832	4.77394	6.32676	4.46012	5.44541	3.47249	4.62945	4.52654	4.46398	4.43772	3.9231	3.44308	5.43155	3.52101	5.40011	4.73814	5.28896	6.02919	5.47181	3.85696	5.69511	4.18153	5.16939	3.08844	5.69047	4.42454	5.35309	5.16114	5.88707	4.30455	2264	CD334, JTK2, TKF
PIP5KL1	phosphatidylinositol-4-phosphate 5-kinase-like 1	-1.81018	-0.856133	1.29e-05	0.000597	6.6614	2	6.25848	6.09298	6.5985	4.88628	7.62334	5.79982	7.7212	6.44388	7.79591	5.85415	7.6329	5.77974	7.26671	5.57759	7.40243	5.83198	6.93246	6.76648	7.03494	6.23815	5.99906	6.27602	5.95425	6.50888	6.45411	6.2363	6.87986	6.70785	6.34808	6.39131	138429	PIPKH, BA203J24.5
PHF19	PHD finger protein 19	-1.80906	-0.855244	8.13e-09	1.62e-06	6.4829	2	6.86096	5.84181	6.87598	6.30669	7.57363	6.522	6.94846	5.70617	6.90559	6.66397	6.70894	6.2081	6.67687	5.39618	6.80212	5.60606	7.10208	5.12444	6.96152	6.2269	6.97512	5.73052	6.95305	5.33647	6.15218	5.77915	6.36887	6.12421	6.64432	6.44134	26147	MTF2L1, PCL3, TDRD19B
HSD17B12	hydroxysteroid (17-beta) dehydrogenase 12	-1.80839	-0.854709	0.002991	0.038901	10.2047	1	9.1147	10.2298	9.28175	10.0348	11.0671	10.1492	11.9132	8.97474	11.4744	9.83874	11.5746	10.1593	11.0432	10.3767	11.3803	10.1887	10.6358	9.03657	10.5699	9.34489	8.65085	9.08671	8.88256	8.86141	9.16646	8.86347	8.8823	8.70307	9.06548	8.97609	51144	KAR, SDR12C1
HJURP	Holliday junction recognition protein	-1.80761	-0.854084	1.98e-06	0.000143	6.6799	2	7.05626	6.75827	6.80199	6.91097	6.96057	6.75344	6.92639	6.62111	6.68068	6.77511	7.17459	6.4277	7.18817	6.05086	7.31619	6.0869	7.4235	5.70514	7.5894	5.45336	6.94957	5.71249	6.81043	4.98406	7.35437	6.01057	6.44944	5.88847	6.87483	4.68285	55355	FAKTS, URLC9, HFLEG1
TNFRSF12A	tumor necrosis factor receptor superfamily_ member 12A	-1.80696	-0.853565	0.000293	0.006484	9.6463	1	9.77058	8.56648	9.89959	8.00275	10.7765	8.53002	9.68463	9.2772	10.5014	8.88943	10.116	7.08985	10.1744	7.37727	9.95195	8.10494	10.7366	9.28706	10.3096	9.72778	9.95866	9.50327	8.92312	9.73306	9.60753	9.23425	9.74371	9.79101	9.07875	10.1174	51330	CD266, FN14, TWEAKR
HERC5	HECT and RLD domain containing E3 ubiquitin protein ligase 5	-1.80637	-0.853092	6.95e-05	0.002171	6.1777	2	6.77047	6.98221	6.83946	6.29129	6.44267	6.05854	5.75832	5.42497	5.8812	5.42898	6.87052	5.16776	6.57765	6.13601	6.4707	5.30497	6.46958	5.38535	5.86086	5.00383	5.56652	5.69423	5.86824	4.92588	7.31079	5.66735	7.34334	4.40747	7.04677	5.30409	51191	CEB1, CEBP1
ZNF232	zinc finger protein 232	-1.8045	-0.851601	5.4e-06	0.000313	5.5202	2	5.52724	4.67474	5.61331	4.61658	6.04688	4.84675	6.21198	4.98103	6.19452	5.45349	6.81487	5.28484	6.19133	5.31086	6.28946	5.68536	6.36678	5.09555	6.23779	4.80629	4.04119	5.45494	5.37048	4.66639	5.17232	4.63731	5.24889	4.83297	5.50984	4.88921	7775	ZSCAN11
CSRP1	cysteine and glycine-rich protein 1	-1.80415	-0.85132	7.49e-05	0.002296	10.6138	1	9.99004	9.76627	10.2037	9.63517	11.8569	9.71449	11.5543	10.3852	11.6951	10.0684	11.801	9.98646	11.7122	9.80314	11.622	10.119	10.7589	10.2413	10.8463	10.2314	10.0396	10.3356	9.76534	10.2586	9.8582	10.3785	9.60285	9.78308	10.1733	10.3448	1465	CRP, CRP1, CSRP, CYRP, D1S181E, HEL-141
HSD17B7	hydroxysteroid (17-beta) dehydrogenase 7	-1.80393	-0.851146	0.003386	0.042932	8.1601	1	7.09119	8.43626	7.26364	7.83766	8.96878	8.29508	9.16375	7.16946	9.3131	7.48318	9.7378	8.0436	9.26446	8.2214	9.33739	8.35179	8.93934	6.69125	8.90792	6.99646	6.42708	6.90326	7.139	7.19092	7.31961	6.81049	6.84454	6.47844	6.57108	6.99307	51478	PRAP, SDR37C1
PTMS	parathymosin	-1.79942	-0.847532	1.16e-05	0.000557	11.4128	1	10.9355	10.5688	11.0463	10.4773	12.936	10.3505	12.0693	11.5916	12.1766	10.9084	12.036	10.5952	12.2066	10.304	12.1007	10.6637	11.6806	10.8528	11.9542	10.7124	11.9268	11.0416	11.0133	10.7787	10.9856	11.1473	10.7073	11.7391	11.0168	10.9028	5763	PARAT
KCTD12	potassium channel tetramerization domain containing 12	-1.79928	-0.847416	4.3e-10	1.49e-07	7.2333	1	7.19653	6.63174	7.26364	6.59706	7.67139	7.27636	8.10535	7.02724	7.58028	7.24418	7.6897	6.22285	7.78547	6.36491	8.01223	6.80749	7.47384	7.08576	7.79594	6.32515	6.78592	6.54413	7.55148	6.30715	7.73679	6.82793	7.16395	6.18962	7.76575	7.11112	115207	C13ORF2, PFET1, PFETIN
ANKRD36	ankyrin repeat domain 36	-1.79926	-0.847403	0.001695	0.025239	4.8343	2	4.4367	3.57375	4.5551	2.94923	3.66529	3.47249	4.30387	5.24728	5.15438	3.5028	4.29259	3.54049	4.11429	3.79681	4.92828	3.47143	4.97623	4.76958	5.54065	4.64656	6.1637	4.73974	5.80019	4.30483	6.26609	4.89065	6.19283	5.48153	5.42924	4.07025	375248	UNQ2430
FAM83F	family with sequence similarity 83_ member F	-1.7987	-0.846953	0.004032	0.048772	8.4526	1	7.88822	8.28472	7.48469	8.5507	10.1795	8.1909	8.94151	7.62939	9.7297	8.77981	9.30879	8.57019	9.62029	8.13302	9.33007	8.43062	9.00713	7.04101	9.44999	7.02922	6.68112	7.12393	7.3756	6.84344	7.28399	7.86867	7.46461	5.72159	7.3392	7.2856	113828	-
LY6D	lymphocyte antigen 6 complex_ locus D	-1.7961	-0.844867	0.000646	0.012006	12.0085	1	12.1009	10.7148	12.405	11.4622	13.261	11.0217	11.8688	12.2381	13.1861	10.9574	12.997	10.934	12.8266	10.8447	12.6575	11.073	12.4466	11.4312	12.7111	10.6875	12.3127	12.1102	12.3246	11.9516	10.0453	11.9942	9.93913	11.6602	10.7599	11.6934	8581	E48, LY-6D
PON3	paraoxonase 3	-1.79576	-0.844597	0.001433	0.022442	6.3699	2	5.4396	5.03617	6.37858	4.51418	6.58746	3.93625	6.76993	6.22816	7.40562	5.57018	7.88611	5.46932	7.14029	5.60174	7.31026	6.56345	7.63735	6.36798	7.06641	6.71166	5.86877	6.51322	6.39967	6.32976	5.28472	5.6866	5.80899	5.31563	5.10532	5.19165	5446	-
MELK	maternal embryonic leucine zipper kinase	-1.7954	-0.844309	1.02e-15	3.47e-12	6.9763	1	7.47301	6.33959	7.62719	6.76254	7.46194	6.39789	7.5441	6.86066	7.18464	7.02454	7.05478	6.45294	7.26671	6.10255	7.48906	6.53518	7.06151	6.08903	7.11236	6.37697	7.56048	6.14772	7.42915	6.0039	7.56935	6.50918	6.9917	6.76261	7.18819	6.72334	9833	HPK38
SGOL2	shugoshin-like 2 (S. pombe)	-1.79106	-0.840812	2.93e-08	4.64e-06	6.3266	2	6.8199	5.97285	7.39527	6.19528	7.09878	5.90489	6.42636	6.3337	6.08684	5.32654	6.83739	5.94896	6.59805	5.50262	6.67853	5.80855	6.44456	6.04438	6.07713	5.85528	6.07193	6.28825	7.24518	5.03999	6.88101	5.56708	6.03468	5.72159	6.9917	5.70997	151246	SGO2, TRIPIN
BAG2	BCL2-associated athanogene 2	-1.78995	-0.839916	0.002006	0.028591	4.5565	2	5.1832	4.72519	4.21841	4.66518	5.80983	4.51623	5.09285	3.92829	5.40553	4.96665	5.6354	3.87524	5.15697	5.25103	5.40011	3.88378	5.26057	3.21689	5.12848	3.73516	3.12626	3.25892	3.31772	2.2488	5.00739	2.53041	4.5132	4.23229	3.86957	3.15367	9532	BAG-2, DJ417I1.2
DNAH17	dynein_ axonemal_ heavy chain 17	-1.78992	-0.839897	0.001275	0.020372	5.8893	2	5.52724	6.05404	6.71058	5.0416	5.13859	5.48436	6.79451	4.38639	6.46414	6.34821	5.91492	3.79855	6.59805	4.65443	6.44925	5.04922	6.45713	6.88094	6.74523	4.3473	6.18575	4.37734	6.27151	4.47679	6.09166	4.51345	5.05652	6.38379	6.67959	4.50606	8632	DNAHL1, DNEL2
DDHD1	DDHD domain containing 1	-1.78839	-0.838658	0.001936	0.027806	6.5096	2	5.80482	6.05404	5.90008	5.90279	7.08996	6.61164	7.94627	5.80124	7.93548	6.72565	6.945	6.4277	7.16784	6.53759	7.54068	6.54939	7.77921	5.38535	7.39241	4.74451	5.97392	5.43309	5.33885	5.09383	5.60645	5.60803	5.13657	5.53284	5.10532	5.86466	80821	PA-PLA1, PAPLA1, SPG28
PTK2B	protein tyrosine kinase 2 beta	-1.78748	-0.837928	0.001568	0.024032	9.6892	1	8.43309	9.57493	8.14884	8.74408	10.497	9.75018	10.7141	9.03662	10.9062	10.1027	10.4615	8.97704	10.6496	8.52589	10.8252	8.61408	10.5917	8.63379	10.9138	8.61329	9.4053	8.59533	9.06277	9.27955	8.20036	8.96744	8.85298	9.37739	8.17708	9.35894	2185	CADTK, CAKB, FADK2, FAK2, PKB, PTK, PYK2, RAFTK
OSBPL5	oxysterol binding protein-like 5	-1.78344	-0.834662	5.58e-06	0.000317	7.5012	1	7.21776	6.33959	7.50037	6.53303	7.65953	6.50872	8.09879	7.16946	8.45183	7.12715	8.05416	6.97258	8.31842	6.10255	8.37275	6.40066	8.32647	7.67452	8.62845	7.04211	7.26139	7.23546	7.41405	7.53053	6.83252	7.06699	7.20166	7.2732	7.27146	7.21064	114879	OBPH1, ORP5
NCAPG	non-SMC condensin I complex_ subunit G	-1.78337	-0.834608	7.27e-07	6.28e-05	6.3942	2	6.77047	6.11206	6.8639	6.60953	6.82905	6.19738	7.04722	5.92461	6.83127	6.44918	7.25206	5.56503	7.2345	5.52805	7.24329	6.26955	7.01976	5.5	6.91041	5.70117	6.40844	5.73052	6.53143	5.35863	5.96243	5.41384	5.21241	5.67666	6.21016	6.09049	64151	CAPG, CHCG, NY-MEL-3, YCG1
CMBL	carboxymethylenebutenolidase homolog (Pseudomonas)	-1.78189	-0.833411	0.004123	0.049595	5.7118	2	4.4367	5.29186	5.01417	6.0381	6.99874	5.08002	7.02662	3.78678	6.05454	4.86067	6.97578	5.77974	7.01695	5.82331	6.87632	6.36898	6.02241	5.20778	5.99774	4.64656	4.72269	4.70369	5.93322	4.55564	5.24822	5.21612	4.83449	4.16883	3.7419	3.5682	134147	JS-1
ARID5A	AT rich interactive domain 5A (MRF1-like)	-1.78137	-0.832984	0.002563	0.034373	5.03	2	6.0845	3.67988	5.52408	3.3568	4.14534	4.08676	4.20955	3.99416	5.29926	4.62202	4.41742	3.10382	5.07203	3.0453	4.22256	3.34687	5.04443	4.84093	4.35901	5.13001	6.18575	4.4661	6.32092	5.19583	5.79539	4.63731	6.19283	5.37308	5.91694	5.78939	10865	MRF-1, MRF1, RP11-363D14
NEK2	NIMA-related kinase 2	-1.77949	-0.831463	1.78e-12	1.41e-09	6.4031	2	6.68159	5.95182	7.33534	6.01953	6.8077	6.07664	6.54699	6.0994	6.45179	5.65717	7.01582	6.00123	6.83988	6.57466	6.90022	5.71085	6.78077	6.25497	6.62357	5.73334	6.53412	6.07902	6.70273	5.14573	7.0174	5.62807	6.31827	6.10738	6.79667	5.53668	4751	HSPK21, NEK2A, NLK1, PPP1R111, RP67
CHPF	chondroitin polymerizing factor	-1.77806	-0.830302	0.000147	0.003883	11.1015	1	10.6756	10.963	10.3804	10.7758	12.1663	10.9724	11.3974	10.5585	12.2173	11.0652	11.6808	10.6184	12.3236	9.92538	12.0042	10.0816	11.6866	10.3485	12.3483	10.5643	10.1047	10.4454	10.3611	10.8503	10.5876	10.6774	10.5361	9.88039	10.3272	10.5468	79586	CHSY2, CSS2
DCBLD2	discoidin_ CUB and LCCL domain containing 2	-1.77764	-0.829965	3.93e-05	0.001396	7.4897	1	6.80595	7.22943	7.42843	6.99892	7.98835	7.48052	8.57138	6.82491	8.25978	7.52426	8.20898	6.65134	8.37566	6.51233	8.51115	6.23482	8.2883	7.05608	8.56377	7.20582	6.84256	7.08242	6.94257	6.73749	7.13202	7.01465	7.03412	6.90574	6.4124	6.97053	131566	CLCP1, ESDN
SLMO1	PRELI domain containing 3A	-1.77376	-0.826814	0.001647	0.024763	4.1548	2	4.67023	3.77873	4.87676	2.3791	5.13859	3.35873	4.51579	3.99416	3.61909	3.0674	4.00496	3.63174	4.22335	0.852901	3.94456	2.22335	4.52956	5.15276	4.40896	3.85696	3.83333	3.52994	4.43517	3.61572	5.24822	3.20002	5.28447	4.56367	4.99763	4.3749	10650	C18ORF43, HFL-EDDG1, SLMO1, PRELID3A
RASA4CP	RAS p21 protein activator 4C_ pseudogene	-1.77169	-0.825125	7.8e-05	0.002373	7.9203	1	7.06214	7.66378	7.21696	6.47969	9.23374	6.54818	8.19731	7.77235	9.01248	7.35242	8.82226	7.71888	8.95621	7.16676	8.78384	7.59055	8.34349	7.27799	8.60453	7.37847	7.94372	7.6064	7.24518	7.51581	7.22886	7.39994	7.21094	7.87009	7.79016	7.35685	401331	RASA4P
NRM	nurim (nuclear envelope membrane protein)	-1.77007	-0.823807	5.93e-07	5.31e-05	6.5132	2	6.35744	6.1309	6.5985	6.63415	7.29559	6.02163	6.77817	6.02257	7.5746	6.28132	7.11131	6.3626	7.20821	5.97893	7.46254	6.04742	6.96802	5.85054	7.36736	5.81075	6.1413	5.61879	6.87801	5.84029	5.98479	5.45931	6.15488	6.42512	6.00299	5.78939	11270	NRM29
FAM86DP	family with sequence similarity 86_ member D_ pseudogene	-1.76978	-0.823566	6.22e-05	0.001967	6.3943	2	5.74759	5.74732	6.23602	5.77576	7.44821	6.35403	7.08091	5.10546	7.64137	6.21117	7.65842	5.71861	7.17465	5.97893	7.28627	6.06729	6.66639	6.04438	6.8753	5.82574	5.42533	5.93094	5.75297	6.05908	6.04985	6.01057	5.88048	6.17354	5.97488	5.30409	692099	FAM86D
PHLDB1	pleckstrin homology-like domain_ family B_ member 1	-1.76931	-0.823189	0.000404	0.008357	5.8149	2	4.89772	6.20387	6.09856	5.90279	6.20216	6.24619	6.41584	4.94817	6.89651	6.13744	6.60777	4.37518	6.52537	4.22765	6.56346	5.12703	6.53031	5.83315	6.4315	5.02996	5.09322	3.89221	5.13297	4.7015	6.02849	5.04773	6.03468	5.37308	6.13591	4.2306	23187	LL5A
DLGAP5	discs_ large (Drosophila) homolog-associated protein 5	-1.76739	-0.821621	3.68e-08	5.34e-06	6.8325	1	7.2593	6.73383	7.5689	7.10841	7.37028	7.10172	7.36969	6.51292	7.08421	6.67443	7.52605	6.34922	7.48503	5.92252	7.3397	6.33659	7.31724	5.86773	7.28281	6.00771	6.78592	5.97698	7.08283	5.42314	6.83252	6.18309	6.40164	6.18962	6.82844	6.09049	9787	DLG7, HURP
PKMYT1	protein kinase_ membrane associated tyrosine/threonine 1	-1.76664	-0.821006	9.26e-05	0.002706	7.4448	1	8.63792	7.12057	8.40354	7.60835	7.50898	6.66047	6.99162	7.55496	7.19949	7.27889	6.84852	6.41492	7.51751	5.45038	7.16651	5.16442	7.35801	7.04101	7.80529	6.82048	7.74264	6.91907	8.05334	6.62314	8.58763	7.52816	8.1493	7.16351	7.79821	6.98185	9088	MYT1, PPP1R126
SAP30	Sin3A-associated protein_ 30kDa	-1.76565	-0.820202	3.35e-07	3.3e-05	5.4839	2	5.60985	5.22331	6.09856	5.39851	6.32742	5.18389	5.42216	4.80869	5.8995	4.96665	5.84995	4.93678	6.06515	5.50262	5.75506	5.98609	6.53031	4.48774	6.13764	4.92246	5.18368	5.02914	5.60127	4.51675	5.98479	4.71434	5.28447	4.10244	5.54851	4.93649	8819	-
HELLS	helicase_ lymphoid-specific	-1.76503	-0.81969	5.72e-06	0.000324	5.6228	2	6.58687	5.81876	6.5985	5.0043	6.08286	5.34193	5.60001	5.62534	5.48039	5.71914	5.38327	5.36681	5.4541	4.74395	5.71967	4.63538	5.4231	5.12444	5.80599	3.73516	5.81318	5.31856	6.22036	4.51675	6.75659	5.26815	6.05542	4.87335	6.13591	5.26758	3070	LSH, NBLA10143, PASG, SMARCA6
HOXC13-AS	HOXC13 antisense RNA	-1.76254	-0.817652	0.001705	0.025336	5.9995	2	5.04751	5.50898	5.32714	4.71219	7.05416	4.84675	6.42636	5.78272	7.06812	5.75902	7.06435	5.93111	6.42619	5.18863	7.09235	5.20086	6.98547	5.6466	7.42312	5.98117	5.42533	4.84279	5.89023	5.56332	5.38899	6.01057	4.17701	6.02017	4.37896	4.50606	100874366	HOXC-AS5
CSNK2A2	casein kinase 2_ alpha prime polypeptide	-1.76208	-0.817279	0.000638	0.01192	7.7708	1	7.23348	7.25541	6.87598	7.512	8.84067	7.34519	9.18094	7.16946	9.1828	7.64092	8.53597	8.01846	8.73233	7.38424	8.51889	7.54875	8.3023	6.52788	8.12966	6.73568	7.24047	6.64264	6.89985	7.07524	6.62042	7.0816	6.62622	6.90574	7.20038	7.45754	1459	CK2A2, CSNK2A1
KIF23	kinesin family member 23	-1.76199	-0.817206	3.83e-05	0.001369	6.8661	1	7.24903	6.99255	6.55411	6.9894	6.85008	6.91309	8.18187	6.55717	7.24314	7.12715	7.41065	6.78654	7.6698	6.36491	7.199	5.52214	7.71265	5.66638	7.62154	5.6346	6.29125	5.53919	6.96346	5.40196	6.89288	6.1137	6.83257	6.47844	6.67959	6.02637	9493	CHO1, KNSL5, MKLP-1, MKLP1
SKA3	spindle and kinetochore associated complex subunit 3	-1.76191	-0.81714	7.03e-05	0.002189	5.5489	2	6.68921	4.72519	6.65563	5.63647	5.7882	5.11548	5.8393	5.68639	5.09209	4.22638	5.25531	4.42705	5.54094	5.15638	5.23445	4.20409	5.2316	5.36128	5.18691	4.61237	6.89705	5.31856	5.91188	4.47679	5.84512	5.54616	5.59897	5.40096	6.49392	5.26758	221150	C13ORF3, RAMA1
PHLDB2	pleckstrin homology-like domain_ family B_ member 2	-1.75962	-0.815268	5.66e-05	0.001826	7.3442	1	7.47301	7.33878	7.34405	7.24256	7.68901	7.60425	8.13452	6.97926	8.09088	7.47123	7.57378	6.99852	7.88428	7.16676	7.90603	7.62449	8.12859	5.66638	8.36298	5.71734	7.08484	5.80047	6.85584	6.0039	7.58407	5.96401	7.36011	6.3977	7.42484	6.62574	90102	LL5B, LL5BETA
SLC27A3	solute carrier family 27 (fatty acid transporter)_ member 3	-1.75962	-0.815267	1.22e-05	0.000576	7.0752	1	6.74145	6.85206	6.83946	6.90086	7.62943	6.61164	7.5728	6.88691	8.13016	7.31278	7.53297	6.51418	8.09268	5.88365	7.90996	6.52084	7.6701	6.47279	8.19874	6.23815	6.07193	6.70779	6.89985	6.64134	6.86904	6.2363	7.0955	5.96519	6.49392	6.6401	11000	ACSVL3, FATP3, VLCS-3
LTBP4	latent transforming growth factor beta binding protein 4	-1.75519	-0.811629	0.001658	0.024845	9.9108	1	8.86682	9.95115	8.55011	9.18629	10.2215	10.1438	10.6865	9.44705	10.9568	10.269	9.97463	8.67043	10.7269	7.76183	10.6693	7.66418	10.8014	9.26777	11.5632	9.38467	9.384	9.15672	9.22944	9.48869	9.7284	8.88028	10.4368	9.77245	8.84242	9.55537	8425	ARCL1C, LTBP-4, LTBP4L, LTBP4S
FLJ20021	uncharacterized LOC90024	-1.75484	-0.811342	1.38e-05	0.000629	7.0033	1	6.49422	6.41836	7.02434	6.11008	8.19973	5.82146	7.20833	6.49027	7.68422	6.18213	8.30502	6.26621	7.87595	6.69179	7.55581	7.54166	7.14154	6.73873	7.5342	6.4072	6.92355	6.56438	7.15725	6.77917	6.33733	6.37326	6.43368	6.59166	6.94898	6.21077	90024	-
P2RX4	purinergic receptor P2X_ ligand gated ion channel_ 4	-1.75454	-0.81109	0.000181	0.00452	5.2368	2	4.97456	5.47989	5.25503	4.84468	5.7882	5.08002	4.89491	4.23114	5.80558	5.50131	5.97709	5.46932	5.80934	4.90788	5.996	5.2364	5.63701	5.18053	5.82452	4.0223	4.59664	3.68592	6.66497	4.43568	4.82114	4.27999	5.31919	4.03286	5.65867	3.44281	5025	P2X4, P2X4R
FAM161A	family with sequence similarity 161_ member A	-1.75209	-0.809075	3.22e-05	0.001201	4.1813	2	4.6391	2.88019	5.05721	3.57598	4.3363	3.6762	3.45952	3.62986	4.60448	3.83681	4.47601	3.10382	4.67122	4.22765	4.89694	4.83407	3.54436	3.21689	4.90302	3.29243	4.66104	3.61004	4.75572	3.88367	5.17232	4.17488	4.17701	4.29308	4.68695	3.44281	84140	RP28
RANGRF	RAN guanine nucleotide release factor	-1.75201	-0.809015	0.001854	0.027004	2.905	2	3.91964	2.69009	2.78067	2.59515	4.39472	3.23522	3.08755	3.02008	3.2137	3.0674	3.53942	2.97035	3.084	3.30267	4.36682	2.89183	3.44692	2.7075	3.80877	2.50895	3.29811	1.86304	2.45561	1.52428	2.96665	1.89914	1.53542	2.33467	2.84589	1.9863	29098	HSPC165, HSPC236, MOG1, RANGNRF
PIF1	PIF1 5'-to-3' DNA helicase	-1.749	-0.80653	0.00026	0.005923	5.803	2	5.7181	6.59152	5.9466	5.68441	6.18571	6.12963	6.37296	5.37639	5.93542	6.07561	6.2363	4.32138	6.29491	3.61892	5.90439	4.83407	6.5539	5.45523	7.16419	5.15397	6.18575	4.66671	5.97497	4.89588	6.11211	4.37795	6.17398	5.40096	5.10532	4.68285	80119	C15ORF20, PIF
GCSH	glycine cleavage system protein H (aminomethyl carrier)	-1.74712	-0.804975	2.59e-05	0.001013	7.2913	1	6.91394	6.90772	7.36133	7.37993	8.45784	7.16231	8.12486	6.52411	8.17593	6.99979	8.4976	6.98128	7.87177	7.17483	8.10774	7.13392	7.7074	6.38001	7.50004	6.41713	7.00023	6.61378	7.02438	6.3185	6.95081	6.43145	6.22979	6.8257	6.74765	6.50546	2653	GCE, NKH
CDCA5	cell division cycle associated 5	-1.74664	-0.804585	1.16e-05	0.000557	7.6029	1	8.63003	6.79416	8.35262	6.63415	7.93029	6.67243	7.26805	7.96944	7.5283	7.42239	7.20088	6.44038	7.70313	6.24736	7.23078	6.54939	7.32411	7.10037	7.75307	7.06125	8.04373	7.20998	8.18813	7.01372	8.54312	8.02048	8.18268	7.12223	8.46174	7.36552	113130	SORORIN
ARHGEF39	Rho guanine nucleotide exchange factor (GEF) 39	-1.74613	-0.804162	3.04e-05	0.001151	4.795	2	5.07103	4.39207	4.96981	4.56629	5.23767	4.08676	5.11904	4.57038	4.46398	4.66464	5.41356	3.87524	4.41946	3.95516	4.76427	2.89183	5.28896	3.89041	5.34924	4.80629	5.86877	3.61004	4.84849	4.2105	5.38899	4.00131	5.90354	5.28603	4.94062	5.15214	84904	C9ORF100
HOMER1	homer scaffolding protein 1	-1.74447	-0.802792	0.000315	0.006874	7.2972	1	7.03848	7.23814	7.20744	6.7847	7.97884	7.03847	8.30957	6.86947	8.78775	7.3654	7.79125	7.07367	7.94126	7.40498	7.93718	7.61776	7.91293	6.02919	8.14079	6.48483	6.74194	6.48163	6.72737	5.7256	7.00651	6.20994	6.41775	5.82813	6.64432	6.52106	9456	HOMER, HOMER1A, HOMER1B, HOMER1C, SYN47, VES-1
KIFC1	kinesin family member C1	-1.74386	-0.802288	2.2e-08	3.72e-06	7.6769	1	8.48654	6.99255	8.11359	7.84295	8.01187	7.19583	7.78391	7.70018	7.80078	7.72387	7.81413	7.15282	8.08186	6.77909	8.03401	6.02726	8.10482	7.43035	8.07269	6.4368	8.25146	6.93471	8.29088	6.72048	8.11678	7.46825	7.40121	7.48993	7.86101	7.21064	3833	HSET, KNSL2
C9orf89	chromosome 9 open reading frame 89	-1.74225	-0.800951	3.95e-07	3.79e-05	9.0632	1	8.74964	8.63405	9.03766	8.86602	10.2032	8.3704	9.11416	8.30732	9.81774	8.69754	10.0692	8.5233	9.73754	8.47777	9.59835	8.8703	9.8453	8.376	9.52835	8.29283	9.35995	8.62455	8.65747	8.873	8.26573	8.10158	8.90247	8.79789	8.89214	8.82723	84270	BINCARD, CARD19, BA370F5.1
RNF152	ring finger protein 152	-1.74196	-0.800714	0.002692	0.035776	3.8434	2	3.43089	3.45919	3.2939	3.76621	4.79251	3.76819	3.45952	3.85927	5.09209	4.43772	4.08242	2.47461	4.55083	2.89705	4.53914	3.34687	5.34412	3.41694	4.83155	1.97546	4.13487	2.30936	3.18171	2.85893	3.42477	3.39981	2.93463	3.42041	4.46234	4.44197	220441	-
ORC1	origin recognition complex_ subunit 1	-1.7416	-0.800414	6.39e-06	0.000354	5.3638	2	5.84631	5.4502	5.99168	5.14801	6.45645	5.42906	5.63672	4.94817	5.55156	5.54758	5.95666	4.70431	6.23105	4.50878	5.64617	5.08865	5.86157	4.90892	5.72942	3.60213	5.34919	5.05799	5.37048	4.39337	4.96303	4.78747	5.05652	5.34464	5.76101	3.68356	4998	HSORC1, ORC1L, PARC1
FSCN1	fascin actin-bundling protein 1	-1.73928	-0.798488	2.68e-07	2.77e-05	12.5324	1	13.0108	11.7759	12.2388	11.6973	13.4877	11.9829	13.2413	12.6766	13.2342	12.5624	12.7391	11.5997	13.2766	11.2462	12.9192	11.2448	12.7387	12.0782	13.0138	11.6182	12.778	11.9337	12.6461	12.3687	12.1867	12.4374	12.3773	12.0428	12.698	12.6269	6624	FAN1, HSN, SNL, P55
ZAK	sterile alpha motif and leucine zipper containing kinase AZK	-1.73835	-0.797722	1.15e-07	1.41e-05	8.9047	1	8.6977	8.56994	8.79226	7.98372	9.85998	8.71187	9.82048	8.89293	9.69737	8.83216	9.47779	8.35943	9.50621	8.44143	9.24705	8.32314	9.41558	7.91669	9.58241	8.18065	9.07093	8.19215	8.40219	7.90648	8.83227	8.32986	8.44881	8.73902	8.94382	8.71984	51776	AZK, MLK7, MLT, MLTK, MRK, MLKLAK, PK
TMEM53	transmembrane protein 53	-1.73633	-0.796039	0.00092	0.015853	6.1859	2	5.7181	5.6198	5.87624	5.14801	7.53519	5.84277	6.92639	5.87303	7.19208	5.32654	7.26873	6.16293	7.00172	5.99725	7.33386	6.14416	6.54215	6.24184	6.8484	5.96771	5.59976	5.43309	5.51899	5.7593	5.05042	5.76111	4.45194	4.83297	5.82542	4.68285	79639	NET4
RACGAP1	Rac GTPase activating protein 1	-1.73597	-0.795743	4.29e-15	1.14e-11	8.2942	1	8.81203	7.59762	8.75353	8.17205	8.58873	7.89694	8.87008	8.12455	8.57081	8.02718	8.75879	7.72407	8.77326	8.2369	8.71362	8.22481	8.4064	7.7083	8.77851	7.52349	8.23039	7.83609	8.75056	7.45024	8.72678	7.78186	8.28283	7.06237	8.46174	7.79556	29127	CYK4, HSCYK-4, ID-GAP, MGCRACGAP
TMSB10	thymosin beta 10	-1.73582	-0.795621	1.19e-06	9.53e-05	14.7127	1	14.5167	14.074	14.9575	13.7231	15.9335	13.8354	14.548	14.6553	15.2019	13.5546	15.8103	14.0547	15.4311	14.3077	15.1601	14.8782	15.2554	14.3297	14.9947	14.258	14.7975	14.6622	14.6952	14.1397	14.4834	14.2227	13.9208	14.4364	14.9556	13.8526	9168	MIG12, TB10
GGT7	gamma-glutamyltransferase 7	-1.73491	-0.794857	0.000714	0.013041	7.6725	1	7.25417	6.41836	7.11879	5.94276	8.24807	6.11218	8.11839	7.39956	8.57651	6.77511	8.49406	6.93724	8.46997	6.10255	8.60628	6.0869	8.16734	7.34702	8.59647	7.82904	6.51682	7.4895	7.47352	7.91399	7.68311	7.32823	8.43305	7.55963	6.67959	8.12132	2686	D20S101, GGT4, GGTL3, GGTL5, DJ18C9.2
SMC2	structural maintenance of chromosomes 2	-1.73355	-0.793726	6.2e-17	3.7e-13	7.5215	1	7.85812	7.16693	8.00237	7.11717	8.05779	7.16231	8.10862	7.47647	7.92212	7.47722	7.98524	7.08179	7.96108	7.00415	7.5856	7.17114	7.41709	6.94711	7.63209	6.94931	7.75744	6.90326	8.08705	6.82764	7.93926	7.30973	7.56928	6.49147	8.01393	6.69612	10592	CAP-E, CAPE, SMC-2, SMC2L1
ARRB1	arrestin_ beta 1	-1.73205	-0.792477	0.002149	0.03018	5.7678	2	4.57474	5.11396	5.72429	5.79773	6.51029	5.11548	6.25984	4.11751	7.46212	5.32654	6.42655	6.13201	6.64781	5.22017	6.15018	5.55066	6.83954	5.88471	6.8753	5.02996	5.63225	5.114	4.84849	4.95526	4.77056	5.60803	4.17701	5.09439	5.20552	4.07025	408	ARB1, ARR1
MND1	meiotic nuclear divisions 1	-1.72928	-0.790172	7.24e-05	0.002232	4.8974	2	5.16146	5.03617	6.0778	5.27869	5.6749	4.51623	4.66543	4.65427	4.73251	4.16833	5.07754	4.97213	5.38535	4.40281	4.92828	4.05281	3.87918	3.59261	5.42403	4.38828	5.78455	3.9549	5.57437	3.94354	5.54759	4.11931	4.5132	5.09439	5.50984	3.79037	84057	GAJ
CDT1	chromatin licensing and DNA replication factor 1	-1.72854	-0.789554	2.17e-07	2.3e-05	7.3844	1	8.48873	7.04314	7.95763	7.17704	7.87493	6.63627	7.10076	7.35011	7.33341	7.22295	7.433	6.67298	7.79434	5.97893	7.5151	6.67127	7.00272	6.89777	7.64778	6.2604	7.96938	6.7526	7.95767	6.62314	7.82618	7.58567	7.52535	6.76261	7.97187	7.44941	81620	DUP, RIS2
KIF20A	kinesin family member 20A	-1.7272	-0.788431	1.95e-06	0.000142	6.7515	2	6.9961	5.69766	6.99143	7.15169	7.16741	6.24619	7.52953	6.20052	7.06001	6.68482	7.49097	6.1932	6.97078	6.0683	7.08541	5.87772	7.01976	5.96675	7.10481	5.70117	7.73518	5.57954	7.139	5.7593	6.75659	6.78394	5.99228	7.08833	6.96336	6.28572	10112	MKLP2, RAB6KIFL
PROCR	protein C receptor_ endothelial	-1.72602	-0.787447	1e-06	8.17e-05	8.5985	1	8.31	8.02261	8.38677	8.32355	9.50137	7.92219	9.27855	8.19627	9.51651	8.31159	9.5409	7.84817	9.48035	8.28617	9.2778	8.60051	9.18574	7.77358	9.04455	7.9707	8.31288	8.12558	8.04356	8.23472	8.22874	7.75019	8.26513	8.06134	8.29549	8.39538	10544	CCCA, CCD41, EPCR
TMEM191A	transmembrane protein 191A (pseudogene)	-1.72253	-0.784525	0.001883	0.027302	8.123	1	7.31454	8.20253	8.10336	7.6512	9.72703	7.78027	8.36806	7.18364	8.82174	6.98305	9.57313	8.11254	8.96212	8.20179	8.95341	8.96604	8.55992	6.74804	8.34385	7.15922	7.3224	7.52092	7.55148	7.09517	7.6555	7.19346	7.30054	6.83595	7.42484	6.66838	84222	TMEM191AP
CKS1B	CDC28 protein kinase regulatory subunit 1B	-1.72233	-0.784358	2.8e-08	4.61e-06	8.9308	1	9.26247	8.70175	9.54062	8.63546	9.70411	8.36304	8.78473	8.40136	9.2733	8.18556	9.80647	8.34939	9.56308	8.76654	9.49877	9.0052	9.43318	8.53236	8.92733	8.53105	8.51371	8.79058	9.18788	8.32472	9.26566	8.28637	8.32615	7.36808	9.30453	8.31268	1163	CKS1, PNAS-16, PNAS-18, CKSHS1
LEPRE1	prolyl 3-hydroxylase 1	-1.72102	-0.783264	0.001682	0.025071	6.8273	2	5.64162	6.69639	6.13919	7.31288	7.42737	7.10172	7.15871	6.12902	7.78118	7.0327	8.00527	6.1932	7.90898	5.94157	7.82924	6.10624	7.74375	6.01383	8.05319	5.85528	5.72555	5.63802	6.36869	5.70844	6.15218	5.94815	6.49571	6.2368	5.62288	6.00435	64175	GROS1, LEPRE1, OI8, P3H1
USP18	ubiquitin specific peptidase 18	-1.72079	-0.783072	1.2e-05	0.000569	6.4063	2	7.20718	6.68369	6.23602	6.89068	6.51029	6.19738	6.44718	5.62534	6.33562	5.4776	6.87052	5.87619	7.16784	6.66911	7.05023	5.85503	6.89601	5.99831	6.88416	5.85528	5.78455	5.45494	6.27151	5.33647	6.89288	5.50338	7.20166	5.67666	6.96336	4.84032	11274	ISG43, UBP43
UBE2S	ubiquitin-conjugating enzyme E2S	-1.72068	-0.782977	4.21e-09	9.55e-07	9.9031	1	10.3475	9.62229	10.3231	9.49937	11.2489	9.49142	9.90849	9.74962	10.0719	9.50084	10.4303	9.66191	10.5576	9.50165	10.2644	9.86875	9.85483	9.07592	9.96499	8.95594	10.1601	9.31894	9.89741	8.85947	10.1931	9.5475	9.52133	9.59671	10.181	9.08764	27338	E2-EPF, E2EPF, EPF5
TAGLN2	transgelin 2	-1.72029	-0.782648	0.001586	0.024227	12.1568	1	11.4056	11.7514	11.6275	12.0055	13.6701	11.7197	12.9233	11.4521	13.2133	12.0856	13.2265	12.1059	13.2078	12.3164	12.9927	12.3249	12.7134	11.1984	12.6577	11.0435	11.4212	11.2109	11.3442	11.2495	10.978	11.3136	10.8454	10.817	11.2333	11.3042	8407	HA1756
WDHD1	WD repeat and HMG-box DNA binding protein 1	-1.71982	-0.782255	9.16e-08	1.16e-05	5.8388	2	6.66623	5.53749	6.30906	5.70779	5.47278	5.51123	6.49795	5.35148	5.61938	5.9434	6.45595	5.07326	6.29491	5.28126	5.90439	5.2364	6.08851	5.28657	6.03003	5.6346	6.55121	5.19415	6.87801	4.51675	5.79539	5.45931	5.92624	5.22494	5.7277	5.78939	11169	AND-1, AND1, CHTF4, CTF4
EDARADD	EDAR-associated death domain	-1.71754	-0.780342	0.00123	0.019807	6.7982	2	6.5286	6.65795	6.58385	6.59706	7.95477	6.5611	7.60558	5.64597	7.83922	6.63211	7.433	7.20575	7.90079	6.52501	7.37425	7.49106	7.29641	5.7614	7.17866	4.97721	6.80029	5.4109	6.7151	5.77587	5.79539	6.32495	5.48126	5.28603	6.66206	5.56705	128178	ECTD11A, ECTD11B, ED3, EDA3
TTL	tubulin tyrosine ligase	-1.71629	-0.779295	1.59e-05	0.000704	7.541	1	7.36774	6.89676	7.29095	6.77366	7.90036	7.19583	8.634	7.44737	8.81452	7.4409	7.88611	6.82572	8.14906	6.96744	8.16478	6.40066	8.36031	7.10762	8.38187	7.3108	7.40933	7.01781	6.67767	6.91248	7.31079	7.25276	7.07533	6.84613	7.0195	7.51318	150465	-
NAT6	N-acetyltransferase 6 (GCN5-related)	-1.7152	-0.778374	3.65e-05	0.001325	6.4099	2	6.33819	5.22331	6.5985	4.71219	7.11624	5.34193	6.64034	6.08436	7.05185	5.59242	7.12968	5.19793	7.37705	5.08964	6.38292	4.96696	6.54215	6.35585	6.52507	6.08453	7.00023	6.09302	6.36869	6.59542	6.69011	6.62343	6.69393	6.68535	6.66206	6.6401	24142	FUS-2, FUS2
FKBP1B	FK506 binding protein 1B_ 12.6 kDa	-1.7144	-0.777701	0.001896	0.027429	7.618	1	6.56218	7.02312	7.1086	7.32048	8.96155	7.00104	7.704	6.6315	8.75295	6.82294	8.93096	7.38692	8.57916	7.71832	8.57443	8.0758	8.55992	7.21895	8.09193	7.13534	6.11854	7.33309	6.99424	6.81166	6.78234	6.38508	6.79606	6.45202	6.79667	6.76323	2281	FKBP12.6, FKBP1L, OTK4, PKBP1L, PPIASE
C11orf82	DNA damage-induced apoptosis suppressor	-1.71397	-0.777345	1.03e-05	0.00051	4.634	2	5.5937	3.77873	5.46138	4.01146	4.14534	4.51623	4.70053	4.69445	5.02699	4.0447	4.78491	3.79855	4.70922	4.09783	5.07554	3.97077	5.01073	4.13714	4.45724	4.50467	5.30956	4.33082	5.33885	2.85893	5.48623	4.55593	5.13657	4.61219	4.19618	4.84032	220042	C11ORF82, NOXIN, DDIAS
PET112	glutamyl-tRNA(Gln) amidotransferase_ subunit B	-1.71315	-0.776653	0.000124	0.003361	8.3693	1	8.12855	7.64425	8.35693	8.2418	9.56794	7.57907	8.90999	7.70018	9.53711	7.75871	9.54433	8.21936	9.46794	8.08672	9.19162	8.14757	8.37363	7.7872	8.53312	7.8512	7.51765	7.97491	7.68325	8.08325	7.79488	7.87707	7.32637	7.62612	7.92119	7.81467	5188	HSPC199, PET112, PET112L, GATB
SCARB1	scavenger receptor class B_ member 1	-1.71048	-0.774402	1.18e-05	0.000563	8.1129	1	8.36336	7.013	7.93473	7.01775	8.90489	6.58659	8.65429	8.19277	9.06004	7.33274	8.3566	7.27107	8.68544	7.11736	8.91285	6.47694	8.0353	8.13469	8.34063	7.8512	8.16527	7.75913	8.00378	8.0011	8.21934	7.98982	8.49889	7.88497	8.21363	8.5325	949	CD36L1, CLA-1, CLA1, HDLQTL6, SR-BI, SRB1
BRIP1	BRCA1 interacting protein C-terminal helicase 1	-1.7095	-0.773576	7.08e-05	0.002196	4.2082	2	4.57474	3.45919	4.29233	4.08475	4.45087	4.15651	5.19485	4.17545	4.00447	4.10784	4.22588	4.14676	4.16985	3.0453	4.57919	3.34687	3.72146	3.89041	5.34924	3.79735	4.52923	3.25892	5.01784	2.42716	4.77056	3.57527	4.78567	4.61219	4.61589	4.30455	83990	BACH1, FANCJ, OF
ECI2	enoyl-CoA delta isomerase 2	-1.70944	-0.77352	0.000129	0.003468	7.0753	1	6.95876	6.68369	6.68337	7.03634	8.30629	6.46815	7.62398	6.42011	8.00051	6.54354	8.04451	7.22053	8.03401	7.05751	8.05901	7.22521	7.53439	6.20175	7.24205	6.36676	6.60131	6.62347	6.38426	6.41683	6.33733	6.24931	6.3522	6.07312	6.94898	6.02637	10455	ACBD2, DRS-1, DRS1, HCA88, PECI, DJ1013A10.3
ZMYND15	zinc finger_ MYND-type containing 15	-1.70905	-0.773195	0.003764	0.046352	4.2973	2	3.27759	3.45919	3.77843	3.93425	4.8769	3.93625	4.76828	3.92829	4.85009	3.76027	5.52874	2.82325	4.37288	2.33074	5.30778	4.20409	5.01073	5.03599	6.10771	3.79735	4.22284	3.52994	3.66245	4.10956	3.87129	3.30337	3.10349	4.65913	4.54116	3.79037	84225	SPGF14
CTXN1	cortexin 1	-1.70839	-0.772641	0.001393	0.02188	7.0098	1	6.78477	5.64622	7.15886	4.51418	7.95477	5.45697	6.96299	7.20466	7.46212	6.30845	7.08332	5.34	7.77207	4.02825	7.23705	5.90005	7.04495	7.27155	7.1569	6.57634	7.72768	7.13751	6.86697	7.19092	7.31961	7.05962	7.57647	7.29565	7.86867	6.82735	404217	CTXN
MFI2	antigen p97 (melanoma associated) identified by monoclonal antibodies 133.2 and 96.5	-1.70812	-0.772407	0.000143	0.003785	6.6621	2	6.54549	5.6198	6.724	5.58687	7.01745	6.02163	5.87046	6.45562	7.73096	6.43694	6.7211	5.71861	7.29197	4.69988	6.8923	5.27109	7.06151	6.41551	8.05319	6.98981	7.04918	6.68023	6.51737	7.02762	6.82014	6.48739	7.03412	5.92734	6.73093	6.00435	4241	CD228, MAP97, MTF1, MTF
ZNF599	zinc finger protein 599	-1.70683	-0.771323	0.00049	0.009685	3.7659	2	3.43089	3.19855	4.1405	3.09825	3.84365	3.76819	4.66543	3.5445	4.85009	3.59383	4.58649	2.65944	3.9335	3.52101	4.92828	4.05281	3.80248	3.95616	4.83155	2.50895	3.5904	3.44514	4.55012	3.19081	2.77469	3.6556	3.10349	3.71513	3.86957	2.79168	148103	-
PLCD4	phospholipase C_ delta 4	-1.70638	-0.770941	0.001209	0.019579	4.7458	2	4.97456	5.15134	5.80227	3.23331	3.92519	4.66723	4.89491	4.05716	4.46398	4.70603	4.63871	4.20734	5.07203	3.30267	4.61815	3.69229	4.43109	5.45523	5.60636	3.96926	5.75535	3.9549	5.49049	2.97824	5.79539	4.37795	5.21241	5.16114	4.99763	3.30547	84812	-
FHOD3	formin homology 2 domain containing 3	-1.70178	-0.767047	0.002772	0.036651	4.8746	2	4.60727	4.26142	4.21841	4.9267	4.8769	5.00638	5.11904	3.85927	6.38841	5.71914	5.07754	3.33861	5.49817	4.1642	5.75506	1.90778	5.72276	4.44258	5.99774	3.9142	4.89325	3.52994	4.707	4.80196	4.48707	4.06152	5.4186	4.7046	4.09531	4.98228	80206	FHOS2, FORMACTIN2
FAM169A	family with sequence similarity 169_ member A	-1.70014	-0.765654	3.86e-05	0.001375	5.2764	2	5.38435	5.47989	6.29114	5.36948	6.08286	5.58897	6.0849	4.05716	5.52822	4.82353	5.52874	4.97213	6.1226	5.22017	5.46567	5.16442	5.01073	4.53154	5.56289	4.71259	4.59664	4.70369	5.13297	3.68752	5.74389	4.67634	4.97176	4.40747	6.05764	4.44197	26049	SLAP75
POC1A	POC1 centriolar protein A	-1.69974	-0.765316	2.15e-05	0.000881	6.2078	2	6.30881	5.47989	6.53901	6.53303	7.07218	5.82146	6.40524	5.64597	6.7828	5.73922	7.29337	6.2519	7.15413	6.16871	7.05023	6.14416	6.31249	5.45523	6.7741	5.54682	5.78455	5.73052	6.25466	5.5049	6.30215	5.72433	5.28447	4.9881	5.62288	5.19165	25886	PIX2, SOFT, WDR51A
CDC25A	cell division cycle 25A	-1.69929	-0.764932	1.03e-05	0.00051	5.574	2	6.25848	4.82109	6.65563	5.73081	5.89325	5.18389	5.69009	5.24728	5.50451	6.09132	5.55615	4.82523	5.64263	4.94611	5.82335	4.83407	5.47345	5.52188	5.86086	4.74451	5.49765	4.62876	6.39967	4.34978	6.21026	5.72433	5.57043	5.05983	6.34808	4.3749	993	CDC25A2
RAD51AP1	RAD51 associated protein 1	-1.69924	-0.764888	7.01e-05	0.002189	5.9729	2	6.63501	5.88682	7.2728	6.32192	6.1352	5.51123	5.60001	5.76396	6.11844	5.57018	5.91492	5.19793	6.24405	5.69449	6.01071	5.73591	6.33989	5.60622	6.26517	5.51016	6.29125	5.05799	6.27151	2.85893	6.86904	5.29347	5.7078	5.50741	6.43321	5.7634	10635	PIR51
ERVMER34-1	endogenous retrovirus group MER34_ member 1	-1.69614	-0.762258	4.48e-06	0.000275	6.0151	2	6.34785	5.29186	6.68337	5.1134	6.02854	6.07664	6.18745	6.3337	6.349	5.83562	6.85956	4.82523	6.03555	4.74395	6.50228	4.46605	5.98818	5.31191	5.86086	5.92657	6.49932	5.74832	6.13085	5.12001	6.53209	6.01057	6.13553	5.55783	6.96336	6.06944	100288413	-
TRIM47	tripartite motif containing 47	-1.69557	-0.761774	8.3e-06	0.000427	8.0541	1	7.84795	7.31427	7.75033	7.47158	8.77895	7.50747	8.06551	8.22399	9.12175	8.19649	8.48695	7.79488	8.8065	7.09201	8.65861	7.19843	8.45105	7.55229	9.24866	7.21723	8.30786	7.07538	7.44409	7.73496	7.67625	7.52281	8.12006	7.68967	7.74092	7.94178	91107	GOA, RNF100
IRF7	interferon regulatory factor 7	-1.69464	-0.760981	0.001881	0.027295	9.9432	1	10.9882	9.84252	10.0563	8.70102	10.1649	9.23552	8.98309	9.68752	8.8526	8.56321	9.10347	8.56441	9.45262	9.11795	8.99471	9.32914	9.07596	9.47261	9.47658	9.64036	10.8464	9.93119	10.4563	9.8618	10.9384	9.59792	11.4878	9.98888	11.3412	9.53247	3665	IMD39, IRF-7H, IRF7A, IRF7B, IRF7C, IRF7H
KIF2C	kinesin family member 2C	-1.69379	-0.760258	7.3e-09	1.49e-06	7.3989	1	8.00883	6.85206	8.16369	7.20196	7.79584	6.5611	7.33101	7.48222	7.38628	7.2158	7.56705	6.38899	7.61581	6.13601	7.65751	6.19924	7.46764	7.4129	7.7627	6.87195	7.95018	7.01781	8.10125	6.76264	7.78854	7.42307	7.5179	7.23497	7.72413	6.88875	11004	CT139, KNSL6, MCAK
ESCO2	establishment of sister chromatid cohesion N-acetyltransferase 2	-1.6915	-0.758302	0.000304	0.006668	5.5862	2	5.36545	5.4502	6.39545	6.35192	5.87284	5.51123	6.17502	4.69445	5.84389	5.77856	6.42655	4.86338	6.15048	5.52805	6.20239	5.55066	6.13617	4.73253	6.23779	4.77573	5.53249	4.54972	5.67912	2.72886	5.98479	5.10607	5.24889	4.61219	5.34386	4.62629	157570	2410004I17RIK, EFO2, RBS
CCNB2	cyclin B2	-1.69077	-0.757681	7.23e-06	0.000389	7.0516	1	7.43273	6.84066	7.38686	7.41587	7.92038	7.0292	7.50492	6.50164	7.31988	6.92288	8.08271	6.80626	7.71719	7.03107	7.76124	6.56345	7.56953	6.63213	7.44722	6.07201	7.00023	6.28825	6.91065	5.94653	6.74353	6.02576	6.28353	6.22125	6.79667	6.06944	9133	HST17299
E2F7	E2F transcription factor 7	-1.69056	-0.757501	1.27e-05	0.000593	5.26	2	4.97456	5.18777	5.55444	4.96602	5.65113	5.2492	6.25984	4.91455	5.59712	5.9776	5.07754	4.08352	5.56186	3.79681	5.71967	4.73814	5.89889	5.12444	5.98133	4.17063	5.46194	4.23303	5.30651	4.66639	5.82047	4.82269	5.35309	4.65913	5.65867	4.93649	144455	-
ITPK1	inositol-tetrakisphosphate 1-kinase	-1.69006	-0.757076	0.000219	0.005197	7.8497	1	7.35821	6.9294	7.22642	8.01217	8.96155	7.75238	8.3405	6.7975	9.17718	8.02718	8.04934	8.03108	8.54543	7.29078	8.77525	7.13392	8.28478	7.18507	8.78798	7.04852	7.82927	6.87922	7.50948	7.06179	7.21001	7.30973	7.24745	7.33232	7.25986	7.37413	3705	ITRPK1
CDCA2	cell division cycle associated 2	-1.68705	-0.754506	1.44e-06	0.000112	5.7647	2	6.63501	5.3573	6.25463	5.24711	5.97211	5.37156	6.50789	6.11429	5.76623	5.27245	6.18454	4.97213	5.56186	3.87816	5.87252	5.27109	6.03922	5.31191	6.10771	4.95009	6.24998	5.76592	5.77677	4.95526	6.53209	6.04079	6.11592	5.42832	5.79358	5.23011	157313	PPP1R81, REPO-MAN
CXorf57	chromosome X open reading frame 57	-1.68586	-0.753481	4.33e-05	0.001511	5.3922	2	6.28889	4.82109	6.19806	3.76621	5.23767	4.84675	6.35104	5.01316	5.59712	3.97868	5.84995	4.47712	5.73761	5.08964	5.48687	4.63538	5.4231	5.40902	5.3746	5.15397	5.92231	5.36547	6.53143	5.171	5.35506	5.16215	4.92744	5.58239	4.81935	5.26758	55086	-
CCNB1	cyclin B1	-1.6854	-0.753095	1.09e-05	0.000536	9.1055	1	9.4081	9.05724	9.48062	9.35131	9.80987	9.06463	9.43785	8.31056	9.36011	8.73052	10.2894	8.95954	10.0195	9.08192	9.76278	9.04584	9.55654	8.27011	9.28757	8.23502	8.77244	8.27126	9.03343	7.85674	8.98427	8.15437	8.44881	8.3566	8.86175	8.22494	891	CCNB
SLC1A3	solute carrier family 1 (glial high affinity glutamate transporter)_ member 3	-1.68431	-0.752154	0.002104	0.029664	5.9847	2	5.6727	6.32331	5.05721	5.79773	6.23451	6.1639	7.20833	5.13496	7.25029	6.09132	6.93459	5.75965	6.21793	6.23197	7.33386	6.02726	6.63355	5.03599	6.25154	4.38828	5.38776	4.87557	5.67912	4.83395	5.48623	5.10607	5.88048	4.91262	5.10532	4.56743	6507	EA6, EAAT1, GLAST, GLAST1
CREB5	cAMP responsive element binding protein 5	-1.68377	-0.751697	0.002524	0.033959	4.5096	2	3.81209	4.67474	5.64187	3.23331	4.60728	4.61863	5.44304	3.85927	5.57452	4.66464	4.83053	4.82523	4.22335	4.1642	4.49795	4.20409	5.56917	4.53154	5.54065	3.29243	5.22687	4.4224	4.93565	3.37604	3.77194	2.83639	3.10349	4.23229	4.09531	2.984	9586	CRE-BPA, CREB-5
RTKN	rhotekin	-1.68364	-0.751581	1.1e-09	3.45e-07	8.545	1	8.72204	7.92886	8.25894	8.15938	9.17869	7.57907	8.97595	8.34568	9.27855	8.59109	9.18035	8.21199	9.07374	7.96633	9.36914	8.03601	8.78093	7.89171	9.19806	7.94689	8.42376	7.737	8.23184	8.18907	8.55438	8.12645	8.81395	8.23406	8.48186	8.47761	6242	-
BLM	Bloom syndrome_ RecQ helicase-like	-1.6826	-0.75069	0.002573	0.034441	4.5518	2	5.51013	4.51186	5.55444	2.94923	4.70286	3.6762	4.00009	5.07535	4.13378	3.76027	3.42513	3.79855	4.59208	3.61892	3.94456	3.05997	4.2695	4.44258	4.93746	4.3473	5.69511	4.12812	5.27343	2.85893	5.17232	4.63731	4.62844	4.9881	5.9462	4.30455	641	BS, RECQ2, RECQL2, RECQL3
FAM27A	family with sequence similarity 27_ member C	-1.68227	-0.750411	0.00145	0.022645	3.6522	2	3.97055	3.95818	4.49375	2.78303	4.39472	1.81763	3.68659	3.92829	3.78578	1.98297	4.41742	2.47461	3.99632	2.07879	3.74778	3.88378	3.87918	3.50745	3.27439	3.9142	3.941	3.68592	2.86387	2.85893	4.71814	4.06152	4.45194	3.30708	4.61589	2.984	100132948	FAM27A, FAM27A1, FAM27A3, FAM27C
S100A6	S100 calcium binding protein A6	-1.67826	-0.746969	0.000227	0.005345	14.1292	1	13.7519	13.245	14.1799	13.2591	15.4177	13.0145	14.3548	13.7086	14.707	12.922	15.471	13.1203	14.9728	13.3665	14.7986	13.7975	14.5334	13.9338	14.4287	14.0511	13.9678	14.1516	13.8097	14.0133	13.5588	13.7466	12.9757	14.413	13.8032	13.4989	6277	2A9, 5B10, CABP, CACY, PRA
BCAT2	branched chain amino-acid transaminase 2_ mitochondrial	-1.67586	-0.744904	2.37e-06	0.000165	7.5901	1	7.54196	6.68369	8.08268	7.61455	8.7116	7.128	7.59629	6.7975	8.29477	7.37184	8.15621	7.53018	8.39909	7.34186	8.27556	7.79509	7.69153	7.12202	7.88688	6.46581	7.52632	6.85477	7.86077	6.98551	7.25669	7.05962	6.86818	7.35388	7.70713	6.68232	587	BCAM, BCATM, BCT2, PP18
KPNA2	karyopherin alpha 2 (RAG cohort 1_ importin alpha 1)	-1.67537	-0.744479	1.56e-06	0.000119	9.5379	1	9.71661	9.27396	9.83149	9.62446	10.4121	9.28112	10.0766	9.20254	9.81654	9.43466	10.3464	9.59971	10.2784	9.52393	10.2349	9.23564	9.7515	8.43484	9.9344	8.46793	9.47189	8.63416	9.53875	8.24962	9.48935	9.02149	8.91671	9.08466	9.48981	8.56671	3838	IPOA1, QIP2, RCH1, SRP1ALPHA
FBXO5	F-box protein 5	-1.6731	-0.742521	1.02e-06	8.23e-05	5.4944	2	6.16321	5.29186	5.61331	5.42697	5.7882	5.53761	5.87046	4.91455	6.14936	5.37867	5.95666	5.71861	5.95877	5.25103	6.15018	5.16442	6.4191	5.20778	5.91373	5.08085	4.89325	4.90762	5.80019	4.10956	5.48623	4.59719	5.35309	4.40747	5.50984	4.84032	26271	EMI1, FBX5, FBXO31
ZNF704	zinc finger protein 704	-1.67265	-0.742132	0.000942	0.016142	5.5755	2	4.75979	4.72519	6.01369	5.63647	5.62696	5.00638	5.93083	4.98103	6.16457	5.81685	5.84995	4.86338	5.89426	4.02825	6.17652	4.34101	6.1671	6.41551	6.8753	4.42813	6.49932	4.54972	6.28817	5.06716	5.13282	5.16215	4.17701	5.28603	5.58617	5.23011	619279	GIG1
MAD2L2	MAD2 mitotic arrest deficient-like 2 (yeast)	-1.67062	-0.740386	1.54e-06	0.000118	7.5458	1	8.02397	6.73383	7.91732	6.8701	8.38406	6.3088	6.96299	7.12604	8.24911	6.95757	8.23041	6.64039	8.17305	6.10255	8.05901	7.2428	7.8853	7.24549	7.88688	7.37847	7.30235	7.62097	7.3756	7.66998	7.9676	7.55458	7.54748	7.20365	7.554	7.24861	10459	MAD2B, POLZ2, REV7
C14orf80	chromosome 14 open reading frame 80	-1.66853	-0.738575	7.13e-07	6.2e-05	7.1674	1	7.47742	6.60505	7.44473	6.91097	8.34755	6.522	6.64034	7.25255	7.29245	6.79443	7.15679	6.29442	7.37113	5.57759	7.50993	6.04742	7.29641	7.01038	7.72376	6.7593	7.5689	6.95785	7.76287	6.91996	7.75641	7.23979	7.40929	6.81537	7.13835	6.68232	283643	-
CENPN	centromere protein N	-1.66838	-0.738444	0.000127	0.003414	7.18	1	7.26441	7.46289	7.36133	7.42295	8.16238	7.24468	7.58224	6.34637	7.73606	7.31278	7.89687	6.99852	7.73111	6.87138	7.93718	7.14332	7.99708	6.11805	7.7675	6.2269	6.74194	6.42739	6.95305	5.84029	6.79505	6.30017	6.48045	6.22125	7.21247	5.7634	55839	BM039, C16ORF60, CENP-N, ICEN32
PLOD3	procollagen-lysine_ 2-oxoglutarate 5-dioxygenase 3	-1.6678	-0.737948	0.00126	0.02017	7.9167	1	8.08589	7.16693	8.76006	7.01775	8.35124	6.97231	7.70832	7.2458	8.00897	7.51264	7.21814	5.83838	8.45047	5.6255	7.94486	5.37042	8.06022	8.78166	8.39122	7.83276	8.24622	7.62097	8.47674	7.97264	8.60578	7.90609	8.63603	7.79326	8.31244	7.70289	8985	LH3
NCAPH	non-SMC condensin I complex_ subunit H	-1.6666	-0.736912	3.28e-07	3.29e-05	6.2313	2	6.93332	5.81876	6.93486	6.29129	6.87081	5.73291	6.45748	6.49027	6.0215	5.9434	6.13085	5.8191	6.51468	5.67186	6.64118	5.40207	6.39317	6.14649	6.35711	5.56481	7.09653	5.16792	6.97379	5.48489	6.67644	5.89949	5.65441	5.94639	6.21016	5.44155	23397	BRRN1, CAP-H
KIF18A	kinesin family member 18A	-1.66576	-0.736181	7.67e-05	0.002343	5.5922	2	6.40449	4.32822	6.52375	5.36948	5.62696	4.84675	5.52366	5.81952	5.24304	4.82353	5.50079	4.20734	5.71911	4.78671	5.37757	5.08865	5.95313	5.81554	5.64856	5.39423	6.1413	5.34221	5.70416	4.83395	6.89288	4.59719	5.57043	5.74353	6.28077	5.59679	81930	MS-KIF18A, PPP1R99
DBF4	DBF4 zinc finger	-1.66318	-0.733945	6.56e-06	0.000361	6.8673	1	7.45077	5.84181	7.6414	6.29129	7.01745	5.82146	6.81067	7.18364	6.50057	5.75902	7.25206	6.08434	6.69592	6.69179	7.0287	6.64506	6.65553	6.41551	6.7741	6.59397	7.06117	6.70779	7.48078	5.77587	8.06525	6.70119	7.17347	6.86627	7.57288	6.47376	10926	ASK, CHIF, DBF4A, ZDBF1
DSCC1	DNA replication and sister chromatid cohesion 1	-1.66081	-0.731884	7.3e-05	0.002245	5.308	2	6.11876	5.11396	6.273	5.14801	5.10399	5.04367	4.55468	4.61294	5.02699	5.00032	5.68591	3.87524	5.31317	5.18863	5.78961	5.16442	5.65893	5.5	5.44812	3.96926	5.42533	4.77492	5.57437	4.2105	6.26609	5.64785	5.57043	4.51346	6.13591	4.84032	79075	DCC1
PDGFC	platelet derived growth factor C	-1.66061	-0.731709	0.002121	0.029832	5.3521	2	5.0236	5.29186	5.05721	4.66518	6.4701	5.28077	5.65473	3.92829	6.46414	5.61433	5.97709	4.57233	5.89426	4.40281	5.98113	5.52214	6.28456	5.06608	6.27867	5.52861	3.45164	4.93897	5.77677	5.26786	4.71814	4.71434	5.01476	3.0496	4.99763	4.50606	56034	FALLOTEIN, SCDGF
MCM10	minichromosome maintenance 10 replication initiation factor	-1.65897	-0.73029	0.000179	0.00448	5.2947	2	6.10743	5.18777	6.25463	5.77576	5.4175	5.4006	5.74156	4.11751	5.37969	5.4776	5.66087	5.07326	5.86089	4.78671	5.37757	4.63538	5.26057	4.34777	5.47181	4.07346	5.38776	4.23303	5.20491	2.85893	6.04985	5.18939	5.35309	4.9881	5.7277	5.30409	55388	CNA43, DNA43, PRO2249
HOXC13	homeobox C13	-1.65888	-0.73021	0.000638	0.01192	6.941	1	6.83371	6.73383	6.39545	5.90279	8.08909	6.41222	7.44925	7.05837	8.02573	6.98305	6.8922	7.02401	7.6406	6.66911	7.35131	6.18111	7.82356	5.52188	8.18805	6.35647	6.64972	6.33614	7.00435	6.63227	5.63501	6.81924	6.30101	5.94639	6.28077	6.26734	3229	ECTD9, HOX3, HOX3G
DEPDC1	DEP domain containing 1	-1.6585	-0.729876	9.28e-06	0.00047	6.7742	1	7.41445	5.6198	7.80816	5.96234	6.62455	5.86378	6.65831	6.99543	6.71208	6.19672	6.33456	5.89473	6.94712	5.97893	6.91595	5.87772	7.17995	6.68156	6.76454	6.64559	6.48159	6.68023	7.38337	6.3185	7.85073	6.32495	7.39308	6.81537	7.18819	6.7098	55635	DEP.8, DEPDC1-V2, DEPDC1A, SDP35
CDC6	cell division cycle 6	-1.65638	-0.728036	9.12e-05	0.002677	6.5261	2	7.01442	6.07364	6.95776	6.8701	7.05416	6.90298	7.26805	5.97442	6.7224	6.8783	7.25206	6.23745	7.12632	6.57466	7.32799	5.71085	7.17995	5.70514	6.81173	5.58258	6.46365	4.99971	6.59974	5.24425	6.30215	5.60803	6.03468	6.05569	6.03058	5.65449	990	CDC18L, HSCDC18, HSCDC6
DPH3P1	diphthamide biosynthesis 3 pseudogene 1	-1.65617	-0.727849	0.002293	0.031651	3.9277	2	3.69586	3.19855	4.1405	3.57598	5.10399	4.56834	4.20955	3.71046	4.51235	3.76027	3.74398	4.32138	3.57039	3.0453	4.45555	3.79121	2.663	2.98456	5.24307	2.50895	5.13916	3.68592	4.2435	2.72886	4.48707	3.20002	4.09923	4.10244	3.60183	3.30547	100132911	C20ORF143, DPH3B, ZCSL1
CCDC88A	coiled-coil domain containing 88A	-1.65589	-0.727604	4.05e-05	0.001429	7.975	1	8.2951	7.48502	8.40354	6.72864	8.45441	7.52075	8.43733	8.43733	8.28087	7.63557	8.25571	6.62937	8.08186	6.0683	8.28769	6.19924	7.86658	7.58383	8.50181	7.71688	8.60657	7.78092	8.12926	7.34317	8.42546	7.86867	8.25171	8.45632	8.20155	7.61115	55704	APE, GIRDIN, GIV, GRDN, HKRP1, KIAA1212
TPX2	TPX2_ microtubule-associated	-1.65335	-0.725395	8.34e-07	7.07e-05	8.0477	1	8.86345	7.17603	8.56136	7.8999	8.62579	7.69494	8.21563	8.21365	8.3051	8.06347	7.98019	7.12953	8.07096	6.85138	8.35267	6.33659	7.9534	7.63993	8.51898	7.4528	8.58183	7.66383	8.46945	7.35975	8.50882	8.17154	7.86787	7.82448	8.39964	7.8583	22974	C20ORF1, C20ORF2, DIL-2, DIL2, FLS353, GD:C20ORF1, HCA519, HCTP4, REPP86, P100
MB21D1	Mab-21 domain containing 1	-1.65067	-0.723051	1.82e-07	1.97e-05	6.2455	2	6.38585	5.32495	6.19806	5.39851	6.8396	5.82146	7.20222	5.70617	6.85959	6.23964	6.75698	5.31268	6.41474	5.97893	6.91595	5.27109	6.71951	6.10361	6.80242	5.52861	5.94835	6.17431	6.45972	5.84029	6.28423	5.9797	6.05542	6.12421	6.25761	6.39131	115004	C6ORF150, CGAS, H-CGAS
CCNF	cyclin F	-1.65051	-0.722911	7.98e-06	0.000415	6.9473	1	7.19653	6.9294	7.07758	7.29755	7.42737	6.74214	7.37514	6.67231	7.73606	7.19415	7.20088	6.76655	7.25391	6.26259	7.39122	5.49305	7.42989	5.98262	7.9641	5.86982	7.00023	5.97698	7.0144	6.21298	6.98449	6.93642	6.54053	6.09035	7.06021	6.39131	899	FBX1, FBXO1
PCAT6	prostate cancer associated transcript 6 (non-protein coding)	-1.65048	-0.722887	0.000318	0.006891	6.8505	1	5.70312	6.85206	6.11901	5.66064	7.83329	6.38342	7.61481	5.99065	7.7207	6.61047	7.63933	6.54971	7.88012	6.40663	7.38559	6.57738	7.00272	6.42714	7.24892	5.45336	7.1536	5.83421	6.47435	6.65035	6.09166	6.09941	7.01307	7.25038	6.94898	6.75005	100506696	KDM5B-AS1, KDM5BAS1, PCAN-R1, NCRNA-A2, ONCO-LNCRNA-96
NPAS1	neuronal PAS domain protein 1	-1.64997	-0.722439	0.003674	0.045647	5.0115	2	4.50737	4.51186	6.1787	3.57598	5.55193	3.76819	4.55468	4.84485	5.59712	4.0447	5.52874	3.22599	5.49817	3.61892	4.83213	4.20409	4.3254	6.1605	5.27036	4.86554	6.37043	4.23303	5.05725	4.43568	5.09221	4.55593	5.17499	5.65367	5.65867	4.30455	4861	MOP5, PASD5, BHLHE11
SERPINF2	serpin peptidase inhibitor_ clade F (alpha-2 antiplasmin_ pigment epithelium derived factor)_ member 2	-1.64884	-0.721449	0.000546	0.010508	6.0296	2	6.49422	4.51186	6.58385	4.96602	6.20216	4.80392	5.24327	6.2819	5.74614	4.28219	6.48477	5.22748	6.28236	4.65443	6.25278	5.52214	5.84254	6.38001	5.96472	6.2604	6.38956	5.80047	6.97379	6.05908	6.48581	5.83196	6.3522	6.12421	7.28297	5.37446	5345	A2AP, AAP, ALPHA-2-PI, API, PLI
MAPK8IP1	mitogen-activated protein kinase 8 interacting protein 1	-1.6488	-0.721413	6.68e-05	0.002099	5.9637	2	5.95143	4.77394	5.96931	4.66518	6.81842	5.28077	6.07156	6.25528	7.11587	5.69878	6.31864	5.16776	6.06515	4.22765	6.02528	4.63538	5.95313	5.98262	6.66527	5.60013	5.86877	6.0216	6.36869	6.05908	6.02849	5.83196	6.38535	5.58239	6.36984	5.98199	9479	IB1, JIP-1, JIP1, PRKM8IP
ZNF775	zinc finger protein 775	-1.64874	-0.721362	0.001634	0.024672	4.2443	2	4.50737	3.67988	3.67168	4.61658	5.65113	2.95109	3.68659	4.52654	5.32657	4.70603	4.41742	3.63174	5.07203	3.52101	4.7291	3.34687	4.82931	4.01905	4.97111	3.60213	4.22284	3.68592	4.84849	3.68752	2.55322	3.57527	3.92984	3.62342	4.61589	4.2306	285971	-
PLK4	polo-like kinase 4	-1.64873	-0.721354	0.000261	0.005929	5.467	2	6.49422	5.25799	5.9466	4.96602	4.79251	4.96809	5.85496	5.6044	5.97047	5.15779	5.71051	4.74575	5.66213	3.30267	5.35468	3.34687	5.9172	5.68589	5.70963	4.80629	6.44548	4.77492	5.95425	4.7015	5.84512	5.39055	5.45027	5.84852	5.38718	5.44155	10733	MCCRP2, SAK, STK18
SH3BGRL3	SH3 domain binding glutamate-rich protein like 3	-1.64858	-0.721228	0.001893	0.027404	11.5465	1	10.7209	11.0803	10.9245	10.7731	13.0844	10.9869	12.0332	11.181	12.5864	11.1752	12.4071	11.7006	12.563	11.6251	12.3347	11.6591	11.6543	10.6896	12.08	10.5367	11.6135	10.7784	11.032	10.7354	10.3702	10.9653	9.97904	11.5258	11.1311	10.2969	83442	HEL-S-297, SH3BP-1, TIP-B1
AP2B1	adaptor-related protein complex 2_ beta 1 subunit	-1.6467	-0.719574	0.000404	0.008356	7.7417	1	8.12855	6.56406	7.58369	7.0547	8.5571	7.04767	8.2065	7.86768	8.33902	7.46521	8.11533	6.03505	8.4672	5.90322	8.18438	5.30497	8.30924	7.59935	8.07269	7.56876	7.75744	7.42454	7.73884	7.95092	7.66245	8.0505	7.85017	7.05361	7.73255	8.03705	163	ADTB2, AP105B, AP2-BETA, CLAPB1
CKAP2L	cytoskeleton associated protein 2-like	-1.64559	-0.718607	5.23e-05	0.001735	5.3814	2	5.88663	4.911	5.39582	5.45488	5.44541	5.58897	6.48794	5.27404	5.70511	5.61433	5.44322	4.37518	5.87767	5.42353	5.60796	5.08865	6.25608	4.90892	5.96472	4.42813	5.53249	4.50852	5.75297	4.10956	5.13282	4.75137	5.35309	3.71513	5.42924	5.50566	150468	-
TMEM198	transmembrane protein 198	-1.64239	-0.715797	0.001217	0.019665	5.7696	2	5.57737	5.03617	5.9466	4.80186	6.51029	4.75978	5.85496	5.7257	6.7224	5.15779	5.68591	4.57233	6.13661	4.34675	6.02528	4.13043	6.69849	5.9015	6.7741	6.21556	4.30575	5.57954	5.0956	5.87145	6.3546	5.29347	6.69393	5.42832	5.38718	5.91274	130612	TMEM198A
TSC22D1	TSC22 domain family_ member 1	-1.63992	-0.713623	2.11e-07	2.25e-05	9.3343	1	8.94845	8.89868	9.65361	8.89687	10.0917	8.92422	10.2846	8.87556	10.0268	8.61302	10.0799	9.25152	10.0205	9.14696	9.91429	8.89553	9.57251	8.92196	9.07775	9.16348	8.8812	9.21711	9.32132	8.77547	9.2725	8.7964	9.16596	8.23018	9.50218	8.98736	8848	PTG-2, TGFB1I4, TSC22
INHBA	inhibin_ beta A	-1.63967	-0.713409	0.003015	0.039146	7.8432	1	6.90743	8.13882	6.724	7.6512	8.77345	7.72968	6.88121	7.93631	8.40136	8.05147	7.71425	6.44038	8.38742	6.83109	8.12813	6.18111	9.11613	6.9144	9.49549	6.427	7.85014	7.24803	7.4952	7.33201	7.9676	7.10324	7.97518	8.06134	7.81417	7.2947	3624	EDF, FRP
DCTPP1	dCTP pyrophosphatase 1	-1.63867	-0.712522	0.000162	0.004197	9.5704	1	9.6292	9.28661	9.98566	9.40595	10.4616	8.98539	9.46617	8.8886	10.2562	8.83916	10.7036	9.18529	10.2585	9.36016	10.2381	9.99215	10.3528	9.04792	9.76612	9.08463	8.26706	9.33523	9.11739	9.08225	9.46769	9.0177	9.2335	7.66113	9.46223	9.11616	79077	CDA03, RS21C6, XTP3TPA
ALOXE3	arachidonate lipoxygenase 3	-1.63856	-0.712428	0.001501	0.023245	6.5115	2	6.0612	6.67088	6.34424	4.51418	7.70641	6.24619	7.79207	6.9711	7.412	6.05973	5.99723	6.2519	7.04694	4.86861	6.46001	4.87974	6.99412	6.11805	7.30276	5.60013	6.81452	6.16108	6.22036	5.88678	5.86936	6.26219	6.09603	6.34124	6.69691	6.5966	59344	ARCI3, E-LOX, ELOX-3, ELOX3
PTK7	protein tyrosine kinase 7 (inactive)	-1.63774	-0.711704	0.004103	0.049434	9.6273	1	8.75146	9.63389	8.66934	9.85403	10.2603	9.62352	10.0799	8.53184	10.5507	10.2551	10.4741	9.09397	10.6774	8.50683	10.4019	8.70886	10.653	8.87598	10.9814	8.97288	8.53104	8.58546	8.68289	9.24873	8.93057	8.64476	9.31532	8.48592	8.60163	9.26713	5754	CCK-4, CCK4
CASP1	caspase 1_ apoptosis-related cysteine peptidase	-1.63765	-0.711627	3.29e-08	4.9e-06	8.9459	1	8.9357	8.05748	9.09816	8.5213	9.56476	8.16575	9.10437	8.75961	9.49561	8.17085	9.82912	8.26283	9.64623	8.75582	9.66615	9.02566	9.16099	8.53774	9.05636	8.45352	8.2927	8.77764	9.32939	8.97336	9.17621	8.37505	8.85001	8.25713	9.08534	8.58538	834	ICE, IL1BC, P45
ADORA2B	adenosine A2b receptor	-1.63734	-0.711351	5.54e-09	1.18e-06	7.7209	1	8.06262	7.28934	8.31765	7.38719	8.33641	7.41088	7.73819	7.60325	8.45493	7.59758	8.24311	7.06551	8.28106	7.26076	8.32055	7.4984	8.16351	7.25205	8.12966	7.19431	7.26139	7.26049	7.95245	7.26319	7.77578	7.46268	7.54014	6.35557	7.44548	7.56676	136	ADORA2
SLC5A1	solute carrier family 5 (sodium/glucose cotransporter)_ member 1	-1.63637	-0.710502	0.000755	0.013604	9.8185	1	8.92283	9.96827	8.56882	9.02575	10.3808	9.85486	10.5915	9.21813	10.9253	9.23349	10.6338	9.80845	10.7691	9.1449	10.6524	9.42853	10.5387	9.15854	10.7611	9.1767	9.15159	9.56109	9.161	9.38318	8.8718	9.25374	9.51385	8.72254	9.68469	9.44525	6523	D22S675, NAGT, SGLT1
HMGN4	high mobility group nucleosomal binding domain 4	-1.63454	-0.708882	1.95e-08	3.4e-06	8.6419	1	8.57145	8.06729	8.84233	8.14232	9.15776	7.73539	8.76621	8.29104	9.39922	8.03532	9.50442	7.88109	9.31616	8.16173	9.25325	8.47221	9.32593	8.50242	8.94859	8.49632	8.12588	8.65083	8.59525	8.36359	8.69323	8.37208	8.53257	7.95248	8.62896	8.15669	10473	HMG17L3, NHC
GTSE1	G-2 and S-phase expressed 1	-1.63436	-0.708729	2.94e-06	0.000193	6.3017	2	6.5286	6.11206	6.44491	6.00071	6.32742	5.94486	6.90398	6.3337	6.83127	6.62133	6.38129	6.03505	6.68642	5.05507	6.5734	5.27109	6.18231	5.86773	7.41091	5.51016	6.66551	5.16792	6.54536	5.56332	6.56213	5.6866	6.7459	6.59166	6.23408	5.91274	51512	B99
MAD2L1	MAD2 mitotic arrest deficient-like 1 (yeast)	-1.63211	-0.706734	0.000366	0.007726	7.8958	1	8.07721	8.31797	8.56136	7.99801	8.22812	8.35194	7.95357	7.08128	8.16462	7.43476	8.77638	7.46344	8.55589	7.93815	8.4718	8.16151	8.30924	6.90611	8.28487	6.90763	7.21923	7.33898	7.85519	6.29571	8.51651	6.7293	7.65332	6.18962	8.007	6.78922	4085	HSMAD2, MAD2
CASC5	cancer susceptibility candidate 5	-1.63142	-0.706131	0.001005	0.017057	4.6176	2	4.97456	3.67988	5.21758	5.1134	3.66529	4.406	5.5813	4.80869	4.73251	4.96665	4.53231	4.01738	4.37288	2.73181	4.95896	3.88378	5.61475	4.84093	4.40896	3.85696	5.69511	3.61004	5.33885	3.94354	4.71814	4.63731	4.62844	3.80136	5.05248	3.79037	57082	AF15Q14, CT29, D40, KNL1, PPP1R55, SPC7, HKNL-1, HSPC105
C16orf59	chromosome 16 open reading frame 59	-1.62805	-0.703144	0.000544	0.010508	5.4564	2	6.34785	4.11775	6.23602	5.0043	6.10052	5.73291	4.83298	5.44866	5.27143	4.96665	4.99981	3.87524	5.60281	4.34675	5.48687	3.34687	5.52211	5.38535	5.62761	5.24603	6.02376	5.43309	6.13085	4.73577	6.19116	5.66735	6.07587	5.74353	5.6936	4.88921	80178	-
LOH12CR1	BLOC-1 related complex subunit 5	-1.62704	-0.702252	0.000897	0.015589	7.7885	1	6.69679	7.69576	6.98029	7.04555	9.04143	7.09285	8.42689	7.31832	8.67009	7.57542	8.87219	7.83863	8.65899	7.3981	8.5317	7.90409	8.51555	7.07099	8.3277	7.19431	7.34217	7.56178	6.91065	7.19092	7.03893	7.14558	7.36011	7.10538	7.23636	7.09036	118426	LOH12CR1, LOH1CR12, BORCS5
CCDC107	coiled-coil domain containing 107	-1.62663	-0.701883	0.002429	0.032967	5.8443	2	4.87117	5.32495	5.36189	5.70779	7.11624	5.04367	6.12422	5.22001	6.90559	5.61433	6.87052	5.9666	6.57765	5.69449	6.62214	6.50636	6.45713	4.76958	6.64457	4.97721	5.09322	5.05799	5.33885	5.70844	5.09221	5.45931	5.57043	4.16883	5.38718	5.11151	203260	PSEC0222
PRIM1	primase_ DNA_ polypeptide 1 (49kDa)	-1.62637	-0.701658	0.000358	0.007597	5.7208	2	6.57046	4.99564	7.04587	5.30959	5.17238	4.406	4.80099	4.84485	5.57452	5.18732	6.21925	5.19793	5.49817	4.82824	5.98113	5.71085	5.20204	5.47779	5.76821	5.81075	5.72555	5.5993	6.48884	5.171	6.42169	5.84914	5.73377	5.16114	6.79667	5.70997	5557	P49
SOCS2	suppressor of cytokine signaling 2	-1.62549	-0.700878	0.000572	0.010946	4.2217	2	4.89772	3.57375	5.39582	3.23331	4.60728	4.51623	3.53925	3.85927	4.13378	3.83681	4.63871	3.33861	4.95039	3.17972	3.8819	3.69229	4.48116	4.13714	4.01638	3.67018	4.30575	4.4224	3.85363	4.59351	5.45454	3.87279	4.38796	3.52548	5.05248	3.98285	8835	CIS2, CISH2, SOCS-2, SSI-2, SSI2, STATI2
CCNA2	cyclin A2	-1.62379	-0.699364	0.000426	0.008684	7.4419	1	7.90468	7.52116	7.67633	8.03547	7.85426	7.48731	7.93894	6.75063	7.92659	7.33933	8.36438	7.20575	7.98838	7.49154	8.15818	7.44623	8.18633	6.54934	7.83301	6.36676	6.53412	6.23872	7.3361	5.84029	7.66937	6.39682	6.59822	6.47844	7.36109	6.56686	890	CCN1, CCNA
KIF4A	kinesin family member 4A	-1.62345	-0.699066	1.21e-05	0.000573	6.3066	2	6.96505	5.4502	6.44491	6.55899	7.10754	5.45697	6.35104	6.69229	6.52435	6.21117	6.60777	5.13694	6.29491	5.80263	6.69684	5.30497	6.32625	5.81554	6.96152	6.13357	6.64972	5.94645	6.84462	4.55564	6.54719	6.16948	6.24793	5.82813	6.64432	6.33948	24137	KIF4, KIF4G1, MRX100
MYBL2	v-myb avian myeloblastosis viral oncogene homolog-like 2	-1.62119	-0.697052	0.002765	0.036578	7.4085	1	7.60374	7.62445	7.3784	8.26563	8.31388	7.61667	7.92787	6.30803	8.24554	7.99414	7.49097	7.33356	8.15939	6.82084	7.9639	6.25229	7.82356	6.47279	8.50469	5.68481	7.17581	5.91526	7.3756	6.20076	6.92792	6.48739	6.79606	6.46529	7.07353	6.30386	4605	B-MYB, BMYB
AUNIP	aurora kinase A and ninein interacting protein	-1.62107	-0.696947	0.003975	0.048279	4.0414	2	4.3624	2.88019	3.87781	4.71219	4.99491	4.08676	4.51579	2.74194	4.77277	4.10784	4.58649	4.42705	4.67122	3.17972	4.53914	4.96696	3.72146	2.54606	5.09835	3.9142	3.71697	2.92493	4.49379	2.85893	4.66375	3.20002	3.39145	3.18408	3.86957	3.30547	79000	AIBP, C1ORF135
TROAP	trophinin associated protein	-1.62059	-0.696519	7.96e-06	0.000415	6.5983	2	6.86096	6.89676	7.13897	6.29129	6.54939	6.86181	6.87354	6.15805	6.61574	6.47335	6.97578	5.25645	6.81396	5.57759	6.51266	6.12532	7.26816	6.58095	7.42918	5.86982	6.92355	5.9618	7.10179	5.80844	6.89288	5.84914	7.0955	6.83595	6.4124	5.3397	10024	TASTIN
ARHGEF9	Cdc42 guanine nucleotide exchange factor (GEF) 9	-1.62003	-0.696017	0.001128	0.018595	6.7152	2	6.09601	5.79534	6.01369	5.36948	7.1335	5.98376	7.72546	6.35892	8.11458	6.71555	7.26873	6.57292	7.40046	6.10255	7.70353	5.94371	7.26101	6.47279	7.58398	6.5036	6.44548	6.40511	6.1492	6.80361	6.26609	6.16948	5.73377	6.49147	5.85657	6.42486	23229	COLLYBISTIN, EIEE8, HPEM-2, PEM-2, PEM2
TRAIP	TRAF interacting protein	-1.61926	-0.695331	2.81e-06	0.000187	5.4038	2	5.5937	4.72519	6.13919	5.24711	6.23451	5.28077	5.19485	5.4949	5.29926	4.93218	5.78192	4.52551	5.64263	4.65443	4.95896	5.37042	4.90464	5.15276	6.0925	5.08085	5.81318	5.08627	6.05501	4.55564	5.51723	5.26815	5.83321	4.91262	6.25761	4.88921	10293	RNF206, TRIP
ORC6	origin recognition complex_ subunit 6	-1.61918	-0.695262	9.03e-05	0.002669	6.2875	2	6.5286	6.57786	6.55411	6.49321	6.38619	6.42641	6.7109	5.22001	6.46414	6.28132	6.945	5.93111	6.72403	6.56241	6.68772	6.25229	7.01976	4.90892	6.64457	5.45336	6.35104	4.70369	6.11226	4.73577	6.90465	5.34283	6.56967	5.84852	6.34808	5.86466	23594	ORC6L
VKORC1	vitamin K epoxide reductase complex_ subunit 1	-1.61906	-0.695154	7.14e-06	0.000386	8.8076	1	8.7874	8.28472	8.92889	8.54746	9.76351	8.12718	8.58553	8.46081	9.68688	8.51744	9.686	8.45623	9.59387	8.73686	9.38617	8.93392	9.06779	8.46055	8.97578	8.3843	8.26706	8.39229	9.08915	8.45643	8.52417	8.45579	8.45273	7.22721	8.92924	8.10589	79001	EDTP308, MST134, MST576, VKCFD2, VKOR
CDK1	cyclin-dependent kinase 1	-1.61736	-0.693645	1.56e-05	0.000698	8.2504	1	8.74416	8.20697	9.02687	8.42933	8.54426	8.17418	8.05199	7.80483	8.21298	7.81182	9.02716	8.06012	8.44485	8.32295	8.50337	8.5971	8.6557	7.2389	8.26805	7.42845	8.21439	7.60151	8.69543	6.75431	8.91319	7.20017	8.00747	7.70653	8.68644	7.12138	983	CDC2, CDC28A, P34CDC2
ARMC9	armadillo repeat containing 9	-1.61539	-0.691883	2.44e-05	0.000966	5.671	2	5.57737	5.03617	6.13919	5.07795	6.53647	5.42906	6.16249	5.07535	6.32212	5.63591	5.99723	5.36681	6.16423	4.78671	6.65998	5.2364	6.18231	6.02919	6.45547	4.89428	5.09322	5.14122	5.77677	5.35863	5.28472	5.48151	4.92744	5.50741	5.50984	5.06971	80210	ARM, KU-MEL-1, NS21
CYP51A1	cytochrome P450_ family 51_ subfamily A_ polypeptide 1	-1.6123	-0.689117	3.74e-09	8.73e-07	10.6746	1	10.8035	10.4604	10.8966	10.1299	11.075	10.4632	11.3145	10.4909	11.3063	10.1671	11.1949	10.244	11.0131	10.367	11.5391	10.2267	11.0729	10.1317	11.3375	10.3651	10.0946	10.5328	10.6866	9.98356	10.6422	10.3621	10.4079	9.7387	10.6542	10.374	1595	CP51, CYP51, CYPL1, LDM, P450-14DM, P450L1
SFXN3	sideroflexin 3	-1.61184	-0.688707	0.000482	0.009564	7.3168	1	6.74145	6.16784	7.1086	5.88238	7.53519	5.58897	7.70832	7.61899	8.19086	7.37184	7.6835	6.94616	8.09985	6.0683	8.10774	6.36898	7.99708	6.72936	8.13338	7.36827	7.72014	6.73484	7.19307	7.44508	7.22886	6.88736	7.34334	7.2732	6.66206	7.48165	81855	BA108L7.2, SFX3
PARP12	poly (ADP-ribose) polymerase family_ member 12	-1.61062	-0.687613	1.31e-05	0.000606	8.7106	1	9.50626	8.40178	8.90552	8.49129	8.77345	8.28344	8.02108	8.46081	8.19086	7.7289	8.77638	7.94919	8.69494	8.53846	8.64924	8.68011	8.69336	7.98916	8.91009	8.56496	8.95048	8.53249	8.72937	8.08325	9.76115	8.20863	9.85881	8.53078	9.56011	7.90064	64761	ARTD12, MST109, MSTP109, ZC3H1, ZC3HDC1
RRM2	ribonucleotide reductase M2	-1.60914	-0.686289	0.001642	0.024705	8.7484	1	9.03621	8.88765	9.1413	9.41663	9.52934	8.76308	9.10601	7.80941	9.20136	9.10399	9.48672	8.53516	9.29289	8.91848	9.4631	8.74941	9.40102	7.27155	9.11773	7.46722	8.08539	7.50005	8.71712	7.14703	8.89559	7.67027	8.05974	7.17163	8.56438	7.74334	6241	R2, RR2, RR2M
RAD51	RAD51 recombinase	-1.60716	-0.684513	1.41e-07	1.64e-05	6.2045	2	6.92689	5.64622	6.87598	5.86168	6.52344	5.98376	6.13709	5.94141	6.13398	5.73922	6.8814	5.71861	6.71472	5.71678	6.13682	6.04742	6.54215	6.24184	6.38233	5.66827	5.89579	5.83421	6.92137	5.0123	6.54719	6.2363	5.92624	6.03804	6.74765	5.44155	5888	BRCC5, FANCR, HRAD51, HSRAD51, HST16930, MRMV2, RAD51A, RECA
DYRK3	dual-specificity tyrosine-(Y)-phosphorylation regulated kinase 3	-1.60707	-0.684434	0.00065	0.012051	4.4566	2	3.91964	3.67988	5.42897	3.76621	4.99491	4.15651	4.80099	3.85927	4.73251	4.28219	4.73781	3.33861	4.32474	3.41597	4.61815	2.70147	5.2316	4.57404	4.30726	4.50467	5.59976	3.89221	4.2435	4.51675	4.87	4.27999	4.17701	5.05983	5.29921	4.2306	8444	DYRK5, RED, REDK, HYAK3-2
ANKRD36B	ankyrin repeat domain 36B	-1.60615	-0.683606	0.001619	0.024515	4.4386	2	4.67023	4.32822	5.32714	4.01146	3.66529	3.93625	4.25748	4.65427	4.41393	3.40564	3.53942	3.54049	4.46459	3.41597	4.86489	3.21054	4.2695	4.73253	4.93746	4.17063	4.22284	3.9549	5.05725	4.25843	5.79539	4.46968	5.0971	4.74867	5.62288	3.44281	57730	KIAA1641
LINC01023	long intergenic non-protein coding RNA 1023	-1.60582	-0.683306	0.00066	0.012222	4.6859	2	4.89772	3.77873	4.96981	4.15449	5.7882	4.28664	3.94261	3.71046	4.60448	3.5028	5.38327	4.47712	5.28828	4.69988	5.10327	5.27109	4.0875	4.57404	3.73236	4.0223	5.38776	4.66671	4.75572	4.63041	5.21077	4.42454	5.59897	3.88272	5.34386	4.07025	100652853	HP07349
OTUB2	OTU deubiquitinase_ ubiquitin aldehyde binding 2	-1.60555	-0.683068	3.25e-08	4.9e-06	7.4439	1	8.00883	7.47031	7.32657	6.62189	7.87493	7.50747	7.98238	7.10384	8.01318	7.35242	7.73238	7.00707	7.55451	7.30556	7.77854	7.13392	8.23092	6.96319	8.26805	6.66239	7.37134	6.56438	7.34409	7.20933	7.2382	7.00701	7.6049	6.62751	7.44548	7.02624	78990	C14ORF137, OTB2, OTU2
METTL5	methyltransferase like 5	-1.60311	-0.68087	1.57e-05	0.000701	8.1978	1	7.91447	7.58402	8.45273	7.81091	9.28097	7.50747	8.33493	7.60852	8.90788	7.9125	9.13789	7.93582	9.06827	8.17789	8.85897	8.53422	8.34687	7.40703	8.20229	7.7007	7.7866	7.79812	8.14306	7.64766	7.98434	7.50666	7.54748	7.93828	8.34026	7.65422	29081	HSPC133
PARVB	parvin_ beta	-1.60173	-0.679627	5.01e-06	0.0003	7.556	1	8.1173	6.69639	7.78914	6.41011	8.64997	6.77578	7.8322	7.91522	7.98346	6.59953	7.93913	7.49416	8.21987	6.94874	7.98641	6.92107	7.48616	7.25858	7.56757	7.33197	7.50015	7.39658	7.02438	7.18473	7.68993	7.58053	7.43326	6.9536	8.08142	7.33054	29780	CGI-56
LRP12	low density lipoprotein receptor-related protein 12	-1.59684	-0.675217	2.24e-06	0.000158	6.8027	1	6.8199	6.87458	7.15886	6.7847	6.96057	7.04767	7.36423	6.34637	7.5972	6.84163	7.12968	6.26621	7.31063	6.29257	7.3043	5.87772	7.6151	6.0743	7.41703	6.2823	6.38956	6.48163	6.67767	5.9755	6.96213	6.0704	6.69393	5.80744	6.69691	6.75005	29967	ST7
CARD10	caspase recruitment domain family_ member 10	-1.59499	-0.673549	0.001934	0.027805	6.8819	1	7.43726	6.43361	6.85173	5.90279	7.6355	6.92313	7.05402	6.76012	7.31988	7.0569	6.03669	5.16776	7.20156	4.65443	6.79363	4.20409	7.44889	7.13627	7.79594	6.64559	6.80029	6.31239	7.03428	6.7119	7.36293	6.7293	7.5179	6.62751	6.94898	7.0693	29775	BIMP1, CARMA3
GRK4	G protein-coupled receptor kinase 4	-1.59432	-0.672944	0.00107	0.017958	4.5765	2	4.57474	4.62247	4.29233	4.08475	4.91732	3.85466	4.80099	4.57038	4.88725	4.86067	4.58649	3.44308	5.21094	2.54517	4.69306	3.34687	5.80371	4.84093	4.67703	4.46691	5.69511	4.07266	4.37407	4.55564	4.82114	3.20002	4.5132	4.46144	5.20552	4.78971	2868	GPRK2L, GPRK4, GRK4A, IT11
IGSF8	immunoglobulin superfamily_ member 8	-1.59346	-0.672163	0.000597	0.011278	8.8981	1	8.24686	8.89868	8.29535	8.66862	10.0401	8.72914	9.44304	8.30732	9.7078	9.07071	9.32083	8.64053	9.75354	8.52273	9.6249	8.59024	9.67288	8.2208	9.83854	8.48456	7.73518	8.39229	8.4912	8.54606	8.42546	8.03557	8.65654	7.7827	8.41018	8.18144	93185	CD316, CD81P3, EWI-2, EWI2, KCT-4, LIR-D1, PGRL
RGS20	regulator of G-protein signaling 20	-1.59025	-0.669252	0.003487	0.043792	7.8909	1	7.32924	8.52793	7.66941	7.15169	9.1106	8.11409	8.59489	7.10384	8.6567	7.32611	8.95947	7.71367	8.47549	8.25605	8.39255	8.28546	8.61982	6.79371	8.29819	6.75147	7.25097	6.95018	7.17527	6.6593	7.44585	6.97606	7.48004	7.10538	7.54446	6.45764	8601	RGSZ1, ZGAP1, G(Z)GAP, GZ-GAP
UBASH3B	ubiquitin associated and SH3 domain containing B	-1.58483	-0.66433	1.98e-06	0.000143	6.8625	1	6.63501	5.99358	7.04587	5.98165	7.15056	6.12963	7.5344	6.92118	7.44975	6.48529	7.03543	6.65134	7.161	6.49953	7.32211	6.25229	7.42989	6.61188	7.52856	6.4072	7.62648	6.38249	6.39967	6.52857	6.86904	6.53063	6.948	5.96519	6.85953	7.39966	84959	STS-1, STS1, TULA-2, TULA2, P70
WDR4	WD repeat domain 4	-1.58463	-0.664144	2.89e-06	0.000191	7.7468	1	8.2129	6.88571	8.15381	7.36529	8.91491	7.08393	7.7508	8.11348	7.84395	7.3654	7.86434	6.70485	8.06364	7.00415	8.08705	6.65823	7.78421	7.40703	7.93456	7.31612	7.84321	7.737	7.6706	7.49595	8.21934	7.83457	7.76458	7.00901	8.17708	7.74334	10785	TRM82, TRMT82
DTYMK	deoxythymidylate kinase (thymidylate kinase)	-1.58394	-0.663522	0.000303	0.006651	9.2234	1	9.47575	9.27819	9.90843	9.55201	10.2593	8.86816	8.95247	8.65404	9.58313	8.71031	10.1423	8.63227	9.86293	9.08192	9.7164	9.45894	9.68762	8.64131	9.40146	8.73347	8.20901	9.06556	9.18566	8.43573	9.31503	8.60738	8.74539	7.29565	9.18995	8.28554	1841	CDC8, PP3731, TMPK, TYMK
TUBA1B	tubulin_ alpha 1b	-1.58387	-0.663452	3.67e-05	0.001328	12.3943	1	12.3631	11.9698	12.4425	12.2961	13.4895	11.9775	12.9986	11.9229	13.0089	12.1517	13.2986	12.3161	13.177	12.3556	13.0355	12.5317	12.5904	11.5862	12.6184	11.6811	12.3283	11.7802	12.0806	11.5926	11.943	11.8992	11.5338	11.7098	12.0594	11.9771	10376	K-ALPHA-1
EXO1	exonuclease 1	-1.58275	-0.66243	0.001145	0.018781	4.9829	2	5.89983	4.67474	5.21758	5.58687	5.26924	5.21691	6.05809	4.77161	5.18454	5.12764	5.22146	5.25645	5.31317	4.98335	5.35468	4.13043	5.78389	4.34777	5.42403	3.67018	5.13916	4.01498	4.65658	3.68752	5.45454	3.87279	4.32102	4.10244	4.37896	4.62629	9156	HEX1, HEXOI
HAPLN3	hyaluronan and proteoglycan link protein 3	-1.58269	-0.662382	0.000996	0.016943	6.3286	2	5.88663	5.81876	6.09856	4.61658	6.88106	6.02163	6.72802	6.29502	6.4141	5.9434	6.62081	5.46932	6.57765	4.55898	6.97718	5.00868	7.31033	6.51703	7.45913	6.03378	6.74194	6.38249	6.38426	6.78736	5.51723	5.91589	6.8205	6.18962	6.05764	5.98199	145864	EXLD1, HST19883
MKI67	marker of proliferation Ki-67	-1.58204	-0.661789	0.00225	0.031283	7.9146	1	8.26737	7.49958	7.21696	8.28908	7.93029	8.32946	8.46311	8.19976	8.41732	8.33157	7.7503	7.39996	8.481	6.46045	8.48767	6.28661	8.59729	6.75729	9.30581	6.86471	8.2825	6.91907	7.98857	6.63227	7.98434	7.53348	7.30054	7.43704	7.45569	7.64	4288	KIA, MIB-, MIB-1, PPP1R105
OGG1	8-oxoguanine DNA glycosylase	-1.58195	-0.661701	0.000243	0.005619	6.6053	2	6.31867	6.30684	6.78928	6.1618	7.40623	5.90489	7.13324	6.22816	7.431	6.46132	7.5603	6.58439	7.57523	6.11938	7.47321	6.06729	7.28235	6.33129	6.88416	6.03378	5.92231	6.64264	6.03542	6.2371	6.04985	6.04079	5.7078	5.92734	6.08421	6.32178	4968	HMMH, HOGG1, MUTM, OGH1
ETV4	ets variant 4	-1.58121	-0.661031	0.000171	0.004352	8.1683	1	7.85474	8.13882	7.74375	7.53179	8.98551	8.21562	8.71133	8.29431	8.80485	8.42439	8.732	6.72571	9.10258	7.40498	8.9515	7.23403	8.73265	7.68909	8.74729	7.63836	7.99459	7.76351	7.21065	7.52073	8.12183	7.91019	8.00214	7.72871	8.00004	7.74997	2118	E1A-F, E1AF, PEA3, PEAS3
FBLN1	fibulin 1	-1.58009	-0.660011	0.001808	0.026499	8.5927	1	7.84795	8.36248	7.76986	8.82651	9.44891	8.45588	8.87393	7.67027	9.3568	8.79188	9.43229	8.34939	9.89728	8.2787	9.4631	8.1335	9.02623	8.18697	9.42137	8.03663	7.5689	8.15925	8.37125	8.25554	7.99539	7.90609	7.91969	7.11383	8.38902	7.68915	2192	FBLN, FIBL1
SUV39H1	suppressor of variegation 3-9 homolog 1 (Drosophila)	-1.57989	-0.659821	0.000188	0.004675	6.5065	2	6.86769	6.16784	6.19806	6.01953	7.49569	6.88254	6.86583	6.12902	7.00191	6.58851	7.05478	6.67298	7.3888	6.47359	7.2118	5.94371	6.87743	5.9015	7.28949	5.60013	6.02376	5.83421	6.03542	5.6377	6.48581	6.27496	5.78435	5.42832	6.34808	5.73693	6839	H3-K9-HMTASE 1, KMT1A, MG44, SUV39H
ZBTB8A	zinc finger and BTB domain containing 8A	-1.57763	-0.657756	7.22e-06	0.000389	5.5879	2	5.83261	4.39207	5.92353	4.9267	5.89325	5.00638	5.63672	5.62534	6.19452	4.96665	5.52874	5.41897	5.86089	5.55303	6.06813	5.16442	5.61475	5.43231	6.20988	5.17754	6.1637	4.84279	5.89023	4.73577	6.09166	5.52493	4.88172	6.07312	6.32599	4.98228	653121	BOZF1, ZBTB8, ZNF916A
PRELID2	PRELI domain containing 2	-1.5776	-0.657735	0.000281	0.006299	5.4745	2	5.42142	4.86674	5.13962	4.61658	5.80983	5.00638	5.09285	4.91455	6.33562	4.70603	6.48477	4.86338	5.92687	4.45676	5.80658	6.0869	5.7638	5.03599	6.44353	4.71259	6.04804	5.34221	6.16732	5.12001	5.13282	5.26815	5.0971	5.53284	4.99763	5.56705	153768	-
SLC43A2	solute carrier family 43 (amino acid system L transporter)_ member 2	-1.57463	-0.655013	0.000462	0.009249	7.4243	1	6.90743	6.89676	7.81445	8.00747	7.42036	6.97231	6.71949	6.56803	8.3051	7.12715	8.1916	7.5711	7.73111	6.53759	8.03401	6.73479	7.56373	7.68909	8.56927	6.89346	7.5435	6.67092	7.92075	7.05502	7.46983	6.8017	6.91433	7.08833	7.58223	5.81491	124935	LAT4
USP28	ubiquitin specific peptidase 28	-1.57358	-0.654049	5.41e-05	0.001769	6.9591	1	6.88769	6.41836	6.62735	6.99892	7.40623	6.64842	8.21563	6.45562	7.46212	7.32611	7.09271	6.54971	7.50136	6.74697	7.41907	6.97467	7.77921	6.60164	7.62682	6.04663	6.53412	6.0216	6.84462	6.20076	6.62042	6.31261	6.89144	6.46529	6.85953	6.5966	57646	-
KDELC1	KDEL (Lys-Asp-Glu-Leu) containing 1	-1.57342	-0.653907	0.000225	0.005315	4.7184	2	5.42142	4.39207	5.25503	4.34552	4.74838	4.88834	4.89491	3.78678	5.35338	4.33592	5.78192	4.32138	5.4541	4.55898	5.30778	4.27417	5.10956	4.61532	4.86773	4.54147	4.66104	4.50852	4.80285	4.63041	5.35506	4.85707	4.09923	3.62342	3.07509	3.88982	79070	EP58, KDEL1
PTTG1	pituitary tumor-transforming 1	-1.57146	-0.652109	1.75e-06	0.000131	8.1433	1	8.52537	7.49232	8.63068	7.78915	8.95671	7.01987	7.64215	8.27125	8.25623	7.78792	8.79663	7.69792	8.65656	7.96167	8.53425	7.92057	8.2199	7.56288	8.25786	7.70881	8.4284	8.25578	8.42872	7.2865	8.46178	7.76385	7.63277	8.25713	8.6108	7.20099	9232	EAP1, HPTTG, PTTG, TUTR1
MIS18A	MIS18 kinetochore protein A	-1.57023	-0.650973	6.25e-06	0.00035	6.6489	2	6.88769	6.47842	6.69704	6.65836	7.20054	6.11218	6.43681	6.30803	6.62677	6.69514	6.97578	6.38899	6.97858	6.18479	7.31619	6.10624	6.98547	6.02919	6.95313	5.95413	7.2085	6.13424	7.31187	5.93182	7.26585	6.46528	6.09603	7.03594	6.87483	4.98228	54069	B28, C21ORF45, C21ORF46, FASP1, MIS18ALPHA, HMIS18ALPHA
CERS5	ceramide synthase 5	-1.56959	-0.65039	3.3e-12	2.2e-09	8.533	1	8.46006	8.17103	8.61636	8.14232	8.89227	8.2559	8.66765	8.11718	9.08624	7.93008	9.19132	7.97556	9.13435	7.80408	9.09134	8.19802	9.0114	8.14177	8.97163	8.35617	8.54391	8.38946	8.65105	8.44093	8.78846	7.90609	8.51395	8.5181	8.45667	8.03162	91012	LASS5, TRH4
ARHGEF1	Rho guanine nucleotide exchange factor (GEF) 1	-1.56959	-0.65039	0.001278	0.020399	10.0488	1	9.90262	9.33004	9.51576	8.74408	10.5422	9.14619	10.556	10.24	10.8109	9.76721	10.011	8.96832	10.3702	8.24842	10.0682	8.41907	10.8688	9.64574	11.0806	9.78357	10.6017	9.58482	9.51595	10.0776	10.009	9.87979	10.2881	10.6286	10.102	10.3126	9138	GEF1, LBCL2, LSC, P115-RHOGEF, SUB1.5
CYB5B	cytochrome b5 type B (outer mitochondrial membrane)	-1.56906	-0.6499	0.000479	0.009531	9.1368	1	8.92121	8.47731	8.72378	8.67456	10.0193	8.60054	10.2947	8.53461	10.0556	8.75291	9.97336	9.17584	9.74442	9.32614	9.85843	9.02312	9.45996	8.66608	9.43349	8.46074	9.17659	8.56802	8.53372	8.54123	8.52417	8.63736	8.12987	9.14362	8.49182	8.39961	80777	CYB5-M, CYPB5M, OMB5
NETO2	neuropilin (NRP) and tolloid (TLL)-like 2	-1.56886	-0.649721	2.79e-06	0.000186	8.04	1	8.51683	7.43285	8.6554	7.31288	8.06231	7.50747	8.37078	8.04131	8.43938	7.45311	8.30502	6.49	8.15595	7.14227	8.32938	6.9101	8.16734	7.8875	8.35345	8.12111	7.95018	8.01959	7.94196	7.75598	8.7334	7.92242	8.39286	7.71766	8.45667	8.31715	81831	BTCL2, NEOT2
HYLS1	hydrolethalus syndrome 1	-1.56771	-0.648659	0.000108	0.003024	5.3573	2	6.01344	4.51186	5.99168	4.80186	5.72129	4.15651	5.14475	4.69445	5.24304	5.63591	6.18454	5.07326	6.00532	4.90788	5.88854	4.96696	4.79011	5.20778	5.21527	4.86554	5.89579	4.87557	5.40143	4.43568	5.57732	4.98694	5.62696	6.07312	5.82542	5.06971	219844	HLS
ASPM	abnormal spindle microtubule assembly	-1.56751	-0.648472	0.000161	0.004179	6.3286	2	6.97132	5.77153	7.30887	6.17863	6.18571	6.0402	6.51777	6.80669	6.05454	6.50888	6.44133	5.41897	6.33191	5.25103	6.8923	5.40207	6.74022	5.58559	6.75492	5.84059	5.56652	5.93094	6.59974	5.06716	7.11184	5.72433	6.69393	6.3977	6.55217	6.47376	259266	ASP, CALMBP1, MCPH5
BRCA1	breast cancer 1_ early onset	-1.56663	-0.647662	1.51e-05	0.00068	6.2831	2	7.02047	5.74732	6.87598	6.337	6.35711	6.05854	6.85808	6.05379	6.19452	6.42459	6.55439	5.46932	6.37982	5.57759	6.26511	5.16442	6.4191	6.01383	6.81173	5.52861	7.10812	5.43309	6.47435	5.38045	6.71707	6.16948	5.7078	6.65093	6.53301	6.11125	672	BRCAI, BRCC1, BROVCA1, FANCS, IRIS, PNCA4, PPP1R53, PSCP, RNF53
SLC26A6	solute carrier family 26 (anion exchanger)_ member 6	-1.56609	-0.647169	0.000855	0.01501	6.8656	1	6.48549	6.57786	5.77674	6.4243	7.28791	6.63627	7.165	6.69229	7.10013	6.63211	7.3176	5.73928	7.41203	5.52805	7.41355	5.30497	7.53439	6.53865	8.21989	6.54949	6.49932	6.30037	6.1492	6.84344	7.15191	6.55178	7.55478	7.12223	6.79667	6.95913	65010	-
PPP1R14C	protein phosphatase 1_ regulatory (inhibitor) subunit 14C	-1.56583	-0.646924	0.000997	0.016961	9.2925	1	9.02421	8.66669	8.60915	8.56997	10.3067	8.93419	9.95375	9.04829	10.3306	9.41763	10.1725	9.14326	9.99569	9.15921	10.0585	9.0052	9.8981	8.66853	9.96499	8.54017	9.05903	9.02778	8.74755	8.56525	8.29733	8.99472	8.40907	8.83669	8.3567	8.83972	81706	CPI17-LIKE, KEPI, NY-BR-81
LOC143666	uncharacterized LOC143666	-1.56249	-0.643849	0.003091	0.039939	5.1282	2	4.57474	5.18777	4.21841	5.0416	6.34234	3.57794	4.39241	4.61294	5.70511	4.89687	5.07754	5.04033	5.49817	4.1642	5.62719	5.08865	5.88035	5.20778	5.89632	3.67018	4.45852	4.12812	5.51899	4.89588	5.28472	4.67634	6.31827	5.16114	4.94062	5.30409	143666	-
DHX58	DEXH (Asp-Glu-X-His) box polypeptide 58	-1.56149	-0.642919	0.000235	0.005499	7.1359	1	8.04193	7.03316	7.14895	7.00836	7.52214	6.84078	6.67605	6.08436	6.60463	6.12223	7.05478	6.53796	7.15413	6.76847	6.98465	6.16275	6.78077	6.89777	7.50004	7.35799	7.39993	6.71687	7.09234	6.92739	8.26573	6.40845	8.21069	7.38912	7.74925	6.56686	79132	D11LGP2, D11LGP2E, LGP2, RLR-3
CHEK1	checkpoint kinase 1	-1.55833	-0.640003	0.002572	0.034441	6.5832	2	7.65911	5.4502	7.49256	5.33984	6.64875	5.4006	6.04449	6.88691	6.2668	5.50131	6.47044	5.87619	6.51468	5.05507	6.5734	5.43304	6.15172	6.939	6.34433	6.4562	7.0371	6.48163	7.03428	6.08589	7.56194	6.71999	6.7459	6.85624	7.45569	6.7098	1111	CHK1
CCDC18	coiled-coil domain containing 18	-1.55604	-0.637877	1.96e-05	0.000822	5.4682	2	5.97656	5.11396	5.46138	4.9267	6.04688	5.00638	5.63672	5.58315	5.29926	5.15779	4.95931	5.41897	5.51972	4.94611	5.95092	4.46605	4.97623	5.23453	5.54065	5.28995	6.20748	5.29452	5.72877	4.66639	6.56213	4.95555	5.90354	5.58239	6.11029	4.98228	343099	NY-SAR-41
FMNL1	formin-like 1	-1.5546	-0.636544	0.000246	0.005669	4.4448	2	3.91964	3.45919	4.36264	3.67422	4.65586	3.23522	5.09285	4.23114	5.12357	4.0447	5.22146	4.26549	5.1009	3.95516	4.69306	3.88378	4.15075	4.73253	4.83155	3.9142	4.52923	4.50852	4.89273	3.88367	4.21179	4.3298	5.05652	4.95085	5.25312	4.2306	752	C17ORF1, C17ORF1B, FHOD4, FMNL, KW-13
TTK	TTK protein kinase	-1.55443	-0.636384	2.56e-05	0.001003	5.9942	2	6.6507	5.90882	6.25463	5.75346	6.1352	5.21691	6.45748	6.11429	6.10273	5.9606	6.78041	5.87619	6.15048	5.45038	6.62214	6.00682	6.22702	5.18053	6.41936	4.92246	6.37043	5.08627	5.89023	4.89588	6.38854	5.86612	5.01476	5.92734	6.32599	5.9362	7272	CT96, ESK, MPH1, MPS1, MPS1L1, PYT
AK1	adenylate kinase 1	-1.55362	-0.635633	0.001477	0.022976	9.0158	1	8.50609	8.56648	8.71373	8.28131	10.447	8.21153	9.24476	9.00501	10.0048	8.56883	9.9017	9.09998	9.78613	8.90641	9.79289	9.23344	9.25214	8.40277	9.29589	8.3009	8.89466	8.69281	8.50195	8.37179	8.40488	8.6324	7.76458	8.64596	8.55491	8.24386	203	HTL-S-58J
C9orf40	chromosome 9 open reading frame 40	-1.55306	-0.635116	0.000103	0.002931	5.8088	2	6.20633	5.18777	6.37858	5.18181	6.66071	4.71425	5.79126	5.83758	6.07078	3.90949	6.28626	5.75965	5.87767	5.57759	6.18951	5.60606	5.52211	5.23453	5.27036	5.71734	5.84124	5.27008	6.30464	5.54411	6.31985	5.81457	6.22979	6.26742	6.30356	5.15214	55071	-
PKM	pyruvate kinase_ muscle	-1.55252	-0.634608	0.002401	0.032656	13.9927	1	13.8187	13.5295	13.5465	14.0152	15.1536	13.6769	14.63	13.3771	14.8095	14.1508	14.7211	14.1871	15.0698	14.0557	14.64	14.1614	14.33	13.248	14.512	12.9566	13.2908	13.1079	13.6486	13.3205	13.113	13.3628	13.0838	12.4909	13.582	13.4546	5315	CTHBP, HEL-S-30, OIP3, PK3, PKM2, TCB, THBP1
PJA1	praja ring finger 1_ E3 ubiquitin protein ligase	-1.55202	-0.634144	0.001072	0.017989	7.7265	1	7.731	7.12057	7.54642	7.29755	8.75685	6.94301	8.26337	7.73431	8.70693	7.6778	7.93913	6.69431	8.42216	7.20668	8.19086	7.15265	8.06022	7.49261	8.39122	7.41364	6.42708	7.57182	8.17923	7.77671	7.21946	7.77288	7.16395	5.67666	7.66376	7.72325	64219	PRAJA1, RNF70
LDHA	lactate dehydrogenase A	-1.55104	-0.633235	0.000226	0.005334	13.5542	1	13.6835	13.2252	13.3772	13.3766	14.363	13.2635	13.6837	12.9247	14.1963	13.5759	14.1923	13.6683	14.2505	13.8083	13.8109	14.01	13.9568	12.6979	13.8439	12.0503	13.6227	12.6774	13.9048	12.9884	12.931	12.5024	13.294	12.2556	13.8805	13.2693	3939	GSD11, HEL-S-133P, LDHM, PIG19
TMEM123	transmembrane protein 123	-1.55011	-0.632371	0.001975	0.028226	11.5778	1	10.9379	11.4082	11.5128	11.2154	12.1399	11.1793	12.226	11.0627	12.5425	11.4598	12.6559	11.6804	12.2558	11.7195	12.4715	11.9428	12.3087	10.8774	12.0664	10.969	10.7899	11.0156	10.8706	10.7274	11.052	10.5906	10.8447	10.171	11.0709	11.0565	114908	KCT3, PORIMIN, PORMIN
RNASEH2A	ribonuclease H2_ subunit A	-1.55001	-0.632282	6.04e-07	5.37e-05	8.344	1	8.82593	7.63768	9.24034	8.09433	8.95429	7.38931	8.17565	8.17867	8.45493	7.76362	8.66433	7.85765	8.73002	7.92864	8.45307	8.35179	8.45105	8.48582	8.05319	7.78368	8.6861	8.06292	8.88256	8.0011	8.55064	8.39273	7.99142	8.02596	8.84242	7.37413	10535	AGS4, JUNB, RNASEHI, RNHIA, RNHL
SSFA2	sperm specific antigen 2	-1.54976	-0.632045	1.78e-05	0.000766	11.2716	1	11.1177	11.1689	11.2054	10.6289	11.7107	11.1496	11.9981	11.0119	12.1941	11.3367	11.9815	10.8391	11.8602	10.906	11.7572	11.1225	11.917	10.5535	11.8339	10.7741	10.5075	10.7999	10.8741	10.52	11.2916	10.7851	10.9523	10.5302	10.989	11.2009	6744	CS-1, CS1, KRAP, SPAG13
SGPP1	sphingosine-1-phosphate phosphatase 1	-1.54969	-0.631975	4.43e-05	0.001536	7.0125	1	7.33896	5.4502	7.88184	5.77576	7.25675	6.27783	6.88121	7.43557	7.04365	6.30845	7.28521	6.14755	6.88208	6.61081	7.3397	6.56345	7.13373	6.81158	7.11236	7.08013	6.81452	7.05406	7.47352	6.80361	7.84463	6.64327	7.41732	6.74096	7.47589	7.00421	81537	SPPASE1
CLSPN	claspin	-1.54945	-0.631753	0.002866	0.037632	6.3376	2	6.9961	6.1309	6.82708	6.65836	6.44267	6.09452	6.12422	6.15805	5.78604	6.49713	5.87193	5.85741	6.00532	4.94611	6.40537	5.37042	5.93527	5.58559	6.81173	5.22356	7.5689	6.12063	6.63923	4.76925	7.34576	6.39682	6.5108	6.91544	7.00567	4.98228	63967	-
ENO1	enolase 1_ (alpha)	-1.54891	-0.631252	3.84e-05	0.00137	14.1364	1	14.2553	13.6581	14.0099	13.8446	15.1381	13.641	14.4375	13.817	14.8367	14.0129	14.7966	14.2935	15.0396	14.1274	14.6676	14.3151	14.1991	13.4451	14.3822	13.2421	13.9427	13.5121	14.1549	13.599	13.6205	13.7826	13.5107	13.0761	14.2791	13.6526	2023	ENO1L1, MPB1, NNE, PPH
STMN1	stathmin 1	-1.54887	-0.631212	3.13e-05	0.001173	9.3218	1	9.4173	8.91507	9.81904	9.39339	9.91341	8.60678	9.06282	9.19205	9.3011	8.87363	10.1758	9.23524	9.62899	9.58729	9.91037	9.63239	9.52407	8.72149	9.37028	8.51263	9.80147	8.85569	9.77719	8.0186	9.47363	8.65944	8.65654	8.96132	9.6955	8.28097	3925	C1ORF215, LAP18, LAG, OP18, PP17, PP19, PR22, SMN
FDX1L	ferredoxin 1-like	-1.54883	-0.631178	1.91e-05	0.000809	7.4729	1	7.58752	6.87458	7.94049	6.47969	8.57931	6.42641	7.29127	7.42367	8.04641	6.50888	8.09211	7.27815	8.03026	6.71412	8.13486	7.26017	7.42989	7.4129	7.72376	7.14733	7.46451	7.38524	7.4515	7.1597	7.51662	7.58053	6.95905	7.35388	7.4039	7.17165	112812	FDX2
RAD54B	RAD54 homolog B (S. cerevisiae)	-1.54763	-0.630061	5.38e-05	0.001763	4.8061	2	5.4396	4.32822	5.77674	4.71219	4.39472	5.00638	5.01132	4.28477	4.36208	4.48605	5.25531	4.42705	5.07203	4.60749	4.989	4.40488	4.43109	4.84093	4.40896	4.42813	5.18368	4.62876	5.77677	4.25843	5.38899	4.11931	5.45027	4.40747	5.05248	4.3749	25788	RDH54
CHRNA5	cholinergic receptor_ nicotinic_ alpha 5 (neuronal)	-1.54733	-0.629781	0.001406	0.022032	5.0711	2	5.65724	4.56822	6.13919	5.45488	4.74838	4.84675	6.03076	4.48132	5.29926	5.24463	5.38327	3.22599	5.33764	3.61892	5.95092	4.73814	4.70838	4.65546	4.83155	5.28995	4.72269	5.114	4.707	4.34978	5.57732	4.92346	5.05652	4.35141	5.58617	4.93649	1138	LNCR2
PPP1R18	protein phosphatase 1_ regulatory subunit 18	-1.54636	-0.628876	0.000325	0.007016	7.8001	1	7.57524	7.59762	7.14895	7.50534	8.38045	7.59799	8.31241	7.36263	8.60467	8.20373	7.72032	7.39996	8.56369	6.96744	8.11456	7.12447	8.58875	6.78469	8.82754	6.95614	7.85014	6.85477	7.54456	7.51087	7.29298	6.93642	7.98602	8.03043	7.60075	7.88867	170954	HKMT1098, KIAA1949
KIAA0101	KIAA0101	-1.54575	-0.628303	0.000108	0.003024	7.8264	1	8.37049	7.75159	8.77302	7.93004	8.23613	7.45307	7.66009	7.05065	7.5746	7.46521	8.28877	7.85292	8.08908	8.00758	8.04478	8.23803	7.8853	7.03341	7.64257	6.82048	8.49616	7.47888	8.24042	6.64134	8.34132	6.97606	7.38491	7.50928	8.07481	6.66838	9768	L5, NS5ATP9, OEATC, OEATC-1, OEATC1, PAF, PAF15, P15(PAF), P15/PAF, P15PAF
C21orf58	chromosome 21 open reading frame 58	-1.54568	-0.628241	0.001501	0.023245	5.2794	2	5.49282	5.29186	5.61331	4.66518	4.14534	5.15009	5.87046	4.73355	5.18454	5.9434	5.0392	3.87524	5.15697	4.09783	5.28375	4.40488	6.08851	4.94175	6.23779	4.92246	5.46194	4.77492	4.84849	5.24425	6.21026	4.55593	6.13553	5.37308	5.76101	5.06971	54058	-
LY6E	lymphocyte antigen 6 complex_ locus E	-1.54501	-0.627615	4.51e-05	0.001552	11.2323	1	11.5858	11.4039	11.0275	11.263	12.2419	10.8897	10.8759	10.3612	11.4188	10.7033	11.7503	10.7617	12.0687	11.0912	11.6328	11.1829	11.4592	10.8474	11.726	10.9652	10.4425	11.0303	11.1043	10.8793	11.6115	10.9399	11.336	9.88039	11.5551	10.1479	4061	RIG-E, RIGE, SCA-2, SCA2, TSA-1
ZNF296	zinc finger protein 296	-1.54386	-0.626542	0.000789	0.01411	6.5362	2	6.61114	5.69766	6.0778	6.53303	7.23292	5.75556	7.14603	5.64597	7.13916	6.50888	7.08332	7.05731	7.16784	6.71412	7.13327	6.30346	6.87743	5.40902	7.26935	4.83622	6.38956	5.5993	6.50317	5.91696	6.60607	6.01057	6.24793	6.99077	6.28077	6.13171	162979	ZFP296, ZNF342
PFKFB4	6-phosphofructo-2-kinase/fructose-2_6-biphosphatase 4	-1.5422	-0.624988	0.002618	0.034919	8.5333	1	8.73683	8.70804	7.95194	8.38287	9.03226	8.86295	8.75164	7.5604	9.17718	8.85764	8.82789	8.43104	9.35263	8.30468	8.81981	8.80077	8.88457	7.23228	9.32708	6.32515	8.48286	7.05406	8.93639	7.87608	7.79488	7.17994	9.04152	7.88003	8.42064	8.51703	5210	-
NUMBL	numb homolog (Drosophila)-like	-1.54143	-0.624271	0.001351	0.021335	7.313	1	6.93332	7.4099	6.88795	7.0547	8.17077	7.55989	8.12486	6.32092	8.21298	7.68299	7.46228	7.33356	8.0746	6.69179	7.50993	6.88792	8.0561	6.2286	8.29154	6.5585	7.04918	6.12063	6.45972	6.90497	7.1909	6.58293	7.21094	7.07973	6.69691	6.90072	9253	CAG3A, CTG3A, NBL, NUMB-R, NUMBLIKE, NUMBR, TNRC23
C1orf112	chromosome 1 open reading frame 112	-1.54135	-0.624197	0.00312	0.040229	5.9247	2	4.9494	6.29018	6.30906	6.1618	5.95279	5.6865	6.14984	5.51747	6.19452	5.69878	7.14781	5.36681	6.39155	5.96037	6.93921	6.21714	6.92344	5.56466	6.7741	5.02996	5.66402	5.14122	5.77677	4.86525	5.79539	4.78747	5.35309	4.87335	4.99763	5.47396	55732	-
HSD17B7P2	hydroxysteroid (17-beta) dehydrogenase 7 pseudogene 2	-1.54111	-0.623966	0.003295	0.042097	4.6405	2	4.20121	4.39207	3.67168	4.51418	4.70286	4.71425	5.9601	4.88012	5.43092	4.28219	5.6354	4.14676	5.01249	4.90788	5.28375	4.46605	5.04443	3.89041	5.49513	4.07346	4.30575	3.75801	3.44201	4.2105	4.82114	3.49021	4.92744	4.74867	4.37896	3.98285	158160	HSD17B7, HSD17B_2, BA291L22.1
CCSAP	centriole_ cilia and spindle-associated protein	-1.54059	-0.623482	0.000385	0.008032	5.9768	2	6.13	5.72271	5.64187	5.68441	6.26615	6.02163	6.85028	4.98103	6.81208	6.02744	6.59461	6.05167	6.05042	5.90322	6.06813	6.49172	7.07787	4.90892	6.34433	5.28995	6.02376	5.02914	6.03542	4.92588	6.02849	5.5877	5.85704	5.58239	5.34386	5.44155	126731	C1ORF96, CSAP
TOMM40L	translocase of outer mitochondrial membrane 40 homolog (yeast)-like	-1.5403	-0.623216	0.000503	0.009864	7.2995	1	6.60309	6.87458	7.74375	7.02708	7.92038	6.80865	7.93526	6.67231	8.34237	7.12715	8.16514	7.48807	7.87595	7.26076	8.21011	7.5558	7.78918	6.93085	7.30935	6.84276	7.00023	6.5744	6.93201	6.59542	6.96213	6.92025	6.38535	6.47844	6.90495	6.56686	84134	TOMM40B
FEZ1	fasciculation and elongation protein zeta 1 (zygin I)	-1.53896	-0.621958	0.001126	0.018587	7.9359	1	8.30008	6.9294	8.13886	7.82167	8.31388	7.38205	6.91896	7.98977	7.89956	7.47722	8.13364	5.87619	8.26521	6.55005	8.30571	6.61837	8.85164	8.24073	8.20582	7.97407	7.6896	8.00485	8.12926	7.87608	8.71011	7.98594	8.12497	7.18773	8.58778	7.82727	9638	-
SHMT2	serine hydroxymethyltransferase 2 (mitochondrial)	-1.53636	-0.619514	1.41e-09	4.26e-07	10.2375	1	10.665	9.72192	10.3793	9.74381	10.9033	9.66748	10.3696	10.1714	10.6384	10.1919	10.8121	9.86125	10.881	9.91458	10.6791	9.96988	10.2875	9.90598	10.4601	9.5405	10.1134	10.0227	10.4387	9.90855	10.123	10	9.96403	9.28501	10.6619	10.1777	6472	GLYA, HEL-S-51E, SHMT
DPY19L1	dpy-19-like 1 (C. elegans)	-1.5355	-0.618713	2.24e-07	2.37e-05	6.8401	1	7.16955	5.6198	7.20744	6.59706	6.98929	6.5611	7.11384	6.76956	7.09219	6.61047	7.20954	5.87619	6.97078	6.36491	7.05023	6.41624	7.30338	6.78469	7.11236	7.06125	6.72697	6.72588	7.19307	6.26083	7.46983	6.3493	7.39308	5.86863	6.78051	6.94763	23333	-
ROM1	retinal outer segment membrane protein 1	-1.53359	-0.616911	0.000339	0.007242	5.218	2	4.78845	4.62247	6.23602	5.30959	6.08286	4.51623	5.33549	4.48132	5.70511	4.82353	5.66087	5.67638	6.03555	5.01966	6.01071	5.46335	5.01073	4.76958	5.24307	4.77573	4.9967	4.93897	5.20491	4.55564	5.05042	4.42454	5.24889	5.25581	5.34386	4.15265	6094	ROM, ROSP1, RP7, TSPAN23
GGPS1	geranylgeranyl diphosphate synthase 1	-1.53293	-0.616294	0.002401	0.032656	8.3077	1	7.62773	8.29728	7.87584	7.79462	9.34718	7.96169	9.17783	7.76765	9.15069	7.79753	9.29868	8.41186	8.83256	8.52273	9.07042	8.43445	8.90764	7.6096	8.64157	7.50963	8.35729	7.94819	7.94196	7.6204	7.4856	7.79078	6.84454	7.79851	7.76575	7.40807	9453	GGPPS, GGPPS1
CDCA3	cell division cycle associated 3	-1.53277	-0.616137	4.92e-06	0.000298	6.6434	2	7.1858	6.41836	6.76352	6.74003	7.46875	6.35403	6.59442	6.89556	6.94136	6.26756	7.16572	6.2519	7.1051	6.47359	6.94689	6.50636	6.78077	5.79772	6.96152	6.14557	7.06117	6.13424	6.38426	5.09383	6.96213	6.39682	6.7586	6.61566	6.57108	5.7634	83461	GRCC8, TOME-1
ATG16L1	autophagy related 16-like 1	-1.52775	-0.611412	0.000293	0.006484	8.1972	1	7.85812	8.22462	7.80185	7.83235	8.86928	8.32189	9.23282	7.7051	8.91014	8.11432	8.87219	7.9712	8.91006	8.16579	8.87313	8.28546	8.54528	7.4533	8.63896	7.47199	7.41867	7.64494	7.88287	7.47074	7.95633	7.46825	7.91403	7.12223	8.09454	7.90064	55054	APG16L, ATG16A, ATG16L, IBD10, WDR30
HMGB2	high mobility group box 2	-1.52537	-0.609162	6.66e-09	1.38e-06	8.8333	1	9.27138	8.21582	9.40141	8.61705	9.16197	8.31428	8.62717	8.62054	8.93031	8.49104	8.89653	8.10857	8.72307	8.12054	9.02583	8.42678	8.94604	8.71912	8.87275	8.39187	9.47189	8.80979	9.33541	8.21359	9.30396	8.48356	8.93362	9.09323	9.43668	8.4247	3148	HMG2
AURKA	aurora kinase A	-1.52366	-0.60754	9.88e-05	0.002832	7.0713	1	8.02095	6.32331	7.73052	6.89068	7.15056	6.64842	7.2504	7.14791	6.77291	6.49713	7.29337	6.37586	7.08356	5.84371	7.00684	5.78474	7.04495	6.99482	6.68568	6.81297	7.82224	6.8299	7.25369	6.3185	7.56194	7.35253	7.33488	7.13058	7.67254	7.07987	6790	AIK, ARK1, AURA, AURORA2, BTAK, PPP1R47, STK15, STK6, STK7
BCL11A	B-cell CLL/lymphoma 11A (zinc finger protein)	-1.52252	-0.606463	0.000167	0.004282	5.9814	2	5.65724	5.74732	5.58418	6.22799	6.54939	5.48436	6.23611	5.66632	6.40131	6.33508	6.60777	5.51797	6.54651	5.80263	6.91595	5.85503	6.81046	5.15276	6.58062	5.37397	5.69511	5.19415	6.01555	5.77587	6.19116	5.01766	5.90354	5.84852	5.38718	5.30409	53335	BCL11A-L, BCL11A-S, BCL11A-XL, BCL11A-M, CTIP1, EVI9, HBFQTL5, ZNF856
KLF10	Kruppel-like factor 10	-1.52199	-0.605958	2.49e-07	2.61e-05	9.0542	1	9.04811	8.42104	9.07217	8.29681	9.36007	8.71187	9.75206	9.16907	9.76382	9.10399	9.45613	8.75404	9.38086	8.70656	9.3079	8.44968	9.69162	8.55376	9.72234	8.56048	9.20927	8.5805	8.98061	8.84188	8.76281	8.52424	8.8852	8.48917	9.04872	9.20332	7071	EGR-ALPHA, EGRA, TIEG, TIEG1
ZNF367	zinc finger protein 367	-1.52002	-0.60409	0.000722	0.013157	4.8011	2	5.28728	4.19137	5.66987	5.1134	4.83532	4.88834	4.98309	4.57038	4.95881	5.59242	5.25531	5.10545	4.55083	4.09783	5.01843	4.20409	5.47345	3.82153	5.21527	3.79735	5.09322	4.4661	4.75572	3.61572	5.45454	4.22839	4.78567	4.03286	5.05248	4.44197	195828	AFF29, CDC14B, ZFF29
DYNC1LI1	dynein_ cytoplasmic 1_ light intermediate chain 1	-1.51991	-0.603986	1.52e-05	0.000681	9.4398	1	9.50949	8.31797	9.98983	8.26563	10.0583	8.24393	9.64576	9.46604	10.0959	8.70777	10.0609	8.92388	9.78501	8.73413	9.67888	8.99746	9.59116	9.3061	9.63058	9.46828	9.44242	9.61425	9.36907	9.3337	9.37127	9.35042	9.2871	9.41035	9.8925	9.33928	51143	DNCLI1, LIC1
RAB40B	RAB40B_ member RAS oncogene family	-1.51941	-0.603508	1.28e-05	0.000594	8.1564	1	8.03597	7.41759	8.06169	7.45786	8.64095	6.94301	8.43473	8.13918	9.00616	7.69845	8.62926	7.85292	8.6071	7.6848	8.94193	7.85348	8.5859	7.84908	8.76418	7.47675	8.31788	8.04142	7.79236	8.0965	7.80748	8.19861	7.76458	8.03043	8.36214	8.04247	10966	RAR, SEC4L
OSGIN2	oxidative stress induced growth inhibitor family member 2	-1.51918	-0.603294	0.000203	0.004941	6.0567	2	5.9129	5.4199	5.77674	6.21173	6.69598	5.31168	6.69358	5.62534	6.81208	5.89052	6.60777	6.16293	6.72403	5.76034	7.28627	5.83198	6.22702	5.79772	6.44353	5.56481	5.94835	5.91526	5.67912	5.69108	5.48623	5.74284	6.01363	5.28603	5.50984	5.56705	734	C8ORF1, HT41
CKS2	CDC28 protein kinase regulatory subunit 2	-1.51751	-0.601704	0.001262	0.0202	8.6943	1	8.67101	9.0299	9.34391	8.96397	9.11496	8.73485	8.36533	7.7582	8.96113	8.11432	9.91896	8.51133	9.30535	8.73959	9.3286	9.18196	9.2431	7.7872	8.80906	7.92268	8.28761	8.05579	8.48037	7.54509	8.8476	7.59588	8.26513	7.93352	8.58778	7.82727	1164	CKSHS2
SCML1	sex comb on midleg-like 1 (Drosophila)	-1.51741	-0.601609	0.002748	0.036392	5.7212	2	5.76211	5.50898	5.55444	4.9267	6.28171	6.2934	7.01969	4.94817	6.19452	5.50131	6.58133	5.69765	6.55697	5.73872	6.37156	5.85503	5.84254	5.06608	6.15238	5.20073	4.66104	5.38836	4.93565	4.63041	5.17232	5.0772	5.85704	5.50741	5.38718	4.78971	6322	-
C17orf59	BLOC-1 related complex subunit 6	-1.51713	-0.601345	0.001103	0.018308	8.3567	1	8.03597	8.05255	7.80816	8.29681	9.71562	8.02832	8.77241	8.32663	9.26803	8.26734	8.95433	7.98424	9.10258	7.96167	9.12892	8.06101	8.20508	7.67939	9.05243	7.65525	7.77937	7.90915	7.96804	8.08325	7.61307	8.19525	7.48769	7.69531	8.35124	7.78914	54785	C17ORF59, PRO2472, BORCS6
DLGAP4	discs_ large (Drosophila) homolog-associated protein 4	-1.51618	-0.600439	0.003612	0.04504	9.4248	1	8.6977	9.23966	8.43244	8.66862	10.3414	9.05781	10.2074	9.30342	10.5096	9.34251	9.82912	9.39842	10.0062	8.98884	9.91624	8.87594	10.2042	8.6363	10.4601	8.5959	9.63108	8.58546	8.33564	9.14416	8.46576	9.06442	8.90247	9.36329	8.70368	9.4226	22839	DAP-4, DAP4, DLP4, SAPAP-4, SAPAP4
SAC3D1	SAC3 domain containing 1	-1.51553	-0.599827	0.000282	0.006299	8.0931	1	8.51897	6.94012	8.80178	7.43702	9.17453	7.20409	7.77571	8.72608	8.17217	7.39101	8.28468	7.53018	8.31534	7.27585	8.34688	7.26017	7.84284	8.02023	8.02543	7.42353	8.33279	7.87713	8.44738	7.84502	8.57663	8.45859	7.74556	7.60229	8.52613	8.0798	29901	HSU79266, SHD1
ECT2	epithelial cell transforming 2	-1.51455	-0.598888	3.96e-07	3.79e-05	7.4835	1	7.99966	7.07266	8.32647	7.16019	7.0811	7.05682	7.6102	7.56583	7.4247	6.99144	7.82544	6.56136	7.58037	7.02215	7.59051	7.0059	7.97977	7.16436	7.50004	7.44311	7.55202	7.50005	7.72055	6.92739	8.37556	7.32823	7.4953	6.93464	7.81417	7.27644	1894	ARHGEF31
MRPL41	mitochondrial ribosomal protein L41	-1.51393	-0.5983	0.000438	0.008871	10.6325	1	10.3684	10.2428	10.8832	10.0657	11.8363	9.79324	10.5385	10.3296	11.2004	9.66334	11.7429	10.5144	11.2962	10.3466	11.2308	11.0268	10.7835	10.159	10.7527	10.2785	10.4876	10.4248	10.201	10.3389	10.3723	10.2501	9.88512	10.5852	10.4987	9.73494	64975	BMRP, MRP-L27, MRPL27, PIG3, RPML27
BCKDK	branched chain ketoacid dehydrogenase kinase	-1.51373	-0.59811	4.6e-06	0.000279	9.109	1	9.31636	8.41337	8.92017	8.4572	10.094	8.2717	9.31014	9.07136	9.80808	8.79428	9.47241	8.82584	9.87029	8.72317	9.50138	8.73705	9.21007	8.88656	9.38595	8.55824	8.77244	8.90018	9.21208	9.14097	8.7367	8.97137	8.87356	8.34229	9.4923	9.14161	10295	BCKDKD, BDK
CDCA4	cell division cycle associated 4	-1.51256	-0.596989	1.69e-12	1.39e-09	8.7266	1	9.13994	8.03266	9.46472	8.43985	9.24965	8.26777	8.69837	8.74533	8.96765	8.57443	9.13789	8.37272	9.02938	8.19386	8.69095	8.44589	8.95049	8.20737	8.79033	8.15119	8.79773	8.38377	9.01854	8.34151	9.04936	8.40731	8.93362	8.37077	8.85018	8.82409	55038	HEPP, SEI-3/HEPP
PLP2	proteolipid protein 2 (colonic epithelium-enriched)	-1.50932	-0.593902	0.002181	0.030569	11.0135	1	10.5515	10.8012	10.6597	10.8844	11.9963	10.677	11.4067	10.5345	11.9992	10.9515	11.8205	11.1994	11.8633	11.2201	11.8097	11.0991	11.3485	10.3073	11.5769	10.1042	10.9304	10.2483	10.5395	10.3996	10.2747	10.1848	10.0375	10.4566	10.3272	10.2473	5355	A4, A4LSB
TYMS	thymidylate synthetase	-1.50929	-0.593867	0.000301	0.006627	5.5146	2	5.7181	5.64622	5.36189	5.90279	6.21842	5.53761	6.03076	4.98103	6.03812	5.83562	6.07509	5.00663	5.82673	5.39618	6.08213	5.57862	6.22702	4.8057	6.15238	4.95009	4.83861	4.66671	5.54694	5.03999	5.74389	4.42454	5.35309	4.83297	5.10532	4.68285	7298	HST422, TMS, TS
FANCI	Fanconi anemia_ complementation group I	-1.50827	-0.592898	1.39e-05	0.000631	6.9845	1	7.2947	7.013	7.2819	6.62189	6.8077	6.9331	7.58694	6.76956	7.36009	7.44702	7.25206	5.83838	7.49049	6.0683	7.00684	6.28661	7.47384	6.81158	7.45913	6.23815	7.19769	6.22606	7.31187	6.03175	7.22886	6.92025	7.0955	6.61566	6.87483	7.13158	55215	KIAA1794
DTL	denticleless E3 ubiquitin protein ligase homolog (Drosophila)	-1.50816	-0.592785	0.001617	0.02451	5.3517	2	6.16321	5.56545	5.69734	5.79773	5.62696	5.11548	5.87046	5.10546	4.92347	5.52463	5.4723	4.66165	5.33764	5.50262	5.88854	4.92401	5.63701	4.8057	6.20988	4.26167	6.27076	4.4661	4.89273	3.46043	5.45454	5.16215	4.92744	4.7046	5.4701	5.26758	51514	CDT2, DCAF2, L2DTL, RAMP
FOXM1	forkhead box M1	-1.50596	-0.590687	0.000228	0.005346	6.9525	1	7.40523	6.43361	6.95776	7.12588	7.27241	6.68428	7.68221	6.88691	7.26448	7.17216	6.51303	6.49	7.40046	5.50262	6.94689	5.40207	7.26101	6.46151	7.82383	6.36676	7.39993	6.40511	7.34409	6.21298	6.91633	7.18671	6.86818	6.77332	6.88997	7.05865	2305	FKHL16, FOXM1B, HFH-11, HFH11, HNF-3, INS-1, MPHOSPH2, MPP-2, MPP2, PIG29, TGT3, TRIDENT
NDC80	NDC80 kinetochore complex component	-1.50516	-0.589921	3.71e-05	0.001335	6.0124	2	6.2482	5.77153	6.724	6.57179	6.31234	5.73291	6.05809	5.94141	6.43934	5.90836	5.99723	5.77974	6.43755	5.88365	6.41647	5.60606	6.1671	5.77967	6.7058	5.02996	6.60131	5.36547	6.11226	5.03999	6.24772	5.45931	5.24889	5.82813	6.23408	5.11151	10403	HEC, HEC1, HSHEC1, KNTC2, TID3, HSNDC80
TUBB	tubulin_ beta class I	-1.50391	-0.588722	9.38e-07	7.74e-05	11.9025	1	12.1565	11.1523	11.9252	11.7629	12.7017	11.3467	12.3195	11.8756	12.4598	11.8532	12.3678	11.7121	12.5671	11.3739	12.474	11.3135	11.8921	11.4527	12.2761	11.363	12.1599	11.417	11.8567	11.4765	11.6558	11.8631	11.2521	11.4958	11.8062	11.8455	203068	CDCBM6, M40, OK/SW-CL.56, TUBB1, TUBB5
PYGB	phosphorylase_ glycogen; brain	-1.50059	-0.585526	0.001595	0.024294	12.1534	1	11.9263	11.8262	11.4577	11.4848	13.0404	11.8625	12.9292	12.2359	12.9197	12.2163	12.4634	11.781	12.9249	11.1639	12.8333	11.0375	12.6757	11.6706	13.107	11.8	11.9066	11.8868	11.364	11.8677	11.536	12.0733	11.5739	11.407	11.7198	12.2795	5834	GPBB
ARHGAP29	Rho GTPase activating protein 29	-1.50039	-0.585342	0.000316	0.006876	5.8382	2	6.0612	5.29186	5.90008	4.01146	5.6749	4.92877	6.93379	5.97442	6.42677	4.78542	6.36588	5.44437	5.94291	5.47674	5.85631	5.57862	6.08851	5.68589	5.58479	6.27139	6.24998	5.81744	6.16732	5.29109	6.09166	5.45931	6.01363	5.86863	6.05764	5.81491	9411	PARG1
ACTR6	ARP6 actin-related protein 6 homolog (yeast)	-1.4987	-0.583709	0.00135	0.02133	8.4776	1	8.39865	8.01249	8.93467	7.88459	9.02303	8.0741	8.94334	7.77235	9.40243	7.49504	9.44517	8.45623	8.91616	8.70934	9.32419	8.89553	8.79585	7.91669	8.49893	8.18065	7.0371	8.52476	8.11998	7.91024	8.63434	7.90609	7.87955	7.79851	8.16468	7.90064	64431	ARP6, CDA12, HSPC281, MSTP136, HARP6, HARPX
KIF22	kinesin family member 22	-1.49774	-0.582784	3.32e-12	2.2e-09	8.477	1	8.79094	8.1801	8.51965	8.20118	9.15776	7.89184	8.47583	8.46953	8.84553	8.27423	8.98491	8.05601	8.81742	7.99852	8.97795	7.78912	8.63373	8.05815	8.86382	8.10276	8.67054	8.32565	8.71712	8.17976	8.70338	8.2053	8.29596	8.45632	8.45667	8.0152	3835	A-328A3.2, KID, KNSL4, OBP, OBP-1, OBP-2, SEMDJL2
MCM2	minichromosome maintenance complex component 2	-1.49768	-0.582734	1.28e-06	0.000102	7.6017	1	8.26227	7.33066	7.99131	7.66918	7.93522	7.50747	7.92045	7.21851	7.75126	7.94312	7.58713	7.21316	8.20664	7.03107	7.78283	7.30271	7.73861	7.2055	7.82383	6.92166	7.66625	6.85477	7.84397	6.78736	7.87487	7.6161	7.40121	6.43863	8.06817	7.52096	4171	BM28, CCNL1, CDCL1, D3S3194, MITOTIN, CDC19
SEC22C	SEC22 homolog C_ vesicle trafficking protein	-1.49763	-0.582686	0.000105	0.002979	7.3185	1	7.73837	6.11206	7.53884	6.21173	7.43435	6.90298	7.17127	7.505	7.80564	6.76536	7.7503	6.58439	7.47954	5.99725	7.67147	6.10624	7.62627	7.37132	7.60019	7.46243	7.69729	7.53125	7.50948	7.42421	7.73679	7.34043	7.52535	6.77332	7.53487	7.35685	9117	SEC22L3
VASP	vasodilator-stimulated phosphoprotein	-1.49721	-0.582278	2.76e-06	0.000185	9.2438	1	9.32861	8.81963	9.05103	8.68049	10.4701	8.89391	9.58834	9.06946	9.85456	9.14408	9.60136	8.67848	9.82233	8.7423	9.53358	8.74941	9.38467	8.93628	9.58649	8.78425	9.43323	8.80767	9.11972	9.01756	8.87778	9.04405	8.85001	9.27374	9.28749	9.00133	7408	-
GINS1	GINS complex subunit 1 (Psf1 homolog)	-1.49541	-0.580544	0.000192	0.00474	6.804	1	7.1858	6.9294	7.21696	6.82803	6.97978	6.38342	7.36423	6.86066	7.24314	6.8783	7.21814	6.89182	7.161	7.03994	7.18609	7.10537	7.04495	5.72414	7.1569	6.13357	6.91036	5.99201	7.09234	5.58228	7.12196	6.01057	6.38535	5.60654	6.67959	5.95927	9837	PSF1
RCBTB1	regulator of chromosome condensation (RCC1) and BTB (POZ) domain containing protein 1	-1.49451	-0.579672	0.000324	0.007016	5.9709	2	5.96405	5.22331	6.25463	4.71219	5.74394	5.73291	6.59442	5.87303	6.2668	5.52463	6.09392	4.66165	6.06515	4.94611	6.27734	4.46605	6.50632	6.13234	6.2239	6.33566	6.27076	6.13424	6.16732	6.03175	6.70365	5.96401	6.28353	5.82813	6.23408	5.78939	55213	CLLD7, CLLL7, GLP
F12	coagulation factor XII (Hageman factor)	-1.4941	-0.579272	2.11e-05	0.000869	8.4509	1	8.88683	8.05255	8.99402	7.82702	9.35456	7.79127	8.05538	8.52629	8.70172	7.71882	9.10114	8.38916	8.88122	8.28617	8.74476	8.49807	8.07252	7.98522	7.98483	7.84016	8.5693	8.16589	8.55797	8.19832	8.86277	8.6099	8.31329	8.01246	8.95466	7.52096	2161	HAE3, HAEX, HAF
EFNB1	ephrin-B1	-1.49374	-0.578926	0.000794	0.014154	10.117	1	9.69596	10.1079	9.45671	9.93554	10.9301	10.2809	10.5097	9.79537	10.9436	10.452	10.5797	9.52283	10.9301	9.41911	10.7685	9.34348	10.7532	9.65691	10.9835	9.677	9.54837	9.73304	9.98813	9.66688	9.72508	9.5606	9.59402	9.4257	9.68469	9.70282	1947	CFND, CFNS, EFB1, EFL3, EPLG2, ELK-L, LERK2
RFC3	replication factor C (activator 1) 3_ 38kDa	-1.49339	-0.578591	2.07e-05	0.000857	6.1946	2	6.90743	6.1309	7.02434	6.22799	6.42876	5.86378	5.82346	6.0994	5.86266	5.79783	6.09392	5.56503	6.02051	5.78164	6.16341	5.55066	6.50632	5.88471	6.19572	5.88422	6.94957	5.94645	6.25466	5.61947	6.91633	6.18309	6.62622	6.20552	6.62635	5.19165	5983	RFC38
H2AFZ	H2A histone family_ member Z	-1.49254	-0.577771	0.000223	0.005268	10.8726	1	10.8679	10.7373	11.0832	10.8591	11.6821	10.5459	10.8021	10.3096	11.3309	10.6082	11.8251	10.807	11.5202	11.0885	11.4969	11.192	11.4192	10.1503	11.0699	10.1987	10.6282	10.5042	10.7122	9.93829	10.7251	10.1797	10.0086	10.1608	10.8546	10.1863	3015	H2A.Z-1, H2A.Z, H2A/Z, H2AZ
CDCA7	cell division cycle associated 7	-1.49213	-0.577375	0.001384	0.021786	5.7425	2	6.45899	6.40295	6.44491	4.66518	5.44541	6.27783	6.50789	5.90762	5.68415	5.89052	5.93594	5.34	5.98997	4.78671	5.33142	4.96696	6.08851	5.15276	5.70963	4.71259	6.1413	5.114	5.40143	4.92588	6.21026	5.13438	5.9706	5.45517	6.43321	5.37446	83879	JPO1
DDX60L	DEAD (Asp-Glu-Ala-Asp) box polypeptide 60-like	-1.49159	-0.576848	0.001912	0.027582	7.4279	1	7.91121	7.54242	7.36133	7.58959	7.24091	7.54045	7.13324	6.98737	6.63771	6.43694	7.28521	6.2519	7.27307	7.35613	7.3043	6.80749	7.35129	6.65211	7.66844	7.26202	7.93723	7.26049	7.55836	7.08191	8.45779	6.50918	8.95861	7.42351	7.75752	7.00421	91351	-
ZBED5-AS1	ZBED5 antisense RNA 1	-1.49158	-0.576839	0.00025	0.005747	6.3048	2	6.19567	5.38893	6.80199	5.14801	6.92136	5.79982	6.61296	6.21441	6.83127	4.70603	6.82617	5.83838	6.62811	5.92252	6.67853	6.19924	5.7638	6.08903	6.12275	6.18099	7.01263	6.30037	6.57281	6.32976	6.3546	6.30017	6.13553	6.70785	6.79667	5.62593	729013	-
GINS4	GINS complex subunit 4 (Sld5 homolog)	-1.49156	-0.576824	0.001764	0.026018	5.5505	2	6.22742	4.72519	6.29114	5.18181	5.65113	4.71425	6.19977	5.85541	5.35338	5.52463	4.87475	4.52551	5.38535	4.65443	5.37757	4.20409	5.4485	5.52188	5.54065	5.33257	6.5848	5.02914	6.13085	4.89588	6.1718	5.72433	5.59897	6.07312	5.82542	5.44155	84296	SLD5
ZWILCH	zwilch kinetochore protein	-1.48875	-0.574098	8.37e-05	0.002509	6.1716	2	6.32846	5.59288	6.724	6.12752	6.40052	5.63856	6.98451	6.24178	6.62677	5.99441	6.03669	5.75965	5.84391	5.88365	6.06813	4.58111	6.69849	6.26797	6.0925	5.61747	6.85638	6.28825	6.39967	5.19583	6.62042	6.20994	6.22979	6.14084	6.39128	5.53668	55055	KNTC1AP, HZWILCH
KIF15	kinesin family member 15	-1.48766	-0.573042	9.09e-05	0.002672	5.3471	2	5.9387	5.07559	5.77674	5.39851	4.99491	5.70989	5.90096	5.44866	5.70511	5.52463	5.87193	4.97213	5.36169	4.90788	5.23445	4.73814	5.4485	4.48774	5.99774	4.80629	4.78182	4.90762	5.86824	4.34978	5.93972	5.0772	5.35309	5.19339	5.76101	4.73727	56992	HKLP2, KNSL7, NY-BR-62
TMEM194A	nuclear envelope integral membrane protein 1	-1.48622	-0.571652	0.002424	0.032909	5.8871	2	6.31867	4.82109	6.58385	5.56142	4.65586	5.58897	6.42636	6.00669	5.66288	5.73922	5.41356	4.78604	5.79174	4.86861	5.93558	4.27417	5.98818	6.10361	6.4315	5.65153	6.07193	5.47647	6.45972	5.80844	6.78234	5.48151	6.59822	6.26742	6.25761	5.9362	23306	TMEM194, TMEM194A, NEMP1
HAUS6	HAUS augmin-like complex_ subunit 6	-1.4857	-0.571142	0.000216	0.005151	7.017	1	7.74204	6.1309	7.42021	5.92291	6.42876	6.02163	7.29127	7.35011	7.0354	6.71555	7.19217	6.11629	6.82265	6.15245	6.99948	6.52084	7.17235	6.73873	6.96986	6.72772	7.58559	6.76139	7.52361	6.75431	7.58407	6.89565	7.53276	7.38214	7.49582	7.26722	54801	DGT6, FAM29A
SHCBP1	SHC SH2-domain binding protein 1	-1.48533	-0.570784	3.11e-07	3.14e-05	6.5903	2	7.15311	6.41836	7.24515	6.46604	6.73042	6.41222	6.67605	6.54624	6.67005	6.62133	6.62081	6.22285	6.62811	5.39618	7.15331	5.43304	6.69849	6.28086	7.01894	6.29314	6.78592	6.34786	7.02438	6.07255	6.92792	6.32495	6.52575	6.57951	6.84407	6.35696	79801	PAL
HAUS1	HAUS augmin-like complex_ subunit 1	-1.48523	-0.570684	0.000525	0.010194	7.1296	1	7.00834	7.11111	7.70368	7.06379	7.83329	6.84078	6.99162	6.55717	7.59158	6.79443	8.12452	7.03241	7.56491	7.32019	7.57078	7.74661	7.6701	6.10361	7.45319	6.7593	6.77141	6.60404	7.3361	6.42735	6.66263	6.33718	6.7712	6.38379	7.06021	6.15188	115106	CCDC5, HEI-C, HEIC, HST1461
ARHGAP11A	Rho GTPase activating protein 11A	-1.48488	-0.570348	9.04e-05	0.002669	6.7422	1	7.19653	6.57786	7.13897	7.13453	6.54939	6.87222	6.99162	6.75063	6.7828	6.82294	7.14781	6.16293	6.78756	5.78164	6.96966	6.57738	7.12588	5.6466	7.72376	6.20412	6.93662	6.10689	6.78719	5.56332	7.13202	6.56224	6.5108	6.20552	7.00567	6.5966	9824	GAP (1-12)
SNAPC2	small nuclear RNA activating complex_ polypeptide 2_ 45kDa	-1.48476	-0.570231	0.000573	0.010952	7.6145	1	7.87826	6.59152	7.77632	6.46604	8.43366	6.35403	7.48994	7.81853	8.28436	6.72565	7.93392	6.90102	8.18658	6.48662	7.83751	6.81926	7.37797	7.67939	7.77704	7.7007	7.77937	7.50005	7.80399	7.92888	7.56935	7.79078	7.65332	7.31043	8.09454	7.78914	6618	PTFDELTA, SNAP45
NMT2	N-myristoyltransferase 2	-1.48375	-0.569249	1.54e-06	0.000118	6.821	1	6.91394	6.18597	6.95776	6.35192	7.39911	6.64842	6.97738	6.76012	7.51055	6.61047	7.58713	6.81602	6.99405	6.90088	7.29831	6.97467	6.97677	6.36798	7.2282	6.04663	7.18679	6.05059	6.78719	6.28418	6.79505	6.28762	6.44944	6.70785	6.84407	6.37424	9397	-
SLC2A9	solute carrier family 2 (facilitated glucose transporter)_ member 9	-1.4803	-0.565891	0.000852	0.014996	7.5964	1	7.46416	6.90772	7.52358	7.56418	7.80664	7.14526	7.74661	7.31187	8.40456	7.75871	8.27233	6.87324	8.47549	6.43379	8.22912	6.80749	8.23457	7.35313	8.46096	7.41859	7.09653	7.25428	7.08283	7.86838	7.40499	6.97606	7.55478	7.28821	6.81264	7.58171	56606	GLUT9, GLUTX, UAQTL2, URATV1
DDX39A	DEAD (Asp-Glu-Ala-Asp) box polypeptide 39A	-1.47934	-0.56495	1.01e-12	9.67e-10	9.7323	1	9.86443	9.2929	10.2096	9.2354	10.3246	9.28112	9.67914	9.75676	9.88587	9.03257	10.1669	9.30101	10.0186	9.23258	9.9605	9.58837	9.89464	9.3419	9.86451	9.43688	10.0167	9.34697	9.99829	9.44145	10.0253	9.47048	9.74211	9.92669	10.0658	9.39112	10212	BAT1, BAT1L, DDX39, DDXL, URH49
PLOD1	procollagen-lysine_ 2-oxoglutarate 5-dioxygenase 1	-1.47909	-0.564706	2.54e-05	0.000996	9.1854	1	9.56852	8.82542	9.34608	9.06703	9.50137	8.75467	8.57374	8.80619	9.7091	9.2139	9.27825	8.56441	10.0119	8.00306	9.45236	7.97945	9.44742	8.89706	9.74196	9.03549	8.82609	8.87	9.45825	9.33789	9.4254	9.12563	9.50446	8.66045	9.32417	9.21055	5351	EDS6, LH, LH1, LLH, PLOD
CEP78	centrosomal protein 78kDa	-1.47809	-0.563737	0.000326	0.00704	5.5328	2	5.4396	5.11396	6.15908	5.58687	5.57738	5.53761	6.03076	5.62534	6.05454	5.67813	6.01709	5.22748	5.91066	4.98335	6.21516	5.33807	6.29859	5.5	5.60636	5.10564	5.22687	4.50852	5.97497	4.55564	5.24822	4.67634	5.31919	4.51346	5.50984	5.91274	84131	C9ORF81, IP63
SURF2	surfeit 2	-1.47798	-0.563626	3.22e-05	0.001201	8.0638	1	8.03298	7.85715	8.01879	7.53833	9.14292	7.67131	8.21563	7.88948	8.4946	7.85386	8.90987	8.04775	8.60962	7.84005	8.48504	8.04105	8.11675	7.48706	8.22687	7.52349	8.46944	7.91704	7.63198	7.57853	7.95633	7.58567	7.36843	7.97121	8.2375	7.23921	6835	SURF-2
PRAF2	PRA1 domain family_ member 2	-1.47757	-0.56323	0.000653	0.012095	5.714	2	5.62582	5.86449	5.21758	5.53552	6.18571	6.00282	5.60001	4.80869	6.0215	5.9434	6.47044	4.86338	6.40319	5.69449	6.64118	5.90005	5.88035	4.73253	6.25154	4.80629	6.1413	5.19415	5.95425	4.89588	5.38899	5.48151	5.48126	5.48153	5.82542	5.26758	11230	JM4
PIK3CD	phosphatidylinositol-4_5-bisphosphate 3-kinase_ catalytic subunit delta	-1.47692	-0.562596	0.000292	0.006484	5.9795	2	5.96405	5.67217	6.32676	4.96602	5.83114	5.73291	6.68484	6.21441	6.30849	6.21117	5.66087	4.90055	6.25693	4.74395	6.24035	5.33807	6.22702	6.17438	6.36977	5.17754	6.40844	5.19415	6.63923	5.96109	6.26609	5.39055	6.31827	6.10738	6.03058	6.22987	5293	APDS, IMD14, P110DELTA, PI3K, P110D
RAD51D	RAD51 paralog D	-1.4766	-0.562279	0.003691	0.045718	4.7627	2	5.403	3.45919	6.19806	4.84468	4.79251	4.15651	4.47583	4.11751	4.60448	4.48605	4.95931	3.87524	4.41946	4.69988	4.69306	4.92401	4.86746	4.53154	4.90302	4.38828	4.83861	4.66671	5.27343	4.25843	5.66301	5.31836	5.24889	4.91262	4.46234	3.5682	5892	BROVCA4, R51H3, RAD51L3, TRAD
DZIP1	DAZ interacting zinc finger protein 1	-1.47587	-0.561567	2.43e-05	0.000964	6.5767	2	6.79186	6.60505	6.85173	6.17863	6.42876	6.46815	7.36423	6.20052	7.19949	6.59953	6.64654	5.65478	6.7516	5.47674	6.8923	5.2364	6.86805	6.52788	6.99461	6.36676	7.08484	6.20042	6.70273	6.30715	6.80765	6.09941	6.55517	6.61566	6.4124	6.80204	22873	DZIP, DZIPT1
BLVRA	biliverdin reductase A	-1.47551	-0.561212	0.003697	0.045718	8.5657	1	8.30753	7.96079	8.64838	8.40808	9.96493	7.70079	8.93046	8.15727	9.41839	8.37392	9.52538	8.39893	9.21249	8.411	9.48961	8.51264	8.40315	8.124	8.40051	8.24342	8.2825	8.42311	8.20138	8.43833	7.68311	8.24478	7.40929	8.0034	7.94313	8.05323	644	BLVR, BVR, BVRA
HCFC1R1	host cell factor C1 regulator 1 (XPO1 dependent)	-1.47508	-0.560797	0.000135	0.0036	7.9555	1	7.89483	7.66378	8.1735	7.20196	8.96638	7.45998	7.42321	7.51063	8.41732	7.77339	8.62926	7.53018	8.63944	7.36321	8.18113	7.728	7.96225	7.72254	8.26466	7.42353	8.61065	7.41342	8.18813	7.98338	7.62023	7.95453	7.25643	8.28732	8.01393	7.21064	54985	HPIP
ZNF593	zinc finger protein 593	-1.47354	-0.559289	0.002398	0.032654	9	1	9.5041	8.34242	10.0064	8.04008	9.60553	7.71819	8.20038	9.1903	8.79754	7.45917	9.69682	8.36941	9.05542	8.59067	9.04025	9.09507	8.67196	8.9199	8.54434	8.99461	9.01658	9.39014	9.35728	8.75682	9.60212	8.94764	8.80172	8.64012	9.80137	8.43297	51042	ZT86
TEX264	testis expressed 264	-1.47342	-0.559172	0.001905	0.027522	9.9742	1	9.58086	9.86378	9.65886	9.66982	11.0999	9.4434	9.95011	9.56959	10.803	9.59198	10.8555	10.0896	10.8052	9.91337	10.7273	10.1531	10.2591	9.65938	10.3341	9.59623	8.90134	9.78572	9.77275	9.54413	9.68468	9.42966	9.47396	9.10388	9.68686	8.9006	51368	ZSIG11
LIN9	lin-9 DREAM MuvB core complex component	-1.4727	-0.558466	9.18e-05	0.002686	5.3633	2	6.00125	5.18777	6.23602	5.24711	5.06853	4.34755	5.61848	5.10546	5.70511	4.43772	5.52874	4.82523	5.47631	5.22017	5.23445	5.85503	5.56917	5.40902	5.3746	4.92246	5.72555	5.55951	5.67912	4.86525	5.89319	4.95555	5.90354	4.56367	5.25312	5.06971	286826	BARA, BARPSV, LIN-9, TGS, TGS1, TGS2
BUB1B	BUB1 mitotic checkpoint serine/threonine kinase B	-1.46959	-0.555412	0.000941	0.016142	6.1854	2	7.0265	6.14949	6.85173	6.41011	5.76624	5.61398	6.43681	5.99065	5.40553	5.90836	5.97709	5.8191	6.07973	5.6255	6.12334	5.71085	6.12046	5.79772	6.29204	5.47254	6.29125	5.16792	6.69025	5.03999	7.00651	6.20994	6.55517	6.25219	7.12562	6.42486	701	BUB1BETA, BUBR1, BUB1A, MAD3L, MVA1, SSK1, HBUBR1
KIF20B	kinesin family member 20B	-1.46864	-0.554479	4.13e-05	0.001453	7.5468	1	8.12855	7.1016	8.08788	7.22646	7.78496	6.97231	7.4544	7.91096	7.54584	7.04888	8.00029	7.34709	7.74489	7.20668	7.84984	6.93195	6.92344	7.04856	7.34828	7.46243	7.89769	7.54659	8.17027	6.4378	8.24272	7.48484	7.23841	7.38214	8.0548	6.98185	9585	CT90, KRMP1, MPHOSPH1, MPP-1, MPP1
CENPF	centromere protein F_ 350/400kDa	-1.4643	-0.550213	0.002692	0.035776	7.3906	1	7.55453	7.47768	7.34405	8.02154	7.51558	7.79127	7.53926	7.18364	7.66295	7.84462	7.56705	7.12953	7.81191	6.30733	8.12136	6.18111	7.88064	6.65211	8.3693	6.33566	7.93072	6.56438	7.27055	6.27255	7.27495	7.02224	7.28306	7.13058	7.07353	6.47376	1063	CENF, CILD31, PRO1779, HCP-1
IFT22	intraflagellar transport 22	-1.46367	-0.549589	0.000419	0.00858	6.6732	2	6.46788	6.18597	6.76352	6.00071	7.46875	5.98376	6.90398	5.58315	7.25029	6.59953	7.64572	6.45294	7.37705	6.83109	7.199	6.80749	7.17995	6.80268	6.61295	6.53131	6.31146	6.22606	6.30464	6.57663	6.71707	6.24931	6.01363	6.15728	6.79667	6.11125	64792	RABL5
SKA2	spindle and kinetochore associated complex subunit 2	-1.46223	-0.54817	0.003461	0.043636	7.6521	1	7.22826	7.63768	7.66246	7.80007	8.70295	7.48731	8.45285	6.99543	8.32893	7.11952	8.3527	7.84341	8.16624	8.00306	8.4638	7.81873	7.8187	6.93085	7.84666	6.92166	7.5435	7.19058	7.58557	6.85128	7.24747	6.8017	6.7586	7.25803	6.88997	6.53649	348235	FAM33A
PPP3CA	protein phosphatase 3_ catalytic subunit_ alpha isozyme	-1.46054	-0.546502	0.000422	0.00862	9.3556	1	8.86177	8.97363	8.92889	9.15898	10.1743	9.13543	10.023	9.08276	10.0526	9.63146	10.0975	9.10795	9.96559	9.31157	10.0353	9.25092	9.66343	8.67587	9.73219	8.44626	9.36237	8.90614	9.06519	8.70154	9.01174	8.78974	8.86478	8.70307	9.07875	9.38474	5530	CALN, CALNA, CALNA1, CCN1, CNA1, PPP2B
MPI	mannose phosphate isomerase	-1.4595	-0.545479	8e-05	0.002418	7.6906	1	8.03298	6.84066	7.88782	7.57694	8.32143	6.11218	7.84009	7.3438	8.12628	7.22295	8.07799	7.39346	8.39327	7.60341	7.85801	7.52739	7.36469	7.74597	7.62154	7.34764	7.5435	7.63061	8.39066	7.68321	7.56935	7.69899	7.55478	6.7945	8.12685	7.54404	4351	CDG1B, PMI, PMI1
BCL7C	B-cell CLL/lymphoma 7C	-1.4589	-0.544879	0.000957	0.016338	8.5251	1	8.63792	7.38658	8.87277	7.92006	9.69542	7.60425	8.19424	8.49818	9.12952	7.59207	9.35049	7.70319	9.0701	7.71278	8.72259	8.3719	8.54822	8.72385	8.40051	8.48456	8.50934	8.84332	8.51969	8.42264	8.27936	8.49725	8.10023	8.36371	8.70796	8.18144	9274	-
ATIC	5-aminoimidazole-4-carboxamide ribonucleotide formyltransferase/IMP cyclohydrolase	-1.45815	-0.544137	4.74e-05	0.001612	9.0339	1	9.2612	8.1801	9.1033	8.76652	9.7991	8.20742	9.4902	9.1348	9.54876	8.69754	9.66412	9.10993	9.75921	8.8795	9.67773	8.80077	8.89385	8.58007	9.1621	8.83886	9.23594	8.77547	8.95737	8.63954	8.93918	8.99857	8.37234	8.50531	8.58313	8.4935	471	AICAR, AICARFT, HEL-S-70P, IMPCHASE, PURH
H2AFX	H2A histone family_ member X	-1.45763	-0.543622	5.17e-08	7.21e-06	9.8317	1	10.3275	9.25047	9.89218	9.60591	10.7571	9.44688	9.97809	9.70852	10.0769	9.56552	10.3601	9.69137	10.2689	9.40374	10.2152	9.62906	9.82969	9.40064	10.0313	9.33575	10.0244	9.55478	9.74738	9.32105	9.96186	9.81787	9.42499	9.79101	9.85249	9.3014	3014	H2A.X, H2A/X, H2AX
CENPO	centromere protein O	-1.4548	-0.540816	4.26e-05	0.001492	5.6989	2	6.18493	5.79534	5.92353	5.61188	6.15223	5.53761	6.0169	5.74496	5.78604	6.05973	5.28838	5.56503	6.46001	5.08964	5.6649	5.16442	6.10457	5.20778	6.16697	4.89428	6.04804	5.43309	6.13085	4.83395	6.09166	5.01766	5.48126	5.48153	5.54851	5.50566	79172	CENP-O, ICEN-36, MCM21R
ASF1B	anti-silencing function 1B histone chaperone	-1.45416	-0.540184	0.000329	0.00709	6.7943	1	7.40985	6.52188	7.02434	7.29755	7.38477	6.5611	6.56615	6.43204	7.01035	7.02454	6.62081	6.34922	6.97858	6.61081	7.09925	6.64506	6.63355	6.67181	6.91041	5.98117	7.6896	6.14772	7.23663	5.06716	6.89288	6.42	6.7712	6.5549	7.11277	6.22987	55723	CIA-II
SLC39A13	solute carrier family 39 (zinc transporter)_ member 13	-1.45406	-0.540085	0.002974	0.038801	7.6586	1	7.92418	6.84066	7.78914	6.63415	8.21197	6.91309	7.3366	7.791	8.02155	7.56982	7.55352	6.2519	7.87595	5.69449	7.82924	6.52084	7.82356	7.65485	8.35981	7.90514	7.98833	7.57681	7.79236	7.93994	7.81374	7.2135	8.41309	7.65535	7.66376	8.05859	91252	-
CCRN4L	nocturnin	-1.45367	-0.539699	0.00116	0.018946	6.3771	2	7.09119	5.86449	7.00249	5.27869	6.34234	5.88448	6.18745	6.70218	6.45179	6.47335	6.03669	5.83838	6.42619	5.12339	5.95092	5.27109	6.70904	5.7614	6.79304	5.82574	6.88362	5.9618	7.0144	6.40623	6.54719	6.31261	6.73308	6.29741	6.88997	6.98185	25819	CCR4L, CCRN4L, CCR4C, NOC, NOCT
TTC7B	tetratricopeptide repeat domain 7B	-1.45187	-0.537911	0.003711	0.04582	6.0354	2	6.38585	4.77394	6.30906	5.18181	6.6367	5.2492	6.93379	6.37137	6.60463	5.87245	5.73471	5.54169	6.36799	4.86861	6.36012	5.2364	6.38004	5.6466	6.40713	5.52861	6.1413	4.99971	5.77677	5.70844	6.21026	5.8829	6.01363	6.70785	5.76101	6.78922	145567	TTC7L1, C14_5685
APMAP	adipocyte plasma membrane associated protein	-1.45082	-0.536867	0.001592	0.024274	9.5202	1	9.12035	9.40352	8.93755	9.39878	10.1774	9.29085	9.90191	9.34346	10.2509	9.41607	10.3326	9.27294	10.2689	9.2913	10.3652	9.37172	10.0787	9.1533	10.1663	9.25218	8.6349	9.21231	9.37882	9.10209	9.22398	9.23915	8.94756	8.20271	9.02148	8.93884	57136	BSCV, C20ORF3
FEN1	flap structure-specific endonuclease 1	-1.44965	-0.535702	0.001471	0.022912	8.2964	1	9.30896	7.67023	8.86673	8.35352	8.7116	7.72968	7.88274	8.66672	7.93991	8.07536	7.52605	7.41288	8.16965	7.29078	8.27251	7.36826	8.10881	7.99699	8.17367	7.96732	8.81905	8.06292	8.98317	7.61581	9.04936	8.4246	8.274	8.20667	8.91821	8.2901	2237	FEN-1, MF1, RAD2
PDSS1	prenyl (decaprenyl) diphosphate synthase_ subunit 1	-1.44942	-0.535476	0.000264	0.005978	6.0833	2	6.21691	5.84181	6.95776	5.96234	6.61229	6.19738	6.41584	5.5397	6.25263	6.18213	7.12968	5.75965	6.20469	5.82331	6.46001	6.26955	6.31249	5.36128	6.4673	5.58258	5.72555	6.20042	5.86824	5.31396	5.86936	5.29347	6.15488	5.92734	5.7277	5.30409	23590	COQ1, COQ10D2, DPS, SPS, TPRT, TPT, TPT 1, HDPS1
AVPI1	arginine vasopressin-induced 1	-1.44942	-0.535473	0.000169	0.004305	8.3491	1	8.67293	7.98169	7.94623	7.42295	8.97597	7.46686	8.02454	8.56202	8.93031	8.19286	8.11072	7.67128	8.47549	7.54233	8.09052	7.83041	8.6827	8.00865	8.72281	7.9908	8.56088	8.18889	8.85208	8.46921	8.08608	8.30517	8.81699	8.12542	9.27889	8.41221	60370	PP5395, VIP32, VIT32
GLO1	glyoxalase I	-1.44827	-0.534328	0.001454	0.022678	10.2705	1	9.98541	9.84109	10.3054	9.85665	10.9337	9.76561	10.9854	9.78145	10.9838	9.63682	11.3266	10.3094	10.9805	10.5841	10.8794	10.5727	10.6448	9.85949	10.1771	9.93906	9.84197	10.0472	9.74286	9.71277	10.0144	9.72436	9.37636	9.66874	10.0524	9.72319	2739	GLOD1, GLYI, HEL-S-74
CD44	CD44 molecule (Indian blood group)	-1.44794	-0.534002	0.001371	0.021583	12.267	1	11.8633	11.7897	11.884	11.8529	12.4252	11.8989	12.8719	12.2507	13.1745	12.2718	12.9429	12.0579	12.9616	11.7633	13.0469	11.8057	12.82	11.6862	13.226	11.9182	11.9932	11.9581	11.6288	11.9088	11.8124	11.9421	11.7854	11.9713	11.4018	12.2299	960	CDW44, CSPG8, ECMR-III, HCELL, HUTCH-I, IN, LHR, MC56, MDU2, MDU3, MIC4, PGP1
ST6GALNAC4	ST6 (alpha-N-acetyl-neuraminyl-2_3-beta-galactosyl-1_3)-N-acetylgalactosaminide alpha-2_6-sialyltransferase 4	-1.44781	-0.533868	0.000335	0.007172	7.7424	1	8.28759	7.013	7.94623	7.0818	8.33641	6.96261	8.08557	8.28447	8.40456	7.04081	7.97512	7.16815	7.99992	7.02215	8.0304	7.17114	7.46142	7.41874	7.80529	7.57765	7.21923	7.76351	7.96286	7.79714	8.16163	8.14396	7.77086	6.61566	8.0615	7.55923	27090	IV, SIAT3-C, SIAT3C, SIAT7-D, SIAT7D, ST6GALNACIV, ST6GALNAC
ZNF511	zinc finger protein 511	-1.44583	-0.531894	1.18e-05	0.000563	7.3138	1	7.77463	6.72146	7.99685	7.07283	7.88515	6.59917	7.08756	6.86947	7.50458	6.63211	7.91816	6.37586	7.60073	6.94874	7.4838	7.11495	7.58106	7.40703	7.24892	7.21723	7.66625	7.34485	7.44409	7.40836	7.09138	6.77497	6.97002	7.13058	7.78207	7.30374	118472	-
C4orf46	chromosome 4 open reading frame 46	-1.44508	-0.531151	0.002336	0.032039	5.3817	2	6.0845	4.95394	6.44491	4.84468	4.99491	5.21691	5.50392	5.04459	5.98768	5.54758	5.44322	5.28484	4.55083	5.31086	5.46567	5.57862	6.13617	4.57404	4.79444	5.20073	5.38776	4.73974	5.72877	4.39337	6.22911	5.31836	5.05652	5.42832	5.65867	4.78971	201725	RCDG1
ANLN	anillin actin binding protein	-1.44506	-0.531128	6.21e-05	0.001967	7.6516	1	8.42855	7.38658	7.95763	7.89481	7.62334	7.63512	8.11188	7.77703	7.34013	7.54152	7.51212	7.1451	7.87595	6.88128	7.73931	6.44691	7.72828	7.1713	7.92171	7.02272	8.2927	7.21639	7.64497	6.85907	8.31067	7.58567	7.83225	7.71211	7.76575	7.44124	54443	FSGS8, SCRAPS, SCRA
NAB2	NGFI-A binding protein 2 (EGR1 binding protein 2)	-1.44499	-0.531059	0.001249	0.020031	8.4174	1	8.36574	8.25927	7.46884	7.89481	9.19111	8.10088	8.99197	8.4044	8.98917	8.6373	8.62926	7.78497	9.06094	7.34186	8.87715	7.07624	8.83489	8.15233	9.16573	7.69254	8.27737	8.05936	8.16126	8.34428	7.84463	8.11229	8.57269	8.52762	8.49182	8.55918	4665	MADER
MCM5	minichromosome maintenance complex component 5	-1.44438	-0.530446	3.71e-06	0.000237	8.4148	1	9.04663	7.92886	8.6554	8.62321	9.04143	8.12718	8.76621	8.19976	8.68071	8.56602	8.42882	8.04775	8.70673	7.57319	8.61593	7.3842	8.32647	8.2141	8.79269	8.02043	8.72428	8.03054	8.72937	8.2075	8.4894	8.27688	7.77086	8.16255	8.75004	8.05323	4174	CDC46, P1-CDC46
PRC1	protein regulator of cytokinesis 1	-1.44143	-0.527504	0.000241	0.005595	7.2665	1	7.73469	6.97181	7.1086	7.61455	7.56093	7.18752	7.94627	6.89556	7.83922	7.71376	7.20088	7.19831	7.73111	6.53759	7.6244	6.38491	7.71265	6.60164	7.8557	6.78255	7.50893	6.13424	6.88897	6.82764	7.22886	6.92836	7.36843	6.90574	6.90495	7.20099	9055	ASE1
WWTR1	WW domain containing transcription regulator 1	-1.44092	-0.526995	1.25e-07	1.52e-05	9.905	1	10.107	10.0045	10.6027	9.24342	10.1597	9.88214	10.1672	9.81715	10.2982	9.48458	10.4164	9.5494	10.1199	9.77686	10.188	9.8416	10.0196	9.35262	10.0985	9.65932	9.55262	9.7868	9.83075	9.3026	10.2484	9.49115	10.0099	8.96132	10.1341	9.70453	25937	TAZ
CECR5	cat eye syndrome chromosome region_ candidate 5	-1.43971	-0.525775	0.000475	0.009464	8.3722	1	9.03322	7.47768	9.2001	8.02154	8.9997	7.26061	7.86351	8.31701	8.3787	7.61941	8.44358	7.99717	8.54805	7.75108	8.54187	8.12404	7.97977	8.30523	7.80062	8.21238	8.29777	8.40918	8.69543	8.40411	8.98704	8.28952	8.61871	7.71766	9.01804	8.60746	27440	-
DCAF4	DDB1 and CUL4 associated factor 4	-1.43923	-0.525295	1.35e-10	5.37e-08	7.0234	1	7.44178	6.65795	7.50815	6.65836	7.15901	6.75344	7.03352	7.01936	7.46212	6.77511	7.3571	6.64039	7.28569	6.56241	7.408	6.74716	7.38457	6.82044	7.47094	6.5036	6.53412	6.71687	7.12979	6.72048	7.27495	6.66284	7.16395	6.7945	7.17589	7.12138	26094	WDR21, WDR21A
CMSS1	cms1 ribosomal small subunit homolog (yeast)	-1.43915	-0.525212	5.84e-05	0.001865	7.1165	1	7.59159	6.25627	7.76986	6.53303	7.37028	6.59917	7.29127	7.38121	7.21419	6.70538	7.46228	6.59576	7.46851	6.82084	7.32211	7.08602	6.95035	6.9144	6.62357	6.62858	7.65048	7.19058	7.07325	6.53831	7.79488	7.10324	6.7459	7.23497	7.63709	6.35696	84319	C3ORF26
CCDC28B	coiled-coil domain containing 28B	-1.4389	-0.524966	0.000361	0.007646	5.6633	2	5.74759	5.15134	6.09856	5.30959	6.73042	5.4006	5.60001	5.4949	6.08684	5.00032	6.28626	5.25645	6.29491	4.94611	6.08213	5.46335	5.2316	5.43231	4.97111	5.66827	5.78455	6.05059	6.13085	5.40196	5.82047	5.18939	5.57043	5.65367	5.62288	5.19165	79140	-
FAM207A	family with sequence similarity 207_ member A	-1.43874	-0.524809	0.002834	0.037324	7.2844	1	7.86487	6.41836	7.86982	6.38131	8.22007	6.44046	6.69358	7.80483	7.4247	6.43694	7.6329	6.95502	7.74946	6.37895	7.6244	7.02635	6.56555	6.95517	6.96152	6.98981	6.93662	7.62097	7.45888	7.18473	7.58407	7.62111	7.39308	6.50438	8.0413	7.01527	85395	C21ORF70, PRED56
HAUS8	HAUS augmin-like complex_ subunit 8	-1.43796	-0.524028	0.000385	0.008041	5.8152	2	6.50289	4.77394	6.50832	5.42697	6.59993	5.66273	5.35765	5.74496	5.86266	5.63591	5.38327	5.56503	6.06515	4.78671	5.93558	5.49305	5.86157	6.04438	5.96472	5.78028	6.20748	5.69423	6.09343	5.61947	6.19116	5.45931	5.88048	6.07312	6.23408	4.56743	93323	DGT4, HICE1, NY-SAR-48
TMCC3	transmembrane and coiled-coil domain family 3	-1.43652	-0.522574	0.000267	0.006041	7.9734	1	7.75661	7.74549	7.2819	7.42295	8.38045	7.87124	8.57611	7.7817	8.78283	8.20734	8.21329	7.08985	8.3337	7.5298	8.09052	7.81286	8.557	7.59935	9.00043	7.44311	8.08539	7.40783	7.7144	7.95092	7.53188	7.69899	7.81411	7.63788	8.10755	7.78268	57458	-
SLC25A1	solute carrier family 25 (mitochondrial carrier; citrate transporter)_ member 1	-1.43622	-0.522276	0.000576	0.010975	10.7253	1	10.7012	10.1921	10.5387	10.5299	11.8959	10.2643	11.1984	10.5171	11.5191	10.4618	11.301	10.6892	11.4737	10.5841	11.3173	10.557	10.5651	10.3727	10.9475	10.1149	10.514	10.4549	10.5211	10.4636	10.181	10.6159	9.94331	10.3015	10.4004	10.2344	6576	CTP, D2L2AD, SEA, SLC20A3
MAPKAPK3	mitogen-activated protein kinase-activated protein kinase 3	-1.43511	-0.521164	0.001737	0.025691	9.9634	1	9.90344	9.13626	9.75022	9.00938	10.8468	9.21114	10.8127	9.88057	10.966	9.32932	10.6851	9.56973	10.341	9.6187	10.4439	9.52151	10.0613	9.88609	10.0803	9.89974	9.66485	10.0154	9.46376	9.8925	9.45973	10.0805	9.32817	9.30729	9.88874	10.0771	7867	3PK, MAPKAP-K3, MAPKAP3, MAPKAPK-3, MK-3
C11orf63	chromosome 11 open reading frame 63	-1.43501	-0.521057	0.002113	0.02976	6.1966	2	5.4396	5.18777	6.62735	5.1134	7.0632	5.6865	6.70227	6.00669	6.84077	6.50888	6.7211	6.03505	6.61816	5.88365	6.69684	5.55066	6.58857	6.1605	6.91041	5.60013	6.02376	5.38836	5.67912	6.17601	5.76987	5.99521	6.03468	6.35557	5.97488	6.37424	79864	-
NT5C	5'_ 3'-nucleotidase_ cytosolic	-1.43487	-0.52092	2.47e-06	0.000169	9.3562	1	9.35998	8.90963	9.62886	8.63241	10.3396	8.82597	9.20406	9.39923	9.71557	8.91172	9.82067	8.87336	9.74899	8.41442	9.48566	8.96339	9.21378	9.15154	9.55494	9.1679	9.52909	9.39014	9.42286	9.21268	9.54307	9.20285	9.45847	9.50172	9.55537	9.07977	30833	DNT, DNT1, HEL74, P5N2, PN-I, PN-II, UMPH2, CDN, DNT-1
SPAG4	sperm associated antigen 4	-1.43482	-0.520865	0.001501	0.023245	7.2922	1	7.07964	6.57786	7.6414	6.24408	7.49569	6.79777	6.57564	6.51292	7.16964	6.41214	7.98019	7.06551	7.60577	7.28334	7.12653	7.95832	7.15702	7.41874	7.16419	6.89346	7.65048	7.13074	8.29088	7.28071	7.39667	6.8537	7.9477	6.92507	7.93585	6.77628	6676	CT127, SUN4
HAUS7	HAUS augmin-like complex_ subunit 7	-1.43355	-0.519595	5.43e-06	0.000313	6.2976	2	6.74876	5.95182	6.64156	6.46604	6.93127	5.63856	6.2241	6.25528	6.23832	5.9776	6.65924	5.91304	6.67687	5.96037	6.79363	6.21714	6.02241	5.74289	6.35711	6.09695	6.1637	6.06487	6.59974	5.9755	6.85697	6.59316	6.56967	5.67666	6.47397	5.47396	55559	UCHL5IP, UIP1
CDK4	cyclin-dependent kinase 4	-1.43304	-0.519077	7.74e-05	0.002356	9.6603	1	10.2165	8.94465	10.3176	9.40237	10.4147	8.79623	9.47887	9.66115	9.91315	9.2139	10.1137	9.08794	10.1409	9.26318	9.89061	9.30633	9.61939	9.68626	9.20691	9.60603	9.29801	9.77382	9.94282	9.39395	9.77885	9.61811	9.35978	8.75802	10.1531	9.57978	1019	CMM3, PSK-J3
NLN	neurolysin (metallopeptidase M3 family)	-1.43132	-0.517344	0.000161	0.004173	8.0641	1	8.50177	6.94012	8.416	7.51863	8.15817	6.80865	8.45799	8.47242	8.3787	7.51264	8.02011	7.55371	8.32149	7.33467	8.40653	7.20741	8.16351	7.90425	8.18088	7.98078	8.76514	7.94819	8.0727	7.84894	8.35426	8.10873	8.00214	8.18678	8.2375	8.27178	57486	AGTBP, EP24.16, MEP, MOP
C18orf21	chromosome 18 open reading frame 21	-1.43108	-0.517102	0.0007	0.012837	7.226	1	6.87439	7.22067	7.30887	6.97983	8.16238	7.128	7.42846	6.44388	7.79591	6.84163	8.23889	7.11379	7.81191	7.19878	7.56581	7.43097	7.69153	6.53865	7.35467	6.90056	6.56811	6.97308	7.16629	6.58605	6.83252	6.8017	6.7071	7.13058	7.39332	6.52106	83608	HST3108, PNAS-124, PNAS-131, XTP13
CCP110	centriolar coiled coil protein 110kDa	-1.43057	-0.51659	0.000125	0.003378	6.3181	2	6.42289	5.47989	7.44473	6.25999	6.41471	5.90489	6.43681	6.3337	6.22387	5.50131	6.25315	5.77974	5.98997	5.86382	6.55344	6.06729	6.13617	6.46151	6.58062	6.07201	6.11854	6.00688	6.82192	5.9755	6.92792	6.49833	6.7712	6.03804	6.79667	6.04807	9738	CP110, CEP110
CCDC77	coiled-coil domain containing 77	-1.42904	-0.515051	4.22e-06	0.000262	5.8155	2	6.22742	5.11396	6.66957	5.94276	6.20216	5.42906	5.91598	5.85541	6.07078	5.50131	5.97709	5.83838	5.80934	5.25103	6.096	5.52214	6.10457	5.3368	6.15238	5.65153	6.27076	5.81744	5.77677	5.19583	5.76987	5.54616	5.5116	5.80744	6.23408	5.19165	84318	-
TFEB	transcription factor EB	-1.42854	-0.514541	0.00073	0.0132	7.7566	1	7.59159	7.36288	7.12891	7.57058	8.53455	7.315	8.05199	7.80024	8.6965	7.5642	8.28468	7.81449	8.32455	7.5044	8.17461	7.74661	8.02689	7.22563	8.66489	6.99646	7.39993	7.44652	7.61887	7.56429	7.0282	7.44018	7.66687	7.17163	7.44548	7.37413	7942	ALPHATFEB, BHLHE35, TCFEB
QPCTL	glutaminyl-peptide cyclotransferase-like	-1.42845	-0.514446	7.31e-05	0.002245	7.7057	1	7.48181	7.14856	8.20255	7.04555	8.06231	7.06591	7.75498	7.38735	7.88586	6.69514	8.54626	7.19083	8.18994	7.34901	8.10431	8.0157	7.64835	7.80515	7.73849	7.62985	7.08484	7.53125	7.77474	7.64315	8.25197	7.64098	7.90834	7.52837	8.0413	7.16174	54814	GQC
NUDCD2	NudC domain containing 2	-1.42407	-0.510016	4.46e-06	0.000274	8.2725	1	8.37049	7.9017	8.72044	8.19292	8.88974	7.75238	8.11514	8.09108	8.81211	7.74884	8.90721	8.04775	8.65899	8.19783	8.7315	8.52706	8.47287	7.89171	8.23034	7.96732	7.7866	8.1725	8.41741	7.9582	8.42546	7.99369	8.13962	7.33232	8.52613	7.82727	134492	-
C16orf74	chromosome 16 open reading frame 74	-1.4235	-0.509443	0.000165	0.004246	8.5787	1	8.79977	8.03266	9.08002	8.11634	9.58685	7.61667	8.50591	8.43733	8.8874	7.83533	9.39102	7.98856	8.93231	8.1495	8.82606	8.5971	8.83248	8.52697	8.75456	8.13322	8.40977	8.79487	8.54763	8.33872	8.45378	8.49725	8.12987	8.6748	8.38902	8.23915	404550	-
FPGS	folylpolyglutamate synthase	-1.4232	-0.509139	1.37e-06	0.000109	8.6756	1	8.99069	8.14347	8.93178	8.45375	9.45579	8.1909	8.59489	8.70656	9.05188	8.05948	8.91252	8.07239	9.06094	7.82986	8.961	8.06101	8.61982	8.69284	9.01663	8.60896	8.56088	8.81403	8.68918	8.56763	9.00356	8.73302	8.75176	8.20271	8.84242	8.37836	2356	-
PSME4	proteasome activator subunit 4	-1.42245	-0.508374	0.001236	0.019875	9.0366	1	8.69581	8.51365	8.6589	8.78863	9.47622	8.82061	9.94279	9.1348	9.82494	8.84843	9.54604	8.80639	9.63763	8.60568	9.64508	8.3719	9.49694	8.57746	9.75289	8.58272	8.84354	8.563	8.44367	8.6819	8.74327	8.98309	8.47214	8.42949	8.50171	9.28094	23198	PA200
RFC2	replication factor C (activator 1) 2_ 40kDa	-1.42173	-0.507649	1.14e-08	2.14e-06	8.3407	1	8.65164	8.26354	8.70022	8.21349	8.87954	7.91214	8.33213	7.85887	8.9806	8.03938	8.8166	8.14	8.6468	8.20573	8.51632	8.2424	8.72747	8.22748	8.3015	7.90867	8.43301	8.01959	8.40219	7.84502	8.40073	8.03931	7.89113	7.73967	8.63346	8.22494	5982	RFC40
PFN1	profilin 1	-1.4214	-0.507311	0.000467	0.009334	13.1456	1	13.4421	12.0053	13.4912	12.2973	14.0488	11.9856	13.1176	13.2458	13.4663	12.3414	13.7176	12.6636	13.6381	12.5689	13.5173	12.8442	13.0538	13.0511	13.0825	12.964	13.4482	13.1615	13.1461	13.1959	13.043	13.2928	12.6887	13.3025	13.291	13.0507	5216	ALS18
CBX3	chromobox homolog 3	-1.42111	-0.50702	3e-08	4.65e-06	10.3387	1	10.5794	9.93115	10.9106	9.83823	10.6435	9.68234	10.1585	10.2135	10.6654	9.60161	10.9928	9.90991	10.4835	10.2506	10.6518	10.3925	10.486	10.2222	10.262	10.1339	10.5717	10.2953	10.4508	9.99598	10.5976	10.1235	10.2616	10.295	10.6386	9.73828	11335	HECH, HP1-GAMMA, HP1HS-GAMMA
TOMM34	translocase of outer mitochondrial membrane 34	-1.41993	-0.505816	0.001936	0.027806	8.0042	1	7.66298	7.54242	7.8516	7.9885	8.99025	7.29967	8.77241	7.76765	8.74285	7.56982	8.36825	8.0926	8.68782	7.98939	8.76877	8.03096	8.27061	7.63491	8.42499	7.84385	7.64252	7.55167	7.59898	7.34317	7.42965	7.95849	7.30054	7.39606	7.58223	7.55165	10953	HTOM34P, TOM34, URCC3
FANCC	Fanconi anemia_ complementation group C	-1.41899	-0.504865	3.7e-05	0.001335	5.6602	2	6.0845	5.38893	5.42897	5.0416	5.89325	5.48436	6.12422	5.78272	6.14936	5.83562	6.03669	4.47712	6.06515	5.28126	6.02528	5.08865	6.0054	5.60622	6.03003	5.74915	6.22888	5.27008	5.27343	5.40196	5.48623	5.18939	5.85704	5.67666	5.6936	5.40839	2176	FA3, FAC, FACC
ELOVL5	ELOVL fatty acid elongase 5	-1.41858	-0.504451	0.000256	0.005845	8.5667	1	8.85331	7.79356	8.7568	7.67513	8.30248	8.09645	9.22982	8.6361	8.99769	7.93444	9.08241	7.83383	8.76201	7.90457	9.07917	7.70281	8.77592	8.36091	9.17298	8.61545	8.27737	8.68821	8.58181	8.52417	8.68643	8.69314	8.51395	7.99427	8.58313	8.98455	60481	HELO1, SCA38, DJ483K16.1
STIL	SCL/TAL1 interrupting locus	-1.41765	-0.503504	0.00106	0.017829	5.9392	2	5.89983	5.64622	6.82708	5.88238	5.55193	6.02163	6.80261	5.90762	5.52822	5.57018	5.87193	5.22748	5.86089	5.39618	6.16341	5.27109	5.4485	5.7614	6.34433	5.79559	6.55121	5.57954	6.05501	5.79225	6.63463	5.45931	6.33534	6.36975	6.11029	4.93649	6491	MCPH7, SIL
PRR5	proline rich 5 (renal)	-1.41562	-0.501433	0.000502	0.00985	8.1337	1	7.87158	7.86842	7.73052	7.84295	9.36738	7.78578	8.44511	8.08353	8.53906	7.86304	8.49406	8.17075	8.76652	8.06082	8.67718	8.16612	8.00993	7.64989	8.60185	7.51426	8.1429	7.75913	7.44409	7.38696	8.0757	7.88542	8.0546	8.11704	8.21963	7.44124	55615	FLJ20185K, PP610, PROTOR-1, PROTOR1
CDCA8	cell division cycle associated 8	-1.41511	-0.500911	8.51e-05	0.002533	6.5781	2	7.19653	6.30684	6.68337	6.83866	6.78604	5.98376	7.02662	6.5895	6.40131	6.58851	6.25315	6.49	6.93915	6.55005	6.75044	5.65941	6.57711	6.33129	7.00277	6.05938	7.29222	6.20042	6.73953	5.54411	7.07063	6.57262	6.24793	6.17354	6.90495	6.30386	55143	BOR, BOREALIN, DASRAB, MESRGP
NCAPH2	non-SMC condensin II complex_ subunit H2	-1.41445	-0.500239	1.57e-05	0.000701	9.339	1	9.4889	8.75128	9.44257	8.94441	9.8844	8.63759	9.2973	9.24036	9.76631	8.94452	9.7045	8.62396	9.62278	8.40415	9.34321	8.74633	9.33277	9.14979	9.7062	9.26049	9.16554	9.28121	9.26142	9.43755	9.71508	9.19279	10.1635	9.38788	9.31859	9.44933	29781	CAPH2
UBE2T	ubiquitin-conjugating enzyme E2T	-1.41267	-0.498421	0.001163	0.018964	7.0492	1	7.26441	7.37082	7.68322	7.37993	7.37754	6.96261	6.78637	6.32092	7.18464	6.50888	7.77384	6.93724	7.55451	7.11736	7.65282	7.4538	7.58106	6.42714	7.21422	6.427	6.78592	6.55429	7.12052	6.29571	7.36293	6.37326	6.49571	6.54243	6.84407	6.11125	29089	FANCT, HSPC150, PIG50
PLRG1	pleiotropic regulator 1	-1.41245	-0.4982	0.000894	0.015542	8.9245	1	8.58581	8.52437	8.72378	8.59527	9.51953	8.69439	9.55876	8.62315	9.63047	8.96598	9.75564	8.80884	9.5747	9.08192	9.55256	9.09023	9.27716	8.33333	9.30581	8.29283	8.67444	8.47215	8.5614	8.53394	8.3882	8.21195	8.31329	8.49241	8.72494	8.67174	5356	CWC1, PRL1, PRP46, PRPF46, TANGO4
WDYHV1	WDYHV motif containing 1	-1.41161	-0.49734	1.31e-05	0.000604	6.5583	2	6.90088	6.56406	6.78928	6.32192	7.21682	5.94486	6.86583	6.39595	6.74281	5.81685	7.00591	6.49	6.82265	6.64607	6.81894	6.70972	6.84911	6.40377	6.53636	6.29314	6.38956	6.39384	6.70273	6.16348	7.12196	6.48739	6.21143	5.42832	6.73093	5.9362	55093	C8ORF32
FXN	frataxin	-1.40664	-0.492256	0.00045	0.009071	6.2787	2	6.77764	5.79534	7.09833	5.75346	6.75293	5.4006	6.17502	6.22816	6.10273	5.85415	6.47044	6.1932	6.00532	5.97893	6.69684	6.02726	5.72276	6.20175	5.93093	6.27139	7.0371	6.18742	6.33702	5.54411	6.96213	6.30017	6.22979	6.38379	6.73093	5.81491	2395	CYAY, FA, FARR, FRDA, X25
ERCC1	excision repair cross-complementation group 1	-1.40593	-0.491527	0.002408	0.032725	9.4303	1	9.43214	8.62079	9.46672	8.02619	10.5598	8.44895	9.40763	9.33395	9.96077	8.67427	10.006	8.77671	9.99857	8.76921	9.59835	8.95541	9.38467	9.54651	9.30581	9.60603	9.0886	9.75743	9.4115	9.71384	9.49715	9.43962	9.52505	9.1823	9.59517	9.27865	2067	COFS4, RAD10, UV20
ZWINT	ZW10 interacting kinetochore protein	-1.40516	-0.490736	8.88e-07	7.45e-05	7.6175	1	8.20761	7.41759	8.24969	7.69281	7.82269	7.48731	7.51973	7.12604	7.47438	7.39734	7.8478	7.43838	7.78991	7.33467	7.69444	7.12447	7.69153	7.2389	7.73359	7.00965	7.67407	7.18405	7.9732	7.22751	8.41726	7.53348	7.50287	7.72871	7.76575	7.19128	11130	HZWINT-1, KNTC2AP, SIP30, ZWINT1
SNAPC1	small nuclear RNA activating complex_ polypeptide 1_ 43kDa	-1.40258	-0.488084	0.00069	0.012661	6.6703	2	6.61914	6.46364	7.1086	6.63415	6.96057	6.59917	6.70227	5.32613	7.34681	6.29495	7.30957	6.52612	7.03202	6.84127	7.16651	7.36023	6.93246	6.10361	6.6341	5.95413	6.64972	6.37104	6.58634	6.24902	6.84479	5.91589	6.33534	6.34124	7.00567	6.26734	6617	PTFGAMMA, SNAP43
KLHL42	kelch-like family member 42	-1.40218	-0.487667	1.35e-05	0.000618	7.179	1	7.16955	6.9294	7.1086	6.79565	7.50235	6.87222	7.92417	6.85181	7.81532	7.2014	7.4767	6.77658	7.45179	6.82084	7.55078	7.23403	7.26816	6.66199	7.64778	6.87916	6.40844	6.74375	7.24518	6.88221	7.81374	7.03731	7.03412	7.0448	7.07353	7.01527	57542	CTB9, KLHDC5
CALD1	caldesmon 1	-1.40179	-0.487272	0.001018	0.017244	9.7302	1	9.82087	8.9684	9.9245	9.16744	10.074	8.93667	10.0264	10.1544	10.0969	9.35882	9.91102	8.90113	9.9508	8.5447	10.1569	8.59024	9.66884	9.27584	10.0021	9.5753	10.0917	9.43893	9.59003	9.43625	10.2275	9.74171	9.99657	10.201	9.7105	10.1838	800	CDM, H-CAD, HCAD, L-CAD, LCAD, NAG22
HLCS	holocarboxylase synthetase (biotin-(proprionyl-CoA-carboxylase (ATP-hydrolysing)) ligase)	-1.39987	-0.48529	0.000176	0.004452	6.5779	2	6.32846	6.22155	7.15886	6.53303	6.8396	6.27783	7.10731	6.03826	7.18464	6.70538	6.51303	6.47775	6.78756	5.69449	7.28627	5.83198	6.56555	6.55995	7.32245	6.52213	6.87006	6.16108	6.25466	6.41683	6.54719	5.99521	6.38535	6.57951	6.43321	6.4897	3141	HCS
LAP3	leucine aminopeptidase 3	-1.39686	-0.482188	2.29e-05	0.000924	9.6961	1	9.93021	9.75569	9.97448	9.37159	9.97214	9.44688	9.53586	9.74365	10.1311	9.19221	10.1252	9.49576	10.0014	9.66671	9.99607	9.45706	9.85602	9.25966	10.0293	9.40353	9.2904	9.61182	9.45087	9.34067	10.1091	9.31066	10.0179	8.19477	10.1004	9.66472	51056	HEL-S-106, LAP, LAPEP, PEPS
C16orf95	chromosome 16 open reading frame 95	-1.39641	-0.481721	0.001802	0.026446	5.0252	2	5.3463	4.32822	5.69734	4.15449	5.44541	4.34755	4.83298	5.32613	5.61938	4.82353	5.41356	4.97213	5.07203	5.08964	5.23445	5.16442	4.82931	5.20778	5.06757	4.71259	4.66104	4.37734	5.40143	4.7015	5.42213	5.10607	4.45194	4.40747	6.05764	4.62629	100506581	-
MCM3	minichromosome maintenance complex component 3	-1.39253	-0.477704	1.42e-06	0.000111	8.5268	1	8.94368	8.0074	8.75025	8.77485	9.0184	8.31809	8.76621	8.23425	8.7147	8.97023	8.77638	8.2911	8.92628	7.89483	8.82398	7.87055	8.63649	8.12757	8.59107	7.9707	8.70149	8.00485	8.72632	8.04276	8.82609	8.34508	8.35572	8.36724	8.58313	8.33049	4172	HCC5, P1-MCM3, P1.H, RLFB
TTPAL	tocopherol (alpha) transfer protein-like	-1.39117	-0.476301	0.003998	0.048465	7.4947	1	7.32924	7.27247	6.77646	6.92101	8.17077	7.63512	8.73903	7.7051	8.16083	7.60307	7.8198	7.05731	8.05997	6.93929	7.76124	6.97467	7.7742	7.14334	7.88688	7.39365	7.80097	7.12393	6.82192	6.83556	7.15191	7.08885	7.22015	7.1797	6.79667	7.33054	79183	C20ORF121
HOXD13	homeobox D13	-1.3891	-0.474154	0.003123	0.040247	6.116	2	6.74145	4.95394	6.23602	5.14801	5.57738	5.21691	6.43681	6.15805	6.03812	5.77856	6.38129	4.97213	6.41474	6.03321	6.24035	5.27109	6.67717	6.18813	5.99774	5.88422	6.29125	6.16108	6.51737	5.88678	6.85697	6.68214	6.15488	6.32678	6.34808	6.09049	3239	BDE, BDSD, HOX4I, SPD
ACD	adrenocortical dysplasia homolog (mouse)	-1.38522	-0.470114	1.2e-05	0.00057	7.1599	1	7.4006	6.60505	7.06708	6.55899	7.74622	6.54818	7.30274	7.3054	7.34681	7.40992	7.19217	6.49	7.6504	6.66911	7.05023	6.80749	7.37135	7.12202	7.7627	6.97644	7.02492	7.04688	7.25369	7.1597	7.44585	6.86219	7.66687	6.62751	7.23636	7.07987	65057	PIP1, PTOP, TINT1, TPP1
PLK3	polo-like kinase 3	-1.38307	-0.467874	0.001866	0.027119	8.2509	1	8.16726	8.23336	7.99685	7.69866	8.67081	7.8556	8.19424	8.56202	8.56795	8.11047	8.13819	6.64039	8.42216	7.62714	7.93332	7.48368	8.48213	7.75523	8.71539	8.14223	8.37179	7.86494	8.10596	8.18907	8.74655	7.98205	9.25159	8.5589	8.73336	8.24386	1263	CNK, FNK, PLK-3, PRK
POLA2	polymerase (DNA directed)_ alpha 2_ accessory subunit	-1.38232	-0.467087	2.08e-05	0.000859	7.1209	1	7.57524	6.70898	7.71044	7.27424	7.48901	6.80865	7.18992	6.46726	7.412	6.70538	7.5603	7.15282	7.6108	6.77909	7.55581	6.59117	7.10208	7.21224	6.93619	6.95614	7.09653	6.85477	7.38337	6.76264	7.31961	7.17994	6.43368	6.65093	7.36109	6.75005	23649	-
S100A13	S100 calcium binding protein A13	-1.38118	-0.4659	0.000763	0.013749	8.6929	1	8.45784	8.46252	9.16855	8.34608	9.53097	8.15301	8.24268	8.37069	8.84789	7.45917	9.51669	8.54106	9.1326	8.61461	9.06337	9.03073	8.88457	8.5511	8.64678	8.5959	8.2927	8.79487	8.96516	8.48944	8.80426	8.45017	8.56909	8.03488	8.86941	8.07453	6284	-
MCM6	minichromosome maintenance complex component 6	-1.38055	-0.465247	0.001995	0.02848	7.621	1	7.93704	7.46289	7.57631	8.18043	7.94502	7.82914	8.00361	7.06605	8.04229	7.78309	8.3566	7.64961	8.11762	7.55476	8.25407	7.31107	8.06433	7.0181	8.02142	6.89346	7.5689	6.94246	7.31187	6.86683	7.50119	7.17994	6.90293	6.92507	7.31697	7.07987	4175	MCG40308, MIS5, P105MCM
RAD18	RAD18 E3 ubiquitin protein ligase	-1.37746	-0.462015	0.002023	0.028775	5.7867	2	5.9387	5.4199	5.72429	6.1618	5.60238	6.02163	5.90096	5.62534	6.69122	5.29975	6.44133	5.6106	6.47111	5.64886	6.12334	5.76053	6.38004	5.36128	6.23779	5.86982	6.02376	5.114	4.97733	5.35863	5.86936	5.29347	5.35309	5.22494	5.65867	5.19165	56852	RNF73
PRIM2	primase_ DNA_ polypeptide 2 (58kDa)	-1.3765	-0.461004	0.002198	0.03073	5.8244	2	6.56218	4.62247	6.32676	5.1134	5.62696	5.28077	5.56234	6.05379	6.0215	5.4776	6.01709	5.34	5.80934	5.55303	6.10973	5.20086	5.84254	6.14649	5.32342	5.68481	5.99906	5.94645	6.59974	5.4646	6.45411	6.04079	5.73377	5.34464	6.32599	5.81491	5558	PRIM2A, P58
PREP	prolyl endopeptidase	-1.37648	-0.460982	0.003175	0.040811	9.3217	1	9.10903	8.90963	8.72378	8.89687	9.92461	8.85511	10.023	9.09782	10.1504	9.42539	9.949	9.32513	10.0724	9.13873	9.96523	8.91211	9.51207	8.85889	9.85666	8.83145	9.25693	8.95488	8.75356	9.11354	8.60578	9.15874	8.6429	9.17827	8.96542	9.19119	5550	PE, PEP
IKBIP	IKBKB interacting protein	-1.37517	-0.459608	0.002311	0.031835	7.6372	1	7.98116	7.11111	8.6554	7.01775	7.39911	7.16231	7.25631	7.77235	7.67363	7.22295	7.88611	6.13201	7.78991	6.82084	7.60028	6.96411	7.48616	7.74597	7.64257	7.78752	7.8775	8.00114	8.17476	7.49094	8.0809	7.53348	7.96973	7.64373	7.85331	7.39966	121457	IKIP
RANBP1	RAN binding protein 1	-1.37257	-0.456878	6.01e-05	0.001915	9.8671	1	10.3171	9.35429	10.5799	9.64883	10.6061	9.19673	9.49645	9.93713	9.7947	9.27362	10.2225	9.54354	10.0485	9.54899	10.0487	9.79021	9.59685	9.66307	9.54241	9.75937	9.85407	9.77382	10.0529	9.48492	10.4006	9.8309	9.67332	9.6673	10.3397	9.58535	5902	HTF9A
MRPS6	mitochondrial ribosomal protein S6	-1.36994	-0.454117	0.000281	0.006299	8.7597	1	8.97519	8.25927	9.01328	7.75588	9.47622	8.00488	8.41372	8.88644	8.93253	7.89471	9.35245	8.2664	9.09183	8.55092	8.96856	8.81259	8.9326	8.69284	8.65198	8.60896	8.96968	9.01128	8.85208	8.3219	8.66236	8.61242	8.68011	8.9113	9.27889	8.4247	64968	C21ORF101, MRP-S6, RPMS6, S6MT
EIF2B3	eukaryotic translation initiation factor 2B_ subunit 3 gamma_ 58kDa	-1.36965	-0.453804	0.003779	0.046378	7.8286	1	7.92418	7.79946	8.39518	7.96927	8.19151	7.51413	7.64666	7.44737	8.22028	7.37826	8.82226	7.79488	8.32761	7.65625	8.42037	8.25978	8.08472	7.46464	8.25103	7.60398	7.3224	7.6963	7.62544	7.09517	7.71689	7.6161	6.86818	6.75183	7.80621	7.03712	8891	EIF-2B, EIF2BGAMMA
MASTL	microtubule associated serine/threonine kinase-like	-1.36947	-0.453614	4.17e-07	3.96e-05	6.9366	1	7.1309	6.86336	7.31774	6.99892	7.15901	6.91309	7.3254	6.6315	7.14684	7.04081	7.20088	6.45294	7.27307	6.51233	7.18609	6.67127	7.23935	6.74804	7.19299	6.79021	6.42708	6.70779	6.79886	6.54798	7.41326	6.58293	7.37669	6.63927	6.85953	6.26734	84930	GREATWALL, GW, GWL, MAST-L, THC2, HGWL
PA2G4P4	proliferation-associated 2G4 pseudogene 4	-1.36939	-0.453534	0.000728	0.013187	4.915	2	5.22574	4.72519	5.13962	4.08475	5.80983	4.46216	5.31298	4.80869	5.55156	4.62202	5.22146	5.04033	5.38535	4.34675	4.92828	5.08865	4.82931	4.94175	4.40896	4.3473	5.13916	4.50852	4.80285	4.98406	5.00739	4.67634	5.01476	4.9881	5.20552	4.78971	647033	PA2G4L1
PAGR1	PAXIP1 associated glutamate-rich protein 1	-1.3686	-0.452696	4.61e-05	0.001577	8.0816	1	8.30505	7.66378	8.44464	8.18043	8.95429	7.53392	7.90924	7.49365	8.42682	8.20373	8.12909	7.94029	8.5055	7.76183	8.5317	7.83621	8.01419	8.0431	7.97657	7.89806	8.36214	8.10153	8.30323	7.84109	8.09639	7.58053	7.65332	7.86509	8.37833	7.32167	79447	C16ORF53, GAS, PA1
EXOSC8	exosome component 8	-1.36838	-0.452473	0.000114	0.00315	7.9698	1	8.2926	7.6573	8.76979	7.57058	8.03502	7.05682	7.96804	7.92369	7.89956	7.08855	8.20898	7.24963	8.00757	7.62124	8.15487	7.70281	7.8853	8.02789	7.95991	8.02368	7.94372	8.21474	8.16126	7.71362	8.58763	7.6459	8.19675	8.10438	8.39964	7.72998	11340	CIP3, EAP2, OIP2, PCH1C, RRP43, RRP43P, BA421P11.3, P9
TRIP13	thyroid hormone receptor interactor 13	-1.36634	-0.450321	0.001732	0.025646	6.893	1	7.76745	6.84066	7.60561	6.38131	6.78604	6.02163	6.98451	6.92962	7.06812	6.48529	6.63373	7.24963	6.65756	6.83109	6.83557	6.64506	7.11799	6.25497	6.29204	6.49425	7.24047	6.16108	6.82192	6.32976	7.58407	6.83657	7.24745	6.73001	7.2944	7.07987	9319	16E1BP
C20orf27	chromosome 20 open reading frame 27	-1.36595	-0.449905	0.001116	0.018468	7.9724	1	8.53809	7.26397	8.2818	7.51863	9.03915	7.55989	7.78391	8.42842	8.00051	7.56982	8.08742	7.61089	8.41067	7.45886	8.05901	7.44623	7.48001	7.75984	7.8736	7.66362	7.97572	7.95587	8.03372	7.789	8.25197	8.23174	7.75193	7.25038	8.52613	7.88265	54976	-
ADSL	adenylosuccinate lyase	-1.36548	-0.449404	0.000779	0.013961	8.7372	1	9.11752	8.37438	9.41388	8.58268	8.8667	8.18256	8.4477	8.38611	9.0641	8.21811	9.46519	8.29808	9.13784	8.83435	8.97044	9.07313	9.28423	8.5431	8.76418	8.63261	8.16527	8.63894	8.94691	8.43051	8.84455	8.7214	8.20141	7.54095	8.8846	8.39115	158	AMPS, ASASE, ASL
MTAP	methylthioadenosine phosphorylase	-1.36322	-0.447021	7.78e-06	0.000409	8.4946	1	8.75509	8.13416	8.44464	8.1207	8.98551	8.0786	9.0912	8.53461	8.82174	8.59385	8.93358	8.35275	8.62461	8.19386	8.91871	8.35179	8.53642	7.87905	8.92947	8.12415	8.53534	8.07708	8.12926	7.77671	8.71346	8.31448	8.5177	8.5181	8.28979	8.51703	4507	BDMF, DMSFH, DMSMFH, HEL-249, LGMBF, MSAP, C86FUS
TMEM237	transmembrane protein 237	-1.36197	-0.4457	0.002376	0.032449	7.0314	1	6.81294	7.1016	6.75047	6.97019	7.48901	7.25267	7.42846	6.52411	7.73096	7.00809	7.61997	7.09788	7.37113	6.84127	7.50474	7.20741	7.55207	6.25497	7.44124	6.92862	6.46365	7.04688	6.94257	6.52857	7.20048	6.42	6.84454	5.96519	6.91977	6.00435	65062	ALS2CR4, JBTS14
ST6GALNAC6	ST6 (alpha-N-acetyl-neuraminyl-2_3-beta-galactosyl-1_3)-N-acetylgalactosaminide alpha-2_6-sialyltransferase 6	-1.36147	-0.44517	0.001569	0.024032	8.4057	1	8.18623	8.13416	8.25894	7.87945	9.19932	8.01899	8.57374	8.50949	9.29938	8.08324	8.76468	7.62761	8.96016	7.55476	8.73372	7.97945	8.70394	8.4886	8.99431	8.21238	8.27223	8.31673	7.96804	8.33033	8.0809	8.49452	7.96425	7.90459	8.39434	8.48558	30815	SIAT7-F, SIAT7F, ST6GALNACVI
MRTO4	MRT4 homolog_ ribosome maturation factor	-1.35935	-0.442912	0.002634	0.035102	9.9232	1	10.4362	9.2908	10.9062	9.15898	10.319	9.13543	9.29299	10.0585	9.80323	9.16649	10.2374	9.37054	9.98895	9.53338	9.97371	9.6992	9.67288	10.0437	9.36554	10.0285	10.032	10.1285	10.2293	9.58348	10.4172	9.96993	9.79394	9.68867	10.5988	9.72487	51154	C1ORF33, MRT4, DJ657E11.4
PXN	paxillin	-1.35932	-0.442889	0.003473	0.043668	8.1313	1	8.05083	7.99203	7.83932	7.59587	8.75685	8.75467	8.47583	7.81398	8.45802	8.44899	7.53985	7.44469	8.5216	7.65625	8.01589	6.99556	8.3196	8.08044	8.82295	7.41859	8.15971	7.40783	8.54416	8.02554	8.06525	7.87707	8.81699	8.17875	8.13957	7.69603	5829	-
HMGB3	high mobility group box 3	-1.35829	-0.441787	0.000669	0.012368	8.0284	1	8.31493	7.36288	8.50418	7.61455	8.54103	7.41088	7.74661	8.40742	7.90863	7.56982	8.30097	7.50023	7.94525	7.49799	8.29372	7.74661	8.12465	7.57862	8.45205	7.79134	9.00112	7.79812	8.27007	7.77259	8.0757	8.23174	7.44902	8.11283	8.02768	7.9874	3149	HMG-2A, HMG-4, HMG2A, HMG4
TTC26	tetratricopeptide repeat domain 26	-1.35817	-0.441667	0.003492	0.043792	4.7921	2	4.67023	4.32822	4.96981	4.15449	5.10399	4.46216	5.33549	4.88012	4.73251	5.15779	5.58305	4.47712	5.38535	3.52101	4.79859	4.34101	4.97623	5.09555	4.93746	4.74451	4.72269	4.80925	5.33885	4.10956	5.38899	4.55593	4.57197	5.05983	4.68695	4.50606	79989	DYF13, DYF-13
CAMKK1	calcium/calmodulin-dependent protein kinase kinase 1_ alpha	-1.35739	-0.440834	0.001212	0.019605	7.1528	1	6.595	7.15778	7.61284	6.51988	7.56729	6.50872	7.59629	7.19068	7.54584	7.0569	6.87052	7.08985	7.29197	6.16871	7.3043	6.72231	7.36469	7.10762	8.14079	6.7593	7.48244	6.92691	6.59974	7.01372	7.21946	6.75688	7.33488	7.45045	7.25986	6.90072	84254	CAMKKA
TMEM107	transmembrane protein 107	-1.35713	-0.440557	0.001083	0.0181	7.186	1	7.11967	6.25627	7.29095	6.46604	7.86979	6.75344	6.91149	7.20466	7.68949	6.46132	8.01023	6.62937	7.69369	6.90088	7.36855	7.2943	7.20251	7.57862	7.1569	7.26753	7.27174	7.30329	7.4952	7.10831	7.22886	6.77497	6.9917	7.01804	7.23636	6.56686	84314	GRVS638, PRO1268
MTFMT	mitochondrial methionyl-tRNA formyltransferase	-1.35706	-0.440486	0.000899	0.015613	6.6315	2	7.01442	6.05404	7.07758	6.12752	7.49569	5.86378	6.90398	6.43204	7.31307	6.52052	7.12968	6.73603	6.95505	6.44718	7.10612	6.35288	6.75047	6.47279	6.59148	6.54949	6.11854	6.85477	6.27151	6.22509	6.63463	6.42	6.22979	6.12421	6.32599	6.5966	123263	COXPD15, FMT1
PQBP1	polyglutamine binding protein 1	-1.35656	-0.439954	2.35e-05	0.000939	9.1428	1	9.08612	8.76038	9.42008	8.97365	9.92088	8.55928	9.24476	8.84241	9.41997	8.61574	9.7333	9.07784	9.68845	8.95409	9.52848	9.21128	9.03044	8.8263	9.15663	8.90919	9.32559	8.94912	9.21208	8.73157	9.03871	8.97919	8.88809	9.38962	9.13065	8.53634	10084	MRX2, MRX55, MRXS3, MRXS8, NPW38, RENS1, SHS
PON2	paraoxonase 2	-1.35615	-0.439521	0.003471	0.043668	9.1468	1	8.57351	9.05231	8.76655	8.93453	9.39984	8.49679	9.62192	9.38088	9.53419	8.95314	10.011	8.6542	9.57342	8.75582	9.77468	8.93392	10.0312	8.68074	9.80279	9.18254	8.65085	8.94334	8.70166	8.71018	8.95058	8.75825	8.96958	8.93534	8.61536	8.97892	5445	-
SLC50A1	solute carrier family 50 (sugar efflux transporter)_ member 1	-1.35321	-0.436386	0.003404	0.043056	9.2575	1	9.09045	8.99692	9.28175	8.85559	10.0297	8.83663	9.51629	8.82668	9.89274	8.47616	10.1747	9.18152	9.83205	9.51124	9.74528	9.72602	9.4284	9.04037	9.27752	9.02741	8.70912	9.08145	9.10334	9.04686	8.83535	8.92756	8.74219	8.65756	9.29034	8.54017	55974	HSSWEET1, RAG1AP1, SCP, SWEET1, SLV
SPAG5	sperm associated antigen 5	-1.35304	-0.436209	0.002482	0.03351	6.8641	1	7.57112	6.50753	6.93486	7.28982	7.04507	6.66047	7.21442	6.90415	6.89651	7.18685	6.58133	6.59576	7.13332	5.50262	7.16651	5.78474	6.63355	6.82924	7.16419	6.4072	7.06117	6.33614	7.1842	5.94653	7.42147	6.8537	7.02363	6.84613	6.84407	6.80204	10615	DEEPEST, MAP126, HMAP126
AGTRAP	angiotensin II receptor-associated protein	-1.35248	-0.435607	0.00191	0.027566	9.8765	1	10.0138	8.94199	10.1033	9.62138	10.3265	8.93419	9.39563	9.98348	10.2774	9.12322	10.3918	8.93735	10.3342	8.95409	10.1643	9.50521	9.95901	9.98489	10.0648	10.0365	9.72257	10.0436	9.90553	10.2892	10.0373	9.93515	10.0218	9.49526	10.2369	9.68736	57085	ATRAP
KIF11	kinesin family member 11	-1.3523	-0.435416	0.000547	0.01052	7.0374	1	7.43726	6.59152	7.21696	7.28982	7.16741	7.2123	7.89036	6.86066	7.28551	7.17216	7.27699	7.2852	7.161	7.04875	7.28627	6.49172	6.91435	6.47279	7.29614	6.23815	7.35196	6.4163	7.21065	6.20076	7.22886	7.02979	6.7459	6.59166	6.94898	6.5966	3832	EG5, HKSP, KNSL1, MCLMR, TRIP5
PKNOX1	PBX/knotted 1 homeobox 1	-1.35091	-0.433935	0.000139	0.003702	6.8877	1	6.93332	6.40295	6.76352	6.50661	7.55454	7.07495	7.58694	6.76012	7.16208	6.78481	7.40312	6.78654	7.27307	6.84127	7.24951	7.04651	7.22473	6.48398	7.32245	6.66239	6.46365	6.4163	6.69025	6.4687	6.75659	6.59316	6.8205	6.52986	6.69691	6.42486	5316	PREP1, PKONX1C
CSGALNACT2	chondroitin sulfate N-acetylgalactosaminyltransferase 2	-1.35046	-0.433454	0.001964	0.028096	6.5	2	6.81294	6.53608	6.44491	5.84067	5.76624	6.02163	6.50789	6.50164	7.17716	6.95757	6.41162	6.2519	6.2697	5.84371	6.18951	5.90005	7.21736	5.98262	7.17866	6.00771	6.82861	6.33614	6.76356	6.27255	6.70365	6.1137	6.93686	6.61566	6.81264	6.47376	55454	CHGN2, GALNACT-2, GALNACT2, PRO0082
MRPL15	mitochondrial ribosomal protein L15	-1.34774	-0.430547	0.00166	0.024854	9.8145	1	10.1518	9.44738	10.5715	9.34013	9.91964	9.01151	9.29587	9.68253	9.8105	8.77496	10.5408	9.6927	9.92883	9.96199	9.91917	10.2497	9.92096	9.54518	9.68608	9.76424	9.50955	9.84175	10.0033	9.58935	10.295	9.50206	9.63766	9.22583	10.4331	9.40799	29088	HSPC145, L15MT, MRP-L15, MRP-L7, RPML7
TACC3	transforming_ acidic coiled-coil containing protein 3	-1.347	-0.429745	0.002904	0.038025	8.3665	1	8.94209	7.95023	8.6019	8.38287	8.93964	8.12283	8.05538	8.37996	8.11458	8.39938	8.32906	7.84341	8.61213	7.31289	8.4903	6.97467	8.28125	7.87905	8.77375	8.22657	9.05004	7.94433	8.70166	8.10635	8.52417	8.32065	8.53626	8.99373	8.2076	8.14164	10460	ERIC-1, ERIC1
ZFP64	ZFP64 zinc finger protein	-1.34677	-0.429501	3.99e-06	0.00025	7.4349	1	7.5122	7.11111	7.47679	7.39441	7.88005	6.66047	7.788	7.20466	7.64679	7.35242	7.70815	7.34709	7.85492	7.12571	8.0049	7.25151	7.26101	7.35922	8.00528	6.93555	7.50893	7.21639	7.60564	7.06853	7.46188	7.4738	7.07533	7.34673	7.50568	7.15175	55734	ZNF338
STAT1	signal transducer and activator of transcription 1_ 91kDa	-1.34647	-0.429183	0.004069	0.049116	9.7848	1	10.3619	10.2155	9.52728	10.1288	10.01	9.8496	10.2286	9.04635	9.66163	9.65675	9.96443	9.66461	10.198	10.0303	10.2009	9.73691	10.0746	9.18792	10.0442	9.39978	9.12615	9.24717	9.49279	8.97874	10.2438	9.32609	10.2859	8.57123	9.86403	9.15416	6772	CANDF7, IMD31A, IMD31B, IMD31C, ISGF-3, STAT91
ATP2B1	ATPase_ Ca++ transporting_ plasma membrane 1	-1.34558	-0.428223	0.000664	0.012277	8.2359	1	8.03597	8.5208	8.29085	8.03547	8.67376	8.72628	8.72418	8.00183	8.76797	8.348	8.71081	7.89497	8.64925	7.90457	8.62074	7.65764	8.4225	7.83604	8.64678	7.78368	7.96938	8.18563	8.19256	7.22147	8.33698	7.87288	8.06486	7.67262	8.12044	7.76969	490	PMCA1, PMCA1KB
PAICS	phosphoribosylaminoimidazole carboxylase_ phosphoribosylaminoimidazole succinocarboxamide synthetase	-1.34405	-0.426588	7.95e-05	0.002407	9.5517	1	10.3072	8.82831	9.99399	9.21105	9.88567	8.9997	9.70853	9.70852	9.52538	9.22817	9.61934	9.23524	9.6681	9.25939	9.50528	8.99486	9.29826	9.3419	9.16392	9.24802	9.94579	9.35861	9.8824	9.13937	9.97448	9.73595	9.54719	9.49041	9.8602	9.68736	10606	ADE2, ADE2H1, AIRC, PAIS
TMEM177	transmembrane protein 177	-1.34257	-0.425001	0.001665	0.024868	6.2186	2	6.80595	5.93048	6.81459	5.98165	6.9411	5.34193	6.29472	5.99065	6.25263	5.50131	6.51303	6.4654	6.23105	5.50262	6.3134	6.38491	6.05584	6.13234	5.6692	6.62858	6.44548	5.99201	6.30464	5.93182	6.43799	6.18309	6.28353	5.53284	6.71402	5.8889	80775	-
ADRBK2	adrenergic_ beta_ receptor kinase 2	-1.34174	-0.424109	0.000558	0.010697	6.0948	2	6.50289	5.69766	6.1787	5.84067	6.23451	5.98376	6.12422	6.37137	6.05454	5.9776	5.66087	6.01824	6.54651	5.57759	6.34858	5.00868	6.53031	5.56466	6.62357	6.09695	6.56811	5.94645	6.01555	5.52464	6.28423	5.96401	6.55517	6.49147	6.13591	5.59679	157	BARK2, GRK3
PAQR4	progestin and adipoQ receptor family member IV	-1.33634	-0.418282	0.002141	0.030074	7.3081	1	7.45077	7.30601	7.04587	7.0547	7.68901	7.01987	7.6102	7.3054	7.90863	7.51847	7.19217	6.41492	7.51751	6.703	7.36855	7.09573	8.06843	6.49508	7.72376	6.86471	7.84321	6.90326	6.78719	7.40304	7.42965	6.8537	7.47235	6.99077	6.9776	7.76315	124222	-
MCM4	minichromosome maintenance complex component 4	-1.33584	-0.417745	2.19e-05	0.000897	9.4694	1	10.0608	9.1104	10.1275	9.36975	9.66904	9.02323	9.48139	9.56418	9.39439	9.43003	9.44883	9.05329	9.23546	9.2575	9.47906	8.95808	9.41558	9.13744	9.39372	8.98629	9.94902	9.20588	9.90688	9.15529	9.83531	9.66738	9.36602	9.28688	9.84085	9.24617	4173	CDC21, CDC54, NKCD, NKGCD, P1-CDC21, HCDC21
GEN1	GEN1 Holliday junction 5' flap endonuclease	-1.33401	-0.415774	0.001569	0.024032	6.0079	2	6.32846	5.99358	6.15908	5.98165	5.72129	6.14687	6.57564	6.14361	5.82486	5.9434	6.18454	5.54169	5.80934	5.15638	6.4384	5.33807	6.28456	5.9015	6.35711	5.81075	6.63377	5.97698	6.01555	5.7256	6.43799	5.31836	6.40164	6.35557	5.76101	5.02665	348654	GEN
MTFP1	mitochondrial fission process 1	-1.33386	-0.415609	0.002394	0.032614	8.0242	1	8.2339	7.91806	8.34396	7.90497	8.86153	7.77474	7.704	7.41166	7.95749	7.52426	8.44724	7.84817	8.55067	8.11636	8.1973	8.47594	7.71788	8.0431	7.75789	7.73685	7.75006	7.75913	8.5919	7.7518	8.01725	7.79964	7.99679	6.8257	8.58313	7.52096	51537	HSPC242, MTP18
RRAS2	related RAS viral (r-ras) oncogene homolog 2	-1.33322	-0.414914	0.002972	0.038801	9.7929	1	10.1546	9.19785	10.4293	8.67456	9.85088	8.84458	9.60117	9.92768	10.0597	8.81807	10.1241	8.99863	9.63517	9.34594	9.52079	9.73381	9.9579	9.87551	9.66439	9.94508	9.89482	9.95343	10.1056	9.77486	10.2333	9.67342	9.88077	9.78043	10.3804	9.94895	22800	TC21
PTCD2	pentatricopeptide repeat domain 2	-1.33195	-0.413542	0.001121	0.018527	5.461	2	5.9387	4.86674	5.90008	5.48227	5.62696	5.37156	5.93083	5.40089	5.72577	4.70603	5.99723	5.49385	5.84391	5.22017	6.12334	5.46335	5.63701	5.56466	5.09835	5.02996	5.69511	5.657	5.23958	5.12001	5.51723	5.10607	5.31919	4.7046	5.10532	5.53668	79810	-
TIMM50	translocase of inner mitochondrial membrane 50 homolog (S. cerevisiae)	-1.33065	-0.412133	0.00042	0.008598	9.3742	1	9.49978	9.25262	9.71369	9.19873	10.1093	8.93419	9.33549	8.97678	9.89046	8.86223	10.1457	9.24431	9.92176	9.22093	9.67888	9.57628	9.58688	9.14275	9.30911	9.12156	8.9537	9.19456	9.01854	9.13296	9.39859	9.19279	8.88809	9.21605	9.34629	8.85519	92609	TIM50, TIM50L
RPP30	ribonuclease P/MRP 30kDa subunit	-1.32839	-0.409675	4.87e-05	0.001643	7.6138	1	7.96242	7.2468	8.16369	7.16864	7.93029	7.22046	7.17127	7.64997	7.6683	7.01634	8.16068	7.09788	7.85492	7.53608	7.88621	7.4538	7.88994	7.40114	7.36103	7.64683	7.86388	7.70544	7.88287	7.3977	7.73018	7.50123	7.33488	7.59023	7.96473	7.09036	10556	TSG15
TTF2	transcription termination factor_ RNA polymerase II	-1.32506	-0.406059	0.003625	0.045134	7.0325	1	7.40523	6.01402	7.22642	6.63415	6.69598	6.74214	7.55373	7.21851	6.91462	6.84163	7.10204	6.26621	7.26032	6.56241	7.1796	5.43304	7.22473	6.93085	7.44124	7.12325	7.19769	6.95018	7.22802	6.76264	7.43777	7.29099	7.4953	7.30306	6.90495	7.12138	8458	HUF2, ZGRF6
SCLT1	sodium channel and clathrin linker 1	-1.32216	-0.402897	4.35e-05	0.001513	6.1238	2	6.47671	5.88682	6.39545	5.96234	6.6367	6.02163	6.50789	5.80124	6.16457	5.67813	6.21925	6.10041	6.00532	6.10255	6.82728	6.19924	6.40619	5.66638	5.94792	5.85528	6.31146	6.09302	5.84591	5.9755	6.47004	5.56708	6.15488	6.00207	6.21016	5.9362	132320	CAP-1A, CAP1A
CTNS	cystinosin_ lysosomal cystine transporter	-1.31981	-0.400325	0.003939	0.04791	7.5465	1	7.5587	7.85149	7.34405	7.51863	7.89531	7.83978	8.04517	7.57662	8.14174	7.4409	7.48385	7.12953	8.10698	6.64607	7.9752	7.0059	8.0311	7.30348	8.22687	7.43824	6.85638	7.20354	7.3756	7.1597	7.64149	7.34043	7.5104	6.67397	7.17589	7.35685	1497	CTNS-LSB, PQLC4
KIF3A	kinesin family member 3A	-1.3191	-0.399554	0.000589	0.011154	6.5765	2	6.37645	5.99358	6.83946	6.29129	7.00813	6.27783	6.95575	6.93801	6.85021	6.73568	7.02566	6.64039	6.89861	5.90322	7.01416	6.50636	6.4191	6.48398	6.85742	6.00771	6.75675	6.05059	6.61303	5.91696	6.45411	6.70119	6.64002	6.68535	6.74765	5.8889	11127	FLA10, KLP-20
DNAJC9	DnaJ (Hsp40) homolog_ subfamily C_ member 9	-1.31615	-0.396328	5.52e-05	0.001793	8.2183	1	8.47336	7.89069	8.44464	8.39733	8.75963	8.14445	8.18497	8.15367	8.73777	8.27423	8.54626	7.94919	8.56628	8.04769	8.38692	7.85348	8.60296	8.08412	8.64418	7.65944	8.27737	8.07002	7.88835	7.62498	8.30624	7.82157	7.73916	8.01246	8.16468	7.96477	23234	HDJC9, JDD1, SB73
ITGB1BP1	integrin beta 1 binding protein 1	-1.31457	-0.394595	0.000398	0.008242	8.8736	1	8.90167	8.32617	9.12116	8.48792	9.40162	8.28344	8.99904	8.72608	9.2592	8.35778	9.64191	8.46556	9.28976	8.70934	9.34321	9.02312	9.14166	8.72385	9.02065	8.77848	8.77244	9.08321	8.51616	8.65752	8.71346	8.5162	8.45663	8.867	8.81889	8.66123	9270	ICAP-1A, ICAP-1B, ICAP-1ALPHA, ICAP1, ICAP1A, ICAP1B
SPRED1	sprouty-related_ EVH1 domain containing 1	-1.31401	-0.393977	0.001488	0.02311	6.6511	2	6.74876	5.86449	6.83946	6.51988	6.91139	6.58659	6.98451	6.11429	7.412	6.9746	7.00591	6.53796	7.09795	6.84127	6.64118	6.75943	6.94144	6.30629	6.83932	6.15747	6.44548	6.64264	7.0636	6.39555	6.75659	6.49833	6.38535	5.67666	6.21016	6.37424	161742	NFLS, PPP1R147, HSPRED1, SPRED-1
PPIH	peptidylprolyl isomerase H (cyclophilin H)	-1.31209	-0.391868	0.003998	0.048465	8.0922	1	8.48435	7.99717	8.71373	7.65722	8.34385	7.08393	7.77982	7.8366	7.95311	7.25119	8.74098	7.78993	8.50009	8.22529	8.38974	8.47965	8.0311	8.06562	7.74336	7.74476	8.03768	8.26818	8.35553	7.67882	8.52417	8.19861	7.61191	7.76671	8.44646	7.52096	10465	CYP-20, CYPH, SNUCYP-20, USA-CYP
CCT2	chaperonin containing TCP1_ subunit 2 (beta)	-1.31181	-0.391564	0.000168	0.004283	10.5168	1	10.8304	10.4953	11.0248	10.4696	11.0474	10.279	10.5147	10.0036	10.8931	10.3698	11.173	10.3802	10.9761	10.4869	10.9252	10.3434	10.5945	10.1995	10.3825	10.3677	10.0607	10.4234	10.3161	10.1596	10.4457	10.1488	10.1837	9.89026	10.6057	10.4226	10576	99D8.1, CCT-BETA, CCTB, HEL-S-100N, PRO1633, TCP-1-BETA
BSG	basigin (Ok blood group)	-1.31122	-0.390907	5.23e-05	0.001735	12.1484	1	12.1258	11.8878	12.1252	12.1402	12.7275	11.8573	12.0379	11.7884	12.6311	11.88	12.5603	11.9564	12.7717	11.7492	12.63	11.7629	12.3212	11.9056	12.6718	12.0778	11.9402	11.9806	11.9278	12.1393	12.0503	11.9117	11.9647	12.0761	11.9785	11.8701	682	5F7, CD147, EMMPRIN, M6, OK, TCSF
C11orf24	chromosome 11 open reading frame 24	-1.31106	-0.390735	0.000131	0.003502	7.4851	1	7.87492	7.08237	7.3784	7.25849	7.79584	7.59171	7.55373	7.5604	7.67893	7.44702	7.41814	6.99852	7.78547	6.74697	7.49953	6.6842	7.6701	7.0181	7.78652	7.3267	7.87071	7.13751	7.42162	7.43989	7.90449	7.32823	7.68695	7.92873	7.68126	7.16174	53838	DM4E3
PPT1	palmitoyl-protein thioesterase 1	-1.31067	-0.390306	0.001444	0.02257	8.5919	1	8.5486	8.6074	8.69682	8.54746	8.87185	8.47648	8.63173	8.29757	8.82414	8.30823	9.40992	8.17075	9.30379	8.36236	8.96856	8.23803	9.23217	8.49414	8.85032	8.71546	8.00703	8.4369	8.4658	8.37722	8.57295	8.38686	8.36405	7.70653	8.17089	8.39961	5538	CLN1, INCL, PPT
C12orf43	chromosome 12 open reading frame 43	-1.30862	-0.388049	4.35e-05	0.001513	6.8586	1	7.1309	6.4487	7.32657	6.7847	7.20054	6.39789	7.04722	6.66221	6.82171	6.05973	7.13877	6.61825	7.11928	6.65764	6.98465	7.01616	7.0366	6.85532	6.88416	6.66239	6.92355	6.82151	7.0636	6.61396	6.97335	6.88736	6.62622	6.99992	7.36109	6.02637	64897	-
EXOSC2	exosome component 2	-1.30832	-0.387713	0.001154	0.018895	7.714	1	8.12294	7.12996	8.41186	7.28205	7.68316	6.96261	7.56805	7.73431	7.53417	7.14983	7.93392	7.30612	7.73572	7.25316	7.93718	7.53454	7.59818	7.74131	7.32245	7.69663	7.73518	8.09111	8.10125	7.39234	8.17141	7.66057	8.12006	7.88003	8.15844	7.33054	23404	RRP4, RRP4P, HRRP4P, P7
RAD51C	RAD51 paralog C	-1.30415	-0.383107	0.001793	0.026336	5.5996	2	5.96405	4.86674	6.39545	5.61188	5.30014	5.70989	5.70745	5.56159	5.66288	5.65717	6.13085	5.19793	6.37982	5.73872	5.6649	5.43304	5.9172	5.20778	5.44812	5.28995	5.59976	5.74832	5.57437	5.22024	5.71743	5.39055	5.48126	5.31563	5.62288	5.11151	5889	BROVCA3, FANCO, R51H3, RAD51L2
SGCB	sarcoglycan_ beta (43kDa dystrophin-associated glycoprotein)	-1.30385	-0.38278	0.003904	0.047608	6.789	1	6.8943	5.86449	7.1086	6.29129	6.87081	5.88448	6.78637	7.07369	7.22148	6.69514	7.12052	5.94896	6.97078	6.16871	7.00684	6.44691	6.95035	6.64215	7.06641	7.23419	6.60131	6.93471	6.54536	6.87454	7.29298	6.27496	7.19233	6.51718	6.91977	7.0693	6443	A3B, LGMD2E, SGC
PPME1	protein phosphatase methylesterase 1	-1.30328	-0.382151	0.000166	0.004253	9.5314	1	9.77506	9.10565	9.39303	9.01642	9.68229	9.13975	9.70205	9.59502	10.1437	9.46963	9.67979	9.44319	10.1547	9.07546	9.71302	8.99746	9.63329	9.31865	9.99084	9.12004	9.81215	9.28274	9.7368	9.587	9.05993	9.51423	9.17783	9.39483	9.61352	9.61472	51400	PME-1
PMS1	PMS1 homolog 1_ mismatch repair system component	-1.30245	-0.381224	0.001361	0.021448	5.7709	2	5.87331	5.95182	6.05675	5.18181	5.76624	5.4006	6.42636	5.5397	5.45587	5.21626	5.95666	6.05167	5.82673	5.55303	6.12334	6.12532	5.9172	5.5	6.03003	5.60013	6.22888	5.38836	6.13085	5.40196	6.19116	5.04773	5.45027	5.65367	5.79358	5.86466	5378	HNPCC3, MLH2, PMSL1, HPMS1
FANCG	Fanconi anemia_ complementation group G	-1.29997	-0.378477	0.000175	0.004439	7.4001	1	7.79949	6.56406	7.63431	7.13453	7.65953	6.91309	7.29127	7.505	7.63592	7.23006	7.20088	6.81602	7.87595	7.10051	7.35708	7.14332	7.2894	7.30978	7.54541	7.24539	7.50893	7.43557	7.87738	6.89743	7.58407	7.63108	7.40929	7.2732	7.89141	7.47366	2189	FAG, XRCC9
CPT1A	carnitine palmitoyltransferase 1A (liver)	-1.29933	-0.377767	3.24e-05	0.001204	9.9145	1	10.2835	9.69844	10.2144	9.71091	9.72276	9.74594	10.3538	9.69373	10.0026	10.2296	10.3217	9.96907	10.1322	9.84547	10.4054	9.74619	9.95901	9.36175	9.97227	9.53138	9.87289	9.591	9.59003	9.38048	10.2611	9.69852	9.8047	9.65722	10.2175	9.60561	1374	CPT1, CPT1-L, L-CPT1
GLMN	glomulin_ FKBP associated protein	-1.29746	-0.37569	0.002029	0.028842	7.2036	1	7.07964	7.36288	7.59834	7.06379	7.39911	6.9331	7.14603	6.94636	7.56889	6.50888	7.97512	6.95502	7.49594	7.45223	7.5305	7.56282	7.56953	6.939	7.27609	7.21154	6.87006	7.29119	7.14815	6.52857	7.42965	6.68214	7.12524	6.69664	7.27146	6.42486	11146	FAP, FAP48, FAP68, FKBPAP, GLML, GVM, VMGLOM
PHB	prohibitin	-1.29636	-0.374466	0.001103	0.018308	11.0838	1	11.3508	10.8353	11.6149	10.9111	11.7771	10.5337	10.7206	10.849	11.2946	10.3859	11.6955	10.8119	11.417	10.9879	11.4369	11.2745	11.1226	10.9989	10.9569	11.0491	10.6806	11.164	11.1025	10.8941	11.2245	11.0289	10.6547	10.4706	11.2872	10.7374	5245	HEL-215, HEL-S-54E, PHB1
SIGMAR1	sigma non-opioid intracellular receptor 1	-1.29593	-0.37399	0.0002	0.004881	9.4757	1	9.76067	9.10565	9.48653	9.52922	9.63612	9.11806	9.9113	9.30829	9.96621	9.28903	9.78201	9.09197	9.91263	8.70377	9.84412	8.66714	9.66207	9.23338	9.71119	9.54956	9.46289	9.28731	9.07001	9.38723	9.55246	9.38618	9.423	9.4274	9.34354	9.69081	10280	ALS16, OPRS1, SIG-1R, SR-BP, SR-BP1, SRBP, HSIGMAR1, SIGMA1R
MAZ	MYC-associated zinc finger protein (purine-binding transcription factor)	-1.29386	-0.371679	0.000883	0.015386	10.6152	1	10.6223	10.3602	10.4727	10.6297	11.5851	10.4623	10.859	10.5707	10.9956	10.9282	10.7776	10.4159	11.0676	10.0633	11.0301	10.3934	10.7092	10.2544	10.9283	10.1907	10.4019	10.1778	10.5255	10.363	10.5241	10.4757	10.5231	10.1079	10.2806	10.5816	4150	PUR1, PUR-1, SAF-1, SAF-2, SAF-3, ZF87, ZNF801, ZIF87
CLPP	caseinolytic mitochondrial matrix peptidase proteolytic subunit	-1.29302	-0.370747	0.001722	0.025545	9.3656	1	9.83982	8.85404	9.89959	9.0939	10.0515	8.51017	9.04756	9.31313	9.52832	8.77253	9.61446	9.17963	9.62278	9.1754	9.4711	9.31259	8.82522	9.3419	9.01462	9.37068	9.37202	9.46474	9.59339	9.36003	9.52793	9.40518	9.21518	8.9753	9.93508	9.03159	8192	DFNB81, PRLTS3
ARMC6	armadillo repeat containing 6	-1.29273	-0.370419	0.000179	0.00448	8.4581	1	8.84652	8.03266	8.73708	8.3865	9.08644	8.01899	8.60419	8.56473	8.70172	8.31159	8.81093	8.37932	9.05358	8.19386	8.85897	8.23364	8.2199	8.1453	8.29819	8.24621	8.5651	8.33746	8.40219	8.12909	8.4894	8.44735	7.83225	8.3169	8.54059	8.09029	93436	R30923_1
PYCR2	pyrroline-5-carboxylate reductase family_ member 2	-1.28928	-0.366567	0.002476	0.033472	8.9998	1	9.1524	8.41337	8.99402	8.53117	9.70988	8.34448	9.37541	8.83569	9.12952	8.79668	9.27207	8.31539	9.43572	8.1495	9.29744	8.21594	8.9371	8.95851	9.09692	9.05631	9.19846	8.91405	8.92578	9.20506	9.02529	9.21284	8.90533	9.3128	8.93655	9.06654	29920	HLD10, P5CR2
MRPL4	mitochondrial ribosomal protein L4	-1.28916	-0.366426	0.000845	0.014904	10.3002	1	10.4614	9.82093	10.5725	9.97462	10.9875	9.50819	10.3295	10.3071	10.6587	9.93655	10.9314	10.381	10.7082	10.2874	10.6359	10.4831	10.2135	10.0531	10.2569	10.0613	10.0946	10.2223	10.213	10.0826	10.2633	10.377	9.84993	9.85163	10.4776	9.87654	51073	CGI-28, L4MT
ABI2	abl-interactor 2	-1.28724	-0.364278	0.003776	0.046378	7.1502	1	7.068	7.15778	6.77646	6.97983	7.28018	7.08393	7.92045	6.99543	7.8297	7.4409	7.57378	6.50214	7.57008	6.83109	7.54574	6.61837	7.18751	6.93085	7.79594	6.7593	6.87006	6.97308	7.04412	6.94946	6.89288	7.20017	7.10548	6.87624	6.71402	6.94763	10152	ABI-2, ABI2B, AIP-1, ABLBP3, SSH3BP2, ARGBP1, ARGBPIA, ARGBPIB
CLN6	ceroid-lipofuscinosis_ neuronal 6_ late infantile_ variant	-1.28556	-0.362397	0.002311	0.031835	8.2885	1	8.7146	8.06729	8.6728	8.04468	8.64095	7.83978	7.87508	8.40136	8.18714	7.83065	8.23889	7.93134	8.50819	7.25316	8.45845	7.2943	8.06022	8.35177	8.61521	8.35875	8.31288	8.23383	8.47674	8.43833	8.59854	8.14744	8.41711	8.25713	8.87702	8.37836	54982	CLN4A, HST18960, NCLF
ZSCAN22	zinc finger and SCAN domain containing 22	-1.28429	-0.360971	0.000902	0.015646	5.3361	2	5.51013	5.07559	5.58418	4.96602	5.52603	5.11548	5.54313	4.88012	5.43092	4.93218	5.52874	4.93678	5.1842	5.31086	5.58847	4.96696	5.26057	5.62655	5.76821	5.31142	5.66402	5.24521	4.97733	5.5049	5.60645	5.26815	5.57043	5.22494	6.13591	4.93649	342945	HKR2, ZNF50
SEPHS2	selenophosphate synthetase 2	-1.2829	-0.359409	0.003814	0.046728	8.9672	1	8.76053	8.3979	9.04837	8.78863	9.65566	8.31046	9.23132	8.50949	9.59862	8.70777	9.60136	8.91936	9.35413	8.92328	9.49485	9.25743	9.16483	8.78166	9.13267	8.94396	8.70149	8.92584	8.838	8.80604	8.64842	8.73764	8.31759	8.63719	8.78285	8.72658	22928	SPS2, SPS2B
SOCS5	suppressor of cytokine signaling 5	-1.28082	-0.357067	3.21e-05	0.0012	7.2255	1	7.19653	7.11111	7.47679	6.7847	7.34828	6.86181	7.82028	7.11128	7.58594	6.8135	7.44771	7.09788	7.57008	7.10896	7.64813	7.20741	7.11006	7.10037	7.57306	7.34243	6.92355	7.30329	7.29548	6.97837	7.18125	6.96822	7.29183	6.99992	7.2944	6.75005	9655	CIS6, CISH6, CISH5, SOCS-5
PTPMT1	protein tyrosine phosphatase_ mitochondrial 1	-1.28048	-0.356681	0.0003	0.0066	9.1304	1	9.23019	8.88765	9.47468	8.89687	9.55519	8.61299	9.09944	9.04052	9.34683	8.40567	9.91896	8.69972	9.39258	8.77453	9.41274	9.10952	9.37145	8.9685	9.0126	9.12156	9.21732	9.18968	8.98828	9.07223	9.1418	9.06442	8.70985	9.1943	9.27024	8.84283	114971	DUSP23, MOSP, PLIP, PNAS-129
NRAS	neuroblastoma RAS viral (v-ras) oncogene homolog	-1.27678	-0.352508	0.001122	0.018535	9.1434	1	8.99991	9.03741	9.171	8.63241	9.63309	9.09382	9.91784	9.1903	9.78243	9.06276	9.37763	8.82343	9.27241	9.3725	9.22671	9.31674	9.4252	8.87598	9.17479	8.71143	9.07979	9.05665	9.08439	8.57475	9.08083	8.96547	9.002	8.48592	9.03175	8.82095	4893	ALPS4, CMNS, N-RAS, NCMS, NRAS1, NS6
TP63	tumor protein p63	-1.27612	-0.351764	0.002557	0.034309	10.0229	1	9.87616	9.91901	9.80963	9.93554	10.3019	10.0265	10.6335	9.65352	10.4417	10.2887	10.4822	10.1264	10.3966	10.1019	10.4089	10.1624	10.3393	9.40212	10.4887	9.5176	9.77807	9.54335	9.74738	9.58348	10.104	9.53428	9.87348	9.73733	9.67161	9.59459	8626	AIS, B(P51A), B(P51B), EEC3, KET, LMS, NBP, OFC8, RHS, SHFM4, TP53CP, TP53L, TP73L, P40, P51, P53CP, P63, P73H, P73L
NOP56	NOP56 ribonucleoprotein	-1.27544	-0.350997	0.00024	0.005569	9.185	1	9.45131	9.24183	9.08262	9.14834	9.52281	9.43114	9.32989	8.97066	9.24853	9.311	9.5664	9.23342	9.60651	8.96809	9.53103	8.86747	9.22668	8.48024	9.4365	8.84255	9.06796	8.67197	8.78324	8.67087	9.57658	8.85073	9.19195	8.9753	9.42114	9.00688	10528	NOL5A, SCA36
CDC34	cell division cycle 34	-1.27535	-0.350889	0.000645	0.012006	10.1347	1	10.2224	9.85106	10.0968	9.52264	10.8481	9.663	9.87623	10.32	10.3474	9.82237	10.2874	9.97125	10.3011	9.96083	10.0682	10.2552	10.0675	9.86271	10.1202	9.59075	10.7442	9.91058	10.1777	9.97552	9.97448	10.1235	10.179	10.0252	10.7834	10.1071	997	E2-CDC34, UBC3, UBCH3, UBE2R1
EBNA1BP2	EBNA1 binding protein 2	-1.27325	-0.348511	0.000422	0.00862	9.7702	1	10.097	9.46233	10.2108	9.38071	10.4962	9.346	9.83239	9.76267	10.0069	9.41763	10.2522	9.69535	10.0905	9.59182	10.0549	9.70238	9.68094	9.59246	9.49982	9.71475	9.46289	9.88163	9.72767	9.63886	9.76922	9.71969	9.423	9.21605	9.98175	9.4915	10969	EBP2, NOBP, P40
NTMT1	N-terminal Xaa-Pro-Lys N-methyltransferase 1	-1.27119	-0.34618	0.001701	0.025294	7.1395	1	7.32436	6.68369	7.61284	6.91097	7.9104	6.50872	7.03352	7.01143	7.29936	6.67443	7.60035	7.05731	7.6698	6.94874	7.31026	7.13392	6.91435	6.88938	7.05861	7.11717	6.72697	7.10332	7.08283	7.27489	7.3371	7.11039	6.7586	6.87624	7.49582	6.95913	28989	AD-003, C9ORF32, HOMT1A, METTL11A, NRMT, NTM1A
BFAR	bifunctional apoptosis regulator	-1.27083	-0.345769	7.83e-05	0.002374	8.1261	1	8.20229	7.59084	8.42012	8.2094	8.35492	7.71242	8.29529	7.51063	8.42366	7.80707	8.56662	8.00572	8.51357	7.95699	8.26945	8.40352	8.36031	7.97336	8.34705	7.99743	7.88426	8.06292	8.37125	8.15781	8.02806	7.78632	7.99679	7.61425	8.20155	8.12132	51283	BAR, RNF47
NR2C2AP	nuclear receptor 2C2-associated protein	-1.26963	-0.344409	0.001438	0.022491	7.0125	1	7.33411	6.55014	7.5689	7.04555	7.24885	6.05854	6.43681	6.76956	7.24314	6.82294	7.4767	6.98993	7.28569	6.58681	7.03591	6.74716	6.84911	7.08576	6.86639	6.92862	7.01263	6.82151	7.34409	6.72901	7.29298	7.23979	7.3092	7.07107	7.15097	6.75005	126382	TRA16
ADO	2-aminoethanethiol (cysteamine) dioxygenase	-1.26845	-0.343067	0.000728	0.013187	7.8564	1	8.08878	7.14856	7.80816	7.75026	8.34385	7.18752	8.09549	7.91946	8.30167	8.15972	8.06374	7.70319	8.13517	7.43889	8.29973	7.3842	8.0928	7.56815	8.03739	7.59526	7.71257	7.79812	7.84959	7.65663	7.92198	7.75019	7.57647	7.57807	7.79016	8.14667	84890	C10ORF22
GART	phosphoribosylglycinamide formyltransferase_ phosphoribosylglycinamide synthetase_ phosphoribosylaminoimidazole synthetase	-1.26792	-0.342464	0.000284	0.006329	9.2257	1	9.80342	8.76943	9.76652	8.88922	9.15142	8.84722	9.26249	9.25386	9.04983	8.8086	9.5009	8.81858	9.38233	9.23837	9.36772	9.05333	9.20636	8.93832	9.11208	9.27011	8.84701	9.24874	9.36711	9.00708	9.6744	9.24403	9.40493	8.77143	9.60666	9.3014	2618	AIRS, GARS, GARTF, PAIS, PGFT, PRGS
PSMC3	proteasome 26S subunit_ ATPase 3	-1.26655	-0.340906	0.002103	0.029664	10.9203	1	11.1481	10.4198	11.268	10.7057	11.6999	10.2945	10.7674	10.8518	11.2472	10.4174	11.4064	10.7534	11.3759	10.6074	11.2078	10.8637	10.704	10.9213	10.8066	10.8434	10.663	11.1095	11.0102	10.9348	10.9211	10.9268	10.3978	10.4902	11.0701	10.6638	5702	TBP1
SNRPA1	small nuclear ribonucleoprotein polypeptide A'	-1.26599	-0.340262	0.003875	0.047354	8.9605	1	9.47464	8.50284	9.71537	8.57316	9.36373	8.47307	8.62032	8.94798	8.85728	8.18189	9.21731	8.544	8.88952	8.94232	8.83642	9.03326	8.8869	8.89287	8.61787	8.85174	9.38876	9.10928	9.38077	8.48441	9.21691	8.88237	8.75493	9.17827	9.12106	8.71984	6627	LEA1
RMND1	required for meiotic nuclear division 1 homolog	-1.26049	-0.33399	0.001482	0.02303	6.7902	1	6.98376	6.60505	6.95776	6.90086	6.93127	6.24619	6.87354	6.49027	7.24314	6.18213	7.433	6.54971	7.09078	6.85138	6.98465	7.09573	7.05325	6.71992	6.7836	6.79784	7.04918	6.68023	6.77542	6.76264	6.74353	6.57262	6.38535	5.88847	6.84407	6.62574	55005	C6ORF96, COXPD11, RMD1, BA351K16, BA351K16.3
HSPH1	heat shock 105kDa/110kDa protein 1	-1.25723	-0.330247	0.003442	0.043415	9.6446	1	10.2797	9.11277	9.46272	9.10055	9.89329	9.26147	10.3104	9.99459	9.71039	9.37656	9.6657	9.43846	9.70735	9.16328	9.90052	9.00004	9.58258	9.2515	9.68735	9.53595	9.42398	9.3873	9.62651	9.38858	9.97029	10.0296	9.64964	9.72498	9.85056	9.76308	10808	HSP105, HSP105A, HSP105B, NY-CO-25
PWP1	PWP1 homolog_ endonuclein	-1.25327	-0.325697	3.13e-05	0.001173	8.7255	1	9.19717	8.28051	9.1388	8.57316	8.81148	8.31809	8.83299	8.79469	8.8782	8.31494	8.91781	8.55861	8.94032	8.60568	8.84876	8.59367	8.65024	8.67587	8.59916	8.6684	8.73553	8.69281	8.91777	8.67308	8.98149	8.6324	8.44881	8.13376	9.15278	8.64708	11137	IEF-SSP-9502
YBX1	Y box binding protein 1	-1.25251	-0.324827	0.00028	0.006294	12.2356	1	12.2693	11.8933	12.371	12.0832	12.9462	11.9424	12.4111	12.0023	12.6261	12.1217	12.5465	12.0849	12.5666	12.0796	12.5695	12.0711	12.3363	11.8709	12.2162	11.9282	12.3415	11.9538	12.0824	11.7979	12.1771	12.0747	12.0099	12.2127	12.0714	12.6271	4904	BP-8, CSDA2, CSDB, DBPB, MDR-NF1, NSEP-1, NSEP1, YB-1, YB1
ACTL6A	actin-like 6A	-1.25209	-0.324334	7.4e-05	0.00227	8.6487	1	8.73683	8.05748	9.19769	8.4572	8.70872	8.06052	8.83101	8.48965	8.89881	8.43367	9.0442	8.37272	8.85392	8.82925	8.87715	8.74325	8.72488	8.54577	8.56377	8.6068	8.52673	8.62455	8.64783	8.40943	9.03604	8.3268	8.54729	8.36016	8.70796	8.65417	86	ACTL6, ARPN-BETA, ARP4, BAF53A, INO80K
ARMC10	armadillo repeat containing 10	-1.24694	-0.31839	0.001343	0.021245	9.138	1	9.27011	8.7634	9.60004	8.8398	9.41049	8.78527	9.25217	9.0541	9.51799	8.49989	9.83192	8.65963	9.2042	8.93521	9.39321	9.27889	9.22851	9.04792	8.81833	9.09241	8.76147	9.24404	8.98828	9.06719	9.30173	9.06993	9.14434	8.70587	9.28749	9.25319	83787	PNAS-112, PNAS112, PSEC0198, SVH
FN3KRP	fructosamine 3 kinase related protein	-1.24223	-0.31293	0.000722	0.013157	8.2248	1	8.12012	7.67023	8.02964	8.06746	8.80072	7.66534	8.36806	8.15727	8.67806	8.18556	8.63249	7.9712	8.5428	7.88502	8.54187	8.18444	8.4416	7.94935	8.53312	8.05265	8.28761	8.01223	8.24896	8.32753	7.86887	8.30206	8.04944	8.14204	8.17708	8.20093	79672	FN3KL
GMPS	guanine monophosphate synthase	-1.24209	-0.312768	0.003199	0.041069	8.5265	1	8.63595	8.27205	8.50418	8.44333	9.09527	8.29121	8.83694	8.52629	8.98275	8.3867	8.99747	8.52627	9.00094	8.5997	8.78384	8.55549	8.45419	8.25713	8.53594	8.12111	8.31788	8.50395	8.42119	7.98694	8.14683	8.5586	8.10023	7.80374	8.8846	8.3869	8833	-
UBA2	ubiquitin-like modifier activating enzyme 2	-1.24093	-0.311417	0.000993	0.016904	9.6507	1	9.95807	9.1708	10.1832	9.20696	9.60553	9.18843	9.80745	9.54645	9.78735	9.29921	9.93341	9.31656	9.74328	9.71455	9.7119	9.78422	9.63606	9.73156	9.31239	9.5473	9.31061	9.86642	9.88788	9.38588	9.99803	9.45654	9.79086	9.14362	10.0675	9.64884	10054	ARX, HRIHFB2115, SAE2
H2AFV	H2A histone family_ member V	-1.23296	-0.302126	0.00022	0.005217	9.2418	1	9.3139	8.77542	9.41181	9.09612	9.81657	8.64671	9.41821	9.15294	9.47134	8.94668	9.57815	8.88731	9.40131	9.21703	9.602	9.18878	9.15714	9.23503	9.16573	9.0893	9.51609	9.14333	9.34141	9.06213	9.22163	9.27296	8.89386	9.38614	9.28176	8.97892	94239	H2A.Z-2, H2AV
SMG9	SMG9 nonsense mediated mRNA decay factor	-1.23238	-0.301451	0.002501	0.033706	7.2667	1	7.40523	6.49305	7.49256	7.43702	7.17576	7.22046	6.99869	7.42963	7.34013	7.35242	7.433	6.85442	7.60073	6.43379	7.68987	7.07624	7.52248	6.77562	7.63734	7.26202	7.51765	7.11022	7.55148	7.166	7.31079	7.272	7.26536	7.33954	7.17589	7.0693	56006	C19ORF61, F17127_1
PGAM5	PGAM family member 5_ serine/threonine protein phosphatase_ mitochondrial	-1.23206	-0.301068	0.002308	0.03182	9.2536	1	9.54667	8.74518	9.35257	9.03503	9.75657	9.06009	9.55517	9.01298	9.54731	9.34415	9.6829	9.26583	9.60903	9.38994	9.55633	9.45517	9.45683	8.94845	9.03862	8.87895	8.88458	8.95871	8.8152	8.96616	9.36276	9.04218	8.98858	8.8494	9.42893	9.27175	192111	BXLBV68
RELB	v-rel avian reticuloendotheliosis viral oncogene homolog B	-1.23167	-0.300619	0.001326	0.021033	8.4119	1	8.66908	8.30559	8.49247	8.54097	8.7762	8.25986	7.93894	8.18221	8.51552	8.72549	8.17843	7.96682	8.47273	8.20573	8.30571	8.27695	8.61702	8.10962	8.67002	7.94346	8.68996	7.89722	8.65747	8.55088	8.59128	8.23828	8.81395	7.98969	8.75004	8.36546	5971	I-REL, IREL, REL-B
POLR2D	polymerase (RNA) II (DNA directed) polypeptide D	-1.23116	-0.300015	0.003982	0.048334	7.5722	1	7.94024	7.28093	7.79551	7.24256	7.66547	6.96261	7.72546	7.37505	7.76629	7.42239	8.20032	7.57685	8.09627	7.70723	8.01953	7.94763	7.69684	7.30978	7.45913	7.37338	7.51765	7.70544	7.47352	7.39234	7.21946	7.34043	7.44116	7.29565	7.42484	7.09036	5433	HSRBP4, HSRPB4, RBP4, RPB16
CSE1L	CSE1 chromosome segregation 1-like (yeast)	-1.22747	-0.295691	0.000904	0.015658	9.5331	1	10.0077	9.20008	10.0187	9.44822	9.68814	9.36638	9.65249	9.55875	9.54003	9.31267	10.1264	9.42098	9.83205	9.53964	9.7606	9.35565	9.40264	9.31865	9.35443	9.33836	9.41467	9.36728	9.47289	9.09055	9.72009	9.57487	9.02058	9.17827	9.72745	9.5092	1434	CAS, CSE1, XPO2
EXOSC3	exosome component 3	-1.22647	-0.294515	5.38e-05	0.001763	7.537	1	7.87158	7.22943	7.91732	7.25055	7.83856	7.25267	7.41267	7.42367	7.50458	7.14983	7.82544	7.64414	7.74031	7.6848	7.74812	7.46882	7.42989	7.30978	7.44722	7.23419	7.71257	7.44105	7.80977	7.2395	7.70347	7.46268	7.38491	7.55343	7.76575	7.36552	51010	CGI-102, PCH1B, RRP40, RRP40P, BA3J10.7, HRRP-40, P10
IFI16	interferon_ gamma-inducible protein 16	-1.22523	-0.29305	0.002348	0.032177	9.7178	1	10.1771	9.23096	9.88473	10.008	9.7896	9.31393	9.43003	9.64073	9.32838	9.40512	9.69528	9.51236	9.888	9.79531	9.67888	9.5465	9.5404	9.59891	9.58513	9.5199	9.98563	9.4444	9.92029	9.471	10.1967	9.59792	10.126	9.76442	10.2748	9.40589	3428	IFNGIP1, PYHIN2
ARHGDIA	Rho GDP dissociation inhibitor (GDI) alpha	-1.22455	-0.292255	0.000854	0.01501	11.5409	1	11.8129	11.3873	11.3357	11.2381	12.0788	11.398	11.8868	11.7493	11.8787	11.5198	11.5056	11.3927	12.0076	11.1654	11.7357	11.104	11.4244	11.2599	11.8025	11.2153	11.7805	11.2745	11.4203	11.386	11.4161	11.7005	11.2402	11.4594	11.5663	11.3837	396	GDIA1, HEL-S-47E, NPHS8, RHOGDI, RHOGDI-1
SMYD2	SET and MYND domain containing 2	-1.22311	-0.290554	0.000568	0.010875	8.2956	1	8.64186	7.78764	8.7568	7.8999	8.36956	7.74674	8.22771	8.46081	8.3623	7.82597	8.60322	7.84817	8.47825	7.97097	8.32938	8.22923	8.40963	8.15583	8.40667	8.52187	8.29777	8.38377	8.45846	8.29629	8.36282	8.23501	8.2562	8.11704	8.52613	8.37836	56950	HSKM-B, KMT3C, ZMYND14
GNPAT	glyceronephosphate O-acyltransferase	-1.22099	-0.288057	0.00059	0.011154	8.2706	1	8.36098	7.68942	8.59826	8.23377	8.5856	7.70079	8.3405	8.05295	8.60187	7.79273	8.81944	8.19339	8.55067	8.17387	8.45307	8.22038	8.18255	8.20399	8.09575	8.32748	8.19276	8.27434	8.14763	8.36633	8.24272	8.12997	8.33466	7.99884	8.48186	8.25789	8443	DAP-AT, DAPAT, DHAPAT
APTX	aprataxin	-1.22075	-0.287773	0.00369	0.045718	8.4291	1	8.46006	7.95023	8.54255	8.06746	9.02303	8.0741	8.72205	8.37379	8.57366	7.95175	9.06104	8.2911	8.67107	8.56327	8.86505	8.39568	8.2883	8.26363	8.31466	8.36389	7.93723	8.35791	8.28259	8.21055	8.53557	8.39273	8.37234	8.62837	8.48186	8.13151	54840	AOA, AOA1, AXA1, EAOH, EOAHA, FHA-HIT
RBMX	RNA binding motif protein_ X-linked	-1.21854	-0.285157	0.003847	0.047066	9.7528	1	9.98773	8.9579	10.1007	9.36056	10.0182	8.983	9.88102	9.96512	9.66163	9.39724	9.91632	9.29927	9.8005	9.35662	9.93372	9.44001	9.75532	9.81588	9.53117	9.91033	9.91806	9.92043	10.0046	9.67904	9.9548	9.71853	9.79086	9.90494	10.0132	9.8035	27316	HNRNPG, HNRPG, RBMXP1, RBMXRT, RNMX, HNRNP-G
UCHL3	ubiquitin carboxyl-terminal esterase L3 (ubiquitin thiolesterase)	-1.21357	-0.279254	0.00412	0.049595	8.6462	1	8.7785	8.40565	8.83925	8.31215	9.19111	8.0786	8.64531	8.53461	8.99344	7.94312	9.00991	8.79656	8.79551	8.70656	8.9148	8.9285	8.7608	8.33951	8.47275	8.6068	8.6861	8.72465	8.50551	8.29629	8.63434	8.53755	8.27842	8.59858	8.97964	8.38264	7347	UCH-L3
THOC3	THO complex 3	-1.21174	-0.277076	0.001143	0.018763	8.412	1	8.83626	7.95552	8.70361	8.46065	8.68258	8.03297	8.57847	8.26792	8.6965	8.28793	8.72597	8.0926	8.94032	8.31931	8.60385	8.37589	8.43208	8.376	8.35025	8.41189	8.19276	8.36658	8.37125	8.35259	8.21462	8.43602	8.02335	7.97585	8.55965	8.21538	84321	THO3, HTREX45
CIRH1A	cirrhosis_ autosomal recessive 1A (cirhin)	-1.2115	-0.276795	0.000882	0.015386	8.3325	1	8.84481	7.97128	8.53496	8.2094	8.23213	8.17838	8.59722	7.98977	8.47338	8.15225	8.75879	8.12044	8.55589	7.92385	8.2786	8.11452	8.30577	8.44918	8.02943	8.25177	8.41445	8.17579	8.2232	8.04958	8.57663	8.38097	8.46828	8.03933	8.52128	8.66825	84916	CIRHIN, NAIC, TEX292, UTP4
ELOF1	ELF1 homolog_ elongation factor 1	-1.21119	-0.27643	0.002975	0.038801	8.9165	1	9.02722	8.49196	8.98847	8.44333	9.55198	8.41377	8.79085	8.9542	9.09023	8.49104	9.25544	8.88035	9.15342	8.89424	9.17211	8.89275	8.55115	8.70962	8.81833	8.73942	9.12044	8.95297	9.01103	8.76307	9.104	9.06809	8.63947	9.06736	9.20818	8.58538	84337	ELF1
TIMM21	translocase of inner mitochondrial membrane 21 homolog (yeast)	-1.21048	-0.275578	0.001323	0.020996	7.6055	1	7.91771	7.31427	7.99685	7.83766	8.11539	7.15381	7.66009	7.58733	7.75629	7.45917	7.74435	7.84817	7.77207	7.59742	7.90996	7.67069	7.65927	7.09308	7.60556	7.46243	7.36168	7.45196	7.55836	7.13424	7.72355	7.4738	7.57647	7.38214	7.60992	7.31273	29090	C18ORF55, HSPC154, TIM21
HN1L	hematological and neurological expressed 1-like	-1.2072	-0.271667	0.002069	0.029322	10.288	1	10.4018	9.76627	10.1097	10.2292	10.663	9.93395	10.6538	10.1133	10.6893	10.2664	10.6434	10.1234	10.6373	10.4164	10.6629	10.1932	10.5643	10.0437	10.3129	10.1027	10.0989	10.0792	10.1277	10.0967	10.0413	10.3733	10.1	9.8453	10.2691	10.4278	90861	C16ORF34, L11
HNRNPDL	heterogeneous nuclear ribonucleoprotein D-like	-1.2004	-0.263511	0.002394	0.032614	10.4296	1	10.3978	10.2959	10.4537	9.9914	10.5851	10.1244	10.5656	10.2752	10.4703	10.3006	10.273	9.95588	10.3296	9.96083	10.3963	9.94593	10.4691	10.265	10.595	10.418	10.7507	10.543	10.5282	10.4378	10.7416	10.3613	10.9804	10.8471	10.6608	10.3371	9987	HNRNP, HNRPDL, JKTBP, JKTBP2, LGMD1G, LAAUF1
TEX10	testis expressed 10	-1.19616	-0.258415	0.002456	0.033248	7.7027	1	8.09453	7.12057	7.70368	7.13453	7.828	7.11053	7.94261	7.76765	7.86273	7.51847	7.85885	7.682	7.80315	7.66774	7.82091	7.69644	7.6647	7.56288	7.44722	7.77212	7.67407	7.51573	7.87187	7.69633	8.14683	7.81284	7.6049	7.47689	8.02082	7.78268	54881	IPI1, BA208F1.2
MEAF6	MYST/Esa1-associated factor 6	-1.19354	-0.25525	0.002256	0.031314	9.0589	1	8.88186	8.54909	8.94616	8.67753	9.42458	8.82864	9.22982	8.94174	9.42314	8.65326	9.56809	9.05535	9.37348	9.05811	9.26404	9.17739	9.08611	8.97446	8.99635	8.87895	9.34777	9.03324	8.838	8.88832	8.94204	8.95162	8.89098	9.1843	9.27889	8.89762	64769	C1ORF149, CENP-28, EAF6, NY-SAR-91
KHDRBS1	KH domain containing_ RNA binding_ signal transduction associated 1	-1.18452	-0.244307	0.000926	0.01592	10.014	1	10.3257	9.52775	10.3428	9.81284	10.3433	9.58925	10.1055	10.1197	9.95094	9.84686	10.1377	9.76628	9.89625	9.65377	10.0496	9.74773	9.96672	10.0199	9.88341	9.89085	10.317	10.02	10.2592	9.88584	10.0103	10.1119	9.93074	10.0397	10.3258	10.0942	10657	SAM68, P62, P68
GTF2E2	general transcription factor IIE_ polypeptide 2_ beta 34kDa	-1.18391	-0.243562	0.001939	0.02783	9.2808	1	9.52235	9.0299	9.57063	9.06477	9.78552	8.83663	9.38218	9.13662	9.08224	8.77253	9.54433	9.13354	9.50891	9.40717	9.44966	9.44761	9.32935	9.16898	8.97371	9.28511	9.41467	9.26584	9.30708	9.20659	9.26109	9.32455	9.17783	9.05205	9.49477	9.02066	2961	FE, TF2E2, TFIIE-B
USP10	ubiquitin specific peptidase 10	-1.16388	-0.218945	0.001603	0.024367	8.9878	1	9.23671	8.7814	9.12116	8.80769	9.17035	8.58164	9.53586	8.8821	9.17155	9.02032	8.95691	8.9705	9.02373	9.07762	9.03306	8.82724	8.90993	8.60846	8.96747	8.64534	8.89131	8.94334	8.89076	8.84188	9.12428	9.08451	9.02321	8.87696	9.23214	9.07713	9100	UBPO
UPREGULATED
GPBP1L1	GC-rich promoter binding protein 1-like 1	1.14266	0.192401	0.001244	0.019952	9.5557	1	9.48344	9.66006	9.31981	9.6183	9.30211	9.7087	9.7882	9.43079	9.69476	9.88228	9.31081	9.65513	9.46932	9.8829	9.43337	9.78871	9.49998	9.58599	9.36237	9.44783	9.3672	9.63713	9.36907	9.52221	9.37551	9.48567	9.59933	9.62359	9.37077	9.75156	60313	SP192
IST1	increased sodium tolerance 1 homolog (yeast)	1.15585	0.208951	0.000113	0.003141	10.027	1	9.93823	9.96958	9.72208	9.88	9.82721	9.96951	9.93083	10.1864	9.85924	10.0881	9.86107	10.2762	9.91161	10.4215	9.87461	10.1761	9.78179	10.0531	9.86339	10.0864	10.1249	10.142	10.0651	10.1139	9.77244	10.2091	10.0466	10.2129	10.1468	10.0585	9798	OLC1
PRKCI	protein kinase C_ iota	1.16256	0.217309	0.002291	0.031651	9.1996	1	9.10476	9.45488	9.05899	9.21514	8.74286	9.49647	9.40231	9.1655	9.07219	9.31435	9.16485	9.24069	8.77774	9.47738	9.00209	9.55533	9.19702	9.21838	8.76658	9.17231	9.11757	9.28274	9.1428	9.12004	9.14676	9.26338	9.12729	8.9983	9.3325	9.50136	5584	DXS1179E, PKCI, NPKC-IOTA
BRD7	bromodomain containing 7	1.16723	0.223095	0.000331	0.007112	9.0125	1	9.0377	9.20231	8.77946	9.13976	9.18077	9.27329	9.08125	9.0209	8.82653	9.30596	8.8391	9.25511	8.89571	9.25559	8.94385	9.23124	8.77341	8.91577	8.56652	9.03872	9.00732	9.14669	8.92844	8.84777	8.81053	9.14315	8.68344	8.96833	9.00071	9.00688	29117	BP75, CELTIX1, NAG4
ZNF24	zinc finger protein 24	1.1675	0.223427	0.003558	0.044441	8.5776	1	8.59192	8.74212	8.1735	8.67159	8.27941	8.79076	8.85263	8.85354	8.46725	8.56883	8.46904	8.70498	8.14213	9.06247	8.34688	8.75555	8.54822	8.52967	8.38811	8.6262	8.72804	8.51699	8.23614	8.4743	8.44575	8.74225	8.78319	8.57429	8.27257	8.61837	7572	KOX17, RSG-A, ZNF191, ZSCAN3, ZFP191
CTSA	cathepsin A	1.16858	0.224752	0.003469	0.043668	10.1374	1	10.0371	10.3074	9.69167	10.3474	9.84565	10.0925	10.023	10.2306	10.009	10.0353	9.84588	10.2258	10.2096	9.94557	10.0987	9.8488	10.0572	10.3644	10.0303	10.5172	9.75797	10.3734	10.0468	10.6237	9.99528	10.3234	10.3088	9.97038	10.2235	10.2752	5476	GLB2, GSL, NGBE, PPCA, PPGB
ADNP	activity-dependent neuroprotector homeobox	1.17671	0.23476	0.000219	0.005197	9.0391	1	8.94845	9.26333	8.98569	9.34945	8.39483	9.25552	9.17627	9.02682	8.73267	9.17389	8.92045	9.11784	8.75066	9.21115	8.86303	9.18196	9.03254	8.9685	8.99431	9.07368	8.85046	9.00203	8.8152	9.02624	9.00902	9.08451	9.14434	9.20818	8.99372	9.31712	23394	ADNP1, HVDAS, MRD28
NFKBIB	nuclear factor of kappa light polypeptide gene enhancer in B-cells inhibitor_ beta	1.17814	0.236506	0.003808	0.046676	8.8037	1	8.86345	9.12221	8.80809	9.12464	9.03226	9.23148	8.34328	8.92706	8.24196	9.02441	8.51517	9.07174	8.72075	8.77983	8.58431	8.91759	8.45105	8.85459	8.62845	8.67256	8.94726	8.73138	8.95476	8.68409	8.60578	8.89483	8.62566	8.96366	8.67775	8.65063	4793	IKBB, TRIP9
CCDC47	coiled-coil domain containing 47	1.17986	0.238615	0.003924	0.047811	9.7358	1	9.87031	9.79755	9.60186	10.2078	9.19522	10.1211	9.53464	9.94027	9.58878	10.0514	9.37763	9.88695	9.47622	9.81222	9.68462	9.55533	9.59969	9.72804	9.7828	9.80075	9.48084	9.72519	9.9243	9.74992	9.5729	9.8513	9.77218	9.26239	9.54584	10.0465	57003	GK001, MSTP041
COPA	coatomer protein complex_ subunit alpha	1.18374	0.24335	0.000649	0.012046	10.2571	1	10.3601	10.2514	9.99122	10.3959	9.75378	10.4458	10.4178	10.1908	10.0729	10.5554	10.0597	10.5535	10.2705	10.4616	10.0576	10.302	9.94234	10.1651	10.1117	10.1541	10.3673	10.0669	10.2634	10.4378	9.89408	10.4764	10.0749	10.4041	10.1468	10.6363	1314	AILJK, HEP-COP
IK	IK cytokine_ down-regulator of HLA II	1.18749	0.247911	0.003607	0.045007	9.5436	1	9.4889	9.81366	9.25428	9.65034	9.70844	9.93395	9.34523	9.46168	9.2645	9.85264	9.40804	10.0015	9.5116	9.95146	9.56882	9.76305	9.18385	9.5073	9.3687	9.53823	9.73197	9.44167	9.45087	9.3614	9.1418	9.63555	8.98318	9.46751	9.60208	9.35459	3550	CSA2, RED
SNX1	sorting nexin 1	1.18893	0.249665	0.00024	0.005569	9.7429	1	9.58086	9.74656	9.35473	10.0463	9.98409	9.77949	9.81147	9.72559	9.66832	9.82941	9.70297	9.95809	9.73063	9.99542	9.73646	9.83582	9.422	9.80142	9.26232	9.90151	9.35265	9.75081	9.47107	9.95838	9.6183	9.91897	9.85881	9.67874	9.42634	9.98453	6642	HST17379, VPS5
SOCS6	suppressor of cytokine signaling 6	1.18901	0.249765	0.002132	0.029968	8.3994	1	8.2129	8.6986	8.33086	8.45375	8.14972	8.64974	8.76414	8.32022	8.23116	8.58556	8.36049	8.67312	7.83787	8.88689	8.20052	8.80964	8.29881	8.376	8.20229	8.56719	8.20901	8.49078	8.31952	8.21966	8.19557	8.25126	8.15411	8.34588	8.43102	8.32605	9306	CIS-4, CIS4, HSPC060, SOCS-4, SOCS-6, SOCS4, SSI4, STAI4, STATI4
AP3B1	adaptor-related protein complex 3_ beta 1 subunit	1.19084	0.251979	0.003045	0.039456	8.7071	1	8.78917	8.58709	8.54633	9.01876	8.6349	8.84193	9.02869	8.91222	8.65401	8.87363	8.6228	9.08794	8.60206	9.11165	8.5444	8.53422	8.15196	8.6059	8.30809	8.70536	8.69381	8.563	8.59525	8.88068	8.52417	8.98504	8.21069	8.53393	8.52613	9.02886	8546	ADTB3, ADTB3A, HPS, HPS2, PE
TSPAN14	tetraspanin 14	1.19346	0.255155	0.000234	0.00548	10.595	1	10.5267	10.8574	10.0309	10.966	10.2544	10.8852	10.5379	10.7404	10.5295	10.8559	10.3177	10.633	10.5776	10.6715	10.618	10.3726	10.6065	10.6854	10.7301	10.7861	10.3418	10.6284	10.3855	10.6627	10.3061	10.7455	10.6436	10.3868	10.3548	10.7753	81619	DC-TM4F2, TM4SF14
BBS2	Bardet-Biedl syndrome 2	1.20581	0.269999	0.000133	0.003547	7.462	1	7.31454	7.37872	7.23581	7.66918	7.03592	7.09285	7.35875	7.58733	7.3992	7.38465	7.45501	7.64414	7.24747	7.5108	7.42458	7.67069	7.2894	7.65485	7.28949	7.79516	7.27174	7.64494	7.10179	7.85674	7.43777	7.76385	7.52535	7.40985	7.48589	7.70971	583	BBS
FAM134C	family with sequence similarity 134_ member C	1.20729	0.271777	0.003752	0.046236	9.5652	1	9.42417	9.93383	9.24267	9.77874	9.12362	9.86009	8.90999	9.69867	9.40083	9.48309	9.20004	9.46817	9.32689	9.43095	9.38476	9.15435	9.17817	9.72686	9.55771	9.9425	9.41	9.9165	9.51949	9.855	9.66923	9.76679	9.86763	9.6673	9.81927	9.53632	162427	-
NPLOC4	NPL4 homolog_ ubiquitin recognition factor	1.20955	0.274471	0.001794	0.026336	10.2425	1	10.1169	10.4416	9.71201	10.5559	10.3114	10.68	10.3469	10.4379	10.3507	10.6426	9.70143	10.3892	10.1718	10.2207	10.1377	10.0344	9.98744	10.1608	10.3841	10.2853	10.1643	10.158	9.55261	10.3458	9.92041	10.3448	10.3451	10.2876	9.94054	10.4905	55666	NPL4
COG2	component of oligomeric golgi complex 2	1.21042	0.275507	0.000526	0.010194	7.2365	1	7.22826	7.33066	7.21696	7.0818	7.24091	7.13665	7.39134	7.5385	7.07619	7.22295	7.12052	7.56532	6.80522	7.6848	7.05023	7.46882	6.74022	7.21224	6.7741	7.4815	7.22989	7.42454	7.0636	7.53053	7.24747	7.40576	6.97002	7.32506	7.22447	7.04793	22796	LDLC
NCSTN	nicastrin	1.21273	0.278261	0.00082	0.0145	9.2732	1	9.32127	9.39186	8.69341	9.68316	8.83277	9.60804	9.25069	9.23696	9.02087	9.54855	8.85298	9.36723	9.12384	9.46262	9.12216	9.15899	9.12993	9.38282	9.24523	9.55969	8.78333	9.26738	9.30913	9.51852	9.31061	9.43394	9.54352	8.94484	9.11785	9.40379	23385	ATAG1874
NCOA5	nuclear receptor coactivator 5	1.21383	0.279563	0.002938	0.038428	7.7675	1	7.95612	7.85715	7.39527	7.87429	7.1335	7.8556	7.67341	8.06066	7.25029	8.1485	7.10204	8.16312	7.62578	8.10795	7.71256	7.74661	7.48001	7.79171	7.80995	7.45763	7.85014	7.64018	7.87187	7.7518	7.54699	7.95453	7.92534	7.97121	7.68994	8.05859	57727	CIA, BA465L10.6
SYTL1	synaptotagmin-like 1	1.21613	0.282298	0.000493	0.009724	11.2959	1	10.8118	11.6234	10.949	11.6921	11.3785	11.3036	10.9096	11.3005	11.1469	11.3371	11.3116	11.2871	11.2044	11.2676	11.3643	11.4385	11.1744	11.3707	11.3839	11.5054	10.7377	11.6506	11.2639	11.7168	11.0306	11.2973	11.4378	11.3906	10.844	11.1416	84958	JFC1, SLP1
ARRDC1	arrestin domain containing 1	1.21641	0.282631	0.001292	0.020585	9.8046	1	9.90753	10.1809	9.57804	9.70366	9.75657	10.053	9.46234	9.8386	9.36999	9.91795	9.28441	9.55669	9.51964	9.94085	9.31977	9.94861	9.30697	9.82471	9.48534	9.90062	9.89482	9.99877	9.75788	10.1041	9.90144	9.89332	10.0698	10.2593	9.90559	9.84591	92714	-
USP8	ubiquitin specific peptidase 8	1.21675	0.283034	0.000791	0.014117	8.5643	1	8.38464	8.63735	8.24969	8.45375	8.32894	8.79623	8.62032	8.8016	8.44873	8.65061	8.43252	8.90113	8.16282	9.02947	8.64216	8.93121	8.23457	8.4886	8.30809	8.49866	8.85735	8.62214	8.63811	8.45643	7.98988	8.72374	8.40099	8.95898	8.34576	8.39538	9101	HUMORF8, SPG59, UBPY
PHF10	PHD finger protein 10	1.2171	0.283449	0.003778	0.046378	7.2416	1	7.29968	7.27247	6.69704	7.21834	6.9411	7.418	7.48492	7.61376	7.30623	7.63557	6.67183	7.24963	6.80522	7.13402	6.95452	7.25151	7.00272	7.03341	7.07417	7.16513	6.91036	7.61127	7.0144	7.50094	7.28399	7.42307	7.65332	7.66688	7.0195	7.41644	55274	BAF45A, XAP135
NIPBL	Nipped-B homolog (Drosophila)	1.21797	0.284481	0.002002	0.02856	8.4516	1	8.43988	8.62079	7.87584	8.70974	7.84381	8.90915	8.52562	8.7714	8.21298	8.73052	8.00527	8.46246	8.09268	8.40415	8.20052	8.02589	8.29181	8.51611	8.50181	8.36902	8.50934	8.30173	8.37125	8.44093	8.39656	8.70498	8.5177	8.83158	8.52613	8.80829	25836	CDLS, CDLS1, IDN3, IDN3-B, SCC2
TBC1D2	TBC1 domain family_ member 2	1.21844	0.285033	0.001584	0.024208	9.7191	1	10.0191	9.83248	9.2908	10.0792	9.71275	10.1945	9.66366	9.70606	9.67364	10.1662	9.1604	9.94814	9.52364	9.7187	9.43746	9.46457	9.36646	9.51686	9.66439	9.66246	9.59238	9.58482	9.18343	9.92721	9.60212	9.97679	9.81994	9.82099	9.56719	10.0151	55357	PARIS-1, PARIS1, TBC1D2A
MAPK1	mitogen-activated protein kinase 1	1.22128	0.288397	0.003947	0.04799	9.5627	1	9.54142	9.64376	9.06691	9.82759	9.4796	10.0089	10.053	9.56147	9.4744	9.91685	9.14242	9.86361	9.17734	10.204	9.32419	9.78121	9.36979	9.33573	9.31731	9.40852	9.66288	9.45257	9.31929	9.471	9.15911	9.61183	9.43294	9.32195	9.3325	9.80668	5594	ERK, ERK-2, ERK2, ERT1, MAPK2, P42MAPK, PRKM1, PRKM2, P38, P40, P41, P41MAPK, P42-MAPK
PEX13	peroxisomal biogenesis factor 13	1.22169	0.288873	0.001104	0.018308	8.5381	1	8.47336	8.9069	8.58729	8.70974	7.83856	8.74621	8.59489	8.2579	8.4946	8.54906	8.51517	8.7817	8.23947	9.03169	8.43681	9.10713	8.57152	8.42326	8.33095	8.72948	8.41445	8.81191	8.33564	8.36085	8.12686	8.38097	8.38059	8.60158	8.30116	8.50923	5194	NALD, PBD11A, PBD11B, ZWS
CFLAR	CASP8 and FADD-like apoptosis regulator	1.22391	0.291502	0.001475	0.022958	9.5129	1	9.06138	9.88196	9.03497	9.73956	9.28483	9.92524	9.59185	9.70852	9.23418	9.81411	9.24495	9.34043	9.37644	9.7474	9.41689	9.74465	9.78428	9.29978	9.55633	9.65513	9.55686	9.54335	8.98317	9.43885	9.21927	9.44387	9.71629	9.88903	9.0042	9.44525	8837	CASH, CASP8AP1, CLARP, CASPER, FLAME, FLAME-1, FLAME1, FLIP, I-FLICE, MRIT, C-FLIP, C-FLIPL, C-FLIPR, C-FLIPS
FBXO18	F-box protein_ helicase_ 18	1.22455	0.292256	2.97e-05	0.00113	8.872	1	9.07889	8.91236	8.6797	9.10055	8.48499	8.93667	8.63853	9.0541	8.46725	9.11556	8.51865	8.89654	8.68067	8.91366	8.66095	8.71202	8.46978	8.88656	8.79033	9.07525	8.9113	8.79058	8.64783	9.12974	8.85672	9.11856	8.84108	9.30544	8.92558	9.14161	84893	FBH1, FBX18
SERINC1	serine incorporator 1	1.22507	0.292868	0.002292	0.031651	10.38	1	10.2053	11.0101	10.1413	10.7021	9.8219	10.9676	10.1443	10.3344	10.4511	10.5035	10.1758	10.3206	10.0167	10.6215	10.2176	10.4149	10.5335	10.4033	10.3597	10.5565	10.0044	10.6344	10.225	10.5678	10.277	10.1208	10.4873	9.83128	10.1436	10.4153	57515	TDE1L, TDE2, TMS-2, TMS2
LRRC1	leucine rich repeat containing 1	1.22524	0.293069	0.002847	0.037404	8.3777	1	7.97805	8.5905	8.37406	8.65364	8.46467	8.84193	8.60187	8.25118	8.09883	9.03257	8.37211	8.59874	8.17305	8.86461	8.42862	8.60731	8.32304	8.22748	8.26466	8.31159	8.08539	8.33746	7.9154	8.46921	7.81374	8.16813	7.95876	8.24564	8.28408	8.28554	55227	LANO, DJ523E19.1
COG5	component of oligomeric golgi complex 5	1.22872	0.297159	0.004045	0.048895	7.8734	1	8.07139	7.64425	7.8516	8.03084	7.34087	7.95682	8.19424	7.86328	7.84395	7.7289	7.80845	7.71367	7.32293	8.13302	7.82091	8.17531	7.42989	7.99699	7.21422	8.09659	7.6184	7.88117	7.68954	8.19216	7.76935	8.22188	7.55478	7.81933	7.90638	8.58166	10466	CDG2I, GOLTC1, GTC90
KCTD10	potassium channel tetramerization domain containing 10	1.23005	0.298719	0.00054	0.010429	9.2863	1	9.24449	9.75113	8.73708	9.40774	9.32857	9.91521	9.48013	9.30829	9.26803	9.62338	8.99496	9.57693	9.274	9.40374	9.11537	9.46082	9.17437	9.09794	9.21921	9.29592	8.96011	9.10064	8.95737	9.30972	9.03871	9.29194	9.08252	9.10388	8.87702	9.55348	83892	BTBD28, MSTP028, ULRO61, HBACURD3
IRF2	interferon regulatory factor 2	1.23048	0.299226	0.001092	0.018193	8.2684	1	8.28507	8.14347	7.92315	8.43635	7.70641	8.15301	8.58083	8.22741	8.11066	8.31828	8.18284	8.69444	8.23947	8.82413	8.2133	8.62418	7.6647	8.33024	7.90004	8.21523	8.38615	8.32861	8.06305	8.32753	7.94497	8.52424	7.95876	8.63132	8.24928	8.24386	3660	IRF-2
GOSR1	golgi SNAP receptor complex member 1	1.23106	0.299901	2.29e-05	0.000924	8.1118	1	8.13693	8.15731	7.69689	8.04008	8.03042	8.1909	7.95357	8.44028	7.77623	8.40253	7.61346	8.39568	7.90898	8.16983	7.87016	8.30652	7.5462	8.10601	7.96827	8.39439	8.15971	8.22113	8.27426	8.11614	8.20512	8.38097	8.00747	8.24948	8.03451	8.22969	9527	GOLIM2, GOS-28, GOS28, GOS28/P28, GS28, P28
ZMYND11	zinc finger_ MYND-type containing 11	1.23154	0.300468	0.000792	0.014117	7.9223	1	7.62376	7.72084	7.59103	8.26169	7.56729	8.16151	8.3571	7.90241	7.94873	8.28452	7.80274	7.85765	7.44054	8.10373	7.76124	8.16612	7.6701	8.02023	7.5229	7.91218	7.81519	7.91704	7.76287	7.8332	7.69671	8.11584	7.83825	8.02147	7.87629	8.57046	10771	BRAM1, BS69, MRD30
STRN4	striatin_ calmodulin binding protein 4	1.23336	0.302599	0.000192	0.004725	10.0492	1	9.99697	10.0972	9.33519	10.2856	10.0906	10.3616	10.125	10.1133	9.97054	10.4947	9.447	10.3351	9.96264	10.0214	9.90939	9.8271	9.86076	10.0132	9.87454	10.0349	10.0607	9.9885	9.62978	10.2319	9.91315	10.1721	10.0389	10.3604	9.8925	10.4163	29888	ZIN, ZINEDIN
UBE3B	ubiquitin protein ligase E3B	1.23477	0.304244	0.001662	0.024854	8.4031	1	8.24944	8.87374	8.02964	8.51469	7.6355	8.86295	8.82704	8.39528	8.02573	8.75291	7.94951	8.51733	8.20332	8.43136	8.18438	7.9899	8.17116	8.49414	8.40667	8.54697	8.24622	8.45056	8.2232	8.65976	8.25197	8.5349	8.65993	8.58952	8.23157	8.46959	89910	BPIDS, KOS
CDC40	cell division cycle 40	1.23672	0.306517	0.001561	0.023994	7.1157	1	6.98995	7.09202	7.00249	6.7847	6.52344	7.01987	7.05402	7.42367	6.94136	6.79443	7.08332	7.29918	6.69592	7.56093	7.13327	7.61776	6.86805	7.32852	6.4315	7.18852	7.16475	7.33898	7.24518	7.26905	7.29298	7.52816	6.8205	7.31043	6.94898	7.21064	51362	EHB3, PRP17, PRPF17
AFTPH	aftiphilin	1.2415	0.312085	0.000915	0.015827	8.8472	1	8.72019	8.98661	8.46076	9.03271	8.6349	9.12242	8.91186	9.11643	8.57366	9.00381	8.76761	9.3114	8.53224	9.4003	8.81143	9.26174	8.59445	8.78619	8.54992	8.77269	9.0135	8.84539	8.84646	8.6508	8.44171	9.14663	8.19675	8.76608	8.97255	8.45343	54812	NBLA10388
HIF1AN	hypoxia inducible factor 1_ alpha subunit inhibitor	1.24195	0.312603	0.00167	0.024909	8.6436	1	8.5486	8.53147	8.42834	8.56678	8.09351	8.51017	8.37893	8.99901	8.38846	8.89168	8.28468	8.56441	8.45886	8.47123	8.29071	8.2897	8.2199	8.96251	8.57201	8.73148	8.73553	8.6743	8.66706	9.06382	8.62725	9.20619	8.7581	8.66621	8.58778	9.35459	55662	FIH1
MTERFD2	mitochondrial transcription termination factor 4	1.24208	0.312754	0.00043	0.008756	7.3973	1	7.24386	7.54242	7.62003	7.53833	7.02672	7.43914	7.22651	7.73431	7.06812	7.50093	7.16572	7.25681	7.1051	7.76183	7.20541	7.96363	7.18751	7.55229	7.14957	7.64261	6.77141	7.6917	7.54456	7.5738	7.42147	7.52281	7.53276	6.99077	7.09981	7.34814	130916	MTERFD2, MTERF4
KCTD21	potassium channel tetramerization domain containing 21	1.24263	0.313391	0.000135	0.003607	7.4191	1	7.33411	7.40217	6.93486	7.53833	7.0811	7.18752	7.7212	7.38735	7.18464	7.65684	7.34929	7.74466	7.22141	7.76183	7.21815	7.31107	7.20251	7.7962	7.38618	7.62557	7.31241	7.45739	7.12979	7.71792	6.99554	7.63108	7.0955	7.40297	7.54446	7.83976	283219	KCASH2
RABGAP1	RAB GTPase activating protein 1	1.24271	0.313485	0.000178	0.00448	8.9048	1	8.79977	9.04488	8.25894	9.00702	8.65297	9.18634	9.27127	8.98085	8.66475	9.2121	8.76761	9.13938	8.67588	9.41401	8.89312	8.94202	8.88457	8.83725	8.65716	8.91621	8.60657	8.65319	8.74755	9.01233	8.49331	9.21118	8.95309	9.18029	8.50663	8.97042	23637	GAPCENA, TBC1D11
PPP6C	protein phosphatase 6_ catalytic subunit	1.24301	0.313834	0.002368	0.032367	8.6986	1	8.76954	8.60404	8.76331	8.78313	8.27164	8.57529	8.72205	8.96861	8.1684	8.58833	8.57334	8.99219	8.36677	9.42081	8.23852	9.06079	8.32989	8.84595	8.04531	8.79572	9.03493	8.84332	8.67658	8.59822	8.56184	8.90924	8.19675	8.88192	8.8846	8.63638	5537	PP6, PP6C
LAMP1	lysosomal-associated membrane protein 1	1.24317	0.314024	0.002013	0.028654	11.3749	1	11.3107	11.7804	10.9157	11.7471	11.0643	11.8155	11.2463	11.6699	11.2759	11.8291	10.8719	11.6744	11.3325	11.3308	11.2328	10.9559	11.1378	11.2676	11.5026	11.6284	10.8211	11.4128	11.1472	11.5016	11.3865	11.5124	11.4662	10.665	11.2026	11.6161	3916	CD107A, LAMPA, LGP120
GOLGA5	golgin A5	1.24319	0.314051	0.000546	0.010508	8.5231	1	8.46673	8.77542	8.2121	8.81847	8.36956	9.06916	8.78473	8.18926	8.34571	8.78465	8.11993	8.93959	8.14906	9.02724	8.33231	8.91759	8.3333	8.376	8.29819	8.33536	8.59837	8.38092	8.28674	8.52906	8.20988	8.51081	8.37647	8.50531	8.3567	8.63996	9950	GOLIM5, RFG5, RET-II
TXNDC11	thioredoxin domain containing 11	1.24327	0.31414	0.002842	0.037396	8.6057	1	8.45784	9.08648	8.24969	8.94195	8.36592	9.15261	8.33493	8.33301	8.63229	8.79668	8.44724	8.80639	8.481	8.77187	8.41208	9.00263	8.62261	8.66116	8.94859	8.70739	7.91099	8.54018	8.41741	8.85168	8.24272	8.62992	8.39693	7.79851	8.44646	8.84283	51061	EFP1
ALG2	ALG2_ alpha-1_3/1_6-mannosyltransferase	1.24382	0.314773	0.000515	0.010046	8.0855	1	7.99044	8.38226	7.46884	8.42581	7.43435	8.26382	8.00361	8.01379	7.86738	8.25693	7.95981	8.47483	7.78102	8.57551	7.84984	8.51264	7.77921	7.75523	7.93881	8.0334	8.09708	8.11875	7.91003	8.15465	7.95633	8.02048	8.22449	8.04817	8.3292	8.31715	85365	CDGII, CMS14, CMSTA3, NET38, HALPG2
BROX	BRO1 domain and CAAX motif containing	1.24448	0.315544	0.001655	0.024815	8.3798	1	8.38229	8.54909	8.24505	8.72128	8.22007	8.73485	8.73903	8.39528	7.86738	8.64796	7.83667	8.62396	7.79875	9.09898	8.17134	8.80077	8.28478	8.29255	8.09575	8.15119	8.49616	8.33157	8.10596	8.22871	8.11678	8.41886	8.31759	8.39524	8.24928	8.30369	148362	C1ORF58
ARNT	aryl hydrocarbon receptor nuclear translocator	1.24509	0.316253	0.003517	0.04406	7.803	1	7.80651	7.78764	7.32657	8.00747	6.92136	8.47307	7.93526	7.791	7.74621	8.29133	7.3571	7.87176	7.26671	8.0695	7.60028	7.47627	7.88994	7.66963	7.82383	7.58648	7.83626	7.81512	7.76882	7.98694	7.42965	7.86867	7.85609	8.03488	7.64603	8.31268	405	HIF-1-BETA, HIF-1BETA, HIF1-BETA, HIF1B, HIF1BETA, TANGO, BHLHE2
STX12	syntaxin 12	1.24542	0.316634	0.000674	0.012429	8.2397	1	8.07721	8.45507	8.09306	8.18461	7.94013	8.32568	8.56425	8.28776	8.02989	8.30487	8.13819	8.58739	7.99992	8.96577	7.88222	8.82724	8.15582	8.09145	7.65814	8.27654	8.0316	8.27741	8.08228	8.27023	7.88679	8.49997	8.18268	8.17067	8.21963	8.06923	23673	STX13, STX14
TARS2	threonyl-tRNA synthetase 2_ mitochondrial (putative)	1.24546	0.316675	0.000525	0.010194	8.3287	1	8.38932	8.61076	8.33086	8.75534	8.1023	8.73485	7.77982	8.21711	8.01318	8.35127	8.19597	8.21568	7.79434	8.20573	7.87016	8.22038	7.88064	8.67343	7.98894	8.66215	8.40037	8.50132	8.36734	8.78164	8.36708	8.4417	8.34312	8.19078	8.40492	8.42884	80222	COXPD21, TARSL1, THRRS
PKP4	plakophilin 4	1.24881	0.320551	0.000853	0.015008	9.0417	1	8.83282	9.18439	8.34396	9.48591	8.63187	9.34413	9.42216	9.07517	9.09222	9.56552	8.70163	9.20399	8.64925	9.29686	9.06161	8.81847	8.85164	9.04226	9.03663	9.07368	8.97918	8.82875	8.70787	8.97695	8.82299	9.01959	9.00999	9.42909	8.6108	9.36759	8502	P0071
LLGL2	lethal giant larvae homolog 2 (Drosophila)	1.25222	0.324483	0.000265	0.00599	10.6215	1	10.566	10.748	10.4159	10.6457	10.7641	10.7437	10.5554	10.766	10.1665	10.4489	10.1625	10.6467	10.1225	10.6864	10.0317	10.8372	10.2346	10.7476	10.0822	10.837	10.7018	10.8718	10.2708	10.9274	10.5412	10.7586	10.9702	10.9515	10.7402	10.9475	3993	HGL, HUGL-2, LGL2
RNF114	ring finger protein 114	1.25244	0.324738	0.001907	0.027539	9.0819	1	8.81726	9.37418	8.76655	9.57126	8.96638	9.24955	8.90999	8.83793	8.70172	8.94452	9.18475	9.5625	9.03125	9.62901	8.98169	9.99604	8.91904	8.9685	8.81138	8.95253	8.90134	8.90217	9.01103	9.01582	8.79796	9.0005	8.86183	8.86199	8.9219	9.09548	55905	PSORS12, ZNF313
ARFGEF1	ADP-ribosylation factor guanine nucleotide-exchange factor 1 (brefeldin A-inhibited)	1.25285	0.325211	0.000203	0.004936	9.1227	1	9.07599	9.2156	8.57993	9.39519	8.5539	9.46932	9.44174	9.45731	9.17906	9.09233	8.70775	9.38537	8.68544	9.39858	8.71811	9.1262	8.99641	9.02129	9.0045	9.25911	8.85046	9.1298	9.07242	9.22178	9.04138	9.44669	9.15399	8.8645	8.91081	9.54206	10565	ARFGEP1, BIG1, P200
OXR1	oxidation resistance 1	1.25318	0.325591	0.000804	0.014287	8.8834	1	8.99838	9.02236	8.91725	8.91206	8.20382	9.19673	8.70054	8.96245	8.62406	8.82982	8.61304	8.80149	8.35183	9.40888	8.52146	9.16361	8.73265	9.14451	8.55547	9.07525	8.21974	9.16503	9.07242	9.08058	8.8718	8.93562	9.09259	8.48592	8.8307	9.21055	55074	NBLA00307, TLDC3
PRRG4	proline rich Gla (G-carboxyglutamic acid) 4 (transmembrane)	1.25412	0.326678	0.000265	0.006002	11.1903	1	11.1092	11.2082	11.2179	11.0936	10.9551	11.2592	11.1396	11.1255	10.8931	11.3114	11.0656	11.7457	10.828	11.9392	10.9814	11.6509	10.818	11.1886	10.749	11.2438	11.3026	11.4783	11.1483	11.0673	10.9131	11.1312	10.8639	11.378	11.1335	10.9929	79056	PRGP4, TMG4
BRD8	bromodomain containing 8	1.25455	0.327174	0.000219	0.005209	8.5175	1	8.37286	8.78437	8.45675	8.68638	7.66547	8.65878	8.48593	8.59953	8.16462	8.65854	8.08742	8.28056	8.16624	8.70656	8.24787	8.30233	8.23457	8.58787	8.22687	8.79952	8.28761	8.69281	8.48399	8.70803	8.61656	8.72839	8.83809	8.9753	8.54059	8.82095	10902	SMAP, SMAP2, P120
SON	SON DNA binding protein	1.25511	0.327816	0.001155	0.018895	10.9466	1	10.7162	11.5391	10.6684	11.3663	10.571	11.744	10.7746	11.0238	10.5237	11.3085	10.5261	11.1768	10.6738	11.0207	10.7947	10.8701	10.7916	10.6348	11.1666	10.808	11.0013	10.7472	10.6842	10.7119	10.7201	10.9439	10.9898	11.1683	10.8135	10.9887	6651	BASS1, C21ORF50, DBP-5, NREBP, SON3
STAT3	signal transducer and activator of transcription 3 (acute-phase response factor)	1.25694	0.329919	0.000432	0.008762	11.594	1	11.6234	11.3671	11.206	11.7429	11.2966	11.7982	11.6162	11.8408	11.3135	11.7751	11.2888	12.0191	11.1865	12.0696	11.3682	11.979	11.0729	11.4559	11.2673	11.4218	12.0203	11.4486	11.5171	11.6184	11.1318	11.8065	11.3773	11.735	11.6653	11.9468	6774	ADMIO, APRF, HIES
DDX6	DEAD (Asp-Glu-Ala-Asp) box helicase 6	1.2585	0.331704	6.3e-06	0.000352	9.5136	1	9.49869	9.50807	9.1587	9.41663	9.19932	9.58293	9.72887	9.67125	9.10608	9.89576	9.21946	9.68473	9.24033	9.54433	9.3079	9.20232	9.23582	9.67044	9.32546	9.73773	9.51609	9.53439	9.26563	9.75515	9.46967	9.88188	9.36394	9.92068	9.31859	9.89161	1656	HLR2, P54, RCK
LINC00657	long intergenic non-protein coding RNA 657	1.2593	0.332617	5.56e-05	0.001803	11.0204	1	10.8505	11.0018	11.0457	11.2831	10.6246	11.1824	10.8566	11.0879	10.8549	11.2886	10.8099	11.3964	10.6478	11.3905	11.0618	11.3275	10.6544	11.2048	11.007	11.249	10.3588	11.3398	10.8878	11.0054	10.9766	11.092	10.8691	10.4076	10.981	11.1678	647979	-
GAK	cyclin G associated kinase	1.2599	0.333307	0.003373	0.042884	9.9754	1	10	10.182	9.40558	10.1255	9.48969	10.4963	9.62306	10.2031	9.56031	10.1964	9.15368	10.1165	9.65234	9.57667	9.67657	9.32502	9.84769	10.0093	10.1959	10.1065	10.029	9.96109	9.77275	10.3882	9.96186	10.301	10.3217	10.3408	9.81927	10.2991	2580	DNAJ26, DNAJC26
TMEM214	transmembrane protein 214	1.26171	0.335378	0.001957	0.028	9.1147	1	9.0687	9.22001	8.63068	9.5325	8.75963	9.69851	8.91933	9.12931	8.95458	9.45149	8.30502	9.34381	9.18747	8.92088	9.15234	8.49073	8.88457	9.27906	9.38595	9.34228	8.70149	9.1733	8.82093	9.54896	8.81989	9.44245	9.24934	8.87944	8.86558	9.28323	54867	-
APPBP2	amyloid beta precursor protein (cytoplasmic tail) binding protein 2	1.26201	0.33572	0.00093	0.015975	7.8237	1	7.8135	8.07218	7.53884	8.04926	7.55454	8.15301	8.0349	7.94467	7.51649	8.11047	7.87527	8.37602	7.4235	8.50683	7.58068	8.29813	7.5403	7.76444	7.44124	7.81031	7.50893	7.68247	7.8938	7.58794	7.64851	7.96639	7.58363	7.34673	7.62809	7.70971	10513	APP-BP2, HS.84084, PAT1
RBM4	RNA binding motif protein 4	1.26248	0.336258	0.000163	0.0042	8.6296	1	8.45337	8.8398	8.42424	8.65063	8.26774	8.53984	8.42426	8.54289	8.12628	8.58	8.47623	8.82343	8.43071	9.09686	8.20692	8.96074	8.39664	8.7907	8.04531	8.86994	8.24622	8.80555	8.58181	8.93884	9.00902	8.64722	8.98318	8.79789	8.37295	8.87048	5936	LARK, RBM4A, ZCCHC21, ZCRB3A
RBM23	RNA binding motif protein 23	1.26301	0.336869	0.00103	0.017435	8.6385	1	8.4556	8.81672	7.96895	9.12246	8.97836	8.83131	8.81107	8.72122	8.38521	8.99758	8.37596	9.04709	8.26839	9.20722	8.56449	8.8214	8.52453	8.61865	8.56927	8.71345	8.16527	8.72914	8.60858	8.60055	8.25197	8.7537	8.38059	7.97121	8.28979	8.72321	55147	CAPERBETA, PP239, RNPC4
LRBA	LPS-responsive vesicle trafficking_ beach and anchor containing	1.26339	0.337296	0.001395	0.021897	8.8253	1	8.96424	8.68592	8.46876	8.69519	8.08909	9.03021	9.11091	9.24374	8.55646	8.89839	8.4064	8.81615	8.36974	8.76654	8.56698	8.50173	8.48826	9.14803	8.77613	8.96104	8.85046	8.99273	8.84365	9.20506	8.58031	9.33374	8.57269	8.64596	8.74589	9.51116	987	BGL, CDC4L, CVID8, LAB300, LBA
STRIP1	striatin interacting protein 1	1.26378	0.337744	0.000484	0.009584	8.123	1	8.03298	8.46623	7.45281	8.40092	8.01187	8.77144	8.1694	8.24443	8.11066	8.43674	7.63933	8.38261	7.93727	8.00758	8.01953	8.01058	7.78918	7.96939	8.03342	8.17481	7.62648	8.0806	7.83833	8.33593	8.04943	8.49725	8.42908	7.83985	7.76575	8.41638	85369	FAM40A, FAR11A
UBE2J1	ubiquitin-conjugating enzyme E2_ J1	1.26591	0.340178	0.001	0.016989	9.1252	1	8.95162	9.0399	9.1463	9.07154	8.75127	9.12894	8.95247	9.32917	8.64319	9.09428	8.56998	9.17205	8.51088	9.6246	8.61593	9.44382	8.67196	9.26291	8.48444	9.35397	9.39587	9.4485	9.29271	9.27519	9.05993	9.33526	9.08252	9.49688	9.52175	9.09808	51465	CGI-76, HSPC153, HSPC205, HSU93243, NCUBE-1, NCUBE1, UBC6, UBC6E, UBC6P
TRIM24	tripartite motif containing 24	1.26658	0.340941	0.003274	0.041895	8.5292	1	8.6201	8.75736	8.51965	8.85297	7.93029	9.04178	8.78064	8.78309	8.09883	8.93367	8.09211	9.10397	7.95714	8.97966	8.18438	8.68333	8.15196	8.2308	8.30809	8.31691	8.82258	8.30173	8.5986	8.15465	8.33698	8.66915	7.95876	8.40904	8.44646	8.76638	8805	PTC6, RNF82, TF1A, TIF1, TIF1A, TIF1ALPHA, HTIF1
KCTD20	potassium channel tetramerization domain containing 20	1.26743	0.341903	1.38e-05	0.000631	8.4817	1	8.63792	8.56302	8.32647	8.62321	8.05779	8.67372	8.56186	8.48679	8.18714	8.4581	8.01518	8.51433	7.96501	8.88934	8.09398	8.71518	8.3196	8.78619	8.0174	8.64746	8.20901	8.85979	8.5986	8.70587	8.34132	8.68598	8.32187	8.38481	8.63795	8.60746	222658	C6ORF69, DJ108K11.3
THTPA	thiamine triphosphatase	1.26781	0.342341	0.000493	0.009724	6.3098	2	6.15223	6.27332	6.13919	6.30669	6.23451	6.522	5.97451	6.39595	6.03812	6.12223	6.14897	6.57292	6.13661	6.77909	6.33695	6.6842	5.74343	6.38001	5.64856	6.73568	5.94835	6.54413	6.66497	6.70326	6.07091	6.60332	6.40164	6.02017	6.30356	6.40818	79178	THTP, THTPASE
ATF6	activating transcription factor 6	1.26867	0.343314	3.05e-05	0.001151	8.3591	1	8.26737	8.63735	8.06169	8.94687	8.09351	8.74338	8.43993	8.35197	8.359	8.57443	8.22187	8.62118	8.24595	8.79038	8.29071	8.65734	8.12859	8.35482	8.30809	8.50566	7.84321	8.4775	8.16577	8.30202	8.02266	8.43602	8.16847	7.93828	7.93585	8.28554	22926	ATF6A
GOLPH3	golgi phosphoprotein 3 (coat-protein)	1.2688	0.343464	4.84e-05	0.001637	9.3984	1	9.48781	9.48995	9.46672	9.37707	8.89986	9.47103	9.14794	9.39771	9.1621	9.53856	9.12651	9.54793	8.69731	9.8404	8.80088	9.61055	9.31907	9.45424	8.86382	9.5199	9.46515	9.57113	9.39237	9.53321	9.1883	9.52763	9.25383	9.75094	9.62939	9.72487	64083	GOPP1, GPP34, MIDAS, VPS74
[truncated: 844 more rows]
